# Supplementary material for: Structural motif search across the protein-universe with Folddisco
Source: Research Square preprint supplement (doi:10.21203/rs.3.rs-7273586/v1), 2025-08-07
Supplement: Supplementary file 1 [file 8ca600b7b03c886435e4adc1.xlsx]

## Sheet: Supplementary Table 1
Supplementary Table 1. Hit counts returned by Folddisco, MASTER, and pyScoMotif for discrete vs segmented zinc-finger queries against human proteome
pdb_id	query_residues	query_type	tool	num_structure_hits	description
1G2F	F207,F212,F225,F229	discrete	Folddisco	742
1G2F	F207,F212,F225,F229	discrete	MASTER	22457	72178282 motif hits
1G2F	F207,F212,F225,F229	discrete	pyScoMotif	304
1G2F	F204-F215,F222-F232	segmented	Folddisco	682
1G2F	F204-F215,F222-F232	segmented	MASTER	964
1G2F	F204-F215,F222-F232	segmented	pyScoMotif	0	No hits

## Sheet: Supplementary Table 2
Supplementary Table 2. Search runtimes for M-CSA queries across diverse databases using Folddisco and Folddisco pre-filter
query	index	num_threads	filter	tool	runtime	num_results	result_path
query/M-CSA/single/M0001.txt	e_coli_filtered_folddisco	12	--covered-node-ratio 0.75 --rmsd 2.0	Folddisco	0.048	0	result/M0001_e_coli_filtered_folddisco_Folddisco.tsv
query/M-CSA/single/M0001.txt	e_coli_filtered_folddisco	12	--covered-node-ratio 0.75 --skip-match	Folddisco_prefilter	0.017	1	result/M0001_e_coli_filtered_folddisco_Folddisco_prefilter.tsv
query/M-CSA/single/M0002.txt	e_coli_filtered_folddisco	12	--covered-node-ratio 0.75 --rmsd 2.0	Folddisco	0.07	2	result/M0002_e_coli_filtered_folddisco_Folddisco.tsv
query/M-CSA/single/M0002.txt	e_coli_filtered_folddisco	12	--covered-node-ratio 0.75 --skip-match	Folddisco_prefilter	0.016	8	result/M0002_e_coli_filtered_folddisco_Folddisco_prefilter.tsv
query/M-CSA/single/M0003.txt	e_coli_filtered_folddisco	12	--covered-node-ratio 0.75 --rmsd 2.0	Folddisco	0.022	0	result/M0003_e_coli_filtered_folddisco_Folddisco.tsv
query/M-CSA/single/M0003.txt	e_coli_filtered_folddisco	12	--covered-node-ratio 0.75 --skip-match	Folddisco_prefilter	0.017	0	result/M0003_e_coli_filtered_folddisco_Folddisco_prefilter.tsv
query/M-CSA/single/M0004.txt	e_coli_filtered_folddisco	12	--covered-node-ratio 0.75 --rmsd 2.0	Folddisco	0.03	0	result/M0004_e_coli_filtered_folddisco_Folddisco.tsv
query/M-CSA/single/M0004.txt	e_coli_filtered_folddisco	12	--covered-node-ratio 0.75 --skip-match	Folddisco_prefilter	0.02	1	result/M0004_e_coli_filtered_folddisco_Folddisco_prefilter.tsv
query/M-CSA/single/M0005.txt	e_coli_filtered_folddisco	12	--covered-node-ratio 0.75 --rmsd 2.0	Folddisco	0.053	23	result/M0005_e_coli_filtered_folddisco_Folddisco.tsv
query/M-CSA/single/M0005.txt	e_coli_filtered_folddisco	12	--covered-node-ratio 0.75 --skip-match	Folddisco_prefilter	0.015	10	result/M0005_e_coli_filtered_folddisco_Folddisco_prefilter.tsv
query/M-CSA/single/M0006.txt	e_coli_filtered_folddisco	12	--covered-node-ratio 0.75 --rmsd 2.0	Folddisco	0.025	0	result/M0006_e_coli_filtered_folddisco_Folddisco.tsv
query/M-CSA/single/M0006.txt	e_coli_filtered_folddisco	12	--covered-node-ratio 0.75 --skip-match	Folddisco_prefilter	0.018	2	result/M0006_e_coli_filtered_folddisco_Folddisco_prefilter.tsv
query/M-CSA/single/M0007.txt	e_coli_filtered_folddisco	12	--covered-node-ratio 0.75 --rmsd 2.0	Folddisco	0.042	13	result/M0007_e_coli_filtered_folddisco_Folddisco.tsv
query/M-CSA/single/M0007.txt	e_coli_filtered_folddisco	12	--covered-node-ratio 0.75 --skip-match	Folddisco_prefilter	0.013	11	result/M0007_e_coli_filtered_folddisco_Folddisco_prefilter.tsv
query/M-CSA/single/M0008.txt	e_coli_filtered_folddisco	12	--covered-node-ratio 0.75 --rmsd 2.0	Folddisco	0.041	10	result/M0008_e_coli_filtered_folddisco_Folddisco.tsv
query/M-CSA/single/M0008.txt	e_coli_filtered_folddisco	12	--covered-node-ratio 0.75 --skip-match	Folddisco_prefilter	0.02	6	result/M0008_e_coli_filtered_folddisco_Folddisco_prefilter.tsv
query/M-CSA/single/M0009.txt	e_coli_filtered_folddisco	12	--covered-node-ratio 0.75 --rmsd 2.0	Folddisco	0.094	0	result/M0009_e_coli_filtered_folddisco_Folddisco.tsv
query/M-CSA/single/M0009.txt	e_coli_filtered_folddisco	12	--covered-node-ratio 0.75 --skip-match	Folddisco_prefilter	0.023	13	result/M0009_e_coli_filtered_folddisco_Folddisco_prefilter.tsv
query/M-CSA/single/M0010.txt	e_coli_filtered_folddisco	12	--covered-node-ratio 0.75 --rmsd 2.0	Folddisco	0.065	27	result/M0010_e_coli_filtered_folddisco_Folddisco.tsv
query/M-CSA/single/M0010.txt	e_coli_filtered_folddisco	12	--covered-node-ratio 0.75 --skip-match	Folddisco_prefilter	0.013	12	result/M0010_e_coli_filtered_folddisco_Folddisco_prefilter.tsv
query/M-CSA/single/M0011.txt	e_coli_filtered_folddisco	12	--covered-node-ratio 0.75 --rmsd 2.0	Folddisco	0.015	0	result/M0011_e_coli_filtered_folddisco_Folddisco.tsv
query/M-CSA/single/M0011.txt	e_coli_filtered_folddisco	12	--covered-node-ratio 0.75 --skip-match	Folddisco_prefilter	0.012	0	result/M0011_e_coli_filtered_folddisco_Folddisco_prefilter.tsv
query/M-CSA/single/M0012.txt	e_coli_filtered_folddisco	12	--covered-node-ratio 0.75 --rmsd 2.0	Folddisco	0.02	2	result/M0012_e_coli_filtered_folddisco_Folddisco.tsv
query/M-CSA/single/M0012.txt	e_coli_filtered_folddisco	12	--covered-node-ratio 0.75 --skip-match	Folddisco_prefilter	0.017	2	result/M0012_e_coli_filtered_folddisco_Folddisco_prefilter.tsv
query/M-CSA/single/M0013.txt	e_coli_filtered_folddisco	12	--covered-node-ratio 0.75 --rmsd 2.0	Folddisco	0.02	0	result/M0013_e_coli_filtered_folddisco_Folddisco.tsv
query/M-CSA/single/M0013.txt	e_coli_filtered_folddisco	12	--covered-node-ratio 0.75 --skip-match	Folddisco_prefilter	0.015	0	result/M0013_e_coli_filtered_folddisco_Folddisco_prefilter.tsv
query/M-CSA/single/M0014.txt	e_coli_filtered_folddisco	12	--covered-node-ratio 0.75 --rmsd 2.0	Folddisco	0.036	12	result/M0014_e_coli_filtered_folddisco_Folddisco.tsv
query/M-CSA/single/M0014.txt	e_coli_filtered_folddisco	12	--covered-node-ratio 0.75 --skip-match	Folddisco_prefilter	0.016	5	result/M0014_e_coli_filtered_folddisco_Folddisco_prefilter.tsv
query/M-CSA/single/M0015.txt	e_coli_filtered_folddisco	12	--covered-node-ratio 0.75 --rmsd 2.0	Folddisco	0.019	0	result/M0015_e_coli_filtered_folddisco_Folddisco.tsv
query/M-CSA/single/M0015.txt	e_coli_filtered_folddisco	12	--covered-node-ratio 0.75 --skip-match	Folddisco_prefilter	0.014	0	result/M0015_e_coli_filtered_folddisco_Folddisco_prefilter.tsv
query/M-CSA/single/M0016.txt	e_coli_filtered_folddisco	12	--covered-node-ratio 0.75 --rmsd 2.0	Folddisco	0.021	2	result/M0016_e_coli_filtered_folddisco_Folddisco.tsv
query/M-CSA/single/M0016.txt	e_coli_filtered_folddisco	12	--covered-node-ratio 0.75 --skip-match	Folddisco_prefilter	0.014	2	result/M0016_e_coli_filtered_folddisco_Folddisco_prefilter.tsv
query/M-CSA/single/M0017.txt	e_coli_filtered_folddisco	12	--covered-node-ratio 0.75 --rmsd 2.0	Folddisco	0.025	3	result/M0017_e_coli_filtered_folddisco_Folddisco.tsv
query/M-CSA/single/M0017.txt	e_coli_filtered_folddisco	12	--covered-node-ratio 0.75 --skip-match	Folddisco_prefilter	0.013	2	result/M0017_e_coli_filtered_folddisco_Folddisco_prefilter.tsv
query/M-CSA/single/M0018.txt	e_coli_filtered_folddisco	12	--covered-node-ratio 0.75 --rmsd 2.0	Folddisco	0.017	0	result/M0018_e_coli_filtered_folddisco_Folddisco.tsv
query/M-CSA/single/M0018.txt	e_coli_filtered_folddisco	12	--covered-node-ratio 0.75 --skip-match	Folddisco_prefilter	0.013	0	result/M0018_e_coli_filtered_folddisco_Folddisco_prefilter.tsv
query/M-CSA/single/M0019.txt	e_coli_filtered_folddisco	12	--covered-node-ratio 0.75 --rmsd 2.0	Folddisco	0.064	62	result/M0019_e_coli_filtered_folddisco_Folddisco.tsv
query/M-CSA/single/M0019.txt	e_coli_filtered_folddisco	12	--covered-node-ratio 0.75 --skip-match	Folddisco_prefilter	0.013	35	result/M0019_e_coli_filtered_folddisco_Folddisco_prefilter.tsv
query/M-CSA/single/M0020.txt	e_coli_filtered_folddisco	12	--covered-node-ratio 0.75 --rmsd 2.0	Folddisco	0.028	3	result/M0020_e_coli_filtered_folddisco_Folddisco.tsv
query/M-CSA/single/M0020.txt	e_coli_filtered_folddisco	12	--covered-node-ratio 0.75 --skip-match	Folddisco_prefilter	0.015	3	result/M0020_e_coli_filtered_folddisco_Folddisco_prefilter.tsv
query/M-CSA/single/M0021.txt	e_coli_filtered_folddisco	12	--covered-node-ratio 0.75 --rmsd 2.0	Folddisco	0.082	17	result/M0021_e_coli_filtered_folddisco_Folddisco.tsv
query/M-CSA/single/M0021.txt	e_coli_filtered_folddisco	12	--covered-node-ratio 0.75 --skip-match	Folddisco_prefilter	0.022	21	result/M0021_e_coli_filtered_folddisco_Folddisco_prefilter.tsv
query/M-CSA/single/M0022.txt	e_coli_filtered_folddisco	12	--covered-node-ratio 0.75 --rmsd 2.0	Folddisco	0.054	41	result/M0022_e_coli_filtered_folddisco_Folddisco.tsv
query/M-CSA/single/M0022.txt	e_coli_filtered_folddisco	12	--covered-node-ratio 0.75 --skip-match	Folddisco_prefilter	0.013	21	result/M0022_e_coli_filtered_folddisco_Folddisco_prefilter.tsv
query/M-CSA/single/M0023.txt	e_coli_filtered_folddisco	12	--covered-node-ratio 0.75 --rmsd 2.0	Folddisco	0.018	0	result/M0023_e_coli_filtered_folddisco_Folddisco.tsv
query/M-CSA/single/M0023.txt	e_coli_filtered_folddisco	12	--covered-node-ratio 0.75 --skip-match	Folddisco_prefilter	0.015	0	result/M0023_e_coli_filtered_folddisco_Folddisco_prefilter.tsv
query/M-CSA/single/M0024.txt	e_coli_filtered_folddisco	12	--covered-node-ratio 0.75 --rmsd 2.0	Folddisco	0.028	3	result/M0024_e_coli_filtered_folddisco_Folddisco.tsv
query/M-CSA/single/M0024.txt	e_coli_filtered_folddisco	12	--covered-node-ratio 0.75 --skip-match	Folddisco_prefilter	0.014	1	result/M0024_e_coli_filtered_folddisco_Folddisco_prefilter.tsv
query/M-CSA/single/M0025.txt	e_coli_filtered_folddisco	12	--covered-node-ratio 0.75 --rmsd 2.0	Folddisco	0.023	4	result/M0025_e_coli_filtered_folddisco_Folddisco.tsv
query/M-CSA/single/M0025.txt	e_coli_filtered_folddisco	12	--covered-node-ratio 0.75 --skip-match	Folddisco_prefilter	0.014	2	result/M0025_e_coli_filtered_folddisco_Folddisco_prefilter.tsv
query/M-CSA/single/M0026.txt	e_coli_filtered_folddisco	12	--covered-node-ratio 0.75 --rmsd 2.0	Folddisco	0.028	8	result/M0026_e_coli_filtered_folddisco_Folddisco.tsv
query/M-CSA/single/M0026.txt	e_coli_filtered_folddisco	12	--covered-node-ratio 0.75 --skip-match	Folddisco_prefilter	0.011	5	result/M0026_e_coli_filtered_folddisco_Folddisco_prefilter.tsv
query/M-CSA/single/M0027.txt	e_coli_filtered_folddisco	12	--covered-node-ratio 0.75 --rmsd 2.0	Folddisco	0.03	0	result/M0027_e_coli_filtered_folddisco_Folddisco.tsv
query/M-CSA/single/M0027.txt	e_coli_filtered_folddisco	12	--covered-node-ratio 0.75 --skip-match	Folddisco_prefilter	0.012	5	result/M0027_e_coli_filtered_folddisco_Folddisco_prefilter.tsv
query/M-CSA/single/M0028.txt	e_coli_filtered_folddisco	12	--covered-node-ratio 0.75 --rmsd 2.0	Folddisco	0.024	0	result/M0028_e_coli_filtered_folddisco_Folddisco.tsv
query/M-CSA/single/M0028.txt	e_coli_filtered_folddisco	12	--covered-node-ratio 0.75 --skip-match	Folddisco_prefilter	0.015	1	result/M0028_e_coli_filtered_folddisco_Folddisco_prefilter.tsv
query/M-CSA/single/M0029.txt	e_coli_filtered_folddisco	12	--covered-node-ratio 0.75 --rmsd 2.0	Folddisco	0.025	2	result/M0029_e_coli_filtered_folddisco_Folddisco.tsv
query/M-CSA/single/M0029.txt	e_coli_filtered_folddisco	12	--covered-node-ratio 0.75 --skip-match	Folddisco_prefilter	0.013	2	result/M0029_e_coli_filtered_folddisco_Folddisco_prefilter.tsv
query/M-CSA/single/M0030.txt	e_coli_filtered_folddisco	12	--covered-node-ratio 0.75 --rmsd 2.0	Folddisco	0.028	2	result/M0030_e_coli_filtered_folddisco_Folddisco.tsv
query/M-CSA/single/M0030.txt	e_coli_filtered_folddisco	12	--covered-node-ratio 0.75 --skip-match	Folddisco_prefilter	0.018	2	result/M0030_e_coli_filtered_folddisco_Folddisco_prefilter.tsv
query/M-CSA/single/M0031.txt	e_coli_filtered_folddisco	12	--covered-node-ratio 0.75 --rmsd 2.0	Folddisco	0.027	1	result/M0031_e_coli_filtered_folddisco_Folddisco.tsv
query/M-CSA/single/M0031.txt	e_coli_filtered_folddisco	12	--covered-node-ratio 0.75 --skip-match	Folddisco_prefilter	0.013	2	result/M0031_e_coli_filtered_folddisco_Folddisco_prefilter.tsv
query/M-CSA/single/M0032.txt	e_coli_filtered_folddisco	12	--covered-node-ratio 0.75 --rmsd 2.0	Folddisco	0.024	4	result/M0032_e_coli_filtered_folddisco_Folddisco.tsv
query/M-CSA/single/M0032.txt	e_coli_filtered_folddisco	12	--covered-node-ratio 0.75 --skip-match	Folddisco_prefilter	0.012	2	result/M0032_e_coli_filtered_folddisco_Folddisco_prefilter.tsv
query/M-CSA/single/M0033.txt	e_coli_filtered_folddisco	12	--covered-node-ratio 0.75 --rmsd 2.0	Folddisco	0.023	2	result/M0033_e_coli_filtered_folddisco_Folddisco.tsv
query/M-CSA/single/M0033.txt	e_coli_filtered_folddisco	12	--covered-node-ratio 0.75 --skip-match	Folddisco_prefilter	0.013	1	result/M0033_e_coli_filtered_folddisco_Folddisco_prefilter.tsv
query/M-CSA/single/M0034.txt	e_coli_filtered_folddisco	12	--covered-node-ratio 0.75 --rmsd 2.0	Folddisco	0.019	0	result/M0034_e_coli_filtered_folddisco_Folddisco.tsv
query/M-CSA/single/M0034.txt	e_coli_filtered_folddisco	12	--covered-node-ratio 0.75 --skip-match	Folddisco_prefilter	0.015	0	result/M0034_e_coli_filtered_folddisco_Folddisco_prefilter.tsv
query/M-CSA/single/M0035.txt	e_coli_filtered_folddisco	12	--covered-node-ratio 0.75 --rmsd 2.0	Folddisco	0.028	4	result/M0035_e_coli_filtered_folddisco_Folddisco.tsv
query/M-CSA/single/M0035.txt	e_coli_filtered_folddisco	12	--covered-node-ratio 0.75 --skip-match	Folddisco_prefilter	0.012	2	result/M0035_e_coli_filtered_folddisco_Folddisco_prefilter.tsv
query/M-CSA/single/M0036.txt	e_coli_filtered_folddisco	12	--covered-node-ratio 0.75 --rmsd 2.0	Folddisco	0.088	0	result/M0036_e_coli_filtered_folddisco_Folddisco.tsv
query/M-CSA/single/M0036.txt	e_coli_filtered_folddisco	12	--covered-node-ratio 0.75 --skip-match	Folddisco_prefilter	0.019	6	result/M0036_e_coli_filtered_folddisco_Folddisco_prefilter.tsv
query/M-CSA/single/M0037.txt	e_coli_filtered_folddisco	12	--covered-node-ratio 0.75 --rmsd 2.0	Folddisco	0.088	28	result/M0037_e_coli_filtered_folddisco_Folddisco.tsv
query/M-CSA/single/M0037.txt	e_coli_filtered_folddisco	12	--covered-node-ratio 0.75 --skip-match	Folddisco_prefilter	0.028	25	result/M0037_e_coli_filtered_folddisco_Folddisco_prefilter.tsv
query/M-CSA/single/M0038.txt	e_coli_filtered_folddisco	12	--covered-node-ratio 0.75 --rmsd 2.0	Folddisco	0.034	1	result/M0038_e_coli_filtered_folddisco_Folddisco.tsv
query/M-CSA/single/M0038.txt	e_coli_filtered_folddisco	12	--covered-node-ratio 0.75 --skip-match	Folddisco_prefilter	0.028	1	result/M0038_e_coli_filtered_folddisco_Folddisco_prefilter.tsv
query/M-CSA/single/M0039.txt	e_coli_filtered_folddisco	12	--covered-node-ratio 0.75 --rmsd 2.0	Folddisco	0.04	5	result/M0039_e_coli_filtered_folddisco_Folddisco.tsv
query/M-CSA/single/M0039.txt	e_coli_filtered_folddisco	12	--covered-node-ratio 0.75 --skip-match	Folddisco_prefilter	0.021	7	result/M0039_e_coli_filtered_folddisco_Folddisco_prefilter.tsv
query/M-CSA/single/M0040.txt	e_coli_filtered_folddisco	12	--covered-node-ratio 0.75 --rmsd 2.0	Folddisco	0.047	15	result/M0040_e_coli_filtered_folddisco_Folddisco.tsv
query/M-CSA/single/M0040.txt	e_coli_filtered_folddisco	12	--covered-node-ratio 0.75 --skip-match	Folddisco_prefilter	0.02	8	result/M0040_e_coli_filtered_folddisco_Folddisco_prefilter.tsv
query/M-CSA/single/M0041.txt	e_coli_filtered_folddisco	12	--covered-node-ratio 0.75 --rmsd 2.0	Folddisco	0.018	0	result/M0041_e_coli_filtered_folddisco_Folddisco.tsv
query/M-CSA/single/M0041.txt	e_coli_filtered_folddisco	12	--covered-node-ratio 0.75 --skip-match	Folddisco_prefilter	0.014	0	result/M0041_e_coli_filtered_folddisco_Folddisco_prefilter.tsv
query/M-CSA/single/M0042.txt	e_coli_filtered_folddisco	12	--covered-node-ratio 0.75 --rmsd 2.0	Folddisco	0.029	7	result/M0042_e_coli_filtered_folddisco_Folddisco.tsv
query/M-CSA/single/M0042.txt	e_coli_filtered_folddisco	12	--covered-node-ratio 0.75 --skip-match	Folddisco_prefilter	0.015	3	result/M0042_e_coli_filtered_folddisco_Folddisco_prefilter.tsv
query/M-CSA/single/M0043.txt	e_coli_filtered_folddisco	12	--covered-node-ratio 0.75 --rmsd 2.0	Folddisco	0.032	0	result/M0043_e_coli_filtered_folddisco_Folddisco.tsv
query/M-CSA/single/M0043.txt	e_coli_filtered_folddisco	12	--covered-node-ratio 0.75 --skip-match	Folddisco_prefilter	0.023	2	result/M0043_e_coli_filtered_folddisco_Folddisco_prefilter.tsv
query/M-CSA/single/M0044.txt	e_coli_filtered_folddisco	12	--covered-node-ratio 0.75 --rmsd 2.0	Folddisco	0.045	1	result/M0044_e_coli_filtered_folddisco_Folddisco.tsv
query/M-CSA/single/M0044.txt	e_coli_filtered_folddisco	12	--covered-node-ratio 0.75 --skip-match	Folddisco_prefilter	0.02	4	result/M0044_e_coli_filtered_folddisco_Folddisco_prefilter.tsv
query/M-CSA/single/M0045.txt	e_coli_filtered_folddisco	12	--covered-node-ratio 0.75 --rmsd 2.0	Folddisco	0.069	69	result/M0045_e_coli_filtered_folddisco_Folddisco.tsv
query/M-CSA/single/M0045.txt	e_coli_filtered_folddisco	12	--covered-node-ratio 0.75 --skip-match	Folddisco_prefilter	0.015	45	result/M0045_e_coli_filtered_folddisco_Folddisco_prefilter.tsv
query/M-CSA/single/M0046.txt	e_coli_filtered_folddisco	12	--covered-node-ratio 0.75 --rmsd 2.0	Folddisco	0.041	32	result/M0046_e_coli_filtered_folddisco_Folddisco.tsv
query/M-CSA/single/M0046.txt	e_coli_filtered_folddisco	12	--covered-node-ratio 0.75 --skip-match	Folddisco_prefilter	0.017	16	result/M0046_e_coli_filtered_folddisco_Folddisco_prefilter.tsv
query/M-CSA/single/M0047.txt	e_coli_filtered_folddisco	12	--covered-node-ratio 0.75 --rmsd 2.0	Folddisco	0.022	0	result/M0047_e_coli_filtered_folddisco_Folddisco.tsv
query/M-CSA/single/M0047.txt	e_coli_filtered_folddisco	12	--covered-node-ratio 0.75 --skip-match	Folddisco_prefilter	0.015	0	result/M0047_e_coli_filtered_folddisco_Folddisco_prefilter.tsv
query/M-CSA/single/M0048.txt	e_coli_filtered_folddisco	12	--covered-node-ratio 0.75 --rmsd 2.0	Folddisco	0.053	49	result/M0048_e_coli_filtered_folddisco_Folddisco.tsv
query/M-CSA/single/M0048.txt	e_coli_filtered_folddisco	12	--covered-node-ratio 0.75 --skip-match	Folddisco_prefilter	0.02	31	result/M0048_e_coli_filtered_folddisco_Folddisco_prefilter.tsv
query/M-CSA/single/M0049.txt	e_coli_filtered_folddisco	12	--covered-node-ratio 0.75 --rmsd 2.0	Folddisco	0.024	0	result/M0049_e_coli_filtered_folddisco_Folddisco.tsv
query/M-CSA/single/M0049.txt	e_coli_filtered_folddisco	12	--covered-node-ratio 0.75 --skip-match	Folddisco_prefilter	0.019	0	result/M0049_e_coli_filtered_folddisco_Folddisco_prefilter.tsv
query/M-CSA/single/M0050.txt	e_coli_filtered_folddisco	12	--covered-node-ratio 0.75 --rmsd 2.0	Folddisco	0.07	11	result/M0050_e_coli_filtered_folddisco_Folddisco.tsv
query/M-CSA/single/M0050.txt	e_coli_filtered_folddisco	12	--covered-node-ratio 0.75 --skip-match	Folddisco_prefilter	0.017	10	result/M0050_e_coli_filtered_folddisco_Folddisco_prefilter.tsv
query/M-CSA/single/M0051.txt	e_coli_filtered_folddisco	12	--covered-node-ratio 0.75 --rmsd 2.0	Folddisco	0.068	6	result/M0051_e_coli_filtered_folddisco_Folddisco.tsv
query/M-CSA/single/M0051.txt	e_coli_filtered_folddisco	12	--covered-node-ratio 0.75 --skip-match	Folddisco_prefilter	0.016	11	result/M0051_e_coli_filtered_folddisco_Folddisco_prefilter.tsv
query/M-CSA/single/M0052.txt	e_coli_filtered_folddisco	12	--covered-node-ratio 0.75 --rmsd 2.0	Folddisco	0.025	0	result/M0052_e_coli_filtered_folddisco_Folddisco.tsv
query/M-CSA/single/M0052.txt	e_coli_filtered_folddisco	12	--covered-node-ratio 0.75 --skip-match	Folddisco_prefilter	0.015	4	result/M0052_e_coli_filtered_folddisco_Folddisco_prefilter.tsv
query/M-CSA/single/M0053.txt	e_coli_filtered_folddisco	12	--covered-node-ratio 0.75 --rmsd 2.0	Folddisco	0.044	7	result/M0053_e_coli_filtered_folddisco_Folddisco.tsv
query/M-CSA/single/M0053.txt	e_coli_filtered_folddisco	12	--covered-node-ratio 0.75 --skip-match	Folddisco_prefilter	0.016	13	result/M0053_e_coli_filtered_folddisco_Folddisco_prefilter.tsv
query/M-CSA/single/M0054.txt	e_coli_filtered_folddisco	12	--covered-node-ratio 0.75 --rmsd 2.0	Folddisco	0.02	1	result/M0054_e_coli_filtered_folddisco_Folddisco.tsv
query/M-CSA/single/M0054.txt	e_coli_filtered_folddisco	12	--covered-node-ratio 0.75 --skip-match	Folddisco_prefilter	0.013	1	result/M0054_e_coli_filtered_folddisco_Folddisco_prefilter.tsv
query/M-CSA/single/M0055.txt	e_coli_filtered_folddisco	12	--covered-node-ratio 0.75 --rmsd 2.0	Folddisco	0.046	0	result/M0055_e_coli_filtered_folddisco_Folddisco.tsv
query/M-CSA/single/M0055.txt	e_coli_filtered_folddisco	12	--covered-node-ratio 0.75 --skip-match	Folddisco_prefilter	0.022	2	result/M0055_e_coli_filtered_folddisco_Folddisco_prefilter.tsv
query/M-CSA/single/M0056.txt	e_coli_filtered_folddisco	12	--covered-node-ratio 0.75 --rmsd 2.0	Folddisco	0.053	34	result/M0056_e_coli_filtered_folddisco_Folddisco.tsv
query/M-CSA/single/M0056.txt	e_coli_filtered_folddisco	12	--covered-node-ratio 0.75 --skip-match	Folddisco_prefilter	0.017	19	result/M0056_e_coli_filtered_folddisco_Folddisco_prefilter.tsv
query/M-CSA/single/M0057.txt	e_coli_filtered_folddisco	12	--covered-node-ratio 0.75 --rmsd 2.0	Folddisco	0.018	0	result/M0057_e_coli_filtered_folddisco_Folddisco.tsv
query/M-CSA/single/M0057.txt	e_coli_filtered_folddisco	12	--covered-node-ratio 0.75 --skip-match	Folddisco_prefilter	0.016	0	result/M0057_e_coli_filtered_folddisco_Folddisco_prefilter.tsv
query/M-CSA/single/M0058.txt	e_coli_filtered_folddisco	12	--covered-node-ratio 0.75 --rmsd 2.0	Folddisco	0.058	45	result/M0058_e_coli_filtered_folddisco_Folddisco.tsv
query/M-CSA/single/M0058.txt	e_coli_filtered_folddisco	12	--covered-node-ratio 0.75 --skip-match	Folddisco_prefilter	0.014	28	result/M0058_e_coli_filtered_folddisco_Folddisco_prefilter.tsv
query/M-CSA/single/M0059.txt	e_coli_filtered_folddisco	12	--covered-node-ratio 0.75 --rmsd 2.0	Folddisco	0.024	0	result/M0059_e_coli_filtered_folddisco_Folddisco.tsv
query/M-CSA/single/M0059.txt	e_coli_filtered_folddisco	12	--covered-node-ratio 0.75 --skip-match	Folddisco_prefilter	0.019	1	result/M0059_e_coli_filtered_folddisco_Folddisco_prefilter.tsv
query/M-CSA/single/M0060.txt	e_coli_filtered_folddisco	12	--covered-node-ratio 0.75 --rmsd 2.0	Folddisco	0.042	13	result/M0060_e_coli_filtered_folddisco_Folddisco.tsv
query/M-CSA/single/M0060.txt	e_coli_filtered_folddisco	12	--covered-node-ratio 0.75 --skip-match	Folddisco_prefilter	0.016	10	result/M0060_e_coli_filtered_folddisco_Folddisco_prefilter.tsv
query/M-CSA/single/M0061.txt	e_coli_filtered_folddisco	12	--covered-node-ratio 0.75 --rmsd 2.0	Folddisco	0.048	39	result/M0061_e_coli_filtered_folddisco_Folddisco.tsv
query/M-CSA/single/M0061.txt	e_coli_filtered_folddisco	12	--covered-node-ratio 0.75 --skip-match	Folddisco_prefilter	0.013	21	result/M0061_e_coli_filtered_folddisco_Folddisco_prefilter.tsv
query/M-CSA/single/M0062.txt	e_coli_filtered_folddisco	12	--covered-node-ratio 0.75 --rmsd 2.0	Folddisco	0.035	2	result/M0062_e_coli_filtered_folddisco_Folddisco.tsv
query/M-CSA/single/M0062.txt	e_coli_filtered_folddisco	12	--covered-node-ratio 0.75 --skip-match	Folddisco_prefilter	0.026	2	result/M0062_e_coli_filtered_folddisco_Folddisco_prefilter.tsv
query/M-CSA/single/M0063.txt	e_coli_filtered_folddisco	12	--covered-node-ratio 0.75 --rmsd 2.0	Folddisco	0.058	42	result/M0063_e_coli_filtered_folddisco_Folddisco.tsv
query/M-CSA/single/M0063.txt	e_coli_filtered_folddisco	12	--covered-node-ratio 0.75 --skip-match	Folddisco_prefilter	0.018	22	result/M0063_e_coli_filtered_folddisco_Folddisco_prefilter.tsv
query/M-CSA/single/M0064.txt	e_coli_filtered_folddisco	12	--covered-node-ratio 0.75 --rmsd 2.0	Folddisco	0.032	3	result/M0064_e_coli_filtered_folddisco_Folddisco.tsv
query/M-CSA/single/M0064.txt	e_coli_filtered_folddisco	12	--covered-node-ratio 0.75 --skip-match	Folddisco_prefilter	0.018	4	result/M0064_e_coli_filtered_folddisco_Folddisco_prefilter.tsv
query/M-CSA/single/M0065.txt	e_coli_filtered_folddisco	12	--covered-node-ratio 0.75 --rmsd 2.0	Folddisco	0.032	7	result/M0065_e_coli_filtered_folddisco_Folddisco.tsv
query/M-CSA/single/M0065.txt	e_coli_filtered_folddisco	12	--covered-node-ratio 0.75 --skip-match	Folddisco_prefilter	0.015	6	result/M0065_e_coli_filtered_folddisco_Folddisco_prefilter.tsv
query/M-CSA/single/M0066.txt	e_coli_filtered_folddisco	12	--covered-node-ratio 0.75 --rmsd 2.0	Folddisco	0.048	16	result/M0066_e_coli_filtered_folddisco_Folddisco.tsv
query/M-CSA/single/M0066.txt	e_coli_filtered_folddisco	12	--covered-node-ratio 0.75 --skip-match	Folddisco_prefilter	0.016	8	result/M0066_e_coli_filtered_folddisco_Folddisco_prefilter.tsv
query/M-CSA/single/M0067.txt	e_coli_filtered_folddisco	12	--covered-node-ratio 0.75 --rmsd 2.0	Folddisco	0.043	4	result/M0067_e_coli_filtered_folddisco_Folddisco.tsv
query/M-CSA/single/M0067.txt	e_coli_filtered_folddisco	12	--covered-node-ratio 0.75 --skip-match	Folddisco_prefilter	0.012	1	result/M0067_e_coli_filtered_folddisco_Folddisco_prefilter.tsv
query/M-CSA/single/M0068.txt	e_coli_filtered_folddisco	12	--covered-node-ratio 0.75 --rmsd 2.0	Folddisco	0.072	41	result/M0068_e_coli_filtered_folddisco_Folddisco.tsv
query/M-CSA/single/M0068.txt	e_coli_filtered_folddisco	12	--covered-node-ratio 0.75 --skip-match	Folddisco_prefilter	0.02	17	result/M0068_e_coli_filtered_folddisco_Folddisco_prefilter.tsv
query/M-CSA/single/M0069.txt	e_coli_filtered_folddisco	12	--covered-node-ratio 0.75 --rmsd 2.0	Folddisco	0.018	2	result/M0069_e_coli_filtered_folddisco_Folddisco.tsv
query/M-CSA/single/M0069.txt	e_coli_filtered_folddisco	12	--covered-node-ratio 0.75 --skip-match	Folddisco_prefilter	0.012	2	result/M0069_e_coli_filtered_folddisco_Folddisco_prefilter.tsv
query/M-CSA/single/M0070.txt	e_coli_filtered_folddisco	12	--covered-node-ratio 0.75 --rmsd 2.0	Folddisco	0.021	1	result/M0070_e_coli_filtered_folddisco_Folddisco.tsv
query/M-CSA/single/M0070.txt	e_coli_filtered_folddisco	12	--covered-node-ratio 0.75 --skip-match	Folddisco_prefilter	0.013	1	result/M0070_e_coli_filtered_folddisco_Folddisco_prefilter.tsv
query/M-CSA/single/M0071.txt	e_coli_filtered_folddisco	12	--covered-node-ratio 0.75 --rmsd 2.0	Folddisco	0.021	3	result/M0071_e_coli_filtered_folddisco_Folddisco.tsv
query/M-CSA/single/M0071.txt	e_coli_filtered_folddisco	12	--covered-node-ratio 0.75 --skip-match	Folddisco_prefilter	0.011	2	result/M0071_e_coli_filtered_folddisco_Folddisco_prefilter.tsv
query/M-CSA/single/M0072.txt	e_coli_filtered_folddisco	12	--covered-node-ratio 0.75 --rmsd 2.0	Folddisco	0.015	0	result/M0072_e_coli_filtered_folddisco_Folddisco.tsv
query/M-CSA/single/M0072.txt	e_coli_filtered_folddisco	12	--covered-node-ratio 0.75 --skip-match	Folddisco_prefilter	0.01	0	result/M0072_e_coli_filtered_folddisco_Folddisco_prefilter.tsv
query/M-CSA/single/M0073.txt	e_coli_filtered_folddisco	12	--covered-node-ratio 0.75 --rmsd 2.0	Folddisco	0.033	6	result/M0073_e_coli_filtered_folddisco_Folddisco.tsv
query/M-CSA/single/M0073.txt	e_coli_filtered_folddisco	12	--covered-node-ratio 0.75 --skip-match	Folddisco_prefilter	0.017	5	result/M0073_e_coli_filtered_folddisco_Folddisco_prefilter.tsv
query/M-CSA/single/M0074.txt	e_coli_filtered_folddisco	12	--covered-node-ratio 0.75 --rmsd 2.0	Folddisco	0.085	19	result/M0074_e_coli_filtered_folddisco_Folddisco.tsv
query/M-CSA/single/M0074.txt	e_coli_filtered_folddisco	12	--covered-node-ratio 0.75 --skip-match	Folddisco_prefilter	0.015	59	result/M0074_e_coli_filtered_folddisco_Folddisco_prefilter.tsv
query/M-CSA/single/M0075.txt	e_coli_filtered_folddisco	12	--covered-node-ratio 0.75 --rmsd 2.0	Folddisco	0.065	6	result/M0075_e_coli_filtered_folddisco_Folddisco.tsv
query/M-CSA/single/M0075.txt	e_coli_filtered_folddisco	12	--covered-node-ratio 0.75 --skip-match	Folddisco_prefilter	0.013	7	result/M0075_e_coli_filtered_folddisco_Folddisco_prefilter.tsv
query/M-CSA/single/M0076.txt	e_coli_filtered_folddisco	12	--covered-node-ratio 0.75 --rmsd 2.0	Folddisco	0.029	6	result/M0076_e_coli_filtered_folddisco_Folddisco.tsv
query/M-CSA/single/M0076.txt	e_coli_filtered_folddisco	12	--covered-node-ratio 0.75 --skip-match	Folddisco_prefilter	0.013	3	result/M0076_e_coli_filtered_folddisco_Folddisco_prefilter.tsv
query/M-CSA/single/M0077.txt	e_coli_filtered_folddisco	12	--covered-node-ratio 0.75 --rmsd 2.0	Folddisco	0.025	5	result/M0077_e_coli_filtered_folddisco_Folddisco.tsv
query/M-CSA/single/M0077.txt	e_coli_filtered_folddisco	12	--covered-node-ratio 0.75 --skip-match	Folddisco_prefilter	0.013	5	result/M0077_e_coli_filtered_folddisco_Folddisco_prefilter.tsv
query/M-CSA/single/M0078.txt	e_coli_filtered_folddisco	12	--covered-node-ratio 0.75 --rmsd 2.0	Folddisco	0.024	5	result/M0078_e_coli_filtered_folddisco_Folddisco.tsv
query/M-CSA/single/M0078.txt	e_coli_filtered_folddisco	12	--covered-node-ratio 0.75 --skip-match	Folddisco_prefilter	0.012	3	result/M0078_e_coli_filtered_folddisco_Folddisco_prefilter.tsv
query/M-CSA/single/M0079.txt	e_coli_filtered_folddisco	12	--covered-node-ratio 0.75 --rmsd 2.0	Folddisco	0.02	3	result/M0079_e_coli_filtered_folddisco_Folddisco.tsv
query/M-CSA/single/M0079.txt	e_coli_filtered_folddisco	12	--covered-node-ratio 0.75 --skip-match	Folddisco_prefilter	0.01	3	result/M0079_e_coli_filtered_folddisco_Folddisco_prefilter.tsv
query/M-CSA/single/M0080.txt	e_coli_filtered_folddisco	12	--covered-node-ratio 0.75 --rmsd 2.0	Folddisco	0.019	0	result/M0080_e_coli_filtered_folddisco_Folddisco.tsv
query/M-CSA/single/M0080.txt	e_coli_filtered_folddisco	12	--covered-node-ratio 0.75 --skip-match	Folddisco_prefilter	0.016	0	result/M0080_e_coli_filtered_folddisco_Folddisco_prefilter.tsv
query/M-CSA/single/M0081.txt	e_coli_filtered_folddisco	12	--covered-node-ratio 0.75 --rmsd 2.0	Folddisco	0.047	3	result/M0081_e_coli_filtered_folddisco_Folddisco.tsv
query/M-CSA/single/M0081.txt	e_coli_filtered_folddisco	12	--covered-node-ratio 0.75 --skip-match	Folddisco_prefilter	0.015	6	result/M0081_e_coli_filtered_folddisco_Folddisco_prefilter.tsv
query/M-CSA/single/M0082.txt	e_coli_filtered_folddisco	12	--covered-node-ratio 0.75 --rmsd 2.0	Folddisco	0.043	0	result/M0082_e_coli_filtered_folddisco_Folddisco.tsv
query/M-CSA/single/M0082.txt	e_coli_filtered_folddisco	12	--covered-node-ratio 0.75 --skip-match	Folddisco_prefilter	0.021	1	result/M0082_e_coli_filtered_folddisco_Folddisco_prefilter.tsv
query/M-CSA/single/M0083.txt	e_coli_filtered_folddisco	12	--covered-node-ratio 0.75 --rmsd 2.0	Folddisco	0.081	6	result/M0083_e_coli_filtered_folddisco_Folddisco.tsv
query/M-CSA/single/M0083.txt	e_coli_filtered_folddisco	12	--covered-node-ratio 0.75 --skip-match	Folddisco_prefilter	0.016	23	result/M0083_e_coli_filtered_folddisco_Folddisco_prefilter.tsv
query/M-CSA/single/M0084.txt	e_coli_filtered_folddisco	12	--covered-node-ratio 0.75 --rmsd 2.0	Folddisco	0.018	2	result/M0084_e_coli_filtered_folddisco_Folddisco.tsv
query/M-CSA/single/M0084.txt	e_coli_filtered_folddisco	12	--covered-node-ratio 0.75 --skip-match	Folddisco_prefilter	0.012	1	result/M0084_e_coli_filtered_folddisco_Folddisco_prefilter.tsv
query/M-CSA/single/M0085.txt	e_coli_filtered_folddisco	12	--covered-node-ratio 0.75 --rmsd 2.0	Folddisco	0.018	0	result/M0085_e_coli_filtered_folddisco_Folddisco.tsv
query/M-CSA/single/M0085.txt	e_coli_filtered_folddisco	12	--covered-node-ratio 0.75 --skip-match	Folddisco_prefilter	0.012	1	result/M0085_e_coli_filtered_folddisco_Folddisco_prefilter.tsv
query/M-CSA/single/M0086.txt	e_coli_filtered_folddisco	12	--covered-node-ratio 0.75 --rmsd 2.0	Folddisco	0.038	0	result/M0086_e_coli_filtered_folddisco_Folddisco.tsv
query/M-CSA/single/M0086.txt	e_coli_filtered_folddisco	12	--covered-node-ratio 0.75 --skip-match	Folddisco_prefilter	0.016	1	result/M0086_e_coli_filtered_folddisco_Folddisco_prefilter.tsv
query/M-CSA/single/M0087.txt	e_coli_filtered_folddisco	12	--covered-node-ratio 0.75 --rmsd 2.0	Folddisco	0.019	0	result/M0087_e_coli_filtered_folddisco_Folddisco.tsv
query/M-CSA/single/M0087.txt	e_coli_filtered_folddisco	12	--covered-node-ratio 0.75 --skip-match	Folddisco_prefilter	0.014	0	result/M0087_e_coli_filtered_folddisco_Folddisco_prefilter.tsv
query/M-CSA/single/M0088.txt	e_coli_filtered_folddisco	12	--covered-node-ratio 0.75 --rmsd 2.0	Folddisco	0.035	3	result/M0088_e_coli_filtered_folddisco_Folddisco.tsv
query/M-CSA/single/M0088.txt	e_coli_filtered_folddisco	12	--covered-node-ratio 0.75 --skip-match	Folddisco_prefilter	0.015	2	result/M0088_e_coli_filtered_folddisco_Folddisco_prefilter.tsv
query/M-CSA/single/M0089.txt	e_coli_filtered_folddisco	12	--covered-node-ratio 0.75 --rmsd 2.0	Folddisco	0.073	0	result/M0089_e_coli_filtered_folddisco_Folddisco.tsv
query/M-CSA/single/M0089.txt	e_coli_filtered_folddisco	12	--covered-node-ratio 0.75 --skip-match	Folddisco_prefilter	0.019	10	result/M0089_e_coli_filtered_folddisco_Folddisco_prefilter.tsv
query/M-CSA/single/M0090.txt	e_coli_filtered_folddisco	12	--covered-node-ratio 0.75 --rmsd 2.0	Folddisco	0.045	0	result/M0090_e_coli_filtered_folddisco_Folddisco.tsv
query/M-CSA/single/M0090.txt	e_coli_filtered_folddisco	12	--covered-node-ratio 0.75 --skip-match	Folddisco_prefilter	0.024	3	result/M0090_e_coli_filtered_folddisco_Folddisco_prefilter.tsv
query/M-CSA/single/M0091.txt	e_coli_filtered_folddisco	12	--covered-node-ratio 0.75 --rmsd 2.0	Folddisco	0.11	383	result/M0091_e_coli_filtered_folddisco_Folddisco.tsv
query/M-CSA/single/M0091.txt	e_coli_filtered_folddisco	12	--covered-node-ratio 0.75 --skip-match	Folddisco_prefilter	0.017	150	result/M0091_e_coli_filtered_folddisco_Folddisco_prefilter.tsv
query/M-CSA/single/M0092.txt	e_coli_filtered_folddisco	12	--covered-node-ratio 0.75 --rmsd 2.0	Folddisco	0.028	4	result/M0092_e_coli_filtered_folddisco_Folddisco.tsv
query/M-CSA/single/M0092.txt	e_coli_filtered_folddisco	12	--covered-node-ratio 0.75 --skip-match	Folddisco_prefilter	0.013	3	result/M0092_e_coli_filtered_folddisco_Folddisco_prefilter.tsv
query/M-CSA/single/M0093.txt	e_coli_filtered_folddisco	12	--covered-node-ratio 0.75 --rmsd 2.0	Folddisco	0.021	0	result/M0093_e_coli_filtered_folddisco_Folddisco.tsv
query/M-CSA/single/M0093.txt	e_coli_filtered_folddisco	12	--covered-node-ratio 0.75 --skip-match	Folddisco_prefilter	0.017	0	result/M0093_e_coli_filtered_folddisco_Folddisco_prefilter.tsv
query/M-CSA/single/M0094.txt	e_coli_filtered_folddisco	12	--covered-node-ratio 0.75 --rmsd 2.0	Folddisco	0.062	12	result/M0094_e_coli_filtered_folddisco_Folddisco.tsv
query/M-CSA/single/M0094.txt	e_coli_filtered_folddisco	12	--covered-node-ratio 0.75 --skip-match	Folddisco_prefilter	0.012	6	result/M0094_e_coli_filtered_folddisco_Folddisco_prefilter.tsv
query/M-CSA/single/M0095.txt	e_coli_filtered_folddisco	12	--covered-node-ratio 0.75 --rmsd 2.0	Folddisco	0.033	5	result/M0095_e_coli_filtered_folddisco_Folddisco.tsv
query/M-CSA/single/M0095.txt	e_coli_filtered_folddisco	12	--covered-node-ratio 0.75 --skip-match	Folddisco_prefilter	0.022	3	result/M0095_e_coli_filtered_folddisco_Folddisco_prefilter.tsv
query/M-CSA/single/M0096.txt	e_coli_filtered_folddisco	12	--covered-node-ratio 0.75 --rmsd 2.0	Folddisco	0.017	0	result/M0096_e_coli_filtered_folddisco_Folddisco.tsv
query/M-CSA/single/M0096.txt	e_coli_filtered_folddisco	12	--covered-node-ratio 0.75 --skip-match	Folddisco_prefilter	0.014	0	result/M0096_e_coli_filtered_folddisco_Folddisco_prefilter.tsv
query/M-CSA/single/M0097.txt	e_coli_filtered_folddisco	12	--covered-node-ratio 0.75 --rmsd 2.0	Folddisco	0.019	5	result/M0097_e_coli_filtered_folddisco_Folddisco.tsv
query/M-CSA/single/M0097.txt	e_coli_filtered_folddisco	12	--covered-node-ratio 0.75 --skip-match	Folddisco_prefilter	0.012	4	result/M0097_e_coli_filtered_folddisco_Folddisco_prefilter.tsv
query/M-CSA/single/M0098.txt	e_coli_filtered_folddisco	12	--covered-node-ratio 0.75 --rmsd 2.0	Folddisco	0.028	5	result/M0098_e_coli_filtered_folddisco_Folddisco.tsv
query/M-CSA/single/M0098.txt	e_coli_filtered_folddisco	12	--covered-node-ratio 0.75 --skip-match	Folddisco_prefilter	0.014	3	result/M0098_e_coli_filtered_folddisco_Folddisco_prefilter.tsv
query/M-CSA/single/M0099.txt	e_coli_filtered_folddisco	12	--covered-node-ratio 0.75 --rmsd 2.0	Folddisco	0.031	4	result/M0099_e_coli_filtered_folddisco_Folddisco.tsv
query/M-CSA/single/M0099.txt	e_coli_filtered_folddisco	12	--covered-node-ratio 0.75 --skip-match	Folddisco_prefilter	0.014	2	result/M0099_e_coli_filtered_folddisco_Folddisco_prefilter.tsv
query/M-CSA/single/M0100.txt	e_coli_filtered_folddisco	12	--covered-node-ratio 0.75 --rmsd 2.0	Folddisco	0.04	15	result/M0100_e_coli_filtered_folddisco_Folddisco.tsv
query/M-CSA/single/M0100.txt	e_coli_filtered_folddisco	12	--covered-node-ratio 0.75 --skip-match	Folddisco_prefilter	0.021	11	result/M0100_e_coli_filtered_folddisco_Folddisco_prefilter.tsv
query/M-CSA/single/M0101.txt	e_coli_filtered_folddisco	12	--covered-node-ratio 0.75 --rmsd 2.0	Folddisco	0.019	4	result/M0101_e_coli_filtered_folddisco_Folddisco.tsv
query/M-CSA/single/M0101.txt	e_coli_filtered_folddisco	12	--covered-node-ratio 0.75 --skip-match	Folddisco_prefilter	0.011	2	result/M0101_e_coli_filtered_folddisco_Folddisco_prefilter.tsv
query/M-CSA/single/M0102.txt	e_coli_filtered_folddisco	12	--covered-node-ratio 0.75 --rmsd 2.0	Folddisco	0.021	1	result/M0102_e_coli_filtered_folddisco_Folddisco.tsv
query/M-CSA/single/M0102.txt	e_coli_filtered_folddisco	12	--covered-node-ratio 0.75 --skip-match	Folddisco_prefilter	0.015	1	result/M0102_e_coli_filtered_folddisco_Folddisco_prefilter.tsv
query/M-CSA/single/M0103.txt	e_coli_filtered_folddisco	12	--covered-node-ratio 0.75 --rmsd 2.0	Folddisco	0.05	8	result/M0103_e_coli_filtered_folddisco_Folddisco.tsv
query/M-CSA/single/M0103.txt	e_coli_filtered_folddisco	12	--covered-node-ratio 0.75 --skip-match	Folddisco_prefilter	0.017	7	result/M0103_e_coli_filtered_folddisco_Folddisco_prefilter.tsv
query/M-CSA/single/M0104.txt	e_coli_filtered_folddisco	12	--covered-node-ratio 0.75 --rmsd 2.0	Folddisco	0.02	0	result/M0104_e_coli_filtered_folddisco_Folddisco.tsv
query/M-CSA/single/M0104.txt	e_coli_filtered_folddisco	12	--covered-node-ratio 0.75 --skip-match	Folddisco_prefilter	0.017	0	result/M0104_e_coli_filtered_folddisco_Folddisco_prefilter.tsv
query/M-CSA/single/M0106.txt	e_coli_filtered_folddisco	12	--covered-node-ratio 0.75 --rmsd 2.0	Folddisco	0.029	0	result/M0106_e_coli_filtered_folddisco_Folddisco.tsv
query/M-CSA/single/M0106.txt	e_coli_filtered_folddisco	12	--covered-node-ratio 0.75 --skip-match	Folddisco_prefilter	0.025	0	result/M0106_e_coli_filtered_folddisco_Folddisco_prefilter.tsv
query/M-CSA/single/M0107.txt	e_coli_filtered_folddisco	12	--covered-node-ratio 0.75 --rmsd 2.0	Folddisco	0.04	11	result/M0107_e_coli_filtered_folddisco_Folddisco.tsv
query/M-CSA/single/M0107.txt	e_coli_filtered_folddisco	12	--covered-node-ratio 0.75 --skip-match	Folddisco_prefilter	0.023	6	result/M0107_e_coli_filtered_folddisco_Folddisco_prefilter.tsv
query/M-CSA/single/M0108.txt	e_coli_filtered_folddisco	12	--covered-node-ratio 0.75 --rmsd 2.0	Folddisco	0.038	14	result/M0108_e_coli_filtered_folddisco_Folddisco.tsv
query/M-CSA/single/M0108.txt	e_coli_filtered_folddisco	12	--covered-node-ratio 0.75 --skip-match	Folddisco_prefilter	0.015	7	result/M0108_e_coli_filtered_folddisco_Folddisco_prefilter.tsv
query/M-CSA/single/M0109.txt	e_coli_filtered_folddisco	12	--covered-node-ratio 0.75 --rmsd 2.0	Folddisco	0.081	4	result/M0109_e_coli_filtered_folddisco_Folddisco.tsv
query/M-CSA/single/M0109.txt	e_coli_filtered_folddisco	12	--covered-node-ratio 0.75 --skip-match	Folddisco_prefilter	0.017	7	result/M0109_e_coli_filtered_folddisco_Folddisco_prefilter.tsv
query/M-CSA/single/M0110.txt	e_coli_filtered_folddisco	12	--covered-node-ratio 0.75 --rmsd 2.0	Folddisco	0.017	0	result/M0110_e_coli_filtered_folddisco_Folddisco.tsv
query/M-CSA/single/M0110.txt	e_coli_filtered_folddisco	12	--covered-node-ratio 0.75 --skip-match	Folddisco_prefilter	0.012	0	result/M0110_e_coli_filtered_folddisco_Folddisco_prefilter.tsv
query/M-CSA/single/M0111.txt	e_coli_filtered_folddisco	12	--covered-node-ratio 0.75 --rmsd 2.0	Folddisco	0.051	4	result/M0111_e_coli_filtered_folddisco_Folddisco.tsv
query/M-CSA/single/M0111.txt	e_coli_filtered_folddisco	12	--covered-node-ratio 0.75 --skip-match	Folddisco_prefilter	0.027	1	result/M0111_e_coli_filtered_folddisco_Folddisco_prefilter.tsv
query/M-CSA/single/M0112.txt	e_coli_filtered_folddisco	12	--covered-node-ratio 0.75 --rmsd 2.0	Folddisco	0.374	0	result/M0112_e_coli_filtered_folddisco_Folddisco.tsv
query/M-CSA/single/M0112.txt	e_coli_filtered_folddisco	12	--covered-node-ratio 0.75 --skip-match	Folddisco_prefilter	0.021	206	result/M0112_e_coli_filtered_folddisco_Folddisco_prefilter.tsv
query/M-CSA/single/M0113.txt	e_coli_filtered_folddisco	12	--covered-node-ratio 0.75 --rmsd 2.0	Folddisco	0.047	2	result/M0113_e_coli_filtered_folddisco_Folddisco.tsv
query/M-CSA/single/M0113.txt	e_coli_filtered_folddisco	12	--covered-node-ratio 0.75 --skip-match	Folddisco_prefilter	0.017	3	result/M0113_e_coli_filtered_folddisco_Folddisco_prefilter.tsv
query/M-CSA/single/M0114.txt	e_coli_filtered_folddisco	12	--covered-node-ratio 0.75 --rmsd 2.0	Folddisco	0.037	4	result/M0114_e_coli_filtered_folddisco_Folddisco.tsv
query/M-CSA/single/M0114.txt	e_coli_filtered_folddisco	12	--covered-node-ratio 0.75 --skip-match	Folddisco_prefilter	0.019	2	result/M0114_e_coli_filtered_folddisco_Folddisco_prefilter.tsv
query/M-CSA/single/M0115.txt	e_coli_filtered_folddisco	12	--covered-node-ratio 0.75 --rmsd 2.0	Folddisco	0.017	0	result/M0115_e_coli_filtered_folddisco_Folddisco.tsv
query/M-CSA/single/M0115.txt	e_coli_filtered_folddisco	12	--covered-node-ratio 0.75 --skip-match	Folddisco_prefilter	0.013	0	result/M0115_e_coli_filtered_folddisco_Folddisco_prefilter.tsv
query/M-CSA/single/M0116.txt	e_coli_filtered_folddisco	12	--covered-node-ratio 0.75 --rmsd 2.0	Folddisco	0.019	0	result/M0116_e_coli_filtered_folddisco_Folddisco.tsv
query/M-CSA/single/M0116.txt	e_coli_filtered_folddisco	12	--covered-node-ratio 0.75 --skip-match	Folddisco_prefilter	0.017	0	result/M0116_e_coli_filtered_folddisco_Folddisco_prefilter.tsv
query/M-CSA/single/M0117.txt	e_coli_filtered_folddisco	12	--covered-node-ratio 0.75 --rmsd 2.0	Folddisco	0.033	3	result/M0117_e_coli_filtered_folddisco_Folddisco.tsv
query/M-CSA/single/M0117.txt	e_coli_filtered_folddisco	12	--covered-node-ratio 0.75 --skip-match	Folddisco_prefilter	0.017	2	result/M0117_e_coli_filtered_folddisco_Folddisco_prefilter.tsv
query/M-CSA/single/M0118.txt	e_coli_filtered_folddisco	12	--covered-node-ratio 0.75 --rmsd 2.0	Folddisco	0.018	0	result/M0118_e_coli_filtered_folddisco_Folddisco.tsv
query/M-CSA/single/M0118.txt	e_coli_filtered_folddisco	12	--covered-node-ratio 0.75 --skip-match	Folddisco_prefilter	0.013	0	result/M0118_e_coli_filtered_folddisco_Folddisco_prefilter.tsv
query/M-CSA/single/M0119.txt	e_coli_filtered_folddisco	12	--covered-node-ratio 0.75 --rmsd 2.0	Folddisco	0.056	14	result/M0119_e_coli_filtered_folddisco_Folddisco.tsv
query/M-CSA/single/M0119.txt	e_coli_filtered_folddisco	12	--covered-node-ratio 0.75 --skip-match	Folddisco_prefilter	0.025	9	result/M0119_e_coli_filtered_folddisco_Folddisco_prefilter.tsv
query/M-CSA/single/M0120.txt	e_coli_filtered_folddisco	12	--covered-node-ratio 0.75 --rmsd 2.0	Folddisco	0.039	11	result/M0120_e_coli_filtered_folddisco_Folddisco.tsv
query/M-CSA/single/M0120.txt	e_coli_filtered_folddisco	12	--covered-node-ratio 0.75 --skip-match	Folddisco_prefilter	0.016	6	result/M0120_e_coli_filtered_folddisco_Folddisco_prefilter.tsv
query/M-CSA/single/M0121.txt	e_coli_filtered_folddisco	12	--covered-node-ratio 0.75 --rmsd 2.0	Folddisco	0.018	0	result/M0121_e_coli_filtered_folddisco_Folddisco.tsv
query/M-CSA/single/M0121.txt	e_coli_filtered_folddisco	12	--covered-node-ratio 0.75 --skip-match	Folddisco_prefilter	0.015	0	result/M0121_e_coli_filtered_folddisco_Folddisco_prefilter.tsv
query/M-CSA/single/M0122.txt	e_coli_filtered_folddisco	12	--covered-node-ratio 0.75 --rmsd 2.0	Folddisco	0.017	0	result/M0122_e_coli_filtered_folddisco_Folddisco.tsv
query/M-CSA/single/M0122.txt	e_coli_filtered_folddisco	12	--covered-node-ratio 0.75 --skip-match	Folddisco_prefilter	0.013	0	result/M0122_e_coli_filtered_folddisco_Folddisco_prefilter.tsv
query/M-CSA/single/M0123.txt	e_coli_filtered_folddisco	12	--covered-node-ratio 0.75 --rmsd 2.0	Folddisco	0.06	8	result/M0123_e_coli_filtered_folddisco_Folddisco.tsv
query/M-CSA/single/M0123.txt	e_coli_filtered_folddisco	12	--covered-node-ratio 0.75 --skip-match	Folddisco_prefilter	0.021	2	result/M0123_e_coli_filtered_folddisco_Folddisco_prefilter.tsv
query/M-CSA/single/M0124.txt	e_coli_filtered_folddisco	12	--covered-node-ratio 0.75 --rmsd 2.0	Folddisco	0.093	0	result/M0124_e_coli_filtered_folddisco_Folddisco.tsv
query/M-CSA/single/M0124.txt	e_coli_filtered_folddisco	12	--covered-node-ratio 0.75 --skip-match	Folddisco_prefilter	0.033	3	result/M0124_e_coli_filtered_folddisco_Folddisco_prefilter.tsv
query/M-CSA/single/M0125.txt	e_coli_filtered_folddisco	12	--covered-node-ratio 0.75 --rmsd 2.0	Folddisco	0.019	0	result/M0125_e_coli_filtered_folddisco_Folddisco.tsv
query/M-CSA/single/M0125.txt	e_coli_filtered_folddisco	12	--covered-node-ratio 0.75 --skip-match	Folddisco_prefilter	0.013	0	result/M0125_e_coli_filtered_folddisco_Folddisco_prefilter.tsv
query/M-CSA/single/M0126.txt	e_coli_filtered_folddisco	12	--covered-node-ratio 0.75 --rmsd 2.0	Folddisco	0.057	2	result/M0126_e_coli_filtered_folddisco_Folddisco.tsv
query/M-CSA/single/M0126.txt	e_coli_filtered_folddisco	12	--covered-node-ratio 0.75 --skip-match	Folddisco_prefilter	0.036	2	result/M0126_e_coli_filtered_folddisco_Folddisco_prefilter.tsv
query/M-CSA/single/M0127.txt	e_coli_filtered_folddisco	12	--covered-node-ratio 0.75 --rmsd 2.0	Folddisco	0.019	0	result/M0127_e_coli_filtered_folddisco_Folddisco.tsv
query/M-CSA/single/M0127.txt	e_coli_filtered_folddisco	12	--covered-node-ratio 0.75 --skip-match	Folddisco_prefilter	0.015	0	result/M0127_e_coli_filtered_folddisco_Folddisco_prefilter.tsv
query/M-CSA/single/M0128.txt	e_coli_filtered_folddisco	12	--covered-node-ratio 0.75 --rmsd 2.0	Folddisco	0.016	0	result/M0128_e_coli_filtered_folddisco_Folddisco.tsv
query/M-CSA/single/M0128.txt	e_coli_filtered_folddisco	12	--covered-node-ratio 0.75 --skip-match	Folddisco_prefilter	0.012	0	result/M0128_e_coli_filtered_folddisco_Folddisco_prefilter.tsv
query/M-CSA/single/M0129.txt	e_coli_filtered_folddisco	12	--covered-node-ratio 0.75 --rmsd 2.0	Folddisco	0.031	10	result/M0129_e_coli_filtered_folddisco_Folddisco.tsv
query/M-CSA/single/M0129.txt	e_coli_filtered_folddisco	12	--covered-node-ratio 0.75 --skip-match	Folddisco_prefilter	0.015	9	result/M0129_e_coli_filtered_folddisco_Folddisco_prefilter.tsv
query/M-CSA/single/M0130.txt	e_coli_filtered_folddisco	12	--covered-node-ratio 0.75 --rmsd 2.0	Folddisco	0.041	11	result/M0130_e_coli_filtered_folddisco_Folddisco.tsv
query/M-CSA/single/M0130.txt	e_coli_filtered_folddisco	12	--covered-node-ratio 0.75 --skip-match	Folddisco_prefilter	0.018	7	result/M0130_e_coli_filtered_folddisco_Folddisco_prefilter.tsv
query/M-CSA/single/M0131.txt	e_coli_filtered_folddisco	12	--covered-node-ratio 0.75 --rmsd 2.0	Folddisco	0.024	6	result/M0131_e_coli_filtered_folddisco_Folddisco.tsv
query/M-CSA/single/M0131.txt	e_coli_filtered_folddisco	12	--covered-node-ratio 0.75 --skip-match	Folddisco_prefilter	0.012	3	result/M0131_e_coli_filtered_folddisco_Folddisco_prefilter.tsv
query/M-CSA/single/M0132.txt	e_coli_filtered_folddisco	12	--covered-node-ratio 0.75 --rmsd 2.0	Folddisco	0.065	143	result/M0132_e_coli_filtered_folddisco_Folddisco.tsv
query/M-CSA/single/M0132.txt	e_coli_filtered_folddisco	12	--covered-node-ratio 0.75 --skip-match	Folddisco_prefilter	0.015	140	result/M0132_e_coli_filtered_folddisco_Folddisco_prefilter.tsv
query/M-CSA/single/M0133.txt	e_coli_filtered_folddisco	12	--covered-node-ratio 0.75 --rmsd 2.0	Folddisco	0.073	63	result/M0133_e_coli_filtered_folddisco_Folddisco.tsv
query/M-CSA/single/M0133.txt	e_coli_filtered_folddisco	12	--covered-node-ratio 0.75 --skip-match	Folddisco_prefilter	0.017	25	result/M0133_e_coli_filtered_folddisco_Folddisco_prefilter.tsv
query/M-CSA/single/M0134.txt	e_coli_filtered_folddisco	12	--covered-node-ratio 0.75 --rmsd 2.0	Folddisco	0.027	15	result/M0134_e_coli_filtered_folddisco_Folddisco.tsv
query/M-CSA/single/M0134.txt	e_coli_filtered_folddisco	12	--covered-node-ratio 0.75 --skip-match	Folddisco_prefilter	0.012	8	result/M0134_e_coli_filtered_folddisco_Folddisco_prefilter.tsv
query/M-CSA/single/M0135.txt	e_coli_filtered_folddisco	12	--covered-node-ratio 0.75 --rmsd 2.0	Folddisco	0.02	0	result/M0135_e_coli_filtered_folddisco_Folddisco.tsv
query/M-CSA/single/M0135.txt	e_coli_filtered_folddisco	12	--covered-node-ratio 0.75 --skip-match	Folddisco_prefilter	0.014	1	result/M0135_e_coli_filtered_folddisco_Folddisco_prefilter.tsv
query/M-CSA/single/M0136.txt	e_coli_filtered_folddisco	12	--covered-node-ratio 0.75 --rmsd 2.0	Folddisco	0.049	0	result/M0136_e_coli_filtered_folddisco_Folddisco.tsv
query/M-CSA/single/M0136.txt	e_coli_filtered_folddisco	12	--covered-node-ratio 0.75 --skip-match	Folddisco_prefilter	0.026	9	result/M0136_e_coli_filtered_folddisco_Folddisco_prefilter.tsv
query/M-CSA/single/M0138.txt	e_coli_filtered_folddisco	12	--covered-node-ratio 0.75 --rmsd 2.0	Folddisco	0.032	1	result/M0138_e_coli_filtered_folddisco_Folddisco.tsv
query/M-CSA/single/M0138.txt	e_coli_filtered_folddisco	12	--covered-node-ratio 0.75 --skip-match	Folddisco_prefilter	0.012	3	result/M0138_e_coli_filtered_folddisco_Folddisco_prefilter.tsv
query/M-CSA/single/M0139.txt	e_coli_filtered_folddisco	12	--covered-node-ratio 0.75 --rmsd 2.0	Folddisco	0.024	0	result/M0139_e_coli_filtered_folddisco_Folddisco.tsv
query/M-CSA/single/M0139.txt	e_coli_filtered_folddisco	12	--covered-node-ratio 0.75 --skip-match	Folddisco_prefilter	0.024	0	result/M0139_e_coli_filtered_folddisco_Folddisco_prefilter.tsv
query/M-CSA/single/M0140.txt	e_coli_filtered_folddisco	12	--covered-node-ratio 0.75 --rmsd 2.0	Folddisco	0.03	0	result/M0140_e_coli_filtered_folddisco_Folddisco.tsv
query/M-CSA/single/M0140.txt	e_coli_filtered_folddisco	12	--covered-node-ratio 0.75 --skip-match	Folddisco_prefilter	0.024	0	result/M0140_e_coli_filtered_folddisco_Folddisco_prefilter.tsv
query/M-CSA/single/M0141.txt	e_coli_filtered_folddisco	12	--covered-node-ratio 0.75 --rmsd 2.0	Folddisco	0.041	0	result/M0141_e_coli_filtered_folddisco_Folddisco.tsv
query/M-CSA/single/M0141.txt	e_coli_filtered_folddisco	12	--covered-node-ratio 0.75 --skip-match	Folddisco_prefilter	0.02	2	result/M0141_e_coli_filtered_folddisco_Folddisco_prefilter.tsv
query/M-CSA/single/M0142.txt	e_coli_filtered_folddisco	12	--covered-node-ratio 0.75 --rmsd 2.0	Folddisco	0.064	76	result/M0142_e_coli_filtered_folddisco_Folddisco.tsv
query/M-CSA/single/M0142.txt	e_coli_filtered_folddisco	12	--covered-node-ratio 0.75 --skip-match	Folddisco_prefilter	0.017	35	result/M0142_e_coli_filtered_folddisco_Folddisco_prefilter.tsv
query/M-CSA/single/M0143.txt	e_coli_filtered_folddisco	12	--covered-node-ratio 0.75 --rmsd 2.0	Folddisco	0.021	0	result/M0143_e_coli_filtered_folddisco_Folddisco.tsv
query/M-CSA/single/M0143.txt	e_coli_filtered_folddisco	12	--covered-node-ratio 0.75 --skip-match	Folddisco_prefilter	0.019	0	result/M0143_e_coli_filtered_folddisco_Folddisco_prefilter.tsv
query/M-CSA/single/M0144.txt	e_coli_filtered_folddisco	12	--covered-node-ratio 0.75 --rmsd 2.0	Folddisco	0.05	3	result/M0144_e_coli_filtered_folddisco_Folddisco.tsv
query/M-CSA/single/M0144.txt	e_coli_filtered_folddisco	12	--covered-node-ratio 0.75 --skip-match	Folddisco_prefilter	0.026	4	result/M0144_e_coli_filtered_folddisco_Folddisco_prefilter.tsv
query/M-CSA/single/M0145.txt	e_coli_filtered_folddisco	12	--covered-node-ratio 0.75 --rmsd 2.0	Folddisco	0.03	9	result/M0145_e_coli_filtered_folddisco_Folddisco.tsv
query/M-CSA/single/M0145.txt	e_coli_filtered_folddisco	12	--covered-node-ratio 0.75 --skip-match	Folddisco_prefilter	0.013	11	result/M0145_e_coli_filtered_folddisco_Folddisco_prefilter.tsv
query/M-CSA/single/M0146.txt	e_coli_filtered_folddisco	12	--covered-node-ratio 0.75 --rmsd 2.0	Folddisco	0.77	6	result/M0146_e_coli_filtered_folddisco_Folddisco.tsv
query/M-CSA/single/M0146.txt	e_coli_filtered_folddisco	12	--covered-node-ratio 0.75 --skip-match	Folddisco_prefilter	0.724	3	result/M0146_e_coli_filtered_folddisco_Folddisco_prefilter.tsv
query/M-CSA/single/M0147.txt	e_coli_filtered_folddisco	12	--covered-node-ratio 0.75 --rmsd 2.0	Folddisco	0.046	3	result/M0147_e_coli_filtered_folddisco_Folddisco.tsv
query/M-CSA/single/M0147.txt	e_coli_filtered_folddisco	12	--covered-node-ratio 0.75 --skip-match	Folddisco_prefilter	0.021	1	result/M0147_e_coli_filtered_folddisco_Folddisco_prefilter.tsv
query/M-CSA/single/M0148.txt	e_coli_filtered_folddisco	12	--covered-node-ratio 0.75 --rmsd 2.0	Folddisco	0.026	6	result/M0148_e_coli_filtered_folddisco_Folddisco.tsv
query/M-CSA/single/M0148.txt	e_coli_filtered_folddisco	12	--covered-node-ratio 0.75 --skip-match	Folddisco_prefilter	0.014	4	result/M0148_e_coli_filtered_folddisco_Folddisco_prefilter.tsv
query/M-CSA/single/M0149.txt	e_coli_filtered_folddisco	12	--covered-node-ratio 0.75 --rmsd 2.0	Folddisco	0.027	2	result/M0149_e_coli_filtered_folddisco_Folddisco.tsv
query/M-CSA/single/M0149.txt	e_coli_filtered_folddisco	12	--covered-node-ratio 0.75 --skip-match	Folddisco_prefilter	0.019	1	result/M0149_e_coli_filtered_folddisco_Folddisco_prefilter.tsv
query/M-CSA/single/M0150.txt	e_coli_filtered_folddisco	12	--covered-node-ratio 0.75 --rmsd 2.0	Folddisco	0.05	23	result/M0150_e_coli_filtered_folddisco_Folddisco.tsv
query/M-CSA/single/M0150.txt	e_coli_filtered_folddisco	12	--covered-node-ratio 0.75 --skip-match	Folddisco_prefilter	0.013	11	result/M0150_e_coli_filtered_folddisco_Folddisco_prefilter.tsv
query/M-CSA/single/M0151.txt	e_coli_filtered_folddisco	12	--covered-node-ratio 0.75 --rmsd 2.0	Folddisco	0.066	38	result/M0151_e_coli_filtered_folddisco_Folddisco.tsv
query/M-CSA/single/M0151.txt	e_coli_filtered_folddisco	12	--covered-node-ratio 0.75 --skip-match	Folddisco_prefilter	0.013	36	result/M0151_e_coli_filtered_folddisco_Folddisco_prefilter.tsv
query/M-CSA/single/M0152.txt	e_coli_filtered_folddisco	12	--covered-node-ratio 0.75 --rmsd 2.0	Folddisco	0.021	2	result/M0152_e_coli_filtered_folddisco_Folddisco.tsv
query/M-CSA/single/M0152.txt	e_coli_filtered_folddisco	12	--covered-node-ratio 0.75 --skip-match	Folddisco_prefilter	0.014	1	result/M0152_e_coli_filtered_folddisco_Folddisco_prefilter.tsv
query/M-CSA/single/M0153.txt	e_coli_filtered_folddisco	12	--covered-node-ratio 0.75 --rmsd 2.0	Folddisco	0.101	85	result/M0153_e_coli_filtered_folddisco_Folddisco.tsv
query/M-CSA/single/M0153.txt	e_coli_filtered_folddisco	12	--covered-node-ratio 0.75 --skip-match	Folddisco_prefilter	0.019	35	result/M0153_e_coli_filtered_folddisco_Folddisco_prefilter.tsv
query/M-CSA/single/M0154.txt	e_coli_filtered_folddisco	12	--covered-node-ratio 0.75 --rmsd 2.0	Folddisco	0.019	0	result/M0154_e_coli_filtered_folddisco_Folddisco.tsv
query/M-CSA/single/M0154.txt	e_coli_filtered_folddisco	12	--covered-node-ratio 0.75 --skip-match	Folddisco_prefilter	0.017	0	result/M0154_e_coli_filtered_folddisco_Folddisco_prefilter.tsv
query/M-CSA/single/M0155.txt	e_coli_filtered_folddisco	12	--covered-node-ratio 0.75 --rmsd 2.0	Folddisco	0.024	0	result/M0155_e_coli_filtered_folddisco_Folddisco.tsv
query/M-CSA/single/M0155.txt	e_coli_filtered_folddisco	12	--covered-node-ratio 0.75 --skip-match	Folddisco_prefilter	0.015	1	result/M0155_e_coli_filtered_folddisco_Folddisco_prefilter.tsv
query/M-CSA/single/M0156.txt	e_coli_filtered_folddisco	12	--covered-node-ratio 0.75 --rmsd 2.0	Folddisco	0.027	0	result/M0156_e_coli_filtered_folddisco_Folddisco.tsv
query/M-CSA/single/M0156.txt	e_coli_filtered_folddisco	12	--covered-node-ratio 0.75 --skip-match	Folddisco_prefilter	0.023	0	result/M0156_e_coli_filtered_folddisco_Folddisco_prefilter.tsv
query/M-CSA/single/M0157.txt	e_coli_filtered_folddisco	12	--covered-node-ratio 0.75 --rmsd 2.0	Folddisco	0.025	2	result/M0157_e_coli_filtered_folddisco_Folddisco.tsv
query/M-CSA/single/M0157.txt	e_coli_filtered_folddisco	12	--covered-node-ratio 0.75 --skip-match	Folddisco_prefilter	0.014	4	result/M0157_e_coli_filtered_folddisco_Folddisco_prefilter.tsv
query/M-CSA/single/M0158.txt	e_coli_filtered_folddisco	12	--covered-node-ratio 0.75 --rmsd 2.0	Folddisco	0.027	1	result/M0158_e_coli_filtered_folddisco_Folddisco.tsv
query/M-CSA/single/M0158.txt	e_coli_filtered_folddisco	12	--covered-node-ratio 0.75 --skip-match	Folddisco_prefilter	0.015	2	result/M0158_e_coli_filtered_folddisco_Folddisco_prefilter.tsv
query/M-CSA/single/M0159.txt	e_coli_filtered_folddisco	12	--covered-node-ratio 0.75 --rmsd 2.0	Folddisco	0.027	0	result/M0159_e_coli_filtered_folddisco_Folddisco.tsv
query/M-CSA/single/M0159.txt	e_coli_filtered_folddisco	12	--covered-node-ratio 0.75 --skip-match	Folddisco_prefilter	0.016	2	result/M0159_e_coli_filtered_folddisco_Folddisco_prefilter.tsv
query/M-CSA/single/M0160.txt	e_coli_filtered_folddisco	12	--covered-node-ratio 0.75 --rmsd 2.0	Folddisco	0.025	6	result/M0160_e_coli_filtered_folddisco_Folddisco.tsv
query/M-CSA/single/M0160.txt	e_coli_filtered_folddisco	12	--covered-node-ratio 0.75 --skip-match	Folddisco_prefilter	0.014	5	result/M0160_e_coli_filtered_folddisco_Folddisco_prefilter.tsv
query/M-CSA/single/M0161.txt	e_coli_filtered_folddisco	12	--covered-node-ratio 0.75 --rmsd 2.0	Folddisco	0.021	0	result/M0161_e_coli_filtered_folddisco_Folddisco.tsv
query/M-CSA/single/M0161.txt	e_coli_filtered_folddisco	12	--covered-node-ratio 0.75 --skip-match	Folddisco_prefilter	0.013	2	result/M0161_e_coli_filtered_folddisco_Folddisco_prefilter.tsv
query/M-CSA/single/M0162.txt	e_coli_filtered_folddisco	12	--covered-node-ratio 0.75 --rmsd 2.0	Folddisco	0.082	269	result/M0162_e_coli_filtered_folddisco_Folddisco.tsv
query/M-CSA/single/M0162.txt	e_coli_filtered_folddisco	12	--covered-node-ratio 0.75 --skip-match	Folddisco_prefilter	0.014	116	result/M0162_e_coli_filtered_folddisco_Folddisco_prefilter.tsv
query/M-CSA/single/M0163.txt	e_coli_filtered_folddisco	12	--covered-node-ratio 0.75 --rmsd 2.0	Folddisco	0.017	1	result/M0163_e_coli_filtered_folddisco_Folddisco.tsv
query/M-CSA/single/M0163.txt	e_coli_filtered_folddisco	12	--covered-node-ratio 0.75 --skip-match	Folddisco_prefilter	0.011	1	result/M0163_e_coli_filtered_folddisco_Folddisco_prefilter.tsv
query/M-CSA/single/M0164.txt	e_coli_filtered_folddisco	12	--covered-node-ratio 0.75 --rmsd 2.0	Folddisco	0.04	25	result/M0164_e_coli_filtered_folddisco_Folddisco.tsv
query/M-CSA/single/M0164.txt	e_coli_filtered_folddisco	12	--covered-node-ratio 0.75 --skip-match	Folddisco_prefilter	0.011	12	result/M0164_e_coli_filtered_folddisco_Folddisco_prefilter.tsv
query/M-CSA/single/M0165.txt	e_coli_filtered_folddisco	12	--covered-node-ratio 0.75 --rmsd 2.0	Folddisco	0.023	4	result/M0165_e_coli_filtered_folddisco_Folddisco.tsv
query/M-CSA/single/M0165.txt	e_coli_filtered_folddisco	12	--covered-node-ratio 0.75 --skip-match	Folddisco_prefilter	0.011	2	result/M0165_e_coli_filtered_folddisco_Folddisco_prefilter.tsv
query/M-CSA/single/M0166.txt	e_coli_filtered_folddisco	12	--covered-node-ratio 0.75 --rmsd 2.0	Folddisco	0.029	2	result/M0166_e_coli_filtered_folddisco_Folddisco.tsv
query/M-CSA/single/M0166.txt	e_coli_filtered_folddisco	12	--covered-node-ratio 0.75 --skip-match	Folddisco_prefilter	0.014	2	result/M0166_e_coli_filtered_folddisco_Folddisco_prefilter.tsv
query/M-CSA/single/M0167.txt	e_coli_filtered_folddisco	12	--covered-node-ratio 0.75 --rmsd 2.0	Folddisco	0.04	27	result/M0167_e_coli_filtered_folddisco_Folddisco.tsv
query/M-CSA/single/M0167.txt	e_coli_filtered_folddisco	12	--covered-node-ratio 0.75 --skip-match	Folddisco_prefilter	0.015	14	result/M0167_e_coli_filtered_folddisco_Folddisco_prefilter.tsv
query/M-CSA/single/M0168.txt	e_coli_filtered_folddisco	12	--covered-node-ratio 0.75 --rmsd 2.0	Folddisco	0.019	0	result/M0168_e_coli_filtered_folddisco_Folddisco.tsv
query/M-CSA/single/M0168.txt	e_coli_filtered_folddisco	12	--covered-node-ratio 0.75 --skip-match	Folddisco_prefilter	0.012	0	result/M0168_e_coli_filtered_folddisco_Folddisco_prefilter.tsv
query/M-CSA/single/M0169.txt	e_coli_filtered_folddisco	12	--covered-node-ratio 0.75 --rmsd 2.0	Folddisco	0.042	6	result/M0169_e_coli_filtered_folddisco_Folddisco.tsv
query/M-CSA/single/M0169.txt	e_coli_filtered_folddisco	12	--covered-node-ratio 0.75 --skip-match	Folddisco_prefilter	0.016	5	result/M0169_e_coli_filtered_folddisco_Folddisco_prefilter.tsv
query/M-CSA/single/M0171.txt	e_coli_filtered_folddisco	12	--covered-node-ratio 0.75 --rmsd 2.0	Folddisco	0.035	14	result/M0171_e_coli_filtered_folddisco_Folddisco.tsv
query/M-CSA/single/M0171.txt	e_coli_filtered_folddisco	12	--covered-node-ratio 0.75 --skip-match	Folddisco_prefilter	0.013	9	result/M0171_e_coli_filtered_folddisco_Folddisco_prefilter.tsv
query/M-CSA/single/M0172.txt	e_coli_filtered_folddisco	12	--covered-node-ratio 0.75 --rmsd 2.0	Folddisco	0.034	3	result/M0172_e_coli_filtered_folddisco_Folddisco.tsv
query/M-CSA/single/M0172.txt	e_coli_filtered_folddisco	12	--covered-node-ratio 0.75 --skip-match	Folddisco_prefilter	0.015	8	result/M0172_e_coli_filtered_folddisco_Folddisco_prefilter.tsv
query/M-CSA/single/M0173.txt	e_coli_filtered_folddisco	12	--covered-node-ratio 0.75 --rmsd 2.0	Folddisco	0.084	133	result/M0173_e_coli_filtered_folddisco_Folddisco.tsv
query/M-CSA/single/M0173.txt	e_coli_filtered_folddisco	12	--covered-node-ratio 0.75 --skip-match	Folddisco_prefilter	0.018	43	result/M0173_e_coli_filtered_folddisco_Folddisco_prefilter.tsv
query/M-CSA/single/M0174.txt	e_coli_filtered_folddisco	12	--covered-node-ratio 0.75 --rmsd 2.0	Folddisco	0.017	0	result/M0174_e_coli_filtered_folddisco_Folddisco.tsv
query/M-CSA/single/M0174.txt	e_coli_filtered_folddisco	12	--covered-node-ratio 0.75 --skip-match	Folddisco_prefilter	0.012	0	result/M0174_e_coli_filtered_folddisco_Folddisco_prefilter.tsv
query/M-CSA/single/M0175.txt	e_coli_filtered_folddisco	12	--covered-node-ratio 0.75 --rmsd 2.0	Folddisco	0.049	32	result/M0175_e_coli_filtered_folddisco_Folddisco.tsv
query/M-CSA/single/M0175.txt	e_coli_filtered_folddisco	12	--covered-node-ratio 0.75 --skip-match	Folddisco_prefilter	0.013	16	result/M0175_e_coli_filtered_folddisco_Folddisco_prefilter.tsv
query/M-CSA/single/M0176.txt	e_coli_filtered_folddisco	12	--covered-node-ratio 0.75 --rmsd 2.0	Folddisco	0.044	0	result/M0176_e_coli_filtered_folddisco_Folddisco.tsv
query/M-CSA/single/M0176.txt	e_coli_filtered_folddisco	12	--covered-node-ratio 0.75 --skip-match	Folddisco_prefilter	0.014	8	result/M0176_e_coli_filtered_folddisco_Folddisco_prefilter.tsv
query/M-CSA/single/M0177.txt	e_coli_filtered_folddisco	12	--covered-node-ratio 0.75 --rmsd 2.0	Folddisco	0.076	15	result/M0177_e_coli_filtered_folddisco_Folddisco.tsv
query/M-CSA/single/M0177.txt	e_coli_filtered_folddisco	12	--covered-node-ratio 0.75 --skip-match	Folddisco_prefilter	0.046	16	result/M0177_e_coli_filtered_folddisco_Folddisco_prefilter.tsv
query/M-CSA/single/M0178.txt	e_coli_filtered_folddisco	12	--covered-node-ratio 0.75 --rmsd 2.0	Folddisco	0.04	6	result/M0178_e_coli_filtered_folddisco_Folddisco.tsv
query/M-CSA/single/M0178.txt	e_coli_filtered_folddisco	12	--covered-node-ratio 0.75 --skip-match	Folddisco_prefilter	0.027	6	result/M0178_e_coli_filtered_folddisco_Folddisco_prefilter.tsv
query/M-CSA/single/M0179.txt	e_coli_filtered_folddisco	12	--covered-node-ratio 0.75 --rmsd 2.0	Folddisco	0.074	51	result/M0179_e_coli_filtered_folddisco_Folddisco.tsv
query/M-CSA/single/M0179.txt	e_coli_filtered_folddisco	12	--covered-node-ratio 0.75 --skip-match	Folddisco_prefilter	0.033	31	result/M0179_e_coli_filtered_folddisco_Folddisco_prefilter.tsv
query/M-CSA/single/M0180.txt	e_coli_filtered_folddisco	12	--covered-node-ratio 0.75 --rmsd 2.0	Folddisco	0.07	0	result/M0180_e_coli_filtered_folddisco_Folddisco.tsv
query/M-CSA/single/M0180.txt	e_coli_filtered_folddisco	12	--covered-node-ratio 0.75 --skip-match	Folddisco_prefilter	0.018	7	result/M0180_e_coli_filtered_folddisco_Folddisco_prefilter.tsv
query/M-CSA/single/M0181.txt	e_coli_filtered_folddisco	12	--covered-node-ratio 0.75 --rmsd 2.0	Folddisco	0.061	8	result/M0181_e_coli_filtered_folddisco_Folddisco.tsv
query/M-CSA/single/M0181.txt	e_coli_filtered_folddisco	12	--covered-node-ratio 0.75 --skip-match	Folddisco_prefilter	0.016	11	result/M0181_e_coli_filtered_folddisco_Folddisco_prefilter.tsv
query/M-CSA/single/M0182.txt	e_coli_filtered_folddisco	12	--covered-node-ratio 0.75 --rmsd 2.0	Folddisco	0.056	1	result/M0182_e_coli_filtered_folddisco_Folddisco.tsv
query/M-CSA/single/M0182.txt	e_coli_filtered_folddisco	12	--covered-node-ratio 0.75 --skip-match	Folddisco_prefilter	0.016	5	result/M0182_e_coli_filtered_folddisco_Folddisco_prefilter.tsv
query/M-CSA/single/M0183.txt	e_coli_filtered_folddisco	12	--covered-node-ratio 0.75 --rmsd 2.0	Folddisco	0.021	1	result/M0183_e_coli_filtered_folddisco_Folddisco.tsv
query/M-CSA/single/M0183.txt	e_coli_filtered_folddisco	12	--covered-node-ratio 0.75 --skip-match	Folddisco_prefilter	0.015	1	result/M0183_e_coli_filtered_folddisco_Folddisco_prefilter.tsv
query/M-CSA/single/M0184.txt	e_coli_filtered_folddisco	12	--covered-node-ratio 0.75 --rmsd 2.0	Folddisco	0.025	6	result/M0184_e_coli_filtered_folddisco_Folddisco.tsv
query/M-CSA/single/M0184.txt	e_coli_filtered_folddisco	12	--covered-node-ratio 0.75 --skip-match	Folddisco_prefilter	0.011	6	result/M0184_e_coli_filtered_folddisco_Folddisco_prefilter.tsv
query/M-CSA/single/M0185.txt	e_coli_filtered_folddisco	12	--covered-node-ratio 0.75 --rmsd 2.0	Folddisco	0.026	5	result/M0185_e_coli_filtered_folddisco_Folddisco.tsv
query/M-CSA/single/M0185.txt	e_coli_filtered_folddisco	12	--covered-node-ratio 0.75 --skip-match	Folddisco_prefilter	0.011	5	result/M0185_e_coli_filtered_folddisco_Folddisco_prefilter.tsv
query/M-CSA/single/M0186.txt	e_coli_filtered_folddisco	12	--covered-node-ratio 0.75 --rmsd 2.0	Folddisco	0.02	0	result/M0186_e_coli_filtered_folddisco_Folddisco.tsv
query/M-CSA/single/M0186.txt	e_coli_filtered_folddisco	12	--covered-node-ratio 0.75 --skip-match	Folddisco_prefilter	0.014	0	result/M0186_e_coli_filtered_folddisco_Folddisco_prefilter.tsv
query/M-CSA/single/M0187.txt	e_coli_filtered_folddisco	12	--covered-node-ratio 0.75 --rmsd 2.0	Folddisco	0.044	0	result/M0187_e_coli_filtered_folddisco_Folddisco.tsv
query/M-CSA/single/M0187.txt	e_coli_filtered_folddisco	12	--covered-node-ratio 0.75 --skip-match	Folddisco_prefilter	0.013	6	result/M0187_e_coli_filtered_folddisco_Folddisco_prefilter.tsv
query/M-CSA/single/M0188.txt	e_coli_filtered_folddisco	12	--covered-node-ratio 0.75 --rmsd 2.0	Folddisco	0.037	23	result/M0188_e_coli_filtered_folddisco_Folddisco.tsv
query/M-CSA/single/M0188.txt	e_coli_filtered_folddisco	12	--covered-node-ratio 0.75 --skip-match	Folddisco_prefilter	0.012	15	result/M0188_e_coli_filtered_folddisco_Folddisco_prefilter.tsv
query/M-CSA/single/M0189.txt	e_coli_filtered_folddisco	12	--covered-node-ratio 0.75 --rmsd 2.0	Folddisco	0.064	0	result/M0189_e_coli_filtered_folddisco_Folddisco.tsv
query/M-CSA/single/M0189.txt	e_coli_filtered_folddisco	12	--covered-node-ratio 0.75 --skip-match	Folddisco_prefilter	0.016	2	result/M0189_e_coli_filtered_folddisco_Folddisco_prefilter.tsv
query/M-CSA/single/M0190.txt	e_coli_filtered_folddisco	12	--covered-node-ratio 0.75 --rmsd 2.0	Folddisco	0.02	1	result/M0190_e_coli_filtered_folddisco_Folddisco.tsv
query/M-CSA/single/M0190.txt	e_coli_filtered_folddisco	12	--covered-node-ratio 0.75 --skip-match	Folddisco_prefilter	0.013	1	result/M0190_e_coli_filtered_folddisco_Folddisco_prefilter.tsv
query/M-CSA/single/M0191.txt	e_coli_filtered_folddisco	12	--covered-node-ratio 0.75 --rmsd 2.0	Folddisco	0.071	254	result/M0191_e_coli_filtered_folddisco_Folddisco.tsv
query/M-CSA/single/M0191.txt	e_coli_filtered_folddisco	12	--covered-node-ratio 0.75 --skip-match	Folddisco_prefilter	0.014	118	result/M0191_e_coli_filtered_folddisco_Folddisco_prefilter.tsv
query/M-CSA/single/M0192.txt	e_coli_filtered_folddisco	12	--covered-node-ratio 0.75 --rmsd 2.0	Folddisco	0.043	10	result/M0192_e_coli_filtered_folddisco_Folddisco.tsv
query/M-CSA/single/M0192.txt	e_coli_filtered_folddisco	12	--covered-node-ratio 0.75 --skip-match	Folddisco_prefilter	0.015	7	result/M0192_e_coli_filtered_folddisco_Folddisco_prefilter.tsv
query/M-CSA/single/M0194.txt	e_coli_filtered_folddisco	12	--covered-node-ratio 0.75 --rmsd 2.0	Folddisco	0.028	3	result/M0194_e_coli_filtered_folddisco_Folddisco.tsv
query/M-CSA/single/M0194.txt	e_coli_filtered_folddisco	12	--covered-node-ratio 0.75 --skip-match	Folddisco_prefilter	0.015	3	result/M0194_e_coli_filtered_folddisco_Folddisco_prefilter.tsv
query/M-CSA/single/M0195.txt	e_coli_filtered_folddisco	12	--covered-node-ratio 0.75 --rmsd 2.0	Folddisco	0.037	8	result/M0195_e_coli_filtered_folddisco_Folddisco.tsv
query/M-CSA/single/M0195.txt	e_coli_filtered_folddisco	12	--covered-node-ratio 0.75 --skip-match	Folddisco_prefilter	0.013	5	result/M0195_e_coli_filtered_folddisco_Folddisco_prefilter.tsv
query/M-CSA/single/M0196.txt	e_coli_filtered_folddisco	12	--covered-node-ratio 0.75 --rmsd 2.0	Folddisco	0.017	0	result/M0196_e_coli_filtered_folddisco_Folddisco.tsv
query/M-CSA/single/M0196.txt	e_coli_filtered_folddisco	12	--covered-node-ratio 0.75 --skip-match	Folddisco_prefilter	0.013	0	result/M0196_e_coli_filtered_folddisco_Folddisco_prefilter.tsv
query/M-CSA/single/M0197.txt	e_coli_filtered_folddisco	12	--covered-node-ratio 0.75 --rmsd 2.0	Folddisco	0.031	1	result/M0197_e_coli_filtered_folddisco_Folddisco.tsv
query/M-CSA/single/M0197.txt	e_coli_filtered_folddisco	12	--covered-node-ratio 0.75 --skip-match	Folddisco_prefilter	0.015	3	result/M0197_e_coli_filtered_folddisco_Folddisco_prefilter.tsv
query/M-CSA/single/M0198.txt	e_coli_filtered_folddisco	12	--covered-node-ratio 0.75 --rmsd 2.0	Folddisco	0.059	16	result/M0198_e_coli_filtered_folddisco_Folddisco.tsv
query/M-CSA/single/M0198.txt	e_coli_filtered_folddisco	12	--covered-node-ratio 0.75 --skip-match	Folddisco_prefilter	0.016	9	result/M0198_e_coli_filtered_folddisco_Folddisco_prefilter.tsv
query/M-CSA/single/M0199.txt	e_coli_filtered_folddisco	12	--covered-node-ratio 0.75 --rmsd 2.0	Folddisco	0.079	14	result/M0199_e_coli_filtered_folddisco_Folddisco.tsv
query/M-CSA/single/M0199.txt	e_coli_filtered_folddisco	12	--covered-node-ratio 0.75 --skip-match	Folddisco_prefilter	0.015	23	result/M0199_e_coli_filtered_folddisco_Folddisco_prefilter.tsv
query/M-CSA/single/M0200.txt	e_coli_filtered_folddisco	12	--covered-node-ratio 0.75 --rmsd 2.0	Folddisco	0.037	7	result/M0200_e_coli_filtered_folddisco_Folddisco.tsv
query/M-CSA/single/M0200.txt	e_coli_filtered_folddisco	12	--covered-node-ratio 0.75 --skip-match	Folddisco_prefilter	0.018	7	result/M0200_e_coli_filtered_folddisco_Folddisco_prefilter.tsv
query/M-CSA/single/M0201.txt	e_coli_filtered_folddisco	12	--covered-node-ratio 0.75 --rmsd 2.0	Folddisco	0.076	192	result/M0201_e_coli_filtered_folddisco_Folddisco.tsv
query/M-CSA/single/M0201.txt	e_coli_filtered_folddisco	12	--covered-node-ratio 0.75 --skip-match	Folddisco_prefilter	0.021	83	result/M0201_e_coli_filtered_folddisco_Folddisco_prefilter.tsv
query/M-CSA/single/M0202.txt	e_coli_filtered_folddisco	12	--covered-node-ratio 0.75 --rmsd 2.0	Folddisco	0.017	0	result/M0202_e_coli_filtered_folddisco_Folddisco.tsv
query/M-CSA/single/M0202.txt	e_coli_filtered_folddisco	12	--covered-node-ratio 0.75 --skip-match	Folddisco_prefilter	0.011	0	result/M0202_e_coli_filtered_folddisco_Folddisco_prefilter.tsv
query/M-CSA/single/M0203.txt	e_coli_filtered_folddisco	12	--covered-node-ratio 0.75 --rmsd 2.0	Folddisco	0.036	10	result/M0203_e_coli_filtered_folddisco_Folddisco.tsv
query/M-CSA/single/M0203.txt	e_coli_filtered_folddisco	12	--covered-node-ratio 0.75 --skip-match	Folddisco_prefilter	0.011	10	result/M0203_e_coli_filtered_folddisco_Folddisco_prefilter.tsv
query/M-CSA/single/M0205.txt	e_coli_filtered_folddisco	12	--covered-node-ratio 0.75 --rmsd 2.0	Folddisco	0.039	5	result/M0205_e_coli_filtered_folddisco_Folddisco.tsv
query/M-CSA/single/M0205.txt	e_coli_filtered_folddisco	12	--covered-node-ratio 0.75 --skip-match	Folddisco_prefilter	0.014	5	result/M0205_e_coli_filtered_folddisco_Folddisco_prefilter.tsv
query/M-CSA/single/M0206.txt	e_coli_filtered_folddisco	12	--covered-node-ratio 0.75 --rmsd 2.0	Folddisco	0.152	4	result/M0206_e_coli_filtered_folddisco_Folddisco.tsv
query/M-CSA/single/M0206.txt	e_coli_filtered_folddisco	12	--covered-node-ratio 0.75 --skip-match	Folddisco_prefilter	0.02	27	result/M0206_e_coli_filtered_folddisco_Folddisco_prefilter.tsv
query/M-CSA/single/M0207.txt	e_coli_filtered_folddisco	12	--covered-node-ratio 0.75 --rmsd 2.0	Folddisco	0.022	0	result/M0207_e_coli_filtered_folddisco_Folddisco.tsv
query/M-CSA/single/M0207.txt	e_coli_filtered_folddisco	12	--covered-node-ratio 0.75 --skip-match	Folddisco_prefilter	0.016	0	result/M0207_e_coli_filtered_folddisco_Folddisco_prefilter.tsv
query/M-CSA/single/M0208.txt	e_coli_filtered_folddisco	12	--covered-node-ratio 0.75 --rmsd 2.0	Folddisco	0.028	0	result/M0208_e_coli_filtered_folddisco_Folddisco.tsv
query/M-CSA/single/M0208.txt	e_coli_filtered_folddisco	12	--covered-node-ratio 0.75 --skip-match	Folddisco_prefilter	0.024	0	result/M0208_e_coli_filtered_folddisco_Folddisco_prefilter.tsv
query/M-CSA/single/M0209.txt	e_coli_filtered_folddisco	12	--covered-node-ratio 0.75 --rmsd 2.0	Folddisco	0.055	49	result/M0209_e_coli_filtered_folddisco_Folddisco.tsv
query/M-CSA/single/M0209.txt	e_coli_filtered_folddisco	12	--covered-node-ratio 0.75 --skip-match	Folddisco_prefilter	0.012	49	result/M0209_e_coli_filtered_folddisco_Folddisco_prefilter.tsv
query/M-CSA/single/M0210.txt	e_coli_filtered_folddisco	12	--covered-node-ratio 0.75 --rmsd 2.0	Folddisco	0.018	2	result/M0210_e_coli_filtered_folddisco_Folddisco.tsv
query/M-CSA/single/M0210.txt	e_coli_filtered_folddisco	12	--covered-node-ratio 0.75 --skip-match	Folddisco_prefilter	0.011	1	result/M0210_e_coli_filtered_folddisco_Folddisco_prefilter.tsv
query/M-CSA/single/M0211.txt	e_coli_filtered_folddisco	12	--covered-node-ratio 0.75 --rmsd 2.0	Folddisco	0.021	5	result/M0211_e_coli_filtered_folddisco_Folddisco.tsv
query/M-CSA/single/M0211.txt	e_coli_filtered_folddisco	12	--covered-node-ratio 0.75 --skip-match	Folddisco_prefilter	0.015	3	result/M0211_e_coli_filtered_folddisco_Folddisco_prefilter.tsv
query/M-CSA/single/M0212.txt	e_coli_filtered_folddisco	12	--covered-node-ratio 0.75 --rmsd 2.0	Folddisco	0.031	0	result/M0212_e_coli_filtered_folddisco_Folddisco.tsv
query/M-CSA/single/M0212.txt	e_coli_filtered_folddisco	12	--covered-node-ratio 0.75 --skip-match	Folddisco_prefilter	0.027	0	result/M0212_e_coli_filtered_folddisco_Folddisco_prefilter.tsv
query/M-CSA/single/M0213.txt	e_coli_filtered_folddisco	12	--covered-node-ratio 0.75 --rmsd 2.0	Folddisco	0.034	4	result/M0213_e_coli_filtered_folddisco_Folddisco.tsv
query/M-CSA/single/M0213.txt	e_coli_filtered_folddisco	12	--covered-node-ratio 0.75 --skip-match	Folddisco_prefilter	0.016	2	result/M0213_e_coli_filtered_folddisco_Folddisco_prefilter.tsv
query/M-CSA/single/M0214.txt	e_coli_filtered_folddisco	12	--covered-node-ratio 0.75 --rmsd 2.0	Folddisco	0.057	24	result/M0214_e_coli_filtered_folddisco_Folddisco.tsv
query/M-CSA/single/M0214.txt	e_coli_filtered_folddisco	12	--covered-node-ratio 0.75 --skip-match	Folddisco_prefilter	0.018	15	result/M0214_e_coli_filtered_folddisco_Folddisco_prefilter.tsv
query/M-CSA/single/M0215.txt	e_coli_filtered_folddisco	12	--covered-node-ratio 0.75 --rmsd 2.0	Folddisco	0.04	6	result/M0215_e_coli_filtered_folddisco_Folddisco.tsv
query/M-CSA/single/M0215.txt	e_coli_filtered_folddisco	12	--covered-node-ratio 0.75 --skip-match	Folddisco_prefilter	0.018	6	result/M0215_e_coli_filtered_folddisco_Folddisco_prefilter.tsv
query/M-CSA/single/M0216.txt	e_coli_filtered_folddisco	12	--covered-node-ratio 0.75 --rmsd 2.0	Folddisco	0.015	0	result/M0216_e_coli_filtered_folddisco_Folddisco.tsv
query/M-CSA/single/M0216.txt	e_coli_filtered_folddisco	12	--covered-node-ratio 0.75 --skip-match	Folddisco_prefilter	0.012	0	result/M0216_e_coli_filtered_folddisco_Folddisco_prefilter.tsv
query/M-CSA/single/M0217.txt	e_coli_filtered_folddisco	12	--covered-node-ratio 0.75 --rmsd 2.0	Folddisco	0.015	0	result/M0217_e_coli_filtered_folddisco_Folddisco.tsv
query/M-CSA/single/M0217.txt	e_coli_filtered_folddisco	12	--covered-node-ratio 0.75 --skip-match	Folddisco_prefilter	0.012	0	result/M0217_e_coli_filtered_folddisco_Folddisco_prefilter.tsv
query/M-CSA/single/M0218.txt	e_coli_filtered_folddisco	12	--covered-node-ratio 0.75 --rmsd 2.0	Folddisco	0.045	15	result/M0218_e_coli_filtered_folddisco_Folddisco.tsv
query/M-CSA/single/M0218.txt	e_coli_filtered_folddisco	12	--covered-node-ratio 0.75 --skip-match	Folddisco_prefilter	0.016	7	result/M0218_e_coli_filtered_folddisco_Folddisco_prefilter.tsv
query/M-CSA/single/M0219.txt	e_coli_filtered_folddisco	12	--covered-node-ratio 0.75 --rmsd 2.0	Folddisco	0.02	0	result/M0219_e_coli_filtered_folddisco_Folddisco.tsv
query/M-CSA/single/M0219.txt	e_coli_filtered_folddisco	12	--covered-node-ratio 0.75 --skip-match	Folddisco_prefilter	0.017	0	result/M0219_e_coli_filtered_folddisco_Folddisco_prefilter.tsv
query/M-CSA/single/M0220.txt	e_coli_filtered_folddisco	12	--covered-node-ratio 0.75 --rmsd 2.0	Folddisco	0.078	9	result/M0220_e_coli_filtered_folddisco_Folddisco.tsv
query/M-CSA/single/M0220.txt	e_coli_filtered_folddisco	12	--covered-node-ratio 0.75 --skip-match	Folddisco_prefilter	0.042	5	result/M0220_e_coli_filtered_folddisco_Folddisco_prefilter.tsv
query/M-CSA/single/M0221.txt	e_coli_filtered_folddisco	12	--covered-node-ratio 0.75 --rmsd 2.0	Folddisco	0.047	16	result/M0221_e_coli_filtered_folddisco_Folddisco.tsv
query/M-CSA/single/M0221.txt	e_coli_filtered_folddisco	12	--covered-node-ratio 0.75 --skip-match	Folddisco_prefilter	0.025	7	result/M0221_e_coli_filtered_folddisco_Folddisco_prefilter.tsv
query/M-CSA/single/M0222.txt	e_coli_filtered_folddisco	12	--covered-node-ratio 0.75 --rmsd 2.0	Folddisco	0.024	0	result/M0222_e_coli_filtered_folddisco_Folddisco.tsv
query/M-CSA/single/M0222.txt	e_coli_filtered_folddisco	12	--covered-node-ratio 0.75 --skip-match	Folddisco_prefilter	0.016	0	result/M0222_e_coli_filtered_folddisco_Folddisco_prefilter.tsv
query/M-CSA/single/M0223.txt	e_coli_filtered_folddisco	12	--covered-node-ratio 0.75 --rmsd 2.0	Folddisco	0.023	0	result/M0223_e_coli_filtered_folddisco_Folddisco.tsv
query/M-CSA/single/M0223.txt	e_coli_filtered_folddisco	12	--covered-node-ratio 0.75 --skip-match	Folddisco_prefilter	0.019	0	result/M0223_e_coli_filtered_folddisco_Folddisco_prefilter.tsv
query/M-CSA/single/M0224.txt	e_coli_filtered_folddisco	12	--covered-node-ratio 0.75 --rmsd 2.0	Folddisco	0.027	10	result/M0224_e_coli_filtered_folddisco_Folddisco.tsv
query/M-CSA/single/M0224.txt	e_coli_filtered_folddisco	12	--covered-node-ratio 0.75 --skip-match	Folddisco_prefilter	0.011	10	result/M0224_e_coli_filtered_folddisco_Folddisco_prefilter.tsv
query/M-CSA/single/M0225.txt	e_coli_filtered_folddisco	12	--covered-node-ratio 0.75 --rmsd 2.0	Folddisco	0.075	87	result/M0225_e_coli_filtered_folddisco_Folddisco.tsv
query/M-CSA/single/M0225.txt	e_coli_filtered_folddisco	12	--covered-node-ratio 0.75 --skip-match	Folddisco_prefilter	0.016	41	result/M0225_e_coli_filtered_folddisco_Folddisco_prefilter.tsv
query/M-CSA/single/M0226.txt	e_coli_filtered_folddisco	12	--covered-node-ratio 0.75 --rmsd 2.0	Folddisco	0.066	139	result/M0226_e_coli_filtered_folddisco_Folddisco.tsv
query/M-CSA/single/M0226.txt	e_coli_filtered_folddisco	12	--covered-node-ratio 0.75 --skip-match	Folddisco_prefilter	0.014	59	result/M0226_e_coli_filtered_folddisco_Folddisco_prefilter.tsv
query/M-CSA/single/M0227.txt	e_coli_filtered_folddisco	12	--covered-node-ratio 0.75 --rmsd 2.0	Folddisco	0.045	13	result/M0227_e_coli_filtered_folddisco_Folddisco.tsv
query/M-CSA/single/M0227.txt	e_coli_filtered_folddisco	12	--covered-node-ratio 0.75 --skip-match	Folddisco_prefilter	0.016	9	result/M0227_e_coli_filtered_folddisco_Folddisco_prefilter.tsv
query/M-CSA/single/M0228.txt	e_coli_filtered_folddisco	12	--covered-node-ratio 0.75 --rmsd 2.0	Folddisco	0.143	618	result/M0228_e_coli_filtered_folddisco_Folddisco.tsv
query/M-CSA/single/M0228.txt	e_coli_filtered_folddisco	12	--covered-node-ratio 0.75 --skip-match	Folddisco_prefilter	0.019	230	result/M0228_e_coli_filtered_folddisco_Folddisco_prefilter.tsv
query/M-CSA/single/M0229.txt	e_coli_filtered_folddisco	12	--covered-node-ratio 0.75 --rmsd 2.0	Folddisco	0.051	0	result/M0229_e_coli_filtered_folddisco_Folddisco.tsv
query/M-CSA/single/M0229.txt	e_coli_filtered_folddisco	12	--covered-node-ratio 0.75 --skip-match	Folddisco_prefilter	0.017	8	result/M0229_e_coli_filtered_folddisco_Folddisco_prefilter.tsv
query/M-CSA/single/M0230.txt	e_coli_filtered_folddisco	12	--covered-node-ratio 0.75 --rmsd 2.0	Folddisco	0.044	18	result/M0230_e_coli_filtered_folddisco_Folddisco.tsv
query/M-CSA/single/M0230.txt	e_coli_filtered_folddisco	12	--covered-node-ratio 0.75 --skip-match	Folddisco_prefilter	0.015	18	result/M0230_e_coli_filtered_folddisco_Folddisco_prefilter.tsv
query/M-CSA/single/M0231.txt	e_coli_filtered_folddisco	12	--covered-node-ratio 0.75 --rmsd 2.0	Folddisco	0.025	0	result/M0231_e_coli_filtered_folddisco_Folddisco.tsv
query/M-CSA/single/M0231.txt	e_coli_filtered_folddisco	12	--covered-node-ratio 0.75 --skip-match	Folddisco_prefilter	0.016	1	result/M0231_e_coli_filtered_folddisco_Folddisco_prefilter.tsv
query/M-CSA/single/M0232.txt	e_coli_filtered_folddisco	12	--covered-node-ratio 0.75 --rmsd 2.0	Folddisco	0.014	0	result/M0232_e_coli_filtered_folddisco_Folddisco.tsv
query/M-CSA/single/M0232.txt	e_coli_filtered_folddisco	12	--covered-node-ratio 0.75 --skip-match	Folddisco_prefilter	0.011	0	result/M0232_e_coli_filtered_folddisco_Folddisco_prefilter.tsv
query/M-CSA/single/M0234.txt	e_coli_filtered_folddisco	12	--covered-node-ratio 0.75 --rmsd 2.0	Folddisco	0.031	2	result/M0234_e_coli_filtered_folddisco_Folddisco.tsv
query/M-CSA/single/M0234.txt	e_coli_filtered_folddisco	12	--covered-node-ratio 0.75 --skip-match	Folddisco_prefilter	0.018	1	result/M0234_e_coli_filtered_folddisco_Folddisco_prefilter.tsv
query/M-CSA/single/M0235.txt	e_coli_filtered_folddisco	12	--covered-node-ratio 0.75 --rmsd 2.0	Folddisco	0.016	0	result/M0235_e_coli_filtered_folddisco_Folddisco.tsv
query/M-CSA/single/M0235.txt	e_coli_filtered_folddisco	12	--covered-node-ratio 0.75 --skip-match	Folddisco_prefilter	0.012	0	result/M0235_e_coli_filtered_folddisco_Folddisco_prefilter.tsv
query/M-CSA/single/M0236.txt	e_coli_filtered_folddisco	12	--covered-node-ratio 0.75 --rmsd 2.0	Folddisco	0.094	17	result/M0236_e_coli_filtered_folddisco_Folddisco.tsv
query/M-CSA/single/M0236.txt	e_coli_filtered_folddisco	12	--covered-node-ratio 0.75 --skip-match	Folddisco_prefilter	0.019	12	result/M0236_e_coli_filtered_folddisco_Folddisco_prefilter.tsv
query/M-CSA/single/M0237.txt	e_coli_filtered_folddisco	12	--covered-node-ratio 0.75 --rmsd 2.0	Folddisco	0.02	0	result/M0237_e_coli_filtered_folddisco_Folddisco.tsv
query/M-CSA/single/M0237.txt	e_coli_filtered_folddisco	12	--covered-node-ratio 0.75 --skip-match	Folddisco_prefilter	0.016	0	result/M0237_e_coli_filtered_folddisco_Folddisco_prefilter.tsv
query/M-CSA/single/M0238.txt	e_coli_filtered_folddisco	12	--covered-node-ratio 0.75 --rmsd 2.0	Folddisco	0.063	27	result/M0238_e_coli_filtered_folddisco_Folddisco.tsv
query/M-CSA/single/M0238.txt	e_coli_filtered_folddisco	12	--covered-node-ratio 0.75 --skip-match	Folddisco_prefilter	0.016	12	result/M0238_e_coli_filtered_folddisco_Folddisco_prefilter.tsv
query/M-CSA/single/M0239.txt	e_coli_filtered_folddisco	12	--covered-node-ratio 0.75 --rmsd 2.0	Folddisco	0.067	59	result/M0239_e_coli_filtered_folddisco_Folddisco.tsv
query/M-CSA/single/M0239.txt	e_coli_filtered_folddisco	12	--covered-node-ratio 0.75 --skip-match	Folddisco_prefilter	0.015	31	result/M0239_e_coli_filtered_folddisco_Folddisco_prefilter.tsv
query/M-CSA/single/M0240.txt	e_coli_filtered_folddisco	12	--covered-node-ratio 0.75 --rmsd 2.0	Folddisco	0.066	32	result/M0240_e_coli_filtered_folddisco_Folddisco.tsv
query/M-CSA/single/M0240.txt	e_coli_filtered_folddisco	12	--covered-node-ratio 0.75 --skip-match	Folddisco_prefilter	0.017	23	result/M0240_e_coli_filtered_folddisco_Folddisco_prefilter.tsv
query/M-CSA/single/M0241.txt	e_coli_filtered_folddisco	12	--covered-node-ratio 0.75 --rmsd 2.0	Folddisco	0.041	6	result/M0241_e_coli_filtered_folddisco_Folddisco.tsv
query/M-CSA/single/M0241.txt	e_coli_filtered_folddisco	12	--covered-node-ratio 0.75 --skip-match	Folddisco_prefilter	0.021	3	result/M0241_e_coli_filtered_folddisco_Folddisco_prefilter.tsv
query/M-CSA/single/M0242.txt	e_coli_filtered_folddisco	12	--covered-node-ratio 0.75 --rmsd 2.0	Folddisco	0.035	4	result/M0242_e_coli_filtered_folddisco_Folddisco.tsv
query/M-CSA/single/M0242.txt	e_coli_filtered_folddisco	12	--covered-node-ratio 0.75 --skip-match	Folddisco_prefilter	0.018	2	result/M0242_e_coli_filtered_folddisco_Folddisco_prefilter.tsv
query/M-CSA/single/M0243.txt	e_coli_filtered_folddisco	12	--covered-node-ratio 0.75 --rmsd 2.0	Folddisco	0.025	1	result/M0243_e_coli_filtered_folddisco_Folddisco.tsv
query/M-CSA/single/M0243.txt	e_coli_filtered_folddisco	12	--covered-node-ratio 0.75 --skip-match	Folddisco_prefilter	0.017	1	result/M0243_e_coli_filtered_folddisco_Folddisco_prefilter.tsv
query/M-CSA/single/M0244.txt	e_coli_filtered_folddisco	12	--covered-node-ratio 0.75 --rmsd 2.0	Folddisco	0.037	20	result/M0244_e_coli_filtered_folddisco_Folddisco.tsv
query/M-CSA/single/M0244.txt	e_coli_filtered_folddisco	12	--covered-node-ratio 0.75 --skip-match	Folddisco_prefilter	0.013	20	result/M0244_e_coli_filtered_folddisco_Folddisco_prefilter.tsv
query/M-CSA/single/M0245.txt	e_coli_filtered_folddisco	12	--covered-node-ratio 0.75 --rmsd 2.0	Folddisco	0.054	60	result/M0245_e_coli_filtered_folddisco_Folddisco.tsv
query/M-CSA/single/M0245.txt	e_coli_filtered_folddisco	12	--covered-node-ratio 0.75 --skip-match	Folddisco_prefilter	0.017	60	result/M0245_e_coli_filtered_folddisco_Folddisco_prefilter.tsv
query/M-CSA/single/M0246.txt	e_coli_filtered_folddisco	12	--covered-node-ratio 0.75 --rmsd 2.0	Folddisco	0.045	49	result/M0246_e_coli_filtered_folddisco_Folddisco.tsv
query/M-CSA/single/M0246.txt	e_coli_filtered_folddisco	12	--covered-node-ratio 0.75 --skip-match	Folddisco_prefilter	0.014	49	result/M0246_e_coli_filtered_folddisco_Folddisco_prefilter.tsv
query/M-CSA/single/M0247.txt	e_coli_filtered_folddisco	12	--covered-node-ratio 0.75 --rmsd 2.0	Folddisco	0.024	0	result/M0247_e_coli_filtered_folddisco_Folddisco.tsv
query/M-CSA/single/M0247.txt	e_coli_filtered_folddisco	12	--covered-node-ratio 0.75 --skip-match	Folddisco_prefilter	0.014	2	result/M0247_e_coli_filtered_folddisco_Folddisco_prefilter.tsv
query/M-CSA/single/M0248.txt	e_coli_filtered_folddisco	12	--covered-node-ratio 0.75 --rmsd 2.0	Folddisco	0.048	39	result/M0248_e_coli_filtered_folddisco_Folddisco.tsv
query/M-CSA/single/M0248.txt	e_coli_filtered_folddisco	12	--covered-node-ratio 0.75 --skip-match	Folddisco_prefilter	0.015	22	result/M0248_e_coli_filtered_folddisco_Folddisco_prefilter.tsv
query/M-CSA/single/M0249.txt	e_coli_filtered_folddisco	12	--covered-node-ratio 0.75 --rmsd 2.0	Folddisco	0.056	9	result/M0249_e_coli_filtered_folddisco_Folddisco.tsv
query/M-CSA/single/M0249.txt	e_coli_filtered_folddisco	12	--covered-node-ratio 0.75 --skip-match	Folddisco_prefilter	0.016	10	result/M0249_e_coli_filtered_folddisco_Folddisco_prefilter.tsv
query/M-CSA/single/M0250.txt	e_coli_filtered_folddisco	12	--covered-node-ratio 0.75 --rmsd 2.0	Folddisco	0.058	48	result/M0250_e_coli_filtered_folddisco_Folddisco.tsv
query/M-CSA/single/M0250.txt	e_coli_filtered_folddisco	12	--covered-node-ratio 0.75 --skip-match	Folddisco_prefilter	0.014	24	result/M0250_e_coli_filtered_folddisco_Folddisco_prefilter.tsv
query/M-CSA/single/M0251.txt	e_coli_filtered_folddisco	12	--covered-node-ratio 0.75 --rmsd 2.0	Folddisco	0.026	10	result/M0251_e_coli_filtered_folddisco_Folddisco.tsv
query/M-CSA/single/M0251.txt	e_coli_filtered_folddisco	12	--covered-node-ratio 0.75 --skip-match	Folddisco_prefilter	0.012	6	result/M0251_e_coli_filtered_folddisco_Folddisco_prefilter.tsv
query/M-CSA/single/M0252.txt	e_coli_filtered_folddisco	12	--covered-node-ratio 0.75 --rmsd 2.0	Folddisco	0.042	1	result/M0252_e_coli_filtered_folddisco_Folddisco.tsv
query/M-CSA/single/M0252.txt	e_coli_filtered_folddisco	12	--covered-node-ratio 0.75 --skip-match	Folddisco_prefilter	0.015	5	result/M0252_e_coli_filtered_folddisco_Folddisco_prefilter.tsv
query/M-CSA/single/M0253.txt	e_coli_filtered_folddisco	12	--covered-node-ratio 0.75 --rmsd 2.0	Folddisco	0.078	0	result/M0253_e_coli_filtered_folddisco_Folddisco.tsv
query/M-CSA/single/M0253.txt	e_coli_filtered_folddisco	12	--covered-node-ratio 0.75 --skip-match	Folddisco_prefilter	0.016	23	result/M0253_e_coli_filtered_folddisco_Folddisco_prefilter.tsv
query/M-CSA/single/M0254.txt	e_coli_filtered_folddisco	12	--covered-node-ratio 0.75 --rmsd 2.0	Folddisco	0.029	0	result/M0254_e_coli_filtered_folddisco_Folddisco.tsv
query/M-CSA/single/M0254.txt	e_coli_filtered_folddisco	12	--covered-node-ratio 0.75 --skip-match	Folddisco_prefilter	0.026	0	result/M0254_e_coli_filtered_folddisco_Folddisco_prefilter.tsv
query/M-CSA/single/M0255.txt	e_coli_filtered_folddisco	12	--covered-node-ratio 0.75 --rmsd 2.0	Folddisco	0.04	34	result/M0255_e_coli_filtered_folddisco_Folddisco.tsv
query/M-CSA/single/M0255.txt	e_coli_filtered_folddisco	12	--covered-node-ratio 0.75 --skip-match	Folddisco_prefilter	0.015	23	result/M0255_e_coli_filtered_folddisco_Folddisco_prefilter.tsv
query/M-CSA/single/M0256.txt	e_coli_filtered_folddisco	12	--covered-node-ratio 0.75 --rmsd 2.0	Folddisco	0.021	3	result/M0256_e_coli_filtered_folddisco_Folddisco.tsv
query/M-CSA/single/M0256.txt	e_coli_filtered_folddisco	12	--covered-node-ratio 0.75 --skip-match	Folddisco_prefilter	0.012	6	result/M0256_e_coli_filtered_folddisco_Folddisco_prefilter.tsv
query/M-CSA/single/M0257.txt	e_coli_filtered_folddisco	12	--covered-node-ratio 0.75 --rmsd 2.0	Folddisco	0.035	0	result/M0257_e_coli_filtered_folddisco_Folddisco.tsv
query/M-CSA/single/M0257.txt	e_coli_filtered_folddisco	12	--covered-node-ratio 0.75 --skip-match	Folddisco_prefilter	0.015	3	result/M0257_e_coli_filtered_folddisco_Folddisco_prefilter.tsv
query/M-CSA/single/M0258.txt	e_coli_filtered_folddisco	12	--covered-node-ratio 0.75 --rmsd 2.0	Folddisco	0.016	0	result/M0258_e_coli_filtered_folddisco_Folddisco.tsv
query/M-CSA/single/M0258.txt	e_coli_filtered_folddisco	12	--covered-node-ratio 0.75 --skip-match	Folddisco_prefilter	0.011	0	result/M0258_e_coli_filtered_folddisco_Folddisco_prefilter.tsv
query/M-CSA/single/M0259.txt	e_coli_filtered_folddisco	12	--covered-node-ratio 0.75 --rmsd 2.0	Folddisco	0.036	8	result/M0259_e_coli_filtered_folddisco_Folddisco.tsv
query/M-CSA/single/M0259.txt	e_coli_filtered_folddisco	12	--covered-node-ratio 0.75 --skip-match	Folddisco_prefilter	0.016	5	result/M0259_e_coli_filtered_folddisco_Folddisco_prefilter.tsv
query/M-CSA/single/M0260.txt	e_coli_filtered_folddisco	12	--covered-node-ratio 0.75 --rmsd 2.0	Folddisco	0.054	2	result/M0260_e_coli_filtered_folddisco_Folddisco.tsv
query/M-CSA/single/M0260.txt	e_coli_filtered_folddisco	12	--covered-node-ratio 0.75 --skip-match	Folddisco_prefilter	0.015	33	result/M0260_e_coli_filtered_folddisco_Folddisco_prefilter.tsv
query/M-CSA/single/M0261.txt	e_coli_filtered_folddisco	12	--covered-node-ratio 0.75 --rmsd 2.0	Folddisco	0.021	2	result/M0261_e_coli_filtered_folddisco_Folddisco.tsv
query/M-CSA/single/M0261.txt	e_coli_filtered_folddisco	12	--covered-node-ratio 0.75 --skip-match	Folddisco_prefilter	0.012	1	result/M0261_e_coli_filtered_folddisco_Folddisco_prefilter.tsv
query/M-CSA/single/M0262.txt	e_coli_filtered_folddisco	12	--covered-node-ratio 0.75 --rmsd 2.0	Folddisco	0.148	95	result/M0262_e_coli_filtered_folddisco_Folddisco.tsv
query/M-CSA/single/M0262.txt	e_coli_filtered_folddisco	12	--covered-node-ratio 0.75 --skip-match	Folddisco_prefilter	0.022	129	result/M0262_e_coli_filtered_folddisco_Folddisco_prefilter.tsv
query/M-CSA/single/M0263.txt	e_coli_filtered_folddisco	12	--covered-node-ratio 0.75 --rmsd 2.0	Folddisco	0.057	22	result/M0263_e_coli_filtered_folddisco_Folddisco.tsv
query/M-CSA/single/M0263.txt	e_coli_filtered_folddisco	12	--covered-node-ratio 0.75 --skip-match	Folddisco_prefilter	0.015	49	result/M0263_e_coli_filtered_folddisco_Folddisco_prefilter.tsv
query/M-CSA/single/M0264.txt	e_coli_filtered_folddisco	12	--covered-node-ratio 0.75 --rmsd 2.0	Folddisco	0.049	33	result/M0264_e_coli_filtered_folddisco_Folddisco.tsv
query/M-CSA/single/M0264.txt	e_coli_filtered_folddisco	12	--covered-node-ratio 0.75 --skip-match	Folddisco_prefilter	0.016	13	result/M0264_e_coli_filtered_folddisco_Folddisco_prefilter.tsv
query/M-CSA/single/M0265.txt	e_coli_filtered_folddisco	12	--covered-node-ratio 0.75 --rmsd 2.0	Folddisco	0.045	0	result/M0265_e_coli_filtered_folddisco_Folddisco.tsv
query/M-CSA/single/M0265.txt	e_coli_filtered_folddisco	12	--covered-node-ratio 0.75 --skip-match	Folddisco_prefilter	0.017	2	result/M0265_e_coli_filtered_folddisco_Folddisco_prefilter.tsv
query/M-CSA/single/M0266.txt	e_coli_filtered_folddisco	12	--covered-node-ratio 0.75 --rmsd 2.0	Folddisco	0.077	0	result/M0266_e_coli_filtered_folddisco_Folddisco.tsv
query/M-CSA/single/M0266.txt	e_coli_filtered_folddisco	12	--covered-node-ratio 0.75 --skip-match	Folddisco_prefilter	0.015	15	result/M0266_e_coli_filtered_folddisco_Folddisco_prefilter.tsv
query/M-CSA/single/M0267.txt	e_coli_filtered_folddisco	12	--covered-node-ratio 0.75 --rmsd 2.0	Folddisco	0.021	3	result/M0267_e_coli_filtered_folddisco_Folddisco.tsv
query/M-CSA/single/M0267.txt	e_coli_filtered_folddisco	12	--covered-node-ratio 0.75 --skip-match	Folddisco_prefilter	0.013	3	result/M0267_e_coli_filtered_folddisco_Folddisco_prefilter.tsv
query/M-CSA/single/M0268.txt	e_coli_filtered_folddisco	12	--covered-node-ratio 0.75 --rmsd 2.0	Folddisco	0.031	3	result/M0268_e_coli_filtered_folddisco_Folddisco.tsv
query/M-CSA/single/M0268.txt	e_coli_filtered_folddisco	12	--covered-node-ratio 0.75 --skip-match	Folddisco_prefilter	0.013	2	result/M0268_e_coli_filtered_folddisco_Folddisco_prefilter.tsv
query/M-CSA/single/M0269.txt	e_coli_filtered_folddisco	12	--covered-node-ratio 0.75 --rmsd 2.0	Folddisco	0.021	0	result/M0269_e_coli_filtered_folddisco_Folddisco.tsv
query/M-CSA/single/M0269.txt	e_coli_filtered_folddisco	12	--covered-node-ratio 0.75 --skip-match	Folddisco_prefilter	0.013	2	result/M0269_e_coli_filtered_folddisco_Folddisco_prefilter.tsv
query/M-CSA/single/M0270.txt	e_coli_filtered_folddisco	12	--covered-node-ratio 0.75 --rmsd 2.0	Folddisco	0.024	3	result/M0270_e_coli_filtered_folddisco_Folddisco.tsv
query/M-CSA/single/M0270.txt	e_coli_filtered_folddisco	12	--covered-node-ratio 0.75 --skip-match	Folddisco_prefilter	0.012	4	result/M0270_e_coli_filtered_folddisco_Folddisco_prefilter.tsv
query/M-CSA/single/M0271.txt	e_coli_filtered_folddisco	12	--covered-node-ratio 0.75 --rmsd 2.0	Folddisco	0.109	13	result/M0271_e_coli_filtered_folddisco_Folddisco.tsv
query/M-CSA/single/M0271.txt	e_coli_filtered_folddisco	12	--covered-node-ratio 0.75 --skip-match	Folddisco_prefilter	0.021	18	result/M0271_e_coli_filtered_folddisco_Folddisco_prefilter.tsv
query/M-CSA/single/M0272.txt	e_coli_filtered_folddisco	12	--covered-node-ratio 0.75 --rmsd 2.0	Folddisco	0.021	0	result/M0272_e_coli_filtered_folddisco_Folddisco.tsv
query/M-CSA/single/M0272.txt	e_coli_filtered_folddisco	12	--covered-node-ratio 0.75 --skip-match	Folddisco_prefilter	0.016	0	result/M0272_e_coli_filtered_folddisco_Folddisco_prefilter.tsv
query/M-CSA/single/M0273.txt	e_coli_filtered_folddisco	12	--covered-node-ratio 0.75 --rmsd 2.0	Folddisco	0.019	0	result/M0273_e_coli_filtered_folddisco_Folddisco.tsv
query/M-CSA/single/M0273.txt	e_coli_filtered_folddisco	12	--covered-node-ratio 0.75 --skip-match	Folddisco_prefilter	0.016	0	result/M0273_e_coli_filtered_folddisco_Folddisco_prefilter.tsv
query/M-CSA/single/M0274.txt	e_coli_filtered_folddisco	12	--covered-node-ratio 0.75 --rmsd 2.0	Folddisco	0.024	0	result/M0274_e_coli_filtered_folddisco_Folddisco.tsv
query/M-CSA/single/M0274.txt	e_coli_filtered_folddisco	12	--covered-node-ratio 0.75 --skip-match	Folddisco_prefilter	0.017	0	result/M0274_e_coli_filtered_folddisco_Folddisco_prefilter.tsv
query/M-CSA/single/M0275.txt	e_coli_filtered_folddisco	12	--covered-node-ratio 0.75 --rmsd 2.0	Folddisco	0.076	144	result/M0275_e_coli_filtered_folddisco_Folddisco.tsv
query/M-CSA/single/M0275.txt	e_coli_filtered_folddisco	12	--covered-node-ratio 0.75 --skip-match	Folddisco_prefilter	0.021	75	result/M0275_e_coli_filtered_folddisco_Folddisco_prefilter.tsv
query/M-CSA/single/M0276.txt	e_coli_filtered_folddisco	12	--covered-node-ratio 0.75 --rmsd 2.0	Folddisco	0.059	2	result/M0276_e_coli_filtered_folddisco_Folddisco.tsv
query/M-CSA/single/M0276.txt	e_coli_filtered_folddisco	12	--covered-node-ratio 0.75 --skip-match	Folddisco_prefilter	0.039	1	result/M0276_e_coli_filtered_folddisco_Folddisco_prefilter.tsv
query/M-CSA/single/M0277.txt	e_coli_filtered_folddisco	12	--covered-node-ratio 0.75 --rmsd 2.0	Folddisco	0.016	0	result/M0277_e_coli_filtered_folddisco_Folddisco.tsv
query/M-CSA/single/M0277.txt	e_coli_filtered_folddisco	12	--covered-node-ratio 0.75 --skip-match	Folddisco_prefilter	0.013	0	result/M0277_e_coli_filtered_folddisco_Folddisco_prefilter.tsv
query/M-CSA/single/M0278.txt	e_coli_filtered_folddisco	12	--covered-node-ratio 0.75 --rmsd 2.0	Folddisco	0.015	0	result/M0278_e_coli_filtered_folddisco_Folddisco.tsv
query/M-CSA/single/M0278.txt	e_coli_filtered_folddisco	12	--covered-node-ratio 0.75 --skip-match	Folddisco_prefilter	0.011	0	result/M0278_e_coli_filtered_folddisco_Folddisco_prefilter.tsv
query/M-CSA/single/M0279.txt	e_coli_filtered_folddisco	12	--covered-node-ratio 0.75 --rmsd 2.0	Folddisco	0.016	1	result/M0279_e_coli_filtered_folddisco_Folddisco.tsv
query/M-CSA/single/M0279.txt	e_coli_filtered_folddisco	12	--covered-node-ratio 0.75 --skip-match	Folddisco_prefilter	0.01	1	result/M0279_e_coli_filtered_folddisco_Folddisco_prefilter.tsv
query/M-CSA/single/M0280.txt	e_coli_filtered_folddisco	12	--covered-node-ratio 0.75 --rmsd 2.0	Folddisco	0.025	4	result/M0280_e_coli_filtered_folddisco_Folddisco.tsv
query/M-CSA/single/M0280.txt	e_coli_filtered_folddisco	12	--covered-node-ratio 0.75 --skip-match	Folddisco_prefilter	0.013	2	result/M0280_e_coli_filtered_folddisco_Folddisco_prefilter.tsv
query/M-CSA/single/M0281.txt	e_coli_filtered_folddisco	12	--covered-node-ratio 0.75 --rmsd 2.0	Folddisco	0.026	0	result/M0281_e_coli_filtered_folddisco_Folddisco.tsv
query/M-CSA/single/M0281.txt	e_coli_filtered_folddisco	12	--covered-node-ratio 0.75 --skip-match	Folddisco_prefilter	0.016	1	result/M0281_e_coli_filtered_folddisco_Folddisco_prefilter.tsv
query/M-CSA/single/M0282.txt	e_coli_filtered_folddisco	12	--covered-node-ratio 0.75 --rmsd 2.0	Folddisco	0.047	50	result/M0282_e_coli_filtered_folddisco_Folddisco.tsv
query/M-CSA/single/M0282.txt	e_coli_filtered_folddisco	12	--covered-node-ratio 0.75 --skip-match	Folddisco_prefilter	0.012	49	result/M0282_e_coli_filtered_folddisco_Folddisco_prefilter.tsv
query/M-CSA/single/M0283.txt	e_coli_filtered_folddisco	12	--covered-node-ratio 0.75 --rmsd 2.0	Folddisco	0.045	23	result/M0283_e_coli_filtered_folddisco_Folddisco.tsv
query/M-CSA/single/M0283.txt	e_coli_filtered_folddisco	12	--covered-node-ratio 0.75 --skip-match	Folddisco_prefilter	0.013	23	result/M0283_e_coli_filtered_folddisco_Folddisco_prefilter.tsv
query/M-CSA/single/M0284.txt	e_coli_filtered_folddisco	12	--covered-node-ratio 0.75 --rmsd 2.0	Folddisco	0.021	0	result/M0284_e_coli_filtered_folddisco_Folddisco.tsv
query/M-CSA/single/M0284.txt	e_coli_filtered_folddisco	12	--covered-node-ratio 0.75 --skip-match	Folddisco_prefilter	0.02	0	result/M0284_e_coli_filtered_folddisco_Folddisco_prefilter.tsv
query/M-CSA/single/M0285.txt	e_coli_filtered_folddisco	12	--covered-node-ratio 0.75 --rmsd 2.0	Folddisco	0.041	20	result/M0285_e_coli_filtered_folddisco_Folddisco.tsv
query/M-CSA/single/M0285.txt	e_coli_filtered_folddisco	12	--covered-node-ratio 0.75 --skip-match	Folddisco_prefilter	0.013	14	result/M0285_e_coli_filtered_folddisco_Folddisco_prefilter.tsv
query/M-CSA/single/M0286.txt	e_coli_filtered_folddisco	12	--covered-node-ratio 0.75 --rmsd 2.0	Folddisco	0.032	0	result/M0286_e_coli_filtered_folddisco_Folddisco.tsv
query/M-CSA/single/M0286.txt	e_coli_filtered_folddisco	12	--covered-node-ratio 0.75 --skip-match	Folddisco_prefilter	0.017	1	result/M0286_e_coli_filtered_folddisco_Folddisco_prefilter.tsv
query/M-CSA/single/M0287.txt	e_coli_filtered_folddisco	12	--covered-node-ratio 0.75 --rmsd 2.0	Folddisco	0.06	33	result/M0287_e_coli_filtered_folddisco_Folddisco.tsv
query/M-CSA/single/M0287.txt	e_coli_filtered_folddisco	12	--covered-node-ratio 0.75 --skip-match	Folddisco_prefilter	0.013	21	result/M0287_e_coli_filtered_folddisco_Folddisco_prefilter.tsv
query/M-CSA/single/M0288.txt	e_coli_filtered_folddisco	12	--covered-node-ratio 0.75 --rmsd 2.0	Folddisco	0.025	0	result/M0288_e_coli_filtered_folddisco_Folddisco.tsv
query/M-CSA/single/M0288.txt	e_coli_filtered_folddisco	12	--covered-node-ratio 0.75 --skip-match	Folddisco_prefilter	0.017	0	result/M0288_e_coli_filtered_folddisco_Folddisco_prefilter.tsv
query/M-CSA/single/M0289.txt	e_coli_filtered_folddisco	12	--covered-node-ratio 0.75 --rmsd 2.0	Folddisco	0.051	8	result/M0289_e_coli_filtered_folddisco_Folddisco.tsv
query/M-CSA/single/M0289.txt	e_coli_filtered_folddisco	12	--covered-node-ratio 0.75 --skip-match	Folddisco_prefilter	0.017	5	result/M0289_e_coli_filtered_folddisco_Folddisco_prefilter.tsv
query/M-CSA/single/M0290.txt	e_coli_filtered_folddisco	12	--covered-node-ratio 0.75 --rmsd 2.0	Folddisco	0.025	5	result/M0290_e_coli_filtered_folddisco_Folddisco.tsv
query/M-CSA/single/M0290.txt	e_coli_filtered_folddisco	12	--covered-node-ratio 0.75 --skip-match	Folddisco_prefilter	0.012	6	result/M0290_e_coli_filtered_folddisco_Folddisco_prefilter.tsv
query/M-CSA/single/M0291.txt	e_coli_filtered_folddisco	12	--covered-node-ratio 0.75 --rmsd 2.0	Folddisco	0.045	10	result/M0291_e_coli_filtered_folddisco_Folddisco.tsv
query/M-CSA/single/M0291.txt	e_coli_filtered_folddisco	12	--covered-node-ratio 0.75 --skip-match	Folddisco_prefilter	0.016	7	result/M0291_e_coli_filtered_folddisco_Folddisco_prefilter.tsv
query/M-CSA/single/M0292.txt	e_coli_filtered_folddisco	12	--covered-node-ratio 0.75 --rmsd 2.0	Folddisco	0.027	2	result/M0292_e_coli_filtered_folddisco_Folddisco.tsv
query/M-CSA/single/M0292.txt	e_coli_filtered_folddisco	12	--covered-node-ratio 0.75 --skip-match	Folddisco_prefilter	0.018	2	result/M0292_e_coli_filtered_folddisco_Folddisco_prefilter.tsv
query/M-CSA/single/M0293.txt	e_coli_filtered_folddisco	12	--covered-node-ratio 0.75 --rmsd 2.0	Folddisco	0.056	53	result/M0293_e_coli_filtered_folddisco_Folddisco.tsv
query/M-CSA/single/M0293.txt	e_coli_filtered_folddisco	12	--covered-node-ratio 0.75 --skip-match	Folddisco_prefilter	0.014	39	result/M0293_e_coli_filtered_folddisco_Folddisco_prefilter.tsv
query/M-CSA/single/M0294.txt	e_coli_filtered_folddisco	12	--covered-node-ratio 0.75 --rmsd 2.0	Folddisco	0.045	9	result/M0294_e_coli_filtered_folddisco_Folddisco.tsv
query/M-CSA/single/M0294.txt	e_coli_filtered_folddisco	12	--covered-node-ratio 0.75 --skip-match	Folddisco_prefilter	0.02	8	result/M0294_e_coli_filtered_folddisco_Folddisco_prefilter.tsv
query/M-CSA/single/M0295.txt	e_coli_filtered_folddisco	12	--covered-node-ratio 0.75 --rmsd 2.0	Folddisco	0.015	0	result/M0295_e_coli_filtered_folddisco_Folddisco.tsv
query/M-CSA/single/M0295.txt	e_coli_filtered_folddisco	12	--covered-node-ratio 0.75 --skip-match	Folddisco_prefilter	0.011	0	result/M0295_e_coli_filtered_folddisco_Folddisco_prefilter.tsv
query/M-CSA/single/M0296.txt	e_coli_filtered_folddisco	12	--covered-node-ratio 0.75 --rmsd 2.0	Folddisco	0.037	38	result/M0296_e_coli_filtered_folddisco_Folddisco.tsv
query/M-CSA/single/M0296.txt	e_coli_filtered_folddisco	12	--covered-node-ratio 0.75 --skip-match	Folddisco_prefilter	0.014	37	result/M0296_e_coli_filtered_folddisco_Folddisco_prefilter.tsv
query/M-CSA/single/M0297.txt	e_coli_filtered_folddisco	12	--covered-node-ratio 0.75 --rmsd 2.0	Folddisco	0.016	0	result/M0297_e_coli_filtered_folddisco_Folddisco.tsv
query/M-CSA/single/M0297.txt	e_coli_filtered_folddisco	12	--covered-node-ratio 0.75 --skip-match	Folddisco_prefilter	0.012	0	result/M0297_e_coli_filtered_folddisco_Folddisco_prefilter.tsv
query/M-CSA/single/M0298.txt	e_coli_filtered_folddisco	12	--covered-node-ratio 0.75 --rmsd 2.0	Folddisco	0.059	69	result/M0298_e_coli_filtered_folddisco_Folddisco.tsv
query/M-CSA/single/M0298.txt	e_coli_filtered_folddisco	12	--covered-node-ratio 0.75 --skip-match	Folddisco_prefilter	0.028	34	result/M0298_e_coli_filtered_folddisco_Folddisco_prefilter.tsv
query/M-CSA/single/M0299.txt	e_coli_filtered_folddisco	12	--covered-node-ratio 0.75 --rmsd 2.0	Folddisco	0.024	4	result/M0299_e_coli_filtered_folddisco_Folddisco.tsv
query/M-CSA/single/M0299.txt	e_coli_filtered_folddisco	12	--covered-node-ratio 0.75 --skip-match	Folddisco_prefilter	0.013	2	result/M0299_e_coli_filtered_folddisco_Folddisco_prefilter.tsv
query/M-CSA/single/M0300.txt	e_coli_filtered_folddisco	12	--covered-node-ratio 0.75 --rmsd 2.0	Folddisco	0.048	12	result/M0300_e_coli_filtered_folddisco_Folddisco.tsv
query/M-CSA/single/M0300.txt	e_coli_filtered_folddisco	12	--covered-node-ratio 0.75 --skip-match	Folddisco_prefilter	0.012	6	result/M0300_e_coli_filtered_folddisco_Folddisco_prefilter.tsv
query/M-CSA/single/M0301.txt	e_coli_filtered_folddisco	12	--covered-node-ratio 0.75 --rmsd 2.0	Folddisco	0.017	2	result/M0301_e_coli_filtered_folddisco_Folddisco.tsv
query/M-CSA/single/M0301.txt	e_coli_filtered_folddisco	12	--covered-node-ratio 0.75 --skip-match	Folddisco_prefilter	0.012	1	result/M0301_e_coli_filtered_folddisco_Folddisco_prefilter.tsv
query/M-CSA/single/M0302.txt	e_coli_filtered_folddisco	12	--covered-node-ratio 0.75 --rmsd 2.0	Folddisco	0.082	20	result/M0302_e_coli_filtered_folddisco_Folddisco.tsv
query/M-CSA/single/M0302.txt	e_coli_filtered_folddisco	12	--covered-node-ratio 0.75 --skip-match	Folddisco_prefilter	0.019	9	result/M0302_e_coli_filtered_folddisco_Folddisco_prefilter.tsv
query/M-CSA/single/M0303.txt	e_coli_filtered_folddisco	12	--covered-node-ratio 0.75 --rmsd 2.0	Folddisco	0.019	0	result/M0303_e_coli_filtered_folddisco_Folddisco.tsv
query/M-CSA/single/M0303.txt	e_coli_filtered_folddisco	12	--covered-node-ratio 0.75 --skip-match	Folddisco_prefilter	0.013	0	result/M0303_e_coli_filtered_folddisco_Folddisco_prefilter.tsv
query/M-CSA/single/M0304.txt	e_coli_filtered_folddisco	12	--covered-node-ratio 0.75 --rmsd 2.0	Folddisco	0.025	0	result/M0304_e_coli_filtered_folddisco_Folddisco.tsv
query/M-CSA/single/M0304.txt	e_coli_filtered_folddisco	12	--covered-node-ratio 0.75 --skip-match	Folddisco_prefilter	0.021	0	result/M0304_e_coli_filtered_folddisco_Folddisco_prefilter.tsv
query/M-CSA/single/M0305.txt	e_coli_filtered_folddisco	12	--covered-node-ratio 0.75 --rmsd 2.0	Folddisco	0.014	0	result/M0305_e_coli_filtered_folddisco_Folddisco.tsv
query/M-CSA/single/M0305.txt	e_coli_filtered_folddisco	12	--covered-node-ratio 0.75 --skip-match	Folddisco_prefilter	0.01	0	result/M0305_e_coli_filtered_folddisco_Folddisco_prefilter.tsv
query/M-CSA/single/M0306.txt	e_coli_filtered_folddisco	12	--covered-node-ratio 0.75 --rmsd 2.0	Folddisco	0.032	8	result/M0306_e_coli_filtered_folddisco_Folddisco.tsv
query/M-CSA/single/M0306.txt	e_coli_filtered_folddisco	12	--covered-node-ratio 0.75 --skip-match	Folddisco_prefilter	0.015	8	result/M0306_e_coli_filtered_folddisco_Folddisco_prefilter.tsv
query/M-CSA/single/M0307.txt	e_coli_filtered_folddisco	12	--covered-node-ratio 0.75 --rmsd 2.0	Folddisco	0.046	7	result/M0307_e_coli_filtered_folddisco_Folddisco.tsv
query/M-CSA/single/M0307.txt	e_coli_filtered_folddisco	12	--covered-node-ratio 0.75 --skip-match	Folddisco_prefilter	0.02	3	result/M0307_e_coli_filtered_folddisco_Folddisco_prefilter.tsv
query/M-CSA/single/M0308.txt	e_coli_filtered_folddisco	12	--covered-node-ratio 0.75 --rmsd 2.0	Folddisco	0.025	0	result/M0308_e_coli_filtered_folddisco_Folddisco.tsv
query/M-CSA/single/M0308.txt	e_coli_filtered_folddisco	12	--covered-node-ratio 0.75 --skip-match	Folddisco_prefilter	0.016	1	result/M0308_e_coli_filtered_folddisco_Folddisco_prefilter.tsv
query/M-CSA/single/M0309.txt	e_coli_filtered_folddisco	12	--covered-node-ratio 0.75 --rmsd 2.0	Folddisco	0.029	0	result/M0309_e_coli_filtered_folddisco_Folddisco.tsv
query/M-CSA/single/M0309.txt	e_coli_filtered_folddisco	12	--covered-node-ratio 0.75 --skip-match	Folddisco_prefilter	0.015	1	result/M0309_e_coli_filtered_folddisco_Folddisco_prefilter.tsv
query/M-CSA/single/M0310.txt	e_coli_filtered_folddisco	12	--covered-node-ratio 0.75 --rmsd 2.0	Folddisco	0.068	11	result/M0310_e_coli_filtered_folddisco_Folddisco.tsv
query/M-CSA/single/M0310.txt	e_coli_filtered_folddisco	12	--covered-node-ratio 0.75 --skip-match	Folddisco_prefilter	0.017	6	result/M0310_e_coli_filtered_folddisco_Folddisco_prefilter.tsv
query/M-CSA/single/M0311.txt	e_coli_filtered_folddisco	12	--covered-node-ratio 0.75 --rmsd 2.0	Folddisco	0.022	1	result/M0311_e_coli_filtered_folddisco_Folddisco.tsv
query/M-CSA/single/M0311.txt	e_coli_filtered_folddisco	12	--covered-node-ratio 0.75 --skip-match	Folddisco_prefilter	0.014	1	result/M0311_e_coli_filtered_folddisco_Folddisco_prefilter.tsv
query/M-CSA/single/M0312.txt	e_coli_filtered_folddisco	12	--covered-node-ratio 0.75 --rmsd 2.0	Folddisco	0.031	8	result/M0312_e_coli_filtered_folddisco_Folddisco.tsv
query/M-CSA/single/M0312.txt	e_coli_filtered_folddisco	12	--covered-node-ratio 0.75 --skip-match	Folddisco_prefilter	0.014	7	result/M0312_e_coli_filtered_folddisco_Folddisco_prefilter.tsv
query/M-CSA/single/M0313.txt	e_coli_filtered_folddisco	12	--covered-node-ratio 0.75 --rmsd 2.0	Folddisco	0.018	0	result/M0313_e_coli_filtered_folddisco_Folddisco.tsv
query/M-CSA/single/M0313.txt	e_coli_filtered_folddisco	12	--covered-node-ratio 0.75 --skip-match	Folddisco_prefilter	0.014	0	result/M0313_e_coli_filtered_folddisco_Folddisco_prefilter.tsv
query/M-CSA/single/M0314.txt	e_coli_filtered_folddisco	12	--covered-node-ratio 0.75 --rmsd 2.0	Folddisco	0.031	0	result/M0314_e_coli_filtered_folddisco_Folddisco.tsv
query/M-CSA/single/M0314.txt	e_coli_filtered_folddisco	12	--covered-node-ratio 0.75 --skip-match	Folddisco_prefilter	0.016	1	result/M0314_e_coli_filtered_folddisco_Folddisco_prefilter.tsv
query/M-CSA/single/M0315.txt	e_coli_filtered_folddisco	12	--covered-node-ratio 0.75 --rmsd 2.0	Folddisco	0.055	27	result/M0315_e_coli_filtered_folddisco_Folddisco.tsv
query/M-CSA/single/M0315.txt	e_coli_filtered_folddisco	12	--covered-node-ratio 0.75 --skip-match	Folddisco_prefilter	0.02	16	result/M0315_e_coli_filtered_folddisco_Folddisco_prefilter.tsv
query/M-CSA/single/M0316.txt	e_coli_filtered_folddisco	12	--covered-node-ratio 0.75 --rmsd 2.0	Folddisco	0.052	15	result/M0316_e_coli_filtered_folddisco_Folddisco.tsv
query/M-CSA/single/M0316.txt	e_coli_filtered_folddisco	12	--covered-node-ratio 0.75 --skip-match	Folddisco_prefilter	0.019	9	result/M0316_e_coli_filtered_folddisco_Folddisco_prefilter.tsv
query/M-CSA/single/M0317.txt	e_coli_filtered_folddisco	12	--covered-node-ratio 0.75 --rmsd 2.0	Folddisco	0.021	1	result/M0317_e_coli_filtered_folddisco_Folddisco.tsv
query/M-CSA/single/M0317.txt	e_coli_filtered_folddisco	12	--covered-node-ratio 0.75 --skip-match	Folddisco_prefilter	0.012	1	result/M0317_e_coli_filtered_folddisco_Folddisco_prefilter.tsv
query/M-CSA/single/M0319.txt	e_coli_filtered_folddisco	12	--covered-node-ratio 0.75 --rmsd 2.0	Folddisco	0.015	0	result/M0319_e_coli_filtered_folddisco_Folddisco.tsv
query/M-CSA/single/M0319.txt	e_coli_filtered_folddisco	12	--covered-node-ratio 0.75 --skip-match	Folddisco_prefilter	0.014	0	result/M0319_e_coli_filtered_folddisco_Folddisco_prefilter.tsv
query/M-CSA/single/M0320.txt	e_coli_filtered_folddisco	12	--covered-node-ratio 0.75 --rmsd 2.0	Folddisco	0.018	0	result/M0320_e_coli_filtered_folddisco_Folddisco.tsv
query/M-CSA/single/M0320.txt	e_coli_filtered_folddisco	12	--covered-node-ratio 0.75 --skip-match	Folddisco_prefilter	0.014	0	result/M0320_e_coli_filtered_folddisco_Folddisco_prefilter.tsv
query/M-CSA/single/M0321.txt	e_coli_filtered_folddisco	12	--covered-node-ratio 0.75 --rmsd 2.0	Folddisco	0.042	15	result/M0321_e_coli_filtered_folddisco_Folddisco.tsv
query/M-CSA/single/M0321.txt	e_coli_filtered_folddisco	12	--covered-node-ratio 0.75 --skip-match	Folddisco_prefilter	0.015	10	result/M0321_e_coli_filtered_folddisco_Folddisco_prefilter.tsv
query/M-CSA/single/M0322.txt	e_coli_filtered_folddisco	12	--covered-node-ratio 0.75 --rmsd 2.0	Folddisco	0.02	0	result/M0322_e_coli_filtered_folddisco_Folddisco.tsv
query/M-CSA/single/M0322.txt	e_coli_filtered_folddisco	12	--covered-node-ratio 0.75 --skip-match	Folddisco_prefilter	0.015	0	result/M0322_e_coli_filtered_folddisco_Folddisco_prefilter.tsv
query/M-CSA/single/M0323.txt	e_coli_filtered_folddisco	12	--covered-node-ratio 0.75 --rmsd 2.0	Folddisco	0.062	28	result/M0323_e_coli_filtered_folddisco_Folddisco.tsv
query/M-CSA/single/M0323.txt	e_coli_filtered_folddisco	12	--covered-node-ratio 0.75 --skip-match	Folddisco_prefilter	0.016	17	result/M0323_e_coli_filtered_folddisco_Folddisco_prefilter.tsv
query/M-CSA/single/M0324.txt	e_coli_filtered_folddisco	12	--covered-node-ratio 0.75 --rmsd 2.0	Folddisco	0.017	0	result/M0324_e_coli_filtered_folddisco_Folddisco.tsv
query/M-CSA/single/M0324.txt	e_coli_filtered_folddisco	12	--covered-node-ratio 0.75 --skip-match	Folddisco_prefilter	0.011	0	result/M0324_e_coli_filtered_folddisco_Folddisco_prefilter.tsv
query/M-CSA/single/M0325.txt	e_coli_filtered_folddisco	12	--covered-node-ratio 0.75 --rmsd 2.0	Folddisco	0.065	34	result/M0325_e_coli_filtered_folddisco_Folddisco.tsv
query/M-CSA/single/M0325.txt	e_coli_filtered_folddisco	12	--covered-node-ratio 0.75 --skip-match	Folddisco_prefilter	0.019	56	result/M0325_e_coli_filtered_folddisco_Folddisco_prefilter.tsv
query/M-CSA/single/M0326.txt	e_coli_filtered_folddisco	12	--covered-node-ratio 0.75 --rmsd 2.0	Folddisco	0.026	7	result/M0326_e_coli_filtered_folddisco_Folddisco.tsv
query/M-CSA/single/M0326.txt	e_coli_filtered_folddisco	12	--covered-node-ratio 0.75 --skip-match	Folddisco_prefilter	0.012	4	result/M0326_e_coli_filtered_folddisco_Folddisco_prefilter.tsv
query/M-CSA/single/M0328.txt	e_coli_filtered_folddisco	12	--covered-node-ratio 0.75 --rmsd 2.0	Folddisco	0.021	3	result/M0328_e_coli_filtered_folddisco_Folddisco.tsv
query/M-CSA/single/M0328.txt	e_coli_filtered_folddisco	12	--covered-node-ratio 0.75 --skip-match	Folddisco_prefilter	0.012	3	result/M0328_e_coli_filtered_folddisco_Folddisco_prefilter.tsv
query/M-CSA/single/M0329.txt	e_coli_filtered_folddisco	12	--covered-node-ratio 0.75 --rmsd 2.0	Folddisco	0.024	1	result/M0329_e_coli_filtered_folddisco_Folddisco.tsv
query/M-CSA/single/M0329.txt	e_coli_filtered_folddisco	12	--covered-node-ratio 0.75 --skip-match	Folddisco_prefilter	0.013	2	result/M0329_e_coli_filtered_folddisco_Folddisco_prefilter.tsv
query/M-CSA/single/M0330.txt	e_coli_filtered_folddisco	12	--covered-node-ratio 0.75 --rmsd 2.0	Folddisco	0.041	13	result/M0330_e_coli_filtered_folddisco_Folddisco.tsv
query/M-CSA/single/M0330.txt	e_coli_filtered_folddisco	12	--covered-node-ratio 0.75 --skip-match	Folddisco_prefilter	0.014	5	result/M0330_e_coli_filtered_folddisco_Folddisco_prefilter.tsv
query/M-CSA/single/M0331.txt	e_coli_filtered_folddisco	12	--covered-node-ratio 0.75 --rmsd 2.0	Folddisco	0.049	24	result/M0331_e_coli_filtered_folddisco_Folddisco.tsv
query/M-CSA/single/M0331.txt	e_coli_filtered_folddisco	12	--covered-node-ratio 0.75 --skip-match	Folddisco_prefilter	0.017	13	result/M0331_e_coli_filtered_folddisco_Folddisco_prefilter.tsv
query/M-CSA/single/M0332.txt	e_coli_filtered_folddisco	12	--covered-node-ratio 0.75 --rmsd 2.0	Folddisco	0.023	2	result/M0332_e_coli_filtered_folddisco_Folddisco.tsv
query/M-CSA/single/M0332.txt	e_coli_filtered_folddisco	12	--covered-node-ratio 0.75 --skip-match	Folddisco_prefilter	0.011	1	result/M0332_e_coli_filtered_folddisco_Folddisco_prefilter.tsv
query/M-CSA/single/M0333.txt	e_coli_filtered_folddisco	12	--covered-node-ratio 0.75 --rmsd 2.0	Folddisco	0.029	0	result/M0333_e_coli_filtered_folddisco_Folddisco.tsv
query/M-CSA/single/M0333.txt	e_coli_filtered_folddisco	12	--covered-node-ratio 0.75 --skip-match	Folddisco_prefilter	0.02	0	result/M0333_e_coli_filtered_folddisco_Folddisco_prefilter.tsv
query/M-CSA/single/M0334.txt	e_coli_filtered_folddisco	12	--covered-node-ratio 0.75 --rmsd 2.0	Folddisco	0.022	2	result/M0334_e_coli_filtered_folddisco_Folddisco.tsv
query/M-CSA/single/M0334.txt	e_coli_filtered_folddisco	12	--covered-node-ratio 0.75 --skip-match	Folddisco_prefilter	0.012	2	result/M0334_e_coli_filtered_folddisco_Folddisco_prefilter.tsv
query/M-CSA/single/M0335.txt	e_coli_filtered_folddisco	12	--covered-node-ratio 0.75 --rmsd 2.0	Folddisco	0.017	0	result/M0335_e_coli_filtered_folddisco_Folddisco.tsv
query/M-CSA/single/M0335.txt	e_coli_filtered_folddisco	12	--covered-node-ratio 0.75 --skip-match	Folddisco_prefilter	0.012	0	result/M0335_e_coli_filtered_folddisco_Folddisco_prefilter.tsv
query/M-CSA/single/M0336.txt	e_coli_filtered_folddisco	12	--covered-node-ratio 0.75 --rmsd 2.0	Folddisco	0.034	10	result/M0336_e_coli_filtered_folddisco_Folddisco.tsv
query/M-CSA/single/M0336.txt	e_coli_filtered_folddisco	12	--covered-node-ratio 0.75 --skip-match	Folddisco_prefilter	0.019	6	result/M0336_e_coli_filtered_folddisco_Folddisco_prefilter.tsv
query/M-CSA/single/M0337.txt	e_coli_filtered_folddisco	12	--covered-node-ratio 0.75 --rmsd 2.0	Folddisco	0.021	1	result/M0337_e_coli_filtered_folddisco_Folddisco.tsv
query/M-CSA/single/M0337.txt	e_coli_filtered_folddisco	12	--covered-node-ratio 0.75 --skip-match	Folddisco_prefilter	0.012	1	result/M0337_e_coli_filtered_folddisco_Folddisco_prefilter.tsv
query/M-CSA/single/M0338.txt	e_coli_filtered_folddisco	12	--covered-node-ratio 0.75 --rmsd 2.0	Folddisco	0.029	0	result/M0338_e_coli_filtered_folddisco_Folddisco.tsv
query/M-CSA/single/M0338.txt	e_coli_filtered_folddisco	12	--covered-node-ratio 0.75 --skip-match	Folddisco_prefilter	0.023	0	result/M0338_e_coli_filtered_folddisco_Folddisco_prefilter.tsv
query/M-CSA/single/M0339.txt	e_coli_filtered_folddisco	12	--covered-node-ratio 0.75 --rmsd 2.0	Folddisco	0.033	4	result/M0339_e_coli_filtered_folddisco_Folddisco.tsv
query/M-CSA/single/M0339.txt	e_coli_filtered_folddisco	12	--covered-node-ratio 0.75 --skip-match	Folddisco_prefilter	0.012	2	result/M0339_e_coli_filtered_folddisco_Folddisco_prefilter.tsv
query/M-CSA/single/M0340.txt	e_coli_filtered_folddisco	12	--covered-node-ratio 0.75 --rmsd 2.0	Folddisco	0.022	5	result/M0340_e_coli_filtered_folddisco_Folddisco.tsv
query/M-CSA/single/M0340.txt	e_coli_filtered_folddisco	12	--covered-node-ratio 0.75 --skip-match	Folddisco_prefilter	0.01	5	result/M0340_e_coli_filtered_folddisco_Folddisco_prefilter.tsv
query/M-CSA/single/M0341.txt	e_coli_filtered_folddisco	12	--covered-node-ratio 0.75 --rmsd 2.0	Folddisco	0.074	47	result/M0341_e_coli_filtered_folddisco_Folddisco.tsv
query/M-CSA/single/M0341.txt	e_coli_filtered_folddisco	12	--covered-node-ratio 0.75 --skip-match	Folddisco_prefilter	0.015	23	result/M0341_e_coli_filtered_folddisco_Folddisco_prefilter.tsv
query/M-CSA/single/M0342.txt	e_coli_filtered_folddisco	12	--covered-node-ratio 0.75 --rmsd 2.0	Folddisco	0.051	31	result/M0342_e_coli_filtered_folddisco_Folddisco.tsv
query/M-CSA/single/M0342.txt	e_coli_filtered_folddisco	12	--covered-node-ratio 0.75 --skip-match	Folddisco_prefilter	0.014	21	result/M0342_e_coli_filtered_folddisco_Folddisco_prefilter.tsv
query/M-CSA/single/M0343.txt	e_coli_filtered_folddisco	12	--covered-node-ratio 0.75 --rmsd 2.0	Folddisco	0.062	30	result/M0343_e_coli_filtered_folddisco_Folddisco.tsv
query/M-CSA/single/M0343.txt	e_coli_filtered_folddisco	12	--covered-node-ratio 0.75 --skip-match	Folddisco_prefilter	0.018	17	result/M0343_e_coli_filtered_folddisco_Folddisco_prefilter.tsv
query/M-CSA/single/M0344.txt	e_coli_filtered_folddisco	12	--covered-node-ratio 0.75 --rmsd 2.0	Folddisco	0.018	0	result/M0344_e_coli_filtered_folddisco_Folddisco.tsv
query/M-CSA/single/M0344.txt	e_coli_filtered_folddisco	12	--covered-node-ratio 0.75 --skip-match	Folddisco_prefilter	0.014	0	result/M0344_e_coli_filtered_folddisco_Folddisco_prefilter.tsv
query/M-CSA/single/M0345.txt	e_coli_filtered_folddisco	12	--covered-node-ratio 0.75 --rmsd 2.0	Folddisco	0.056	49	result/M0345_e_coli_filtered_folddisco_Folddisco.tsv
query/M-CSA/single/M0345.txt	e_coli_filtered_folddisco	12	--covered-node-ratio 0.75 --skip-match	Folddisco_prefilter	0.014	23	result/M0345_e_coli_filtered_folddisco_Folddisco_prefilter.tsv
query/M-CSA/single/M0346.txt	e_coli_filtered_folddisco	12	--covered-node-ratio 0.75 --rmsd 2.0	Folddisco	0.035	0	result/M0346_e_coli_filtered_folddisco_Folddisco.tsv
query/M-CSA/single/M0346.txt	e_coli_filtered_folddisco	12	--covered-node-ratio 0.75 --skip-match	Folddisco_prefilter	0.029	0	result/M0346_e_coli_filtered_folddisco_Folddisco_prefilter.tsv
query/M-CSA/single/M0347.txt	e_coli_filtered_folddisco	12	--covered-node-ratio 0.75 --rmsd 2.0	Folddisco	0.024	0	result/M0347_e_coli_filtered_folddisco_Folddisco.tsv
query/M-CSA/single/M0347.txt	e_coli_filtered_folddisco	12	--covered-node-ratio 0.75 --skip-match	Folddisco_prefilter	0.019	0	result/M0347_e_coli_filtered_folddisco_Folddisco_prefilter.tsv
query/M-CSA/single/M0348.txt	e_coli_filtered_folddisco	12	--covered-node-ratio 0.75 --rmsd 2.0	Folddisco	0.02	1	result/M0348_e_coli_filtered_folddisco_Folddisco.tsv
query/M-CSA/single/M0348.txt	e_coli_filtered_folddisco	12	--covered-node-ratio 0.75 --skip-match	Folddisco_prefilter	0.013	2	result/M0348_e_coli_filtered_folddisco_Folddisco_prefilter.tsv
query/M-CSA/single/M0349.txt	e_coli_filtered_folddisco	12	--covered-node-ratio 0.75 --rmsd 2.0	Folddisco	0.028	3	result/M0349_e_coli_filtered_folddisco_Folddisco.tsv
query/M-CSA/single/M0349.txt	e_coli_filtered_folddisco	12	--covered-node-ratio 0.75 --skip-match	Folddisco_prefilter	0.011	5	result/M0349_e_coli_filtered_folddisco_Folddisco_prefilter.tsv
query/M-CSA/single/M0350.txt	e_coli_filtered_folddisco	12	--covered-node-ratio 0.75 --rmsd 2.0	Folddisco	0.015	0	result/M0350_e_coli_filtered_folddisco_Folddisco.tsv
query/M-CSA/single/M0350.txt	e_coli_filtered_folddisco	12	--covered-node-ratio 0.75 --skip-match	Folddisco_prefilter	0.013	0	result/M0350_e_coli_filtered_folddisco_Folddisco_prefilter.tsv
query/M-CSA/single/M0351.txt	e_coli_filtered_folddisco	12	--covered-node-ratio 0.75 --rmsd 2.0	Folddisco	0.016	0	result/M0351_e_coli_filtered_folddisco_Folddisco.tsv
query/M-CSA/single/M0351.txt	e_coli_filtered_folddisco	12	--covered-node-ratio 0.75 --skip-match	Folddisco_prefilter	0.014	0	result/M0351_e_coli_filtered_folddisco_Folddisco_prefilter.tsv
query/M-CSA/single/M0352.txt	e_coli_filtered_folddisco	12	--covered-node-ratio 0.75 --rmsd 2.0	Folddisco	0.029	7	result/M0352_e_coli_filtered_folddisco_Folddisco.tsv
query/M-CSA/single/M0352.txt	e_coli_filtered_folddisco	12	--covered-node-ratio 0.75 --skip-match	Folddisco_prefilter	0.015	5	result/M0352_e_coli_filtered_folddisco_Folddisco_prefilter.tsv
query/M-CSA/single/M0353.txt	e_coli_filtered_folddisco	12	--covered-node-ratio 0.75 --rmsd 2.0	Folddisco	0.02	1	result/M0353_e_coli_filtered_folddisco_Folddisco.tsv
query/M-CSA/single/M0353.txt	e_coli_filtered_folddisco	12	--covered-node-ratio 0.75 --skip-match	Folddisco_prefilter	0.011	1	result/M0353_e_coli_filtered_folddisco_Folddisco_prefilter.tsv
query/M-CSA/single/M0354.txt	e_coli_filtered_folddisco	12	--covered-node-ratio 0.75 --rmsd 2.0	Folddisco	0.016	0	result/M0354_e_coli_filtered_folddisco_Folddisco.tsv
query/M-CSA/single/M0354.txt	e_coli_filtered_folddisco	12	--covered-node-ratio 0.75 --skip-match	Folddisco_prefilter	0.012	0	result/M0354_e_coli_filtered_folddisco_Folddisco_prefilter.tsv
query/M-CSA/single/M0355.txt	e_coli_filtered_folddisco	12	--covered-node-ratio 0.75 --rmsd 2.0	Folddisco	0.023	3	result/M0355_e_coli_filtered_folddisco_Folddisco.tsv
query/M-CSA/single/M0355.txt	e_coli_filtered_folddisco	12	--covered-node-ratio 0.75 --skip-match	Folddisco_prefilter	0.011	2	result/M0355_e_coli_filtered_folddisco_Folddisco_prefilter.tsv
query/M-CSA/single/M0356.txt	e_coli_filtered_folddisco	12	--covered-node-ratio 0.75 --rmsd 2.0	Folddisco	0.03	7	result/M0356_e_coli_filtered_folddisco_Folddisco.tsv
query/M-CSA/single/M0356.txt	e_coli_filtered_folddisco	12	--covered-node-ratio 0.75 --skip-match	Folddisco_prefilter	0.013	2	result/M0356_e_coli_filtered_folddisco_Folddisco_prefilter.tsv
query/M-CSA/single/M0357.txt	e_coli_filtered_folddisco	12	--covered-node-ratio 0.75 --rmsd 2.0	Folddisco	0.015	0	result/M0357_e_coli_filtered_folddisco_Folddisco.tsv
query/M-CSA/single/M0357.txt	e_coli_filtered_folddisco	12	--covered-node-ratio 0.75 --skip-match	Folddisco_prefilter	0.011	0	result/M0357_e_coli_filtered_folddisco_Folddisco_prefilter.tsv
query/M-CSA/single/M0358.txt	e_coli_filtered_folddisco	12	--covered-node-ratio 0.75 --rmsd 2.0	Folddisco	0.04	0	result/M0358_e_coli_filtered_folddisco_Folddisco.tsv
query/M-CSA/single/M0358.txt	e_coli_filtered_folddisco	12	--covered-node-ratio 0.75 --skip-match	Folddisco_prefilter	0.024	1	result/M0358_e_coli_filtered_folddisco_Folddisco_prefilter.tsv
query/M-CSA/single/M0359.txt	e_coli_filtered_folddisco	12	--covered-node-ratio 0.75 --rmsd 2.0	Folddisco	0.025	7	result/M0359_e_coli_filtered_folddisco_Folddisco.tsv
query/M-CSA/single/M0359.txt	e_coli_filtered_folddisco	12	--covered-node-ratio 0.75 --skip-match	Folddisco_prefilter	0.012	6	result/M0359_e_coli_filtered_folddisco_Folddisco_prefilter.tsv
query/M-CSA/single/M0361.txt	e_coli_filtered_folddisco	12	--covered-node-ratio 0.75 --rmsd 2.0	Folddisco	0.049	20	result/M0361_e_coli_filtered_folddisco_Folddisco.tsv
query/M-CSA/single/M0361.txt	e_coli_filtered_folddisco	12	--covered-node-ratio 0.75 --skip-match	Folddisco_prefilter	0.02	8	result/M0361_e_coli_filtered_folddisco_Folddisco_prefilter.tsv
query/M-CSA/single/M0362.txt	e_coli_filtered_folddisco	12	--covered-node-ratio 0.75 --rmsd 2.0	Folddisco	0.033	5	result/M0362_e_coli_filtered_folddisco_Folddisco.tsv
query/M-CSA/single/M0362.txt	e_coli_filtered_folddisco	12	--covered-node-ratio 0.75 --skip-match	Folddisco_prefilter	0.013	6	result/M0362_e_coli_filtered_folddisco_Folddisco_prefilter.tsv
query/M-CSA/single/M0363.txt	e_coli_filtered_folddisco	12	--covered-node-ratio 0.75 --rmsd 2.0	Folddisco	0.065	32	result/M0363_e_coli_filtered_folddisco_Folddisco.tsv
query/M-CSA/single/M0363.txt	e_coli_filtered_folddisco	12	--covered-node-ratio 0.75 --skip-match	Folddisco_prefilter	0.013	15	result/M0363_e_coli_filtered_folddisco_Folddisco_prefilter.tsv
query/M-CSA/single/M0364.txt	e_coli_filtered_folddisco	12	--covered-node-ratio 0.75 --rmsd 2.0	Folddisco	0.018	0	result/M0364_e_coli_filtered_folddisco_Folddisco.tsv
query/M-CSA/single/M0364.txt	e_coli_filtered_folddisco	12	--covered-node-ratio 0.75 --skip-match	Folddisco_prefilter	0.013	0	result/M0364_e_coli_filtered_folddisco_Folddisco_prefilter.tsv
query/M-CSA/single/M0365.txt	e_coli_filtered_folddisco	12	--covered-node-ratio 0.75 --rmsd 2.0	Folddisco	0.027	5	result/M0365_e_coli_filtered_folddisco_Folddisco.tsv
query/M-CSA/single/M0365.txt	e_coli_filtered_folddisco	12	--covered-node-ratio 0.75 --skip-match	Folddisco_prefilter	0.014	3	result/M0365_e_coli_filtered_folddisco_Folddisco_prefilter.tsv
query/M-CSA/single/M0366.txt	e_coli_filtered_folddisco	12	--covered-node-ratio 0.75 --rmsd 2.0	Folddisco	0.051	19	result/M0366_e_coli_filtered_folddisco_Folddisco.tsv
query/M-CSA/single/M0366.txt	e_coli_filtered_folddisco	12	--covered-node-ratio 0.75 --skip-match	Folddisco_prefilter	0.015	10	result/M0366_e_coli_filtered_folddisco_Folddisco_prefilter.tsv
query/M-CSA/single/M0367.txt	e_coli_filtered_folddisco	12	--covered-node-ratio 0.75 --rmsd 2.0	Folddisco	0.08	200	result/M0367_e_coli_filtered_folddisco_Folddisco.tsv
query/M-CSA/single/M0367.txt	e_coli_filtered_folddisco	12	--covered-node-ratio 0.75 --skip-match	Folddisco_prefilter	0.021	193	result/M0367_e_coli_filtered_folddisco_Folddisco_prefilter.tsv
query/M-CSA/single/M0368.txt	e_coli_filtered_folddisco	12	--covered-node-ratio 0.75 --rmsd 2.0	Folddisco	0.045	3	result/M0368_e_coli_filtered_folddisco_Folddisco.tsv
query/M-CSA/single/M0368.txt	e_coli_filtered_folddisco	12	--covered-node-ratio 0.75 --skip-match	Folddisco_prefilter	0.016	7	result/M0368_e_coli_filtered_folddisco_Folddisco_prefilter.tsv
query/M-CSA/single/M0369.txt	e_coli_filtered_folddisco	12	--covered-node-ratio 0.75 --rmsd 2.0	Folddisco	0.047	19	result/M0369_e_coli_filtered_folddisco_Folddisco.tsv
query/M-CSA/single/M0369.txt	e_coli_filtered_folddisco	12	--covered-node-ratio 0.75 --skip-match	Folddisco_prefilter	0.015	5	result/M0369_e_coli_filtered_folddisco_Folddisco_prefilter.tsv
query/M-CSA/single/M0370.txt	e_coli_filtered_folddisco	12	--covered-node-ratio 0.75 --rmsd 2.0	Folddisco	0.019	0	result/M0370_e_coli_filtered_folddisco_Folddisco.tsv
query/M-CSA/single/M0370.txt	e_coli_filtered_folddisco	12	--covered-node-ratio 0.75 --skip-match	Folddisco_prefilter	0.015	0	result/M0370_e_coli_filtered_folddisco_Folddisco_prefilter.tsv
query/M-CSA/single/M0371.txt	e_coli_filtered_folddisco	12	--covered-node-ratio 0.75 --rmsd 2.0	Folddisco	0.049	8	result/M0371_e_coli_filtered_folddisco_Folddisco.tsv
query/M-CSA/single/M0371.txt	e_coli_filtered_folddisco	12	--covered-node-ratio 0.75 --skip-match	Folddisco_prefilter	0.015	15	result/M0371_e_coli_filtered_folddisco_Folddisco_prefilter.tsv
query/M-CSA/single/M0372.txt	e_coli_filtered_folddisco	12	--covered-node-ratio 0.75 --rmsd 2.0	Folddisco	0.013	0	result/M0372_e_coli_filtered_folddisco_Folddisco.tsv
query/M-CSA/single/M0372.txt	e_coli_filtered_folddisco	12	--covered-node-ratio 0.75 --skip-match	Folddisco_prefilter	0.009	0	result/M0372_e_coli_filtered_folddisco_Folddisco_prefilter.tsv
query/M-CSA/single/M0373.txt	e_coli_filtered_folddisco	12	--covered-node-ratio 0.75 --rmsd 2.0	Folddisco	0.055	0	result/M0373_e_coli_filtered_folddisco_Folddisco.tsv
query/M-CSA/single/M0373.txt	e_coli_filtered_folddisco	12	--covered-node-ratio 0.75 --skip-match	Folddisco_prefilter	0.017	5	result/M0373_e_coli_filtered_folddisco_Folddisco_prefilter.tsv
query/M-CSA/single/M0374.txt	e_coli_filtered_folddisco	12	--covered-node-ratio 0.75 --rmsd 2.0	Folddisco	0.054	0	result/M0374_e_coli_filtered_folddisco_Folddisco.tsv
query/M-CSA/single/M0374.txt	e_coli_filtered_folddisco	12	--covered-node-ratio 0.75 --skip-match	Folddisco_prefilter	0.017	5	result/M0374_e_coli_filtered_folddisco_Folddisco_prefilter.tsv
query/M-CSA/single/M0375.txt	e_coli_filtered_folddisco	12	--covered-node-ratio 0.75 --rmsd 2.0	Folddisco	0.039	1	result/M0375_e_coli_filtered_folddisco_Folddisco.tsv
query/M-CSA/single/M0375.txt	e_coli_filtered_folddisco	12	--covered-node-ratio 0.75 --skip-match	Folddisco_prefilter	0.015	5	result/M0375_e_coli_filtered_folddisco_Folddisco_prefilter.tsv
query/M-CSA/single/M0376.txt	e_coli_filtered_folddisco	12	--covered-node-ratio 0.75 --rmsd 2.0	Folddisco	0.026	2	result/M0376_e_coli_filtered_folddisco_Folddisco.tsv
query/M-CSA/single/M0376.txt	e_coli_filtered_folddisco	12	--covered-node-ratio 0.75 --skip-match	Folddisco_prefilter	0.022	6	result/M0376_e_coli_filtered_folddisco_Folddisco_prefilter.tsv
query/M-CSA/single/M0377.txt	e_coli_filtered_folddisco	12	--covered-node-ratio 0.75 --rmsd 2.0	Folddisco	0.077	6	result/M0377_e_coli_filtered_folddisco_Folddisco.tsv
query/M-CSA/single/M0377.txt	e_coli_filtered_folddisco	12	--covered-node-ratio 0.75 --skip-match	Folddisco_prefilter	0.021	20	result/M0377_e_coli_filtered_folddisco_Folddisco_prefilter.tsv
query/M-CSA/single/M0378.txt	e_coli_filtered_folddisco	12	--covered-node-ratio 0.75 --rmsd 2.0	Folddisco	0.027	0	result/M0378_e_coli_filtered_folddisco_Folddisco.tsv
query/M-CSA/single/M0378.txt	e_coli_filtered_folddisco	12	--covered-node-ratio 0.75 --skip-match	Folddisco_prefilter	0.022	0	result/M0378_e_coli_filtered_folddisco_Folddisco_prefilter.tsv
query/M-CSA/single/M0379.txt	e_coli_filtered_folddisco	12	--covered-node-ratio 0.75 --rmsd 2.0	Folddisco	0.033	4	result/M0379_e_coli_filtered_folddisco_Folddisco.tsv
query/M-CSA/single/M0379.txt	e_coli_filtered_folddisco	12	--covered-node-ratio 0.75 --skip-match	Folddisco_prefilter	0.016	3	result/M0379_e_coli_filtered_folddisco_Folddisco_prefilter.tsv
query/M-CSA/single/M0380.txt	e_coli_filtered_folddisco	12	--covered-node-ratio 0.75 --rmsd 2.0	Folddisco	0.062	65	result/M0380_e_coli_filtered_folddisco_Folddisco.tsv
query/M-CSA/single/M0380.txt	e_coli_filtered_folddisco	12	--covered-node-ratio 0.75 --skip-match	Folddisco_prefilter	0.016	33	result/M0380_e_coli_filtered_folddisco_Folddisco_prefilter.tsv
query/M-CSA/single/M0381.txt	e_coli_filtered_folddisco	12	--covered-node-ratio 0.75 --rmsd 2.0	Folddisco	0.024	2	result/M0381_e_coli_filtered_folddisco_Folddisco.tsv
query/M-CSA/single/M0381.txt	e_coli_filtered_folddisco	12	--covered-node-ratio 0.75 --skip-match	Folddisco_prefilter	0.013	2	result/M0381_e_coli_filtered_folddisco_Folddisco_prefilter.tsv
query/M-CSA/single/M0382.txt	e_coli_filtered_folddisco	12	--covered-node-ratio 0.75 --rmsd 2.0	Folddisco	0.018	0	result/M0382_e_coli_filtered_folddisco_Folddisco.tsv
query/M-CSA/single/M0382.txt	e_coli_filtered_folddisco	12	--covered-node-ratio 0.75 --skip-match	Folddisco_prefilter	0.012	0	result/M0382_e_coli_filtered_folddisco_Folddisco_prefilter.tsv
query/M-CSA/single/M0383.txt	e_coli_filtered_folddisco	12	--covered-node-ratio 0.75 --rmsd 2.0	Folddisco	0.027	3	result/M0383_e_coli_filtered_folddisco_Folddisco.tsv
query/M-CSA/single/M0383.txt	e_coli_filtered_folddisco	12	--covered-node-ratio 0.75 --skip-match	Folddisco_prefilter	0.014	1	result/M0383_e_coli_filtered_folddisco_Folddisco_prefilter.tsv
query/M-CSA/single/M0384.txt	e_coli_filtered_folddisco	12	--covered-node-ratio 0.75 --rmsd 2.0	Folddisco	0.017	0	result/M0384_e_coli_filtered_folddisco_Folddisco.tsv
query/M-CSA/single/M0384.txt	e_coli_filtered_folddisco	12	--covered-node-ratio 0.75 --skip-match	Folddisco_prefilter	0.013	0	result/M0384_e_coli_filtered_folddisco_Folddisco_prefilter.tsv
query/M-CSA/single/M0385.txt	e_coli_filtered_folddisco	12	--covered-node-ratio 0.75 --rmsd 2.0	Folddisco	0.064	17	result/M0385_e_coli_filtered_folddisco_Folddisco.tsv
query/M-CSA/single/M0385.txt	e_coli_filtered_folddisco	12	--covered-node-ratio 0.75 --skip-match	Folddisco_prefilter	0.02	9	result/M0385_e_coli_filtered_folddisco_Folddisco_prefilter.tsv
query/M-CSA/single/M0386.txt	e_coli_filtered_folddisco	12	--covered-node-ratio 0.75 --rmsd 2.0	Folddisco	0.057	0	result/M0386_e_coli_filtered_folddisco_Folddisco.tsv
query/M-CSA/single/M0386.txt	e_coli_filtered_folddisco	12	--covered-node-ratio 0.75 --skip-match	Folddisco_prefilter	0.018	5	result/M0386_e_coli_filtered_folddisco_Folddisco_prefilter.tsv
query/M-CSA/single/M0387.txt	e_coli_filtered_folddisco	12	--covered-node-ratio 0.75 --rmsd 2.0	Folddisco	0.017	0	result/M0387_e_coli_filtered_folddisco_Folddisco.tsv
query/M-CSA/single/M0387.txt	e_coli_filtered_folddisco	12	--covered-node-ratio 0.75 --skip-match	Folddisco_prefilter	0.012	0	result/M0387_e_coli_filtered_folddisco_Folddisco_prefilter.tsv
query/M-CSA/single/M0388.txt	e_coli_filtered_folddisco	12	--covered-node-ratio 0.75 --rmsd 2.0	Folddisco	0.018	1	result/M0388_e_coli_filtered_folddisco_Folddisco.tsv
query/M-CSA/single/M0388.txt	e_coli_filtered_folddisco	12	--covered-node-ratio 0.75 --skip-match	Folddisco_prefilter	0.012	1	result/M0388_e_coli_filtered_folddisco_Folddisco_prefilter.tsv
query/M-CSA/single/M0389.txt	e_coli_filtered_folddisco	12	--covered-node-ratio 0.75 --rmsd 2.0	Folddisco	0.016	1	result/M0389_e_coli_filtered_folddisco_Folddisco.tsv
query/M-CSA/single/M0389.txt	e_coli_filtered_folddisco	12	--covered-node-ratio 0.75 --skip-match	Folddisco_prefilter	0.012	1	result/M0389_e_coli_filtered_folddisco_Folddisco_prefilter.tsv
query/M-CSA/single/M0390.txt	e_coli_filtered_folddisco	12	--covered-node-ratio 0.75 --rmsd 2.0	Folddisco	0.038	0	result/M0390_e_coli_filtered_folddisco_Folddisco.tsv
query/M-CSA/single/M0390.txt	e_coli_filtered_folddisco	12	--covered-node-ratio 0.75 --skip-match	Folddisco_prefilter	0.019	2	result/M0390_e_coli_filtered_folddisco_Folddisco_prefilter.tsv
query/M-CSA/single/M0391.txt	e_coli_filtered_folddisco	12	--covered-node-ratio 0.75 --rmsd 2.0	Folddisco	0.053	36	result/M0391_e_coli_filtered_folddisco_Folddisco.tsv
query/M-CSA/single/M0391.txt	e_coli_filtered_folddisco	12	--covered-node-ratio 0.75 --skip-match	Folddisco_prefilter	0.014	23	result/M0391_e_coli_filtered_folddisco_Folddisco_prefilter.tsv
query/M-CSA/single/M0392.txt	e_coli_filtered_folddisco	12	--covered-node-ratio 0.75 --rmsd 2.0	Folddisco	0.057	38	result/M0392_e_coli_filtered_folddisco_Folddisco.tsv
query/M-CSA/single/M0392.txt	e_coli_filtered_folddisco	12	--covered-node-ratio 0.75 --skip-match	Folddisco_prefilter	0.012	38	result/M0392_e_coli_filtered_folddisco_Folddisco_prefilter.tsv
query/M-CSA/single/M0393.txt	e_coli_filtered_folddisco	12	--covered-node-ratio 0.75 --rmsd 2.0	Folddisco	0.039	10	result/M0393_e_coli_filtered_folddisco_Folddisco.tsv
query/M-CSA/single/M0393.txt	e_coli_filtered_folddisco	12	--covered-node-ratio 0.75 --skip-match	Folddisco_prefilter	0.013	8	result/M0393_e_coli_filtered_folddisco_Folddisco_prefilter.tsv
query/M-CSA/single/M0394.txt	e_coli_filtered_folddisco	12	--covered-node-ratio 0.75 --rmsd 2.0	Folddisco	0.046	40	result/M0394_e_coli_filtered_folddisco_Folddisco.tsv
query/M-CSA/single/M0394.txt	e_coli_filtered_folddisco	12	--covered-node-ratio 0.75 --skip-match	Folddisco_prefilter	0.012	40	result/M0394_e_coli_filtered_folddisco_Folddisco_prefilter.tsv
query/M-CSA/single/M0395.txt	e_coli_filtered_folddisco	12	--covered-node-ratio 0.75 --rmsd 2.0	Folddisco	0.019	0	result/M0395_e_coli_filtered_folddisco_Folddisco.tsv
query/M-CSA/single/M0395.txt	e_coli_filtered_folddisco	12	--covered-node-ratio 0.75 --skip-match	Folddisco_prefilter	0.013	0	result/M0395_e_coli_filtered_folddisco_Folddisco_prefilter.tsv
query/M-CSA/single/M0396.txt	e_coli_filtered_folddisco	12	--covered-node-ratio 0.75 --rmsd 2.0	Folddisco	0.065	4	result/M0396_e_coli_filtered_folddisco_Folddisco.tsv
query/M-CSA/single/M0396.txt	e_coli_filtered_folddisco	12	--covered-node-ratio 0.75 --skip-match	Folddisco_prefilter	0.013	6	result/M0396_e_coli_filtered_folddisco_Folddisco_prefilter.tsv
query/M-CSA/single/M0397.txt	e_coli_filtered_folddisco	12	--covered-node-ratio 0.75 --rmsd 2.0	Folddisco	0.023	3	result/M0397_e_coli_filtered_folddisco_Folddisco.tsv
query/M-CSA/single/M0397.txt	e_coli_filtered_folddisco	12	--covered-node-ratio 0.75 --skip-match	Folddisco_prefilter	0.012	3	result/M0397_e_coli_filtered_folddisco_Folddisco_prefilter.tsv
query/M-CSA/single/M0398.txt	e_coli_filtered_folddisco	12	--covered-node-ratio 0.75 --rmsd 2.0	Folddisco	0.022	0	result/M0398_e_coli_filtered_folddisco_Folddisco.tsv
query/M-CSA/single/M0398.txt	e_coli_filtered_folddisco	12	--covered-node-ratio 0.75 --skip-match	Folddisco_prefilter	0.013	1	result/M0398_e_coli_filtered_folddisco_Folddisco_prefilter.tsv
query/M-CSA/single/M0399.txt	e_coli_filtered_folddisco	12	--covered-node-ratio 0.75 --rmsd 2.0	Folddisco	0.026	8	result/M0399_e_coli_filtered_folddisco_Folddisco.tsv
query/M-CSA/single/M0399.txt	e_coli_filtered_folddisco	12	--covered-node-ratio 0.75 --skip-match	Folddisco_prefilter	0.014	5	result/M0399_e_coli_filtered_folddisco_Folddisco_prefilter.tsv
query/M-CSA/single/M0400.txt	e_coli_filtered_folddisco	12	--covered-node-ratio 0.75 --rmsd 2.0	Folddisco	0.019	2	result/M0400_e_coli_filtered_folddisco_Folddisco.tsv
query/M-CSA/single/M0400.txt	e_coli_filtered_folddisco	12	--covered-node-ratio 0.75 --skip-match	Folddisco_prefilter	0.013	1	result/M0400_e_coli_filtered_folddisco_Folddisco_prefilter.tsv
query/M-CSA/single/M0401.txt	e_coli_filtered_folddisco	12	--covered-node-ratio 0.75 --rmsd 2.0	Folddisco	0.068	23	result/M0401_e_coli_filtered_folddisco_Folddisco.tsv
query/M-CSA/single/M0401.txt	e_coli_filtered_folddisco	12	--covered-node-ratio 0.75 --skip-match	Folddisco_prefilter	0.02	14	result/M0401_e_coli_filtered_folddisco_Folddisco_prefilter.tsv
query/M-CSA/single/M0402.txt	e_coli_filtered_folddisco	12	--covered-node-ratio 0.75 --rmsd 2.0	Folddisco	0.026	3	result/M0402_e_coli_filtered_folddisco_Folddisco.tsv
query/M-CSA/single/M0402.txt	e_coli_filtered_folddisco	12	--covered-node-ratio 0.75 --skip-match	Folddisco_prefilter	0.013	3	result/M0402_e_coli_filtered_folddisco_Folddisco_prefilter.tsv
query/M-CSA/single/M0403.txt	e_coli_filtered_folddisco	12	--covered-node-ratio 0.75 --rmsd 2.0	Folddisco	0.037	18	result/M0403_e_coli_filtered_folddisco_Folddisco.tsv
query/M-CSA/single/M0403.txt	e_coli_filtered_folddisco	12	--covered-node-ratio 0.75 --skip-match	Folddisco_prefilter	0.013	16	result/M0403_e_coli_filtered_folddisco_Folddisco_prefilter.tsv
query/M-CSA/single/M0404.txt	e_coli_filtered_folddisco	12	--covered-node-ratio 0.75 --rmsd 2.0	Folddisco	0.021	0	result/M0404_e_coli_filtered_folddisco_Folddisco.tsv
query/M-CSA/single/M0404.txt	e_coli_filtered_folddisco	12	--covered-node-ratio 0.75 --skip-match	Folddisco_prefilter	0.015	0	result/M0404_e_coli_filtered_folddisco_Folddisco_prefilter.tsv
query/M-CSA/single/M0405.txt	e_coli_filtered_folddisco	12	--covered-node-ratio 0.75 --rmsd 2.0	Folddisco	0.033	15	result/M0405_e_coli_filtered_folddisco_Folddisco.tsv
query/M-CSA/single/M0405.txt	e_coli_filtered_folddisco	12	--covered-node-ratio 0.75 --skip-match	Folddisco_prefilter	0.017	9	result/M0405_e_coli_filtered_folddisco_Folddisco_prefilter.tsv
query/M-CSA/single/M0406.txt	e_coli_filtered_folddisco	12	--covered-node-ratio 0.75 --rmsd 2.0	Folddisco	0.034	1	result/M0406_e_coli_filtered_folddisco_Folddisco.tsv
query/M-CSA/single/M0406.txt	e_coli_filtered_folddisco	12	--covered-node-ratio 0.75 --skip-match	Folddisco_prefilter	0.014	7	result/M0406_e_coli_filtered_folddisco_Folddisco_prefilter.tsv
query/M-CSA/single/M0407.txt	e_coli_filtered_folddisco	12	--covered-node-ratio 0.75 --rmsd 2.0	Folddisco	0.046	18	result/M0407_e_coli_filtered_folddisco_Folddisco.tsv
query/M-CSA/single/M0407.txt	e_coli_filtered_folddisco	12	--covered-node-ratio 0.75 --skip-match	Folddisco_prefilter	0.013	12	result/M0407_e_coli_filtered_folddisco_Folddisco_prefilter.tsv
query/M-CSA/single/M0408.txt	e_coli_filtered_folddisco	12	--covered-node-ratio 0.75 --rmsd 2.0	Folddisco	0.032	16	result/M0408_e_coli_filtered_folddisco_Folddisco.tsv
query/M-CSA/single/M0408.txt	e_coli_filtered_folddisco	12	--covered-node-ratio 0.75 --skip-match	Folddisco_prefilter	0.016	10	result/M0408_e_coli_filtered_folddisco_Folddisco_prefilter.tsv
query/M-CSA/single/M0409.txt	e_coli_filtered_folddisco	12	--covered-node-ratio 0.75 --rmsd 2.0	Folddisco	0.013	0	result/M0409_e_coli_filtered_folddisco_Folddisco.tsv
query/M-CSA/single/M0409.txt	e_coli_filtered_folddisco	12	--covered-node-ratio 0.75 --skip-match	Folddisco_prefilter	0.01	0	result/M0409_e_coli_filtered_folddisco_Folddisco_prefilter.tsv
query/M-CSA/single/M0410.txt	e_coli_filtered_folddisco	12	--covered-node-ratio 0.75 --rmsd 2.0	Folddisco	0.046	3	result/M0410_e_coli_filtered_folddisco_Folddisco.tsv
query/M-CSA/single/M0410.txt	e_coli_filtered_folddisco	12	--covered-node-ratio 0.75 --skip-match	Folddisco_prefilter	0.022	3	result/M0410_e_coli_filtered_folddisco_Folddisco_prefilter.tsv
query/M-CSA/single/M0411.txt	e_coli_filtered_folddisco	12	--covered-node-ratio 0.75 --rmsd 2.0	Folddisco	0.068	106	result/M0411_e_coli_filtered_folddisco_Folddisco.tsv
query/M-CSA/single/M0411.txt	e_coli_filtered_folddisco	12	--covered-node-ratio 0.75 --skip-match	Folddisco_prefilter	0.015	49	result/M0411_e_coli_filtered_folddisco_Folddisco_prefilter.tsv
query/M-CSA/single/M0412.txt	e_coli_filtered_folddisco	12	--covered-node-ratio 0.75 --rmsd 2.0	Folddisco	0.031	9	result/M0412_e_coli_filtered_folddisco_Folddisco.tsv
query/M-CSA/single/M0412.txt	e_coli_filtered_folddisco	12	--covered-node-ratio 0.75 --skip-match	Folddisco_prefilter	0.013	5	result/M0412_e_coli_filtered_folddisco_Folddisco_prefilter.tsv
query/M-CSA/single/M0413.txt	e_coli_filtered_folddisco	12	--covered-node-ratio 0.75 --rmsd 2.0	Folddisco	0.082	2	result/M0413_e_coli_filtered_folddisco_Folddisco.tsv
query/M-CSA/single/M0413.txt	e_coli_filtered_folddisco	12	--covered-node-ratio 0.75 --skip-match	Folddisco_prefilter	0.018	22	result/M0413_e_coli_filtered_folddisco_Folddisco_prefilter.tsv
query/M-CSA/single/M0414.txt	e_coli_filtered_folddisco	12	--covered-node-ratio 0.75 --rmsd 2.0	Folddisco	0.014	0	result/M0414_e_coli_filtered_folddisco_Folddisco.tsv
query/M-CSA/single/M0414.txt	e_coli_filtered_folddisco	12	--covered-node-ratio 0.75 --skip-match	Folddisco_prefilter	0.011	0	result/M0414_e_coli_filtered_folddisco_Folddisco_prefilter.tsv
query/M-CSA/single/M0415.txt	e_coli_filtered_folddisco	12	--covered-node-ratio 0.75 --rmsd 2.0	Folddisco	0.023	2	result/M0415_e_coli_filtered_folddisco_Folddisco.tsv
query/M-CSA/single/M0415.txt	e_coli_filtered_folddisco	12	--covered-node-ratio 0.75 --skip-match	Folddisco_prefilter	0.011	1	result/M0415_e_coli_filtered_folddisco_Folddisco_prefilter.tsv
query/M-CSA/single/M0416.txt	e_coli_filtered_folddisco	12	--covered-node-ratio 0.75 --rmsd 2.0	Folddisco	0.042	0	result/M0416_e_coli_filtered_folddisco_Folddisco.tsv
query/M-CSA/single/M0416.txt	e_coli_filtered_folddisco	12	--covered-node-ratio 0.75 --skip-match	Folddisco_prefilter	0.015	2	result/M0416_e_coli_filtered_folddisco_Folddisco_prefilter.tsv
query/M-CSA/single/M0417.txt	e_coli_filtered_folddisco	12	--covered-node-ratio 0.75 --rmsd 2.0	Folddisco	0.018	0	result/M0417_e_coli_filtered_folddisco_Folddisco.tsv
query/M-CSA/single/M0417.txt	e_coli_filtered_folddisco	12	--covered-node-ratio 0.75 --skip-match	Folddisco_prefilter	0.013	0	result/M0417_e_coli_filtered_folddisco_Folddisco_prefilter.tsv
query/M-CSA/single/M0418.txt	e_coli_filtered_folddisco	12	--covered-node-ratio 0.75 --rmsd 2.0	Folddisco	0.044	17	result/M0418_e_coli_filtered_folddisco_Folddisco.tsv
query/M-CSA/single/M0418.txt	e_coli_filtered_folddisco	12	--covered-node-ratio 0.75 --skip-match	Folddisco_prefilter	0.013	10	result/M0418_e_coli_filtered_folddisco_Folddisco_prefilter.tsv
query/M-CSA/single/M0419.txt	e_coli_filtered_folddisco	12	--covered-node-ratio 0.75 --rmsd 2.0	Folddisco	0.018	0	result/M0419_e_coli_filtered_folddisco_Folddisco.tsv
query/M-CSA/single/M0419.txt	e_coli_filtered_folddisco	12	--covered-node-ratio 0.75 --skip-match	Folddisco_prefilter	0.012	0	result/M0419_e_coli_filtered_folddisco_Folddisco_prefilter.tsv
query/M-CSA/single/M0420.txt	e_coli_filtered_folddisco	12	--covered-node-ratio 0.75 --rmsd 2.0	Folddisco	0.027	8	result/M0420_e_coli_filtered_folddisco_Folddisco.tsv
query/M-CSA/single/M0420.txt	e_coli_filtered_folddisco	12	--covered-node-ratio 0.75 --skip-match	Folddisco_prefilter	0.013	5	result/M0420_e_coli_filtered_folddisco_Folddisco_prefilter.tsv
query/M-CSA/single/M0421.txt	e_coli_filtered_folddisco	12	--covered-node-ratio 0.75 --rmsd 2.0	Folddisco	0.03	0	result/M0421_e_coli_filtered_folddisco_Folddisco.tsv
query/M-CSA/single/M0421.txt	e_coli_filtered_folddisco	12	--covered-node-ratio 0.75 --skip-match	Folddisco_prefilter	0.016	1	result/M0421_e_coli_filtered_folddisco_Folddisco_prefilter.tsv
query/M-CSA/single/M0422.txt	e_coli_filtered_folddisco	12	--covered-node-ratio 0.75 --rmsd 2.0	Folddisco	0.811	2	result/M0422_e_coli_filtered_folddisco_Folddisco.tsv
query/M-CSA/single/M0422.txt	e_coli_filtered_folddisco	12	--covered-node-ratio 0.75 --skip-match	Folddisco_prefilter	0.778	2	result/M0422_e_coli_filtered_folddisco_Folddisco_prefilter.tsv
query/M-CSA/single/M0423.txt	e_coli_filtered_folddisco	12	--covered-node-ratio 0.75 --rmsd 2.0	Folddisco	0.029	4	result/M0423_e_coli_filtered_folddisco_Folddisco.tsv
query/M-CSA/single/M0423.txt	e_coli_filtered_folddisco	12	--covered-node-ratio 0.75 --skip-match	Folddisco_prefilter	0.018	3	result/M0423_e_coli_filtered_folddisco_Folddisco_prefilter.tsv
query/M-CSA/single/M0424.txt	e_coli_filtered_folddisco	12	--covered-node-ratio 0.75 --rmsd 2.0	Folddisco	0.023	1	result/M0424_e_coli_filtered_folddisco_Folddisco.tsv
query/M-CSA/single/M0424.txt	e_coli_filtered_folddisco	12	--covered-node-ratio 0.75 --skip-match	Folddisco_prefilter	0.015	1	result/M0424_e_coli_filtered_folddisco_Folddisco_prefilter.tsv
query/M-CSA/single/M0425.txt	e_coli_filtered_folddisco	12	--covered-node-ratio 0.75 --rmsd 2.0	Folddisco	0.08	132	result/M0425_e_coli_filtered_folddisco_Folddisco.tsv
query/M-CSA/single/M0425.txt	e_coli_filtered_folddisco	12	--covered-node-ratio 0.75 --skip-match	Folddisco_prefilter	0.017	52	result/M0425_e_coli_filtered_folddisco_Folddisco_prefilter.tsv
query/M-CSA/single/M0426.txt	e_coli_filtered_folddisco	12	--covered-node-ratio 0.75 --rmsd 2.0	Folddisco	0.02	0	result/M0426_e_coli_filtered_folddisco_Folddisco.tsv
query/M-CSA/single/M0426.txt	e_coli_filtered_folddisco	12	--covered-node-ratio 0.75 --skip-match	Folddisco_prefilter	0.012	1	result/M0426_e_coli_filtered_folddisco_Folddisco_prefilter.tsv
query/M-CSA/single/M0427.txt	e_coli_filtered_folddisco	12	--covered-node-ratio 0.75 --rmsd 2.0	Folddisco	0.056	30	result/M0427_e_coli_filtered_folddisco_Folddisco.tsv
query/M-CSA/single/M0427.txt	e_coli_filtered_folddisco	12	--covered-node-ratio 0.75 --skip-match	Folddisco_prefilter	0.014	12	result/M0427_e_coli_filtered_folddisco_Folddisco_prefilter.tsv
query/M-CSA/single/M0428.txt	e_coli_filtered_folddisco	12	--covered-node-ratio 0.75 --rmsd 2.0	Folddisco	0.041	6	result/M0428_e_coli_filtered_folddisco_Folddisco.tsv
query/M-CSA/single/M0428.txt	e_coli_filtered_folddisco	12	--covered-node-ratio 0.75 --skip-match	Folddisco_prefilter	0.014	8	result/M0428_e_coli_filtered_folddisco_Folddisco_prefilter.tsv
query/M-CSA/single/M0429.txt	e_coli_filtered_folddisco	12	--covered-node-ratio 0.75 --rmsd 2.0	Folddisco	0.023	3	result/M0429_e_coli_filtered_folddisco_Folddisco.tsv
query/M-CSA/single/M0429.txt	e_coli_filtered_folddisco	12	--covered-node-ratio 0.75 --skip-match	Folddisco_prefilter	0.017	2	result/M0429_e_coli_filtered_folddisco_Folddisco_prefilter.tsv
query/M-CSA/single/M0430.txt	e_coli_filtered_folddisco	12	--covered-node-ratio 0.75 --rmsd 2.0	Folddisco	0.018	1	result/M0430_e_coli_filtered_folddisco_Folddisco.tsv
query/M-CSA/single/M0430.txt	e_coli_filtered_folddisco	12	--covered-node-ratio 0.75 --skip-match	Folddisco_prefilter	0.012	1	result/M0430_e_coli_filtered_folddisco_Folddisco_prefilter.tsv
query/M-CSA/single/M0431.txt	e_coli_filtered_folddisco	12	--covered-node-ratio 0.75 --rmsd 2.0	Folddisco	0.027	7	result/M0431_e_coli_filtered_folddisco_Folddisco.tsv
query/M-CSA/single/M0431.txt	e_coli_filtered_folddisco	12	--covered-node-ratio 0.75 --skip-match	Folddisco_prefilter	0.012	5	result/M0431_e_coli_filtered_folddisco_Folddisco_prefilter.tsv
query/M-CSA/single/M0432.txt	e_coli_filtered_folddisco	12	--covered-node-ratio 0.75 --rmsd 2.0	Folddisco	0.055	18	result/M0432_e_coli_filtered_folddisco_Folddisco.tsv
query/M-CSA/single/M0432.txt	e_coli_filtered_folddisco	12	--covered-node-ratio 0.75 --skip-match	Folddisco_prefilter	0.011	14	result/M0432_e_coli_filtered_folddisco_Folddisco_prefilter.tsv
query/M-CSA/single/M0433.txt	e_coli_filtered_folddisco	12	--covered-node-ratio 0.75 --rmsd 2.0	Folddisco	0.027	1	result/M0433_e_coli_filtered_folddisco_Folddisco.tsv
query/M-CSA/single/M0433.txt	e_coli_filtered_folddisco	12	--covered-node-ratio 0.75 --skip-match	Folddisco_prefilter	0.016	1	result/M0433_e_coli_filtered_folddisco_Folddisco_prefilter.tsv
query/M-CSA/single/M0434.txt	e_coli_filtered_folddisco	12	--covered-node-ratio 0.75 --rmsd 2.0	Folddisco	0.017	0	result/M0434_e_coli_filtered_folddisco_Folddisco.tsv
query/M-CSA/single/M0434.txt	e_coli_filtered_folddisco	12	--covered-node-ratio 0.75 --skip-match	Folddisco_prefilter	0.015	0	result/M0434_e_coli_filtered_folddisco_Folddisco_prefilter.tsv
query/M-CSA/single/M0435.txt	e_coli_filtered_folddisco	12	--covered-node-ratio 0.75 --rmsd 2.0	Folddisco	0.06	0	result/M0435_e_coli_filtered_folddisco_Folddisco.tsv
query/M-CSA/single/M0435.txt	e_coli_filtered_folddisco	12	--covered-node-ratio 0.75 --skip-match	Folddisco_prefilter	0.038	1	result/M0435_e_coli_filtered_folddisco_Folddisco_prefilter.tsv
query/M-CSA/single/M0436.txt	e_coli_filtered_folddisco	12	--covered-node-ratio 0.75 --rmsd 2.0	Folddisco	0.081	70	result/M0436_e_coli_filtered_folddisco_Folddisco.tsv
query/M-CSA/single/M0436.txt	e_coli_filtered_folddisco	12	--covered-node-ratio 0.75 --skip-match	Folddisco_prefilter	0.016	36	result/M0436_e_coli_filtered_folddisco_Folddisco_prefilter.tsv
query/M-CSA/single/M0437.txt	e_coli_filtered_folddisco	12	--covered-node-ratio 0.75 --rmsd 2.0	Folddisco	0.021	1	result/M0437_e_coli_filtered_folddisco_Folddisco.tsv
query/M-CSA/single/M0437.txt	e_coli_filtered_folddisco	12	--covered-node-ratio 0.75 --skip-match	Folddisco_prefilter	0.014	1	result/M0437_e_coli_filtered_folddisco_Folddisco_prefilter.tsv
query/M-CSA/single/M0438.txt	e_coli_filtered_folddisco	12	--covered-node-ratio 0.75 --rmsd 2.0	Folddisco	0.019	0	result/M0438_e_coli_filtered_folddisco_Folddisco.tsv
query/M-CSA/single/M0438.txt	e_coli_filtered_folddisco	12	--covered-node-ratio 0.75 --skip-match	Folddisco_prefilter	0.018	0	result/M0438_e_coli_filtered_folddisco_Folddisco_prefilter.tsv
query/M-CSA/single/M0439.txt	e_coli_filtered_folddisco	12	--covered-node-ratio 0.75 --rmsd 2.0	Folddisco	0.037	6	result/M0439_e_coli_filtered_folddisco_Folddisco.tsv
query/M-CSA/single/M0439.txt	e_coli_filtered_folddisco	12	--covered-node-ratio 0.75 --skip-match	Folddisco_prefilter	0.014	3	result/M0439_e_coli_filtered_folddisco_Folddisco_prefilter.tsv
query/M-CSA/single/M0440.txt	e_coli_filtered_folddisco	12	--covered-node-ratio 0.75 --rmsd 2.0	Folddisco	0.028	0	result/M0440_e_coli_filtered_folddisco_Folddisco.tsv
query/M-CSA/single/M0440.txt	e_coli_filtered_folddisco	12	--covered-node-ratio 0.75 --skip-match	Folddisco_prefilter	0.014	1	result/M0440_e_coli_filtered_folddisco_Folddisco_prefilter.tsv
query/M-CSA/single/M0441.txt	e_coli_filtered_folddisco	12	--covered-node-ratio 0.75 --rmsd 2.0	Folddisco	0.028	4	result/M0441_e_coli_filtered_folddisco_Folddisco.tsv
query/M-CSA/single/M0441.txt	e_coli_filtered_folddisco	12	--covered-node-ratio 0.75 --skip-match	Folddisco_prefilter	0.013	2	result/M0441_e_coli_filtered_folddisco_Folddisco_prefilter.tsv
query/M-CSA/single/M0442.txt	e_coli_filtered_folddisco	12	--covered-node-ratio 0.75 --rmsd 2.0	Folddisco	0.03	1	result/M0442_e_coli_filtered_folddisco_Folddisco.tsv
query/M-CSA/single/M0442.txt	e_coli_filtered_folddisco	12	--covered-node-ratio 0.75 --skip-match	Folddisco_prefilter	0.013	6	result/M0442_e_coli_filtered_folddisco_Folddisco_prefilter.tsv
query/M-CSA/single/M0443.txt	e_coli_filtered_folddisco	12	--covered-node-ratio 0.75 --rmsd 2.0	Folddisco	0.017	0	result/M0443_e_coli_filtered_folddisco_Folddisco.tsv
query/M-CSA/single/M0443.txt	e_coli_filtered_folddisco	12	--covered-node-ratio 0.75 --skip-match	Folddisco_prefilter	0.015	0	result/M0443_e_coli_filtered_folddisco_Folddisco_prefilter.tsv
query/M-CSA/single/M0444.txt	e_coli_filtered_folddisco	12	--covered-node-ratio 0.75 --rmsd 2.0	Folddisco	0.066	114	result/M0444_e_coli_filtered_folddisco_Folddisco.tsv
query/M-CSA/single/M0444.txt	e_coli_filtered_folddisco	12	--covered-node-ratio 0.75 --skip-match	Folddisco_prefilter	0.017	54	result/M0444_e_coli_filtered_folddisco_Folddisco_prefilter.tsv
query/M-CSA/single/M0445.txt	e_coli_filtered_folddisco	12	--covered-node-ratio 0.75 --rmsd 2.0	Folddisco	0.037	1	result/M0445_e_coli_filtered_folddisco_Folddisco.tsv
query/M-CSA/single/M0445.txt	e_coli_filtered_folddisco	12	--covered-node-ratio 0.75 --skip-match	Folddisco_prefilter	0.022	2	result/M0445_e_coli_filtered_folddisco_Folddisco_prefilter.tsv
query/M-CSA/single/M0446.txt	e_coli_filtered_folddisco	12	--covered-node-ratio 0.75 --rmsd 2.0	Folddisco	0.048	16	result/M0446_e_coli_filtered_folddisco_Folddisco.tsv
query/M-CSA/single/M0446.txt	e_coli_filtered_folddisco	12	--covered-node-ratio 0.75 --skip-match	Folddisco_prefilter	0.013	9	result/M0446_e_coli_filtered_folddisco_Folddisco_prefilter.tsv
query/M-CSA/single/M0447.txt	e_coli_filtered_folddisco	12	--covered-node-ratio 0.75 --rmsd 2.0	Folddisco	0.049	12	result/M0447_e_coli_filtered_folddisco_Folddisco.tsv
query/M-CSA/single/M0447.txt	e_coli_filtered_folddisco	12	--covered-node-ratio 0.75 --skip-match	Folddisco_prefilter	0.022	11	result/M0447_e_coli_filtered_folddisco_Folddisco_prefilter.tsv
query/M-CSA/single/M0448.txt	e_coli_filtered_folddisco	12	--covered-node-ratio 0.75 --rmsd 2.0	Folddisco	0.028	6	result/M0448_e_coli_filtered_folddisco_Folddisco.tsv
query/M-CSA/single/M0448.txt	e_coli_filtered_folddisco	12	--covered-node-ratio 0.75 --skip-match	Folddisco_prefilter	0.013	3	result/M0448_e_coli_filtered_folddisco_Folddisco_prefilter.tsv
query/M-CSA/single/M0449.txt	e_coli_filtered_folddisco	12	--covered-node-ratio 0.75 --rmsd 2.0	Folddisco	0.019	0	result/M0449_e_coli_filtered_folddisco_Folddisco.tsv
query/M-CSA/single/M0449.txt	e_coli_filtered_folddisco	12	--covered-node-ratio 0.75 --skip-match	Folddisco_prefilter	0.016	0	result/M0449_e_coli_filtered_folddisco_Folddisco_prefilter.tsv
query/M-CSA/single/M0450.txt	e_coli_filtered_folddisco	12	--covered-node-ratio 0.75 --rmsd 2.0	Folddisco	0.023	0	result/M0450_e_coli_filtered_folddisco_Folddisco.tsv
query/M-CSA/single/M0450.txt	e_coli_filtered_folddisco	12	--covered-node-ratio 0.75 --skip-match	Folddisco_prefilter	0.016	0	result/M0450_e_coli_filtered_folddisco_Folddisco_prefilter.tsv
query/M-CSA/single/M0451.txt	e_coli_filtered_folddisco	12	--covered-node-ratio 0.75 --rmsd 2.0	Folddisco	0.051	2	result/M0451_e_coli_filtered_folddisco_Folddisco.tsv
query/M-CSA/single/M0451.txt	e_coli_filtered_folddisco	12	--covered-node-ratio 0.75 --skip-match	Folddisco_prefilter	0.022	5	result/M0451_e_coli_filtered_folddisco_Folddisco_prefilter.tsv
query/M-CSA/single/M0453.txt	e_coli_filtered_folddisco	12	--covered-node-ratio 0.75 --rmsd 2.0	Folddisco	0.024	0	result/M0453_e_coli_filtered_folddisco_Folddisco.tsv
query/M-CSA/single/M0453.txt	e_coli_filtered_folddisco	12	--covered-node-ratio 0.75 --skip-match	Folddisco_prefilter	0.016	1	result/M0453_e_coli_filtered_folddisco_Folddisco_prefilter.tsv
query/M-CSA/single/M0454.txt	e_coli_filtered_folddisco	12	--covered-node-ratio 0.75 --rmsd 2.0	Folddisco	0.046	8	result/M0454_e_coli_filtered_folddisco_Folddisco.tsv
query/M-CSA/single/M0454.txt	e_coli_filtered_folddisco	12	--covered-node-ratio 0.75 --skip-match	Folddisco_prefilter	0.013	9	result/M0454_e_coli_filtered_folddisco_Folddisco_prefilter.tsv
query/M-CSA/single/M0455.txt	e_coli_filtered_folddisco	12	--covered-node-ratio 0.75 --rmsd 2.0	Folddisco	0.026	2	result/M0455_e_coli_filtered_folddisco_Folddisco.tsv
query/M-CSA/single/M0455.txt	e_coli_filtered_folddisco	12	--covered-node-ratio 0.75 --skip-match	Folddisco_prefilter	0.016	1	result/M0455_e_coli_filtered_folddisco_Folddisco_prefilter.tsv
query/M-CSA/single/M0456.txt	e_coli_filtered_folddisco	12	--covered-node-ratio 0.75 --rmsd 2.0	Folddisco	0.016	0	result/M0456_e_coli_filtered_folddisco_Folddisco.tsv
query/M-CSA/single/M0456.txt	e_coli_filtered_folddisco	12	--covered-node-ratio 0.75 --skip-match	Folddisco_prefilter	0.011	0	result/M0456_e_coli_filtered_folddisco_Folddisco_prefilter.tsv
query/M-CSA/single/M0457.txt	e_coli_filtered_folddisco	12	--covered-node-ratio 0.75 --rmsd 2.0	Folddisco	0.022	4	result/M0457_e_coli_filtered_folddisco_Folddisco.tsv
query/M-CSA/single/M0457.txt	e_coli_filtered_folddisco	12	--covered-node-ratio 0.75 --skip-match	Folddisco_prefilter	0.014	2	result/M0457_e_coli_filtered_folddisco_Folddisco_prefilter.tsv
query/M-CSA/single/M0458.txt	e_coli_filtered_folddisco	12	--covered-node-ratio 0.75 --rmsd 2.0	Folddisco	0.022	3	result/M0458_e_coli_filtered_folddisco_Folddisco.tsv
query/M-CSA/single/M0458.txt	e_coli_filtered_folddisco	12	--covered-node-ratio 0.75 --skip-match	Folddisco_prefilter	0.014	2	result/M0458_e_coli_filtered_folddisco_Folddisco_prefilter.tsv
query/M-CSA/single/M0459.txt	e_coli_filtered_folddisco	12	--covered-node-ratio 0.75 --rmsd 2.0	Folddisco	0.042	11	result/M0459_e_coli_filtered_folddisco_Folddisco.tsv
query/M-CSA/single/M0459.txt	e_coli_filtered_folddisco	12	--covered-node-ratio 0.75 --skip-match	Folddisco_prefilter	0.013	7	result/M0459_e_coli_filtered_folddisco_Folddisco_prefilter.tsv
query/M-CSA/single/M0460.txt	e_coli_filtered_folddisco	12	--covered-node-ratio 0.75 --rmsd 2.0	Folddisco	0.056	28	result/M0460_e_coli_filtered_folddisco_Folddisco.tsv
query/M-CSA/single/M0460.txt	e_coli_filtered_folddisco	12	--covered-node-ratio 0.75 --skip-match	Folddisco_prefilter	0.016	9	result/M0460_e_coli_filtered_folddisco_Folddisco_prefilter.tsv
query/M-CSA/single/M0461.txt	e_coli_filtered_folddisco	12	--covered-node-ratio 0.75 --rmsd 2.0	Folddisco	0.066	44	result/M0461_e_coli_filtered_folddisco_Folddisco.tsv
query/M-CSA/single/M0461.txt	e_coli_filtered_folddisco	12	--covered-node-ratio 0.75 --skip-match	Folddisco_prefilter	0.027	24	result/M0461_e_coli_filtered_folddisco_Folddisco_prefilter.tsv
query/M-CSA/single/M0462.txt	e_coli_filtered_folddisco	12	--covered-node-ratio 0.75 --rmsd 2.0	Folddisco	0.027	14	result/M0462_e_coli_filtered_folddisco_Folddisco.tsv
query/M-CSA/single/M0462.txt	e_coli_filtered_folddisco	12	--covered-node-ratio 0.75 --skip-match	Folddisco_prefilter	0.014	5	result/M0462_e_coli_filtered_folddisco_Folddisco_prefilter.tsv
query/M-CSA/single/M0463.txt	e_coli_filtered_folddisco	12	--covered-node-ratio 0.75 --rmsd 2.0	Folddisco	0.06	0	result/M0463_e_coli_filtered_folddisco_Folddisco.tsv
query/M-CSA/single/M0463.txt	e_coli_filtered_folddisco	12	--covered-node-ratio 0.75 --skip-match	Folddisco_prefilter	0.042	4	result/M0463_e_coli_filtered_folddisco_Folddisco_prefilter.tsv
query/M-CSA/single/M0464.txt	e_coli_filtered_folddisco	12	--covered-node-ratio 0.75 --rmsd 2.0	Folddisco	0.03	0	result/M0464_e_coli_filtered_folddisco_Folddisco.tsv
query/M-CSA/single/M0464.txt	e_coli_filtered_folddisco	12	--covered-node-ratio 0.75 --skip-match	Folddisco_prefilter	0.017	4	result/M0464_e_coli_filtered_folddisco_Folddisco_prefilter.tsv
query/M-CSA/single/M0465.txt	e_coli_filtered_folddisco	12	--covered-node-ratio 0.75 --rmsd 2.0	Folddisco	0.036	0	result/M0465_e_coli_filtered_folddisco_Folddisco.tsv
query/M-CSA/single/M0465.txt	e_coli_filtered_folddisco	12	--covered-node-ratio 0.75 --skip-match	Folddisco_prefilter	0.013	1	result/M0465_e_coli_filtered_folddisco_Folddisco_prefilter.tsv
query/M-CSA/single/M0466.txt	e_coli_filtered_folddisco	12	--covered-node-ratio 0.75 --rmsd 2.0	Folddisco	0.021	0	result/M0466_e_coli_filtered_folddisco_Folddisco.tsv
query/M-CSA/single/M0466.txt	e_coli_filtered_folddisco	12	--covered-node-ratio 0.75 --skip-match	Folddisco_prefilter	0.018	0	result/M0466_e_coli_filtered_folddisco_Folddisco_prefilter.tsv
query/M-CSA/single/M0467.txt	e_coli_filtered_folddisco	12	--covered-node-ratio 0.75 --rmsd 2.0	Folddisco	0.023	6	result/M0467_e_coli_filtered_folddisco_Folddisco.tsv
query/M-CSA/single/M0467.txt	e_coli_filtered_folddisco	12	--covered-node-ratio 0.75 --skip-match	Folddisco_prefilter	0.012	3	result/M0467_e_coli_filtered_folddisco_Folddisco_prefilter.tsv
query/M-CSA/single/M0468.txt	e_coli_filtered_folddisco	12	--covered-node-ratio 0.75 --rmsd 2.0	Folddisco	0.03	0	result/M0468_e_coli_filtered_folddisco_Folddisco.tsv
query/M-CSA/single/M0468.txt	e_coli_filtered_folddisco	12	--covered-node-ratio 0.75 --skip-match	Folddisco_prefilter	0.014	1	result/M0468_e_coli_filtered_folddisco_Folddisco_prefilter.tsv
query/M-CSA/single/M0469.txt	e_coli_filtered_folddisco	12	--covered-node-ratio 0.75 --rmsd 2.0	Folddisco	0.033	16	result/M0469_e_coli_filtered_folddisco_Folddisco.tsv
query/M-CSA/single/M0469.txt	e_coli_filtered_folddisco	12	--covered-node-ratio 0.75 --skip-match	Folddisco_prefilter	0.015	10	result/M0469_e_coli_filtered_folddisco_Folddisco_prefilter.tsv
query/M-CSA/single/M0470.txt	e_coli_filtered_folddisco	12	--covered-node-ratio 0.75 --rmsd 2.0	Folddisco	0.155	594	result/M0470_e_coli_filtered_folddisco_Folddisco.tsv
query/M-CSA/single/M0470.txt	e_coli_filtered_folddisco	12	--covered-node-ratio 0.75 --skip-match	Folddisco_prefilter	0.017	525	result/M0470_e_coli_filtered_folddisco_Folddisco_prefilter.tsv
query/M-CSA/single/M0471.txt	e_coli_filtered_folddisco	12	--covered-node-ratio 0.75 --rmsd 2.0	Folddisco	0.018	0	result/M0471_e_coli_filtered_folddisco_Folddisco.tsv
query/M-CSA/single/M0471.txt	e_coli_filtered_folddisco	12	--covered-node-ratio 0.75 --skip-match	Folddisco_prefilter	0.017	0	result/M0471_e_coli_filtered_folddisco_Folddisco_prefilter.tsv
query/M-CSA/single/M0472.txt	e_coli_filtered_folddisco	12	--covered-node-ratio 0.75 --rmsd 2.0	Folddisco	0.041	2	result/M0472_e_coli_filtered_folddisco_Folddisco.tsv
query/M-CSA/single/M0472.txt	e_coli_filtered_folddisco	12	--covered-node-ratio 0.75 --skip-match	Folddisco_prefilter	0.018	5	result/M0472_e_coli_filtered_folddisco_Folddisco_prefilter.tsv
query/M-CSA/single/M0473.txt	e_coli_filtered_folddisco	12	--covered-node-ratio 0.75 --rmsd 2.0	Folddisco	0.017	0	result/M0473_e_coli_filtered_folddisco_Folddisco.tsv
query/M-CSA/single/M0473.txt	e_coli_filtered_folddisco	12	--covered-node-ratio 0.75 --skip-match	Folddisco_prefilter	0.013	0	result/M0473_e_coli_filtered_folddisco_Folddisco_prefilter.tsv
query/M-CSA/single/M0474.txt	e_coli_filtered_folddisco	12	--covered-node-ratio 0.75 --rmsd 2.0	Folddisco	0.02	0	result/M0474_e_coli_filtered_folddisco_Folddisco.tsv
query/M-CSA/single/M0474.txt	e_coli_filtered_folddisco	12	--covered-node-ratio 0.75 --skip-match	Folddisco_prefilter	0.016	0	result/M0474_e_coli_filtered_folddisco_Folddisco_prefilter.tsv
query/M-CSA/single/M0475.txt	e_coli_filtered_folddisco	12	--covered-node-ratio 0.75 --rmsd 2.0	Folddisco	0.053	50	result/M0475_e_coli_filtered_folddisco_Folddisco.tsv
query/M-CSA/single/M0475.txt	e_coli_filtered_folddisco	12	--covered-node-ratio 0.75 --skip-match	Folddisco_prefilter	0.013	50	result/M0475_e_coli_filtered_folddisco_Folddisco_prefilter.tsv
query/M-CSA/single/M0476.txt	e_coli_filtered_folddisco	12	--covered-node-ratio 0.75 --rmsd 2.0	Folddisco	0.018	0	result/M0476_e_coli_filtered_folddisco_Folddisco.tsv
query/M-CSA/single/M0476.txt	e_coli_filtered_folddisco	12	--covered-node-ratio 0.75 --skip-match	Folddisco_prefilter	0.016	0	result/M0476_e_coli_filtered_folddisco_Folddisco_prefilter.tsv
query/M-CSA/single/M0477.txt	e_coli_filtered_folddisco	12	--covered-node-ratio 0.75 --rmsd 2.0	Folddisco	0.043	38	result/M0477_e_coli_filtered_folddisco_Folddisco.tsv
query/M-CSA/single/M0477.txt	e_coli_filtered_folddisco	12	--covered-node-ratio 0.75 --skip-match	Folddisco_prefilter	0.012	19	result/M0477_e_coli_filtered_folddisco_Folddisco_prefilter.tsv
query/M-CSA/single/M0478.txt	e_coli_filtered_folddisco	12	--covered-node-ratio 0.75 --rmsd 2.0	Folddisco	0.097	186	result/M0478_e_coli_filtered_folddisco_Folddisco.tsv
query/M-CSA/single/M0478.txt	e_coli_filtered_folddisco	12	--covered-node-ratio 0.75 --skip-match	Folddisco_prefilter	0.015	140	result/M0478_e_coli_filtered_folddisco_Folddisco_prefilter.tsv
query/M-CSA/single/M0479.txt	e_coli_filtered_folddisco	12	--covered-node-ratio 0.75 --rmsd 2.0	Folddisco	0.023	1	result/M0479_e_coli_filtered_folddisco_Folddisco.tsv
query/M-CSA/single/M0479.txt	e_coli_filtered_folddisco	12	--covered-node-ratio 0.75 --skip-match	Folddisco_prefilter	0.013	1	result/M0479_e_coli_filtered_folddisco_Folddisco_prefilter.tsv
query/M-CSA/single/M0480.txt	e_coli_filtered_folddisco	12	--covered-node-ratio 0.75 --rmsd 2.0	Folddisco	0.023	5	result/M0480_e_coli_filtered_folddisco_Folddisco.tsv
query/M-CSA/single/M0480.txt	e_coli_filtered_folddisco	12	--covered-node-ratio 0.75 --skip-match	Folddisco_prefilter	0.015	3	result/M0480_e_coli_filtered_folddisco_Folddisco_prefilter.tsv
query/M-CSA/single/M0481.txt	e_coli_filtered_folddisco	12	--covered-node-ratio 0.75 --rmsd 2.0	Folddisco	0.025	2	result/M0481_e_coli_filtered_folddisco_Folddisco.tsv
query/M-CSA/single/M0481.txt	e_coli_filtered_folddisco	12	--covered-node-ratio 0.75 --skip-match	Folddisco_prefilter	0.022	1	result/M0481_e_coli_filtered_folddisco_Folddisco_prefilter.tsv
query/M-CSA/single/M0482.txt	e_coli_filtered_folddisco	12	--covered-node-ratio 0.75 --rmsd 2.0	Folddisco	0.017	0	result/M0482_e_coli_filtered_folddisco_Folddisco.tsv
query/M-CSA/single/M0482.txt	e_coli_filtered_folddisco	12	--covered-node-ratio 0.75 --skip-match	Folddisco_prefilter	0.013	0	result/M0482_e_coli_filtered_folddisco_Folddisco_prefilter.tsv
query/M-CSA/single/M0483.txt	e_coli_filtered_folddisco	12	--covered-node-ratio 0.75 --rmsd 2.0	Folddisco	0.026	0	result/M0483_e_coli_filtered_folddisco_Folddisco.tsv
query/M-CSA/single/M0483.txt	e_coli_filtered_folddisco	12	--covered-node-ratio 0.75 --skip-match	Folddisco_prefilter	0.013	2	result/M0483_e_coli_filtered_folddisco_Folddisco_prefilter.tsv
query/M-CSA/single/M0484.txt	e_coli_filtered_folddisco	12	--covered-node-ratio 0.75 --rmsd 2.0	Folddisco	0.02	0	result/M0484_e_coli_filtered_folddisco_Folddisco.tsv
query/M-CSA/single/M0484.txt	e_coli_filtered_folddisco	12	--covered-node-ratio 0.75 --skip-match	Folddisco_prefilter	0.018	0	result/M0484_e_coli_filtered_folddisco_Folddisco_prefilter.tsv
query/M-CSA/single/M0485.txt	e_coli_filtered_folddisco	12	--covered-node-ratio 0.75 --rmsd 2.0	Folddisco	0.171	815	result/M0485_e_coli_filtered_folddisco_Folddisco.tsv
query/M-CSA/single/M0485.txt	e_coli_filtered_folddisco	12	--covered-node-ratio 0.75 --skip-match	Folddisco_prefilter	0.015	699	result/M0485_e_coli_filtered_folddisco_Folddisco_prefilter.tsv
query/M-CSA/single/M0486.txt	e_coli_filtered_folddisco	12	--covered-node-ratio 0.75 --rmsd 2.0	Folddisco	0.036	0	result/M0486_e_coli_filtered_folddisco_Folddisco.tsv
query/M-CSA/single/M0486.txt	e_coli_filtered_folddisco	12	--covered-node-ratio 0.75 --skip-match	Folddisco_prefilter	0.014	5	result/M0486_e_coli_filtered_folddisco_Folddisco_prefilter.tsv
query/M-CSA/single/M0487.txt	e_coli_filtered_folddisco	12	--covered-node-ratio 0.75 --rmsd 2.0	Folddisco	0.088	328	result/M0487_e_coli_filtered_folddisco_Folddisco.tsv
query/M-CSA/single/M0487.txt	e_coli_filtered_folddisco	12	--covered-node-ratio 0.75 --skip-match	Folddisco_prefilter	0.013	140	result/M0487_e_coli_filtered_folddisco_Folddisco_prefilter.tsv
query/M-CSA/single/M0488.txt	e_coli_filtered_folddisco	12	--covered-node-ratio 0.75 --rmsd 2.0	Folddisco	0.029	1	result/M0488_e_coli_filtered_folddisco_Folddisco.tsv
query/M-CSA/single/M0488.txt	e_coli_filtered_folddisco	12	--covered-node-ratio 0.75 --skip-match	Folddisco_prefilter	0.02	1	result/M0488_e_coli_filtered_folddisco_Folddisco_prefilter.tsv
query/M-CSA/single/M0490.txt	e_coli_filtered_folddisco	12	--covered-node-ratio 0.75 --rmsd 2.0	Folddisco	0.06	80	result/M0490_e_coli_filtered_folddisco_Folddisco.tsv
query/M-CSA/single/M0490.txt	e_coli_filtered_folddisco	12	--covered-node-ratio 0.75 --skip-match	Folddisco_prefilter	0.013	78	result/M0490_e_coli_filtered_folddisco_Folddisco_prefilter.tsv
query/M-CSA/single/M0491.txt	e_coli_filtered_folddisco	12	--covered-node-ratio 0.75 --rmsd 2.0	Folddisco	0.143	598	result/M0491_e_coli_filtered_folddisco_Folddisco.tsv
query/M-CSA/single/M0491.txt	e_coli_filtered_folddisco	12	--covered-node-ratio 0.75 --skip-match	Folddisco_prefilter	0.015	529	result/M0491_e_coli_filtered_folddisco_Folddisco_prefilter.tsv
query/M-CSA/single/M0492.txt	e_coli_filtered_folddisco	12	--covered-node-ratio 0.75 --rmsd 2.0	Folddisco	0.034	3	result/M0492_e_coli_filtered_folddisco_Folddisco.tsv
query/M-CSA/single/M0492.txt	e_coli_filtered_folddisco	12	--covered-node-ratio 0.75 --skip-match	Folddisco_prefilter	0.016	1	result/M0492_e_coli_filtered_folddisco_Folddisco_prefilter.tsv
query/M-CSA/single/M0493.txt	e_coli_filtered_folddisco	12	--covered-node-ratio 0.75 --rmsd 2.0	Folddisco	0.037	22	result/M0493_e_coli_filtered_folddisco_Folddisco.tsv
query/M-CSA/single/M0493.txt	e_coli_filtered_folddisco	12	--covered-node-ratio 0.75 --skip-match	Folddisco_prefilter	0.014	14	result/M0493_e_coli_filtered_folddisco_Folddisco_prefilter.tsv
query/M-CSA/single/M0494.txt	e_coli_filtered_folddisco	12	--covered-node-ratio 0.75 --rmsd 2.0	Folddisco	0.02	0	result/M0494_e_coli_filtered_folddisco_Folddisco.tsv
query/M-CSA/single/M0494.txt	e_coli_filtered_folddisco	12	--covered-node-ratio 0.75 --skip-match	Folddisco_prefilter	0.019	0	result/M0494_e_coli_filtered_folddisco_Folddisco_prefilter.tsv
query/M-CSA/single/M0495.txt	e_coli_filtered_folddisco	12	--covered-node-ratio 0.75 --rmsd 2.0	Folddisco	0.015	0	result/M0495_e_coli_filtered_folddisco_Folddisco.tsv
query/M-CSA/single/M0495.txt	e_coli_filtered_folddisco	12	--covered-node-ratio 0.75 --skip-match	Folddisco_prefilter	0.012	0	result/M0495_e_coli_filtered_folddisco_Folddisco_prefilter.tsv
query/M-CSA/single/M0496.txt	e_coli_filtered_folddisco	12	--covered-node-ratio 0.75 --rmsd 2.0	Folddisco	0.016	0	result/M0496_e_coli_filtered_folddisco_Folddisco.tsv
query/M-CSA/single/M0496.txt	e_coli_filtered_folddisco	12	--covered-node-ratio 0.75 --skip-match	Folddisco_prefilter	0.011	0	result/M0496_e_coli_filtered_folddisco_Folddisco_prefilter.tsv
query/M-CSA/single/M0497.txt	e_coli_filtered_folddisco	12	--covered-node-ratio 0.75 --rmsd 2.0	Folddisco	0.041	5	result/M0497_e_coli_filtered_folddisco_Folddisco.tsv
query/M-CSA/single/M0497.txt	e_coli_filtered_folddisco	12	--covered-node-ratio 0.75 --skip-match	Folddisco_prefilter	0.019	4	result/M0497_e_coli_filtered_folddisco_Folddisco_prefilter.tsv
query/M-CSA/single/M0498.txt	e_coli_filtered_folddisco	12	--covered-node-ratio 0.75 --rmsd 2.0	Folddisco	0.109	7	result/M0498_e_coli_filtered_folddisco_Folddisco.tsv
query/M-CSA/single/M0498.txt	e_coli_filtered_folddisco	12	--covered-node-ratio 0.75 --skip-match	Folddisco_prefilter	0.017	20	result/M0498_e_coli_filtered_folddisco_Folddisco_prefilter.tsv
query/M-CSA/single/M0499.txt	e_coli_filtered_folddisco	12	--covered-node-ratio 0.75 --rmsd 2.0	Folddisco	0.055	41	result/M0499_e_coli_filtered_folddisco_Folddisco.tsv
query/M-CSA/single/M0499.txt	e_coli_filtered_folddisco	12	--covered-node-ratio 0.75 --skip-match	Folddisco_prefilter	0.016	20	result/M0499_e_coli_filtered_folddisco_Folddisco_prefilter.tsv
query/M-CSA/single/M0500.txt	e_coli_filtered_folddisco	12	--covered-node-ratio 0.75 --rmsd 2.0	Folddisco	0.042	14	result/M0500_e_coli_filtered_folddisco_Folddisco.tsv
query/M-CSA/single/M0500.txt	e_coli_filtered_folddisco	12	--covered-node-ratio 0.75 --skip-match	Folddisco_prefilter	0.018	7	result/M0500_e_coli_filtered_folddisco_Folddisco_prefilter.tsv
query/M-CSA/single/M0501.txt	e_coli_filtered_folddisco	12	--covered-node-ratio 0.75 --rmsd 2.0	Folddisco	0.015	0	result/M0501_e_coli_filtered_folddisco_Folddisco.tsv
query/M-CSA/single/M0501.txt	e_coli_filtered_folddisco	12	--covered-node-ratio 0.75 --skip-match	Folddisco_prefilter	0.01	0	result/M0501_e_coli_filtered_folddisco_Folddisco_prefilter.tsv
query/M-CSA/single/M0502.txt	e_coli_filtered_folddisco	12	--covered-node-ratio 0.75 --rmsd 2.0	Folddisco	0.021	0	result/M0502_e_coli_filtered_folddisco_Folddisco.tsv
query/M-CSA/single/M0502.txt	e_coli_filtered_folddisco	12	--covered-node-ratio 0.75 --skip-match	Folddisco_prefilter	0.016	0	result/M0502_e_coli_filtered_folddisco_Folddisco_prefilter.tsv
query/M-CSA/single/M0503.txt	e_coli_filtered_folddisco	12	--covered-node-ratio 0.75 --rmsd 2.0	Folddisco	0.026	2	result/M0503_e_coli_filtered_folddisco_Folddisco.tsv
query/M-CSA/single/M0503.txt	e_coli_filtered_folddisco	12	--covered-node-ratio 0.75 --skip-match	Folddisco_prefilter	0.015	4	result/M0503_e_coli_filtered_folddisco_Folddisco_prefilter.tsv
query/M-CSA/single/M0504.txt	e_coli_filtered_folddisco	12	--covered-node-ratio 0.75 --rmsd 2.0	Folddisco	0.022	3	result/M0504_e_coli_filtered_folddisco_Folddisco.tsv
query/M-CSA/single/M0504.txt	e_coli_filtered_folddisco	12	--covered-node-ratio 0.75 --skip-match	Folddisco_prefilter	0.013	3	result/M0504_e_coli_filtered_folddisco_Folddisco_prefilter.tsv
query/M-CSA/single/M0505.txt	e_coli_filtered_folddisco	12	--covered-node-ratio 0.75 --rmsd 2.0	Folddisco	0.038	9	result/M0505_e_coli_filtered_folddisco_Folddisco.tsv
query/M-CSA/single/M0505.txt	e_coli_filtered_folddisco	12	--covered-node-ratio 0.75 --skip-match	Folddisco_prefilter	0.015	2	result/M0505_e_coli_filtered_folddisco_Folddisco_prefilter.tsv
query/M-CSA/single/M0506.txt	e_coli_filtered_folddisco	12	--covered-node-ratio 0.75 --rmsd 2.0	Folddisco	0.058	62	result/M0506_e_coli_filtered_folddisco_Folddisco.tsv
query/M-CSA/single/M0506.txt	e_coli_filtered_folddisco	12	--covered-node-ratio 0.75 --skip-match	Folddisco_prefilter	0.013	43	result/M0506_e_coli_filtered_folddisco_Folddisco_prefilter.tsv
query/M-CSA/single/M0507.txt	e_coli_filtered_folddisco	12	--covered-node-ratio 0.75 --rmsd 2.0	Folddisco	0.149	748	result/M0507_e_coli_filtered_folddisco_Folddisco.tsv
query/M-CSA/single/M0507.txt	e_coli_filtered_folddisco	12	--covered-node-ratio 0.75 --skip-match	Folddisco_prefilter	0.025	312	result/M0507_e_coli_filtered_folddisco_Folddisco_prefilter.tsv
query/M-CSA/single/M0508.txt	e_coli_filtered_folddisco	12	--covered-node-ratio 0.75 --rmsd 2.0	Folddisco	0.016	0	result/M0508_e_coli_filtered_folddisco_Folddisco.tsv
query/M-CSA/single/M0508.txt	e_coli_filtered_folddisco	12	--covered-node-ratio 0.75 --skip-match	Folddisco_prefilter	0.011	0	result/M0508_e_coli_filtered_folddisco_Folddisco_prefilter.tsv
query/M-CSA/single/M0509.txt	e_coli_filtered_folddisco	12	--covered-node-ratio 0.75 --rmsd 2.0	Folddisco	0.045	41	result/M0509_e_coli_filtered_folddisco_Folddisco.tsv
query/M-CSA/single/M0509.txt	e_coli_filtered_folddisco	12	--covered-node-ratio 0.75 --skip-match	Folddisco_prefilter	0.013	41	result/M0509_e_coli_filtered_folddisco_Folddisco_prefilter.tsv
query/M-CSA/single/M0510.txt	e_coli_filtered_folddisco	12	--covered-node-ratio 0.75 --rmsd 2.0	Folddisco	0.025	10	result/M0510_e_coli_filtered_folddisco_Folddisco.tsv
query/M-CSA/single/M0510.txt	e_coli_filtered_folddisco	12	--covered-node-ratio 0.75 --skip-match	Folddisco_prefilter	0.011	8	result/M0510_e_coli_filtered_folddisco_Folddisco_prefilter.tsv
query/M-CSA/single/M0511.txt	e_coli_filtered_folddisco	12	--covered-node-ratio 0.75 --rmsd 2.0	Folddisco	0.016	0	result/M0511_e_coli_filtered_folddisco_Folddisco.tsv
query/M-CSA/single/M0511.txt	e_coli_filtered_folddisco	12	--covered-node-ratio 0.75 --skip-match	Folddisco_prefilter	0.01	0	result/M0511_e_coli_filtered_folddisco_Folddisco_prefilter.tsv
query/M-CSA/single/M0512.txt	e_coli_filtered_folddisco	12	--covered-node-ratio 0.75 --rmsd 2.0	Folddisco	0.025	11	result/M0512_e_coli_filtered_folddisco_Folddisco.tsv
query/M-CSA/single/M0512.txt	e_coli_filtered_folddisco	12	--covered-node-ratio 0.75 --skip-match	Folddisco_prefilter	0.011	10	result/M0512_e_coli_filtered_folddisco_Folddisco_prefilter.tsv
query/M-CSA/single/M0513.txt	e_coli_filtered_folddisco	12	--covered-node-ratio 0.75 --rmsd 2.0	Folddisco	0.017	1	result/M0513_e_coli_filtered_folddisco_Folddisco.tsv
query/M-CSA/single/M0513.txt	e_coli_filtered_folddisco	12	--covered-node-ratio 0.75 --skip-match	Folddisco_prefilter	0.01	1	result/M0513_e_coli_filtered_folddisco_Folddisco_prefilter.tsv
query/M-CSA/single/M0514.txt	e_coli_filtered_folddisco	12	--covered-node-ratio 0.75 --rmsd 2.0	Folddisco	0.068	296	result/M0514_e_coli_filtered_folddisco_Folddisco.tsv
query/M-CSA/single/M0514.txt	e_coli_filtered_folddisco	12	--covered-node-ratio 0.75 --skip-match	Folddisco_prefilter	0.013	139	result/M0514_e_coli_filtered_folddisco_Folddisco_prefilter.tsv
query/M-CSA/single/M0515.txt	e_coli_filtered_folddisco	12	--covered-node-ratio 0.75 --rmsd 2.0	Folddisco	0.031	9	result/M0515_e_coli_filtered_folddisco_Folddisco.tsv
query/M-CSA/single/M0515.txt	e_coli_filtered_folddisco	12	--covered-node-ratio 0.75 --skip-match	Folddisco_prefilter	0.018	5	result/M0515_e_coli_filtered_folddisco_Folddisco_prefilter.tsv
query/M-CSA/single/M0516.txt	e_coli_filtered_folddisco	12	--covered-node-ratio 0.75 --rmsd 2.0	Folddisco	0.014	0	result/M0516_e_coli_filtered_folddisco_Folddisco.tsv
query/M-CSA/single/M0516.txt	e_coli_filtered_folddisco	12	--covered-node-ratio 0.75 --skip-match	Folddisco_prefilter	0.01	0	result/M0516_e_coli_filtered_folddisco_Folddisco_prefilter.tsv
query/M-CSA/single/M0517.txt	e_coli_filtered_folddisco	12	--covered-node-ratio 0.75 --rmsd 2.0	Folddisco	0.042	40	result/M0517_e_coli_filtered_folddisco_Folddisco.tsv
query/M-CSA/single/M0517.txt	e_coli_filtered_folddisco	12	--covered-node-ratio 0.75 --skip-match	Folddisco_prefilter	0.012	40	result/M0517_e_coli_filtered_folddisco_Folddisco_prefilter.tsv
query/M-CSA/single/M0518.txt	e_coli_filtered_folddisco	12	--covered-node-ratio 0.75 --rmsd 2.0	Folddisco	0.054	21	result/M0518_e_coli_filtered_folddisco_Folddisco.tsv
query/M-CSA/single/M0518.txt	e_coli_filtered_folddisco	12	--covered-node-ratio 0.75 --skip-match	Folddisco_prefilter	0.011	14	result/M0518_e_coli_filtered_folddisco_Folddisco_prefilter.tsv
query/M-CSA/single/M0519.txt	e_coli_filtered_folddisco	12	--covered-node-ratio 0.75 --rmsd 2.0	Folddisco	0.088	0	result/M0519_e_coli_filtered_folddisco_Folddisco.tsv
query/M-CSA/single/M0519.txt	e_coli_filtered_folddisco	12	--covered-node-ratio 0.75 --skip-match	Folddisco_prefilter	0.02	12	result/M0519_e_coli_filtered_folddisco_Folddisco_prefilter.tsv
query/M-CSA/single/M0520.txt	e_coli_filtered_folddisco	12	--covered-node-ratio 0.75 --rmsd 2.0	Folddisco	0.043	9	result/M0520_e_coli_filtered_folddisco_Folddisco.tsv
query/M-CSA/single/M0520.txt	e_coli_filtered_folddisco	12	--covered-node-ratio 0.75 --skip-match	Folddisco_prefilter	0.013	7	result/M0520_e_coli_filtered_folddisco_Folddisco_prefilter.tsv
query/M-CSA/single/M0521.txt	e_coli_filtered_folddisco	12	--covered-node-ratio 0.75 --rmsd 2.0	Folddisco	0.199	1066	result/M0521_e_coli_filtered_folddisco_Folddisco.tsv
query/M-CSA/single/M0521.txt	e_coli_filtered_folddisco	12	--covered-node-ratio 0.75 --skip-match	Folddisco_prefilter	0.021	864	result/M0521_e_coli_filtered_folddisco_Folddisco_prefilter.tsv
query/M-CSA/single/M0522.txt	e_coli_filtered_folddisco	12	--covered-node-ratio 0.75 --rmsd 2.0	Folddisco	0.021	3	result/M0522_e_coli_filtered_folddisco_Folddisco.tsv
query/M-CSA/single/M0522.txt	e_coli_filtered_folddisco	12	--covered-node-ratio 0.75 --skip-match	Folddisco_prefilter	0.012	3	result/M0522_e_coli_filtered_folddisco_Folddisco_prefilter.tsv
query/M-CSA/single/M0523.txt	e_coli_filtered_folddisco	12	--covered-node-ratio 0.75 --rmsd 2.0	Folddisco	0.07	22	result/M0523_e_coli_filtered_folddisco_Folddisco.tsv
query/M-CSA/single/M0523.txt	e_coli_filtered_folddisco	12	--covered-node-ratio 0.75 --skip-match	Folddisco_prefilter	0.013	13	result/M0523_e_coli_filtered_folddisco_Folddisco_prefilter.tsv
query/M-CSA/single/M0524.txt	e_coli_filtered_folddisco	12	--covered-node-ratio 0.75 --rmsd 2.0	Folddisco	0.072	18	result/M0524_e_coli_filtered_folddisco_Folddisco.tsv
query/M-CSA/single/M0524.txt	e_coli_filtered_folddisco	12	--covered-node-ratio 0.75 --skip-match	Folddisco_prefilter	0.019	20	result/M0524_e_coli_filtered_folddisco_Folddisco_prefilter.tsv
query/M-CSA/single/M0525.txt	e_coli_filtered_folddisco	12	--covered-node-ratio 0.75 --rmsd 2.0	Folddisco	0.029	12	result/M0525_e_coli_filtered_folddisco_Folddisco.tsv
query/M-CSA/single/M0525.txt	e_coli_filtered_folddisco	12	--covered-node-ratio 0.75 --skip-match	Folddisco_prefilter	0.012	12	result/M0525_e_coli_filtered_folddisco_Folddisco_prefilter.tsv
query/M-CSA/single/M0526.txt	e_coli_filtered_folddisco	12	--covered-node-ratio 0.75 --rmsd 2.0	Folddisco	0.031	12	result/M0526_e_coli_filtered_folddisco_Folddisco.tsv
query/M-CSA/single/M0526.txt	e_coli_filtered_folddisco	12	--covered-node-ratio 0.75 --skip-match	Folddisco_prefilter	0.015	12	result/M0526_e_coli_filtered_folddisco_Folddisco_prefilter.tsv
query/M-CSA/single/M0527.txt	e_coli_filtered_folddisco	12	--covered-node-ratio 0.75 --rmsd 2.0	Folddisco	0.031	10	result/M0527_e_coli_filtered_folddisco_Folddisco.tsv
query/M-CSA/single/M0527.txt	e_coli_filtered_folddisco	12	--covered-node-ratio 0.75 --skip-match	Folddisco_prefilter	0.012	10	result/M0527_e_coli_filtered_folddisco_Folddisco_prefilter.tsv
query/M-CSA/single/M0528.txt	e_coli_filtered_folddisco	12	--covered-node-ratio 0.75 --rmsd 2.0	Folddisco	0.038	17	result/M0528_e_coli_filtered_folddisco_Folddisco.tsv
query/M-CSA/single/M0528.txt	e_coli_filtered_folddisco	12	--covered-node-ratio 0.75 --skip-match	Folddisco_prefilter	0.012	17	result/M0528_e_coli_filtered_folddisco_Folddisco_prefilter.tsv
query/M-CSA/single/M0529.txt	e_coli_filtered_folddisco	12	--covered-node-ratio 0.75 --rmsd 2.0	Folddisco	0.079	98	result/M0529_e_coli_filtered_folddisco_Folddisco.tsv
query/M-CSA/single/M0529.txt	e_coli_filtered_folddisco	12	--covered-node-ratio 0.75 --skip-match	Folddisco_prefilter	0.018	58	result/M0529_e_coli_filtered_folddisco_Folddisco_prefilter.tsv
query/M-CSA/single/M0530.txt	e_coli_filtered_folddisco	12	--covered-node-ratio 0.75 --rmsd 2.0	Folddisco	0.032	6	result/M0530_e_coli_filtered_folddisco_Folddisco.tsv
query/M-CSA/single/M0530.txt	e_coli_filtered_folddisco	12	--covered-node-ratio 0.75 --skip-match	Folddisco_prefilter	0.016	3	result/M0530_e_coli_filtered_folddisco_Folddisco_prefilter.tsv
query/M-CSA/single/M0532.txt	e_coli_filtered_folddisco	12	--covered-node-ratio 0.75 --rmsd 2.0	Folddisco	0.015	0	result/M0532_e_coli_filtered_folddisco_Folddisco.tsv
query/M-CSA/single/M0532.txt	e_coli_filtered_folddisco	12	--covered-node-ratio 0.75 --skip-match	Folddisco_prefilter	0.012	0	result/M0532_e_coli_filtered_folddisco_Folddisco_prefilter.tsv
query/M-CSA/single/M0533.txt	e_coli_filtered_folddisco	12	--covered-node-ratio 0.75 --rmsd 2.0	Folddisco	0.029	6	result/M0533_e_coli_filtered_folddisco_Folddisco.tsv
query/M-CSA/single/M0533.txt	e_coli_filtered_folddisco	12	--covered-node-ratio 0.75 --skip-match	Folddisco_prefilter	0.012	3	result/M0533_e_coli_filtered_folddisco_Folddisco_prefilter.tsv
query/M-CSA/single/M0534.txt	e_coli_filtered_folddisco	12	--covered-node-ratio 0.75 --rmsd 2.0	Folddisco	0.022	6	result/M0534_e_coli_filtered_folddisco_Folddisco.tsv
query/M-CSA/single/M0534.txt	e_coli_filtered_folddisco	12	--covered-node-ratio 0.75 --skip-match	Folddisco_prefilter	0.015	3	result/M0534_e_coli_filtered_folddisco_Folddisco_prefilter.tsv
query/M-CSA/single/M0537.txt	e_coli_filtered_folddisco	12	--covered-node-ratio 0.75 --rmsd 2.0	Folddisco	0.06	0	result/M0537_e_coli_filtered_folddisco_Folddisco.tsv
query/M-CSA/single/M0537.txt	e_coli_filtered_folddisco	12	--covered-node-ratio 0.75 --skip-match	Folddisco_prefilter	0.063	0	result/M0537_e_coli_filtered_folddisco_Folddisco_prefilter.tsv
query/M-CSA/single/M0538.txt	e_coli_filtered_folddisco	12	--covered-node-ratio 0.75 --rmsd 2.0	Folddisco	0.016	0	result/M0538_e_coli_filtered_folddisco_Folddisco.tsv
query/M-CSA/single/M0538.txt	e_coli_filtered_folddisco	12	--covered-node-ratio 0.75 --skip-match	Folddisco_prefilter	0.011	0	result/M0538_e_coli_filtered_folddisco_Folddisco_prefilter.tsv
query/M-CSA/single/M0539.txt	e_coli_filtered_folddisco	12	--covered-node-ratio 0.75 --rmsd 2.0	Folddisco	0.017	0	result/M0539_e_coli_filtered_folddisco_Folddisco.tsv
query/M-CSA/single/M0539.txt	e_coli_filtered_folddisco	12	--covered-node-ratio 0.75 --skip-match	Folddisco_prefilter	0.015	0	result/M0539_e_coli_filtered_folddisco_Folddisco_prefilter.tsv
query/M-CSA/single/M0540.txt	e_coli_filtered_folddisco	12	--covered-node-ratio 0.75 --rmsd 2.0	Folddisco	0.019	0	result/M0540_e_coli_filtered_folddisco_Folddisco.tsv
query/M-CSA/single/M0540.txt	e_coli_filtered_folddisco	12	--covered-node-ratio 0.75 --skip-match	Folddisco_prefilter	0.012	0	result/M0540_e_coli_filtered_folddisco_Folddisco_prefilter.tsv
query/M-CSA/single/M0542.txt	e_coli_filtered_folddisco	12	--covered-node-ratio 0.75 --rmsd 2.0	Folddisco	0.026	0	result/M0542_e_coli_filtered_folddisco_Folddisco.tsv
query/M-CSA/single/M0542.txt	e_coli_filtered_folddisco	12	--covered-node-ratio 0.75 --skip-match	Folddisco_prefilter	0.026	0	result/M0542_e_coli_filtered_folddisco_Folddisco_prefilter.tsv
query/M-CSA/single/M0543.txt	e_coli_filtered_folddisco	12	--covered-node-ratio 0.75 --rmsd 2.0	Folddisco	0.047	32	result/M0543_e_coli_filtered_folddisco_Folddisco.tsv
query/M-CSA/single/M0543.txt	e_coli_filtered_folddisco	12	--covered-node-ratio 0.75 --skip-match	Folddisco_prefilter	0.011	32	result/M0543_e_coli_filtered_folddisco_Folddisco_prefilter.tsv
query/M-CSA/single/M0544.txt	e_coli_filtered_folddisco	12	--covered-node-ratio 0.75 --rmsd 2.0	Folddisco	0.023	0	result/M0544_e_coli_filtered_folddisco_Folddisco.tsv
query/M-CSA/single/M0544.txt	e_coli_filtered_folddisco	12	--covered-node-ratio 0.75 --skip-match	Folddisco_prefilter	0.018	0	result/M0544_e_coli_filtered_folddisco_Folddisco_prefilter.tsv
query/M-CSA/single/M0545.txt	e_coli_filtered_folddisco	12	--covered-node-ratio 0.75 --rmsd 2.0	Folddisco	0.021	2	result/M0545_e_coli_filtered_folddisco_Folddisco.tsv
query/M-CSA/single/M0545.txt	e_coli_filtered_folddisco	12	--covered-node-ratio 0.75 --skip-match	Folddisco_prefilter	0.014	1	result/M0545_e_coli_filtered_folddisco_Folddisco_prefilter.tsv
query/M-CSA/single/M0546.txt	e_coli_filtered_folddisco	12	--covered-node-ratio 0.75 --rmsd 2.0	Folddisco	0.065	2	result/M0546_e_coli_filtered_folddisco_Folddisco.tsv
query/M-CSA/single/M0546.txt	e_coli_filtered_folddisco	12	--covered-node-ratio 0.75 --skip-match	Folddisco_prefilter	0.016	23	result/M0546_e_coli_filtered_folddisco_Folddisco_prefilter.tsv
query/M-CSA/single/M0547.txt	e_coli_filtered_folddisco	12	--covered-node-ratio 0.75 --rmsd 2.0	Folddisco	0.024	0	result/M0547_e_coli_filtered_folddisco_Folddisco.tsv
query/M-CSA/single/M0547.txt	e_coli_filtered_folddisco	12	--covered-node-ratio 0.75 --skip-match	Folddisco_prefilter	0.012	2	result/M0547_e_coli_filtered_folddisco_Folddisco_prefilter.tsv
query/M-CSA/single/M0548.txt	e_coli_filtered_folddisco	12	--covered-node-ratio 0.75 --rmsd 2.0	Folddisco	0.052	37	result/M0548_e_coli_filtered_folddisco_Folddisco.tsv
query/M-CSA/single/M0548.txt	e_coli_filtered_folddisco	12	--covered-node-ratio 0.75 --skip-match	Folddisco_prefilter	0.013	19	result/M0548_e_coli_filtered_folddisco_Folddisco_prefilter.tsv
query/M-CSA/single/M0549.txt	e_coli_filtered_folddisco	12	--covered-node-ratio 0.75 --rmsd 2.0	Folddisco	0.041	1	result/M0549_e_coli_filtered_folddisco_Folddisco.tsv
query/M-CSA/single/M0549.txt	e_coli_filtered_folddisco	12	--covered-node-ratio 0.75 --skip-match	Folddisco_prefilter	0.014	2	result/M0549_e_coli_filtered_folddisco_Folddisco_prefilter.tsv
query/M-CSA/single/M0550.txt	e_coli_filtered_folddisco	12	--covered-node-ratio 0.75 --rmsd 2.0	Folddisco	0.046	7	result/M0550_e_coli_filtered_folddisco_Folddisco.tsv
query/M-CSA/single/M0550.txt	e_coli_filtered_folddisco	12	--covered-node-ratio 0.75 --skip-match	Folddisco_prefilter	0.013	4	result/M0550_e_coli_filtered_folddisco_Folddisco_prefilter.tsv
query/M-CSA/single/M0551.txt	e_coli_filtered_folddisco	12	--covered-node-ratio 0.75 --rmsd 2.0	Folddisco	0.031	2	result/M0551_e_coli_filtered_folddisco_Folddisco.tsv
query/M-CSA/single/M0551.txt	e_coli_filtered_folddisco	12	--covered-node-ratio 0.75 --skip-match	Folddisco_prefilter	0.02	1	result/M0551_e_coli_filtered_folddisco_Folddisco_prefilter.tsv
query/M-CSA/single/M0552.txt	e_coli_filtered_folddisco	12	--covered-node-ratio 0.75 --rmsd 2.0	Folddisco	0.067	5	result/M0552_e_coli_filtered_folddisco_Folddisco.tsv
query/M-CSA/single/M0552.txt	e_coli_filtered_folddisco	12	--covered-node-ratio 0.75 --skip-match	Folddisco_prefilter	0.016	13	result/M0552_e_coli_filtered_folddisco_Folddisco_prefilter.tsv
query/M-CSA/single/M0553.txt	e_coli_filtered_folddisco	12	--covered-node-ratio 0.75 --rmsd 2.0	Folddisco	0.041	22	result/M0553_e_coli_filtered_folddisco_Folddisco.tsv
query/M-CSA/single/M0553.txt	e_coli_filtered_folddisco	12	--covered-node-ratio 0.75 --skip-match	Folddisco_prefilter	0.017	21	result/M0553_e_coli_filtered_folddisco_Folddisco_prefilter.tsv
query/M-CSA/single/M0554.txt	e_coli_filtered_folddisco	12	--covered-node-ratio 0.75 --rmsd 2.0	Folddisco	0.036	10	result/M0554_e_coli_filtered_folddisco_Folddisco.tsv
query/M-CSA/single/M0554.txt	e_coli_filtered_folddisco	12	--covered-node-ratio 0.75 --skip-match	Folddisco_prefilter	0.011	5	result/M0554_e_coli_filtered_folddisco_Folddisco_prefilter.tsv
query/M-CSA/single/M0555.txt	e_coli_filtered_folddisco	12	--covered-node-ratio 0.75 --rmsd 2.0	Folddisco	0.021	0	result/M0555_e_coli_filtered_folddisco_Folddisco.tsv
query/M-CSA/single/M0555.txt	e_coli_filtered_folddisco	12	--covered-node-ratio 0.75 --skip-match	Folddisco_prefilter	0.02	0	result/M0555_e_coli_filtered_folddisco_Folddisco_prefilter.tsv
query/M-CSA/single/M0556.txt	e_coli_filtered_folddisco	12	--covered-node-ratio 0.75 --rmsd 2.0	Folddisco	0.015	0	result/M0556_e_coli_filtered_folddisco_Folddisco.tsv
query/M-CSA/single/M0556.txt	e_coli_filtered_folddisco	12	--covered-node-ratio 0.75 --skip-match	Folddisco_prefilter	0.012	0	result/M0556_e_coli_filtered_folddisco_Folddisco_prefilter.tsv
query/M-CSA/single/M0557.txt	e_coli_filtered_folddisco	12	--covered-node-ratio 0.75 --rmsd 2.0	Folddisco	0.027	1	result/M0557_e_coli_filtered_folddisco_Folddisco.tsv
query/M-CSA/single/M0557.txt	e_coli_filtered_folddisco	12	--covered-node-ratio 0.75 --skip-match	Folddisco_prefilter	0.021	1	result/M0557_e_coli_filtered_folddisco_Folddisco_prefilter.tsv
query/M-CSA/single/M0558.txt	e_coli_filtered_folddisco	12	--covered-node-ratio 0.75 --rmsd 2.0	Folddisco	0.022	10	result/M0558_e_coli_filtered_folddisco_Folddisco.tsv
query/M-CSA/single/M0558.txt	e_coli_filtered_folddisco	12	--covered-node-ratio 0.75 --skip-match	Folddisco_prefilter	0.011	7	result/M0558_e_coli_filtered_folddisco_Folddisco_prefilter.tsv
query/M-CSA/single/M0559.txt	e_coli_filtered_folddisco	12	--covered-node-ratio 0.75 --rmsd 2.0	Folddisco	0.026	4	result/M0559_e_coli_filtered_folddisco_Folddisco.tsv
query/M-CSA/single/M0559.txt	e_coli_filtered_folddisco	12	--covered-node-ratio 0.75 --skip-match	Folddisco_prefilter	0.014	2	result/M0559_e_coli_filtered_folddisco_Folddisco_prefilter.tsv
query/M-CSA/single/M0561.txt	e_coli_filtered_folddisco	12	--covered-node-ratio 0.75 --rmsd 2.0	Folddisco	0.049	45	result/M0561_e_coli_filtered_folddisco_Folddisco.tsv
query/M-CSA/single/M0561.txt	e_coli_filtered_folddisco	12	--covered-node-ratio 0.75 --skip-match	Folddisco_prefilter	0.012	44	result/M0561_e_coli_filtered_folddisco_Folddisco_prefilter.tsv
query/M-CSA/single/M0562.txt	e_coli_filtered_folddisco	12	--covered-node-ratio 0.75 --rmsd 2.0	Folddisco	0.019	0	result/M0562_e_coli_filtered_folddisco_Folddisco.tsv
query/M-CSA/single/M0562.txt	e_coli_filtered_folddisco	12	--covered-node-ratio 0.75 --skip-match	Folddisco_prefilter	0.013	0	result/M0562_e_coli_filtered_folddisco_Folddisco_prefilter.tsv
query/M-CSA/single/M0563.txt	e_coli_filtered_folddisco	12	--covered-node-ratio 0.75 --rmsd 2.0	Folddisco	0.022	0	result/M0563_e_coli_filtered_folddisco_Folddisco.tsv
query/M-CSA/single/M0563.txt	e_coli_filtered_folddisco	12	--covered-node-ratio 0.75 --skip-match	Folddisco_prefilter	0.016	0	result/M0563_e_coli_filtered_folddisco_Folddisco_prefilter.tsv
query/M-CSA/single/M0564.txt	e_coli_filtered_folddisco	12	--covered-node-ratio 0.75 --rmsd 2.0	Folddisco	0.018	0	result/M0564_e_coli_filtered_folddisco_Folddisco.tsv
query/M-CSA/single/M0564.txt	e_coli_filtered_folddisco	12	--covered-node-ratio 0.75 --skip-match	Folddisco_prefilter	0.016	0	result/M0564_e_coli_filtered_folddisco_Folddisco_prefilter.tsv
query/M-CSA/single/M0565.txt	e_coli_filtered_folddisco	12	--covered-node-ratio 0.75 --rmsd 2.0	Folddisco	0.017	0	result/M0565_e_coli_filtered_folddisco_Folddisco.tsv
query/M-CSA/single/M0565.txt	e_coli_filtered_folddisco	12	--covered-node-ratio 0.75 --skip-match	Folddisco_prefilter	0.012	0	result/M0565_e_coli_filtered_folddisco_Folddisco_prefilter.tsv
query/M-CSA/single/M0566.txt	e_coli_filtered_folddisco	12	--covered-node-ratio 0.75 --rmsd 2.0	Folddisco	0.064	42	result/M0566_e_coli_filtered_folddisco_Folddisco.tsv
query/M-CSA/single/M0566.txt	e_coli_filtered_folddisco	12	--covered-node-ratio 0.75 --skip-match	Folddisco_prefilter	0.015	37	result/M0566_e_coli_filtered_folddisco_Folddisco_prefilter.tsv
query/M-CSA/single/M0568.txt	e_coli_filtered_folddisco	12	--covered-node-ratio 0.75 --rmsd 2.0	Folddisco	0.028	9	result/M0568_e_coli_filtered_folddisco_Folddisco.tsv
query/M-CSA/single/M0568.txt	e_coli_filtered_folddisco	12	--covered-node-ratio 0.75 --skip-match	Folddisco_prefilter	0.012	7	result/M0568_e_coli_filtered_folddisco_Folddisco_prefilter.tsv
query/M-CSA/single/M0569.txt	e_coli_filtered_folddisco	12	--covered-node-ratio 0.75 --rmsd 2.0	Folddisco	0.019	0	result/M0569_e_coli_filtered_folddisco_Folddisco.tsv
query/M-CSA/single/M0569.txt	e_coli_filtered_folddisco	12	--covered-node-ratio 0.75 --skip-match	Folddisco_prefilter	0.013	0	result/M0569_e_coli_filtered_folddisco_Folddisco_prefilter.tsv
query/M-CSA/single/M0570.txt	e_coli_filtered_folddisco	12	--covered-node-ratio 0.75 --rmsd 2.0	Folddisco	0.046	55	result/M0570_e_coli_filtered_folddisco_Folddisco.tsv
query/M-CSA/single/M0570.txt	e_coli_filtered_folddisco	12	--covered-node-ratio 0.75 --skip-match	Folddisco_prefilter	0.013	27	result/M0570_e_coli_filtered_folddisco_Folddisco_prefilter.tsv
query/M-CSA/single/M0571.txt	e_coli_filtered_folddisco	12	--covered-node-ratio 0.75 --rmsd 2.0	Folddisco	0.031	3	result/M0571_e_coli_filtered_folddisco_Folddisco.tsv
query/M-CSA/single/M0571.txt	e_coli_filtered_folddisco	12	--covered-node-ratio 0.75 --skip-match	Folddisco_prefilter	0.012	3	result/M0571_e_coli_filtered_folddisco_Folddisco_prefilter.tsv
query/M-CSA/single/M0573.txt	e_coli_filtered_folddisco	12	--covered-node-ratio 0.75 --rmsd 2.0	Folddisco	0.028	1	result/M0573_e_coli_filtered_folddisco_Folddisco.tsv
query/M-CSA/single/M0573.txt	e_coli_filtered_folddisco	12	--covered-node-ratio 0.75 --skip-match	Folddisco_prefilter	0.02	1	result/M0573_e_coli_filtered_folddisco_Folddisco_prefilter.tsv
query/M-CSA/single/M0574.txt	e_coli_filtered_folddisco	12	--covered-node-ratio 0.75 --rmsd 2.0	Folddisco	0.017	2	result/M0574_e_coli_filtered_folddisco_Folddisco.tsv
query/M-CSA/single/M0574.txt	e_coli_filtered_folddisco	12	--covered-node-ratio 0.75 --skip-match	Folddisco_prefilter	0.011	2	result/M0574_e_coli_filtered_folddisco_Folddisco_prefilter.tsv
query/M-CSA/single/M0575.txt	e_coli_filtered_folddisco	12	--covered-node-ratio 0.75 --rmsd 2.0	Folddisco	0.016	0	result/M0575_e_coli_filtered_folddisco_Folddisco.tsv
query/M-CSA/single/M0575.txt	e_coli_filtered_folddisco	12	--covered-node-ratio 0.75 --skip-match	Folddisco_prefilter	0.011	0	result/M0575_e_coli_filtered_folddisco_Folddisco_prefilter.tsv
query/M-CSA/single/M0576.txt	e_coli_filtered_folddisco	12	--covered-node-ratio 0.75 --rmsd 2.0	Folddisco	0.036	25	result/M0576_e_coli_filtered_folddisco_Folddisco.tsv
query/M-CSA/single/M0576.txt	e_coli_filtered_folddisco	12	--covered-node-ratio 0.75 --skip-match	Folddisco_prefilter	0.012	14	result/M0576_e_coli_filtered_folddisco_Folddisco_prefilter.tsv
query/M-CSA/single/M0577.txt	e_coli_filtered_folddisco	12	--covered-node-ratio 0.75 --rmsd 2.0	Folddisco	0.024	5	result/M0577_e_coli_filtered_folddisco_Folddisco.tsv
query/M-CSA/single/M0577.txt	e_coli_filtered_folddisco	12	--covered-node-ratio 0.75 --skip-match	Folddisco_prefilter	0.011	5	result/M0577_e_coli_filtered_folddisco_Folddisco_prefilter.tsv
query/M-CSA/single/M0578.txt	e_coli_filtered_folddisco	12	--covered-node-ratio 0.75 --rmsd 2.0	Folddisco	0.034	6	result/M0578_e_coli_filtered_folddisco_Folddisco.tsv
query/M-CSA/single/M0578.txt	e_coli_filtered_folddisco	12	--covered-node-ratio 0.75 --skip-match	Folddisco_prefilter	0.013	7	result/M0578_e_coli_filtered_folddisco_Folddisco_prefilter.tsv
query/M-CSA/single/M0579.txt	e_coli_filtered_folddisco	12	--covered-node-ratio 0.75 --rmsd 2.0	Folddisco	0.047	27	result/M0579_e_coli_filtered_folddisco_Folddisco.tsv
query/M-CSA/single/M0579.txt	e_coli_filtered_folddisco	12	--covered-node-ratio 0.75 --skip-match	Folddisco_prefilter	0.015	27	result/M0579_e_coli_filtered_folddisco_Folddisco_prefilter.tsv
query/M-CSA/single/M0580.txt	e_coli_filtered_folddisco	12	--covered-node-ratio 0.75 --rmsd 2.0	Folddisco	0.023	4	result/M0580_e_coli_filtered_folddisco_Folddisco.tsv
query/M-CSA/single/M0580.txt	e_coli_filtered_folddisco	12	--covered-node-ratio 0.75 --skip-match	Folddisco_prefilter	0.011	4	result/M0580_e_coli_filtered_folddisco_Folddisco_prefilter.tsv
query/M-CSA/single/M0581.txt	e_coli_filtered_folddisco	12	--covered-node-ratio 0.75 --rmsd 2.0	Folddisco	0.052	14	result/M0581_e_coli_filtered_folddisco_Folddisco.tsv
query/M-CSA/single/M0581.txt	e_coli_filtered_folddisco	12	--covered-node-ratio 0.75 --skip-match	Folddisco_prefilter	0.015	11	result/M0581_e_coli_filtered_folddisco_Folddisco_prefilter.tsv
query/M-CSA/single/M0582.txt	e_coli_filtered_folddisco	12	--covered-node-ratio 0.75 --rmsd 2.0	Folddisco	0.033	12	result/M0582_e_coli_filtered_folddisco_Folddisco.tsv
query/M-CSA/single/M0582.txt	e_coli_filtered_folddisco	12	--covered-node-ratio 0.75 --skip-match	Folddisco_prefilter	0.013	12	result/M0582_e_coli_filtered_folddisco_Folddisco_prefilter.tsv
query/M-CSA/single/M0584.txt	e_coli_filtered_folddisco	12	--covered-node-ratio 0.75 --rmsd 2.0	Folddisco	0.055	62	result/M0584_e_coli_filtered_folddisco_Folddisco.tsv
query/M-CSA/single/M0584.txt	e_coli_filtered_folddisco	12	--covered-node-ratio 0.75 --skip-match	Folddisco_prefilter	0.014	30	result/M0584_e_coli_filtered_folddisco_Folddisco_prefilter.tsv
query/M-CSA/single/M0585.txt	e_coli_filtered_folddisco	12	--covered-node-ratio 0.75 --rmsd 2.0	Folddisco	0.05	49	result/M0585_e_coli_filtered_folddisco_Folddisco.tsv
query/M-CSA/single/M0585.txt	e_coli_filtered_folddisco	12	--covered-node-ratio 0.75 --skip-match	Folddisco_prefilter	0.012	25	result/M0585_e_coli_filtered_folddisco_Folddisco_prefilter.tsv
query/M-CSA/single/M0586.txt	e_coli_filtered_folddisco	12	--covered-node-ratio 0.75 --rmsd 2.0	Folddisco	0.048	29	result/M0586_e_coli_filtered_folddisco_Folddisco.tsv
query/M-CSA/single/M0586.txt	e_coli_filtered_folddisco	12	--covered-node-ratio 0.75 --skip-match	Folddisco_prefilter	0.011	29	result/M0586_e_coli_filtered_folddisco_Folddisco_prefilter.tsv
query/M-CSA/single/M0587.txt	e_coli_filtered_folddisco	12	--covered-node-ratio 0.75 --rmsd 2.0	Folddisco	0.046	43	result/M0587_e_coli_filtered_folddisco_Folddisco.tsv
query/M-CSA/single/M0587.txt	e_coli_filtered_folddisco	12	--covered-node-ratio 0.75 --skip-match	Folddisco_prefilter	0.012	41	result/M0587_e_coli_filtered_folddisco_Folddisco_prefilter.tsv
query/M-CSA/single/M0588.txt	e_coli_filtered_folddisco	12	--covered-node-ratio 0.75 --rmsd 2.0	Folddisco	0.036	0	result/M0588_e_coli_filtered_folddisco_Folddisco.tsv
query/M-CSA/single/M0588.txt	e_coli_filtered_folddisco	12	--covered-node-ratio 0.75 --skip-match	Folddisco_prefilter	0.012	3	result/M0588_e_coli_filtered_folddisco_Folddisco_prefilter.tsv
query/M-CSA/single/M0589.txt	e_coli_filtered_folddisco	12	--covered-node-ratio 0.75 --rmsd 2.0	Folddisco	0.043	4	result/M0589_e_coli_filtered_folddisco_Folddisco.tsv
query/M-CSA/single/M0589.txt	e_coli_filtered_folddisco	12	--covered-node-ratio 0.75 --skip-match	Folddisco_prefilter	0.015	2	result/M0589_e_coli_filtered_folddisco_Folddisco_prefilter.tsv
query/M-CSA/single/M0590.txt	e_coli_filtered_folddisco	12	--covered-node-ratio 0.75 --rmsd 2.0	Folddisco	0.027	7	result/M0590_e_coli_filtered_folddisco_Folddisco.tsv
query/M-CSA/single/M0590.txt	e_coli_filtered_folddisco	12	--covered-node-ratio 0.75 --skip-match	Folddisco_prefilter	0.014	5	result/M0590_e_coli_filtered_folddisco_Folddisco_prefilter.tsv
query/M-CSA/single/M0593.txt	e_coli_filtered_folddisco	12	--covered-node-ratio 0.75 --rmsd 2.0	Folddisco	0.037	10	result/M0593_e_coli_filtered_folddisco_Folddisco.tsv
query/M-CSA/single/M0593.txt	e_coli_filtered_folddisco	12	--covered-node-ratio 0.75 --skip-match	Folddisco_prefilter	0.011	10	result/M0593_e_coli_filtered_folddisco_Folddisco_prefilter.tsv
query/M-CSA/single/M0594.txt	e_coli_filtered_folddisco	12	--covered-node-ratio 0.75 --rmsd 2.0	Folddisco	0.016	0	result/M0594_e_coli_filtered_folddisco_Folddisco.tsv
query/M-CSA/single/M0594.txt	e_coli_filtered_folddisco	12	--covered-node-ratio 0.75 --skip-match	Folddisco_prefilter	0.014	0	result/M0594_e_coli_filtered_folddisco_Folddisco_prefilter.tsv
query/M-CSA/single/M0595.txt	e_coli_filtered_folddisco	12	--covered-node-ratio 0.75 --rmsd 2.0	Folddisco	0.052	12	result/M0595_e_coli_filtered_folddisco_Folddisco.tsv
query/M-CSA/single/M0595.txt	e_coli_filtered_folddisco	12	--covered-node-ratio 0.75 --skip-match	Folddisco_prefilter	0.011	12	result/M0595_e_coli_filtered_folddisco_Folddisco_prefilter.tsv
query/M-CSA/single/M0596.txt	e_coli_filtered_folddisco	12	--covered-node-ratio 0.75 --rmsd 2.0	Folddisco	0.037	22	result/M0596_e_coli_filtered_folddisco_Folddisco.tsv
query/M-CSA/single/M0596.txt	e_coli_filtered_folddisco	12	--covered-node-ratio 0.75 --skip-match	Folddisco_prefilter	0.011	22	result/M0596_e_coli_filtered_folddisco_Folddisco_prefilter.tsv
query/M-CSA/single/M0597.txt	e_coli_filtered_folddisco	12	--covered-node-ratio 0.75 --rmsd 2.0	Folddisco	0.017	2	result/M0597_e_coli_filtered_folddisco_Folddisco.tsv
query/M-CSA/single/M0597.txt	e_coli_filtered_folddisco	12	--covered-node-ratio 0.75 --skip-match	Folddisco_prefilter	0.01	1	result/M0597_e_coli_filtered_folddisco_Folddisco_prefilter.tsv
query/M-CSA/single/M0598.txt	e_coli_filtered_folddisco	12	--covered-node-ratio 0.75 --rmsd 2.0	Folddisco	0.022	0	result/M0598_e_coli_filtered_folddisco_Folddisco.tsv
query/M-CSA/single/M0598.txt	e_coli_filtered_folddisco	12	--covered-node-ratio 0.75 --skip-match	Folddisco_prefilter	0.016	0	result/M0598_e_coli_filtered_folddisco_Folddisco_prefilter.tsv
query/M-CSA/single/M0599.txt	e_coli_filtered_folddisco	12	--covered-node-ratio 0.75 --rmsd 2.0	Folddisco	0.05	50	result/M0599_e_coli_filtered_folddisco_Folddisco.tsv
query/M-CSA/single/M0599.txt	e_coli_filtered_folddisco	12	--covered-node-ratio 0.75 --skip-match	Folddisco_prefilter	0.013	21	result/M0599_e_coli_filtered_folddisco_Folddisco_prefilter.tsv
query/M-CSA/single/M0600.txt	e_coli_filtered_folddisco	12	--covered-node-ratio 0.75 --rmsd 2.0	Folddisco	0.05	53	result/M0600_e_coli_filtered_folddisco_Folddisco.tsv
query/M-CSA/single/M0600.txt	e_coli_filtered_folddisco	12	--covered-node-ratio 0.75 --skip-match	Folddisco_prefilter	0.016	52	result/M0600_e_coli_filtered_folddisco_Folddisco_prefilter.tsv
query/M-CSA/single/M0601.txt	e_coli_filtered_folddisco	12	--covered-node-ratio 0.75 --rmsd 2.0	Folddisco	0.028	8	result/M0601_e_coli_filtered_folddisco_Folddisco.tsv
query/M-CSA/single/M0601.txt	e_coli_filtered_folddisco	12	--covered-node-ratio 0.75 --skip-match	Folddisco_prefilter	0.014	8	result/M0601_e_coli_filtered_folddisco_Folddisco_prefilter.tsv
query/M-CSA/single/M0602.txt	e_coli_filtered_folddisco	12	--covered-node-ratio 0.75 --rmsd 2.0	Folddisco	0.057	71	result/M0602_e_coli_filtered_folddisco_Folddisco.tsv
query/M-CSA/single/M0602.txt	e_coli_filtered_folddisco	12	--covered-node-ratio 0.75 --skip-match	Folddisco_prefilter	0.014	35	result/M0602_e_coli_filtered_folddisco_Folddisco_prefilter.tsv
query/M-CSA/single/M0603.txt	e_coli_filtered_folddisco	12	--covered-node-ratio 0.75 --rmsd 2.0	Folddisco	0.14	569	result/M0603_e_coli_filtered_folddisco_Folddisco.tsv
query/M-CSA/single/M0603.txt	e_coli_filtered_folddisco	12	--covered-node-ratio 0.75 --skip-match	Folddisco_prefilter	0.017	506	result/M0603_e_coli_filtered_folddisco_Folddisco_prefilter.tsv
query/M-CSA/single/M0605.txt	e_coli_filtered_folddisco	12	--covered-node-ratio 0.75 --rmsd 2.0	Folddisco	0.024	2	result/M0605_e_coli_filtered_folddisco_Folddisco.tsv
query/M-CSA/single/M0605.txt	e_coli_filtered_folddisco	12	--covered-node-ratio 0.75 --skip-match	Folddisco_prefilter	0.015	1	result/M0605_e_coli_filtered_folddisco_Folddisco_prefilter.tsv
query/M-CSA/single/M0606.txt	e_coli_filtered_folddisco	12	--covered-node-ratio 0.75 --rmsd 2.0	Folddisco	0.04	18	result/M0606_e_coli_filtered_folddisco_Folddisco.tsv
query/M-CSA/single/M0606.txt	e_coli_filtered_folddisco	12	--covered-node-ratio 0.75 --skip-match	Folddisco_prefilter	0.021	18	result/M0606_e_coli_filtered_folddisco_Folddisco_prefilter.tsv
query/M-CSA/single/M0607.txt	e_coli_filtered_folddisco	12	--covered-node-ratio 0.75 --rmsd 2.0	Folddisco	0.047	88	result/M0607_e_coli_filtered_folddisco_Folddisco.tsv
query/M-CSA/single/M0607.txt	e_coli_filtered_folddisco	12	--covered-node-ratio 0.75 --skip-match	Folddisco_prefilter	0.013	87	result/M0607_e_coli_filtered_folddisco_Folddisco_prefilter.tsv
query/M-CSA/single/M0608.txt	e_coli_filtered_folddisco	12	--covered-node-ratio 0.75 --rmsd 2.0	Folddisco	0.015	0	result/M0608_e_coli_filtered_folddisco_Folddisco.tsv
query/M-CSA/single/M0608.txt	e_coli_filtered_folddisco	12	--covered-node-ratio 0.75 --skip-match	Folddisco_prefilter	0.009	0	result/M0608_e_coli_filtered_folddisco_Folddisco_prefilter.tsv
query/M-CSA/single/M0609.txt	e_coli_filtered_folddisco	12	--covered-node-ratio 0.75 --rmsd 2.0	Folddisco	0.025	7	result/M0609_e_coli_filtered_folddisco_Folddisco.tsv
query/M-CSA/single/M0609.txt	e_coli_filtered_folddisco	12	--covered-node-ratio 0.75 --skip-match	Folddisco_prefilter	0.012	6	result/M0609_e_coli_filtered_folddisco_Folddisco_prefilter.tsv
query/M-CSA/single/M0611.txt	e_coli_filtered_folddisco	12	--covered-node-ratio 0.75 --rmsd 2.0	Folddisco	0.04	32	result/M0611_e_coli_filtered_folddisco_Folddisco.tsv
query/M-CSA/single/M0611.txt	e_coli_filtered_folddisco	12	--covered-node-ratio 0.75 --skip-match	Folddisco_prefilter	0.014	12	result/M0611_e_coli_filtered_folddisco_Folddisco_prefilter.tsv
query/M-CSA/single/M0612.txt	e_coli_filtered_folddisco	12	--covered-node-ratio 0.75 --rmsd 2.0	Folddisco	0.015	0	result/M0612_e_coli_filtered_folddisco_Folddisco.tsv
query/M-CSA/single/M0612.txt	e_coli_filtered_folddisco	12	--covered-node-ratio 0.75 --skip-match	Folddisco_prefilter	0.013	0	result/M0612_e_coli_filtered_folddisco_Folddisco_prefilter.tsv
query/M-CSA/single/M0613.txt	e_coli_filtered_folddisco	12	--covered-node-ratio 0.75 --rmsd 2.0	Folddisco	0.016	1	result/M0613_e_coli_filtered_folddisco_Folddisco.tsv
query/M-CSA/single/M0613.txt	e_coli_filtered_folddisco	12	--covered-node-ratio 0.75 --skip-match	Folddisco_prefilter	0.013	1	result/M0613_e_coli_filtered_folddisco_Folddisco_prefilter.tsv
query/M-CSA/single/M0615.txt	e_coli_filtered_folddisco	12	--covered-node-ratio 0.75 --rmsd 2.0	Folddisco	0.039	17	result/M0615_e_coli_filtered_folddisco_Folddisco.tsv
query/M-CSA/single/M0615.txt	e_coli_filtered_folddisco	12	--covered-node-ratio 0.75 --skip-match	Folddisco_prefilter	0.02	17	result/M0615_e_coli_filtered_folddisco_Folddisco_prefilter.tsv
query/M-CSA/single/M0616.txt	e_coli_filtered_folddisco	12	--covered-node-ratio 0.75 --rmsd 2.0	Folddisco	0.025	12	result/M0616_e_coli_filtered_folddisco_Folddisco.tsv
query/M-CSA/single/M0616.txt	e_coli_filtered_folddisco	12	--covered-node-ratio 0.75 --skip-match	Folddisco_prefilter	0.013	8	result/M0616_e_coli_filtered_folddisco_Folddisco_prefilter.tsv
query/M-CSA/single/M0617.txt	e_coli_filtered_folddisco	12	--covered-node-ratio 0.75 --rmsd 2.0	Folddisco	0.019	1	result/M0617_e_coli_filtered_folddisco_Folddisco.tsv
query/M-CSA/single/M0617.txt	e_coli_filtered_folddisco	12	--covered-node-ratio 0.75 --skip-match	Folddisco_prefilter	0.01	1	result/M0617_e_coli_filtered_folddisco_Folddisco_prefilter.tsv
query/M-CSA/single/M0619.txt	e_coli_filtered_folddisco	12	--covered-node-ratio 0.75 --rmsd 2.0	Folddisco	0.017	0	result/M0619_e_coli_filtered_folddisco_Folddisco.tsv
query/M-CSA/single/M0619.txt	e_coli_filtered_folddisco	12	--covered-node-ratio 0.75 --skip-match	Folddisco_prefilter	0.014	0	result/M0619_e_coli_filtered_folddisco_Folddisco_prefilter.tsv
query/M-CSA/single/M0622.txt	e_coli_filtered_folddisco	12	--covered-node-ratio 0.75 --rmsd 2.0	Folddisco	0.041	16	result/M0622_e_coli_filtered_folddisco_Folddisco.tsv
query/M-CSA/single/M0622.txt	e_coli_filtered_folddisco	12	--covered-node-ratio 0.75 --skip-match	Folddisco_prefilter	0.013	16	result/M0622_e_coli_filtered_folddisco_Folddisco_prefilter.tsv
query/M-CSA/single/M0623.txt	e_coli_filtered_folddisco	12	--covered-node-ratio 0.75 --rmsd 2.0	Folddisco	0.046	27	result/M0623_e_coli_filtered_folddisco_Folddisco.tsv
query/M-CSA/single/M0623.txt	e_coli_filtered_folddisco	12	--covered-node-ratio 0.75 --skip-match	Folddisco_prefilter	0.013	14	result/M0623_e_coli_filtered_folddisco_Folddisco_prefilter.tsv
query/M-CSA/single/M0624.txt	e_coli_filtered_folddisco	12	--covered-node-ratio 0.75 --rmsd 2.0	Folddisco	0.02	2	result/M0624_e_coli_filtered_folddisco_Folddisco.tsv
query/M-CSA/single/M0624.txt	e_coli_filtered_folddisco	12	--covered-node-ratio 0.75 --skip-match	Folddisco_prefilter	0.011	1	result/M0624_e_coli_filtered_folddisco_Folddisco_prefilter.tsv
query/M-CSA/single/M0625.txt	e_coli_filtered_folddisco	12	--covered-node-ratio 0.75 --rmsd 2.0	Folddisco	0.015	0	result/M0625_e_coli_filtered_folddisco_Folddisco.tsv
query/M-CSA/single/M0625.txt	e_coli_filtered_folddisco	12	--covered-node-ratio 0.75 --skip-match	Folddisco_prefilter	0.011	0	result/M0625_e_coli_filtered_folddisco_Folddisco_prefilter.tsv
query/M-CSA/single/M0626.txt	e_coli_filtered_folddisco	12	--covered-node-ratio 0.75 --rmsd 2.0	Folddisco	0.017	0	result/M0626_e_coli_filtered_folddisco_Folddisco.tsv
query/M-CSA/single/M0626.txt	e_coli_filtered_folddisco	12	--covered-node-ratio 0.75 --skip-match	Folddisco_prefilter	0.014	0	result/M0626_e_coli_filtered_folddisco_Folddisco_prefilter.tsv
query/M-CSA/single/M0627.txt	e_coli_filtered_folddisco	12	--covered-node-ratio 0.75 --rmsd 2.0	Folddisco	0.014	0	result/M0627_e_coli_filtered_folddisco_Folddisco.tsv
query/M-CSA/single/M0627.txt	e_coli_filtered_folddisco	12	--covered-node-ratio 0.75 --skip-match	Folddisco_prefilter	0.01	0	result/M0627_e_coli_filtered_folddisco_Folddisco_prefilter.tsv
query/M-CSA/single/M0629.txt	e_coli_filtered_folddisco	12	--covered-node-ratio 0.75 --rmsd 2.0	Folddisco	0.039	14	result/M0629_e_coli_filtered_folddisco_Folddisco.tsv
query/M-CSA/single/M0629.txt	e_coli_filtered_folddisco	12	--covered-node-ratio 0.75 --skip-match	Folddisco_prefilter	0.016	14	result/M0629_e_coli_filtered_folddisco_Folddisco_prefilter.tsv
query/M-CSA/single/M0631.txt	e_coli_filtered_folddisco	12	--covered-node-ratio 0.75 --rmsd 2.0	Folddisco	0.041	9	result/M0631_e_coli_filtered_folddisco_Folddisco.tsv
query/M-CSA/single/M0631.txt	e_coli_filtered_folddisco	12	--covered-node-ratio 0.75 --skip-match	Folddisco_prefilter	0.012	8	result/M0631_e_coli_filtered_folddisco_Folddisco_prefilter.tsv
query/M-CSA/single/M0633.txt	e_coli_filtered_folddisco	12	--covered-node-ratio 0.75 --rmsd 2.0	Folddisco	0.018	0	result/M0633_e_coli_filtered_folddisco_Folddisco.tsv
query/M-CSA/single/M0633.txt	e_coli_filtered_folddisco	12	--covered-node-ratio 0.75 --skip-match	Folddisco_prefilter	0.015	0	result/M0633_e_coli_filtered_folddisco_Folddisco_prefilter.tsv
query/M-CSA/single/M0634.txt	e_coli_filtered_folddisco	12	--covered-node-ratio 0.75 --rmsd 2.0	Folddisco	0.028	1	result/M0634_e_coli_filtered_folddisco_Folddisco.tsv
query/M-CSA/single/M0634.txt	e_coli_filtered_folddisco	12	--covered-node-ratio 0.75 --skip-match	Folddisco_prefilter	0.015	2	result/M0634_e_coli_filtered_folddisco_Folddisco_prefilter.tsv
query/M-CSA/single/M0635.txt	e_coli_filtered_folddisco	12	--covered-node-ratio 0.75 --rmsd 2.0	Folddisco	0.02	1	result/M0635_e_coli_filtered_folddisco_Folddisco.tsv
query/M-CSA/single/M0635.txt	e_coli_filtered_folddisco	12	--covered-node-ratio 0.75 --skip-match	Folddisco_prefilter	0.012	2	result/M0635_e_coli_filtered_folddisco_Folddisco_prefilter.tsv
query/M-CSA/single/M0636.txt	e_coli_filtered_folddisco	12	--covered-node-ratio 0.75 --rmsd 2.0	Folddisco	0.016	0	result/M0636_e_coli_filtered_folddisco_Folddisco.tsv
query/M-CSA/single/M0636.txt	e_coli_filtered_folddisco	12	--covered-node-ratio 0.75 --skip-match	Folddisco_prefilter	0.012	0	result/M0636_e_coli_filtered_folddisco_Folddisco_prefilter.tsv
query/M-CSA/single/M0637.txt	e_coli_filtered_folddisco	12	--covered-node-ratio 0.75 --rmsd 2.0	Folddisco	0.039	19	result/M0637_e_coli_filtered_folddisco_Folddisco.tsv
query/M-CSA/single/M0637.txt	e_coli_filtered_folddisco	12	--covered-node-ratio 0.75 --skip-match	Folddisco_prefilter	0.014	19	result/M0637_e_coli_filtered_folddisco_Folddisco_prefilter.tsv
query/M-CSA/single/M0638.txt	e_coli_filtered_folddisco	12	--covered-node-ratio 0.75 --rmsd 2.0	Folddisco	0.018	0	result/M0638_e_coli_filtered_folddisco_Folddisco.tsv
query/M-CSA/single/M0638.txt	e_coli_filtered_folddisco	12	--covered-node-ratio 0.75 --skip-match	Folddisco_prefilter	0.014	0	result/M0638_e_coli_filtered_folddisco_Folddisco_prefilter.tsv
query/M-CSA/single/M0639.txt	e_coli_filtered_folddisco	12	--covered-node-ratio 0.75 --rmsd 2.0	Folddisco	0.016	0	result/M0639_e_coli_filtered_folddisco_Folddisco.tsv
query/M-CSA/single/M0639.txt	e_coli_filtered_folddisco	12	--covered-node-ratio 0.75 --skip-match	Folddisco_prefilter	0.012	0	result/M0639_e_coli_filtered_folddisco_Folddisco_prefilter.tsv
query/M-CSA/single/M0640.txt	e_coli_filtered_folddisco	12	--covered-node-ratio 0.75 --rmsd 2.0	Folddisco	0.022	7	result/M0640_e_coli_filtered_folddisco_Folddisco.tsv
query/M-CSA/single/M0640.txt	e_coli_filtered_folddisco	12	--covered-node-ratio 0.75 --skip-match	Folddisco_prefilter	0.012	7	result/M0640_e_coli_filtered_folddisco_Folddisco_prefilter.tsv
query/M-CSA/single/M0641.txt	e_coli_filtered_folddisco	12	--covered-node-ratio 0.75 --rmsd 2.0	Folddisco	0.048	14	result/M0641_e_coli_filtered_folddisco_Folddisco.tsv
query/M-CSA/single/M0641.txt	e_coli_filtered_folddisco	12	--covered-node-ratio 0.75 --skip-match	Folddisco_prefilter	0.018	14	result/M0641_e_coli_filtered_folddisco_Folddisco_prefilter.tsv
query/M-CSA/single/M0642.txt	e_coli_filtered_folddisco	12	--covered-node-ratio 0.75 --rmsd 2.0	Folddisco	0.016	0	result/M0642_e_coli_filtered_folddisco_Folddisco.tsv
query/M-CSA/single/M0642.txt	e_coli_filtered_folddisco	12	--covered-node-ratio 0.75 --skip-match	Folddisco_prefilter	0.011	0	result/M0642_e_coli_filtered_folddisco_Folddisco_prefilter.tsv
query/M-CSA/single/M0643.txt	e_coli_filtered_folddisco	12	--covered-node-ratio 0.75 --rmsd 2.0	Folddisco	0.05	10	result/M0643_e_coli_filtered_folddisco_Folddisco.tsv
query/M-CSA/single/M0643.txt	e_coli_filtered_folddisco	12	--covered-node-ratio 0.75 --skip-match	Folddisco_prefilter	0.016	7	result/M0643_e_coli_filtered_folddisco_Folddisco_prefilter.tsv
query/M-CSA/single/M0644.txt	e_coli_filtered_folddisco	12	--covered-node-ratio 0.75 --rmsd 2.0	Folddisco	0.061	44	result/M0644_e_coli_filtered_folddisco_Folddisco.tsv
query/M-CSA/single/M0644.txt	e_coli_filtered_folddisco	12	--covered-node-ratio 0.75 --skip-match	Folddisco_prefilter	0.014	24	result/M0644_e_coli_filtered_folddisco_Folddisco_prefilter.tsv
query/M-CSA/single/M0645.txt	e_coli_filtered_folddisco	12	--covered-node-ratio 0.75 --rmsd 2.0	Folddisco	0.035	0	result/M0645_e_coli_filtered_folddisco_Folddisco.tsv
query/M-CSA/single/M0645.txt	e_coli_filtered_folddisco	12	--covered-node-ratio 0.75 --skip-match	Folddisco_prefilter	0.037	0	result/M0645_e_coli_filtered_folddisco_Folddisco_prefilter.tsv
query/M-CSA/single/M0646.txt	e_coli_filtered_folddisco	12	--covered-node-ratio 0.75 --rmsd 2.0	Folddisco	0.024	0	result/M0646_e_coli_filtered_folddisco_Folddisco.tsv
query/M-CSA/single/M0646.txt	e_coli_filtered_folddisco	12	--covered-node-ratio 0.75 --skip-match	Folddisco_prefilter	0.02	0	result/M0646_e_coli_filtered_folddisco_Folddisco_prefilter.tsv
query/M-CSA/single/M0647.txt	e_coli_filtered_folddisco	12	--covered-node-ratio 0.75 --rmsd 2.0	Folddisco	0.276	1822	result/M0647_e_coli_filtered_folddisco_Folddisco.tsv
query/M-CSA/single/M0647.txt	e_coli_filtered_folddisco	12	--covered-node-ratio 0.75 --skip-match	Folddisco_prefilter	0.018	1293	result/M0647_e_coli_filtered_folddisco_Folddisco_prefilter.tsv
query/M-CSA/single/M0648.txt	e_coli_filtered_folddisco	12	--covered-node-ratio 0.75 --rmsd 2.0	Folddisco	0.018	0	result/M0648_e_coli_filtered_folddisco_Folddisco.tsv
query/M-CSA/single/M0648.txt	e_coli_filtered_folddisco	12	--covered-node-ratio 0.75 --skip-match	Folddisco_prefilter	0.011	0	result/M0648_e_coli_filtered_folddisco_Folddisco_prefilter.tsv
query/M-CSA/single/M0650.txt	e_coli_filtered_folddisco	12	--covered-node-ratio 0.75 --rmsd 2.0	Folddisco	0.034	11	result/M0650_e_coli_filtered_folddisco_Folddisco.tsv
query/M-CSA/single/M0650.txt	e_coli_filtered_folddisco	12	--covered-node-ratio 0.75 --skip-match	Folddisco_prefilter	0.014	6	result/M0650_e_coli_filtered_folddisco_Folddisco_prefilter.tsv
query/M-CSA/single/M0651.txt	e_coli_filtered_folddisco	12	--covered-node-ratio 0.75 --rmsd 2.0	Folddisco	0.031	14	result/M0651_e_coli_filtered_folddisco_Folddisco.tsv
query/M-CSA/single/M0651.txt	e_coli_filtered_folddisco	12	--covered-node-ratio 0.75 --skip-match	Folddisco_prefilter	0.013	8	result/M0651_e_coli_filtered_folddisco_Folddisco_prefilter.tsv
query/M-CSA/single/M0652.txt	e_coli_filtered_folddisco	12	--covered-node-ratio 0.75 --rmsd 2.0	Folddisco	0.046	17	result/M0652_e_coli_filtered_folddisco_Folddisco.tsv
query/M-CSA/single/M0652.txt	e_coli_filtered_folddisco	12	--covered-node-ratio 0.75 --skip-match	Folddisco_prefilter	0.023	17	result/M0652_e_coli_filtered_folddisco_Folddisco_prefilter.tsv
query/M-CSA/single/M0653.txt	e_coli_filtered_folddisco	12	--covered-node-ratio 0.75 --rmsd 2.0	Folddisco	0.073	38	result/M0653_e_coli_filtered_folddisco_Folddisco.tsv
query/M-CSA/single/M0653.txt	e_coli_filtered_folddisco	12	--covered-node-ratio 0.75 --skip-match	Folddisco_prefilter	0.018	16	result/M0653_e_coli_filtered_folddisco_Folddisco_prefilter.tsv
query/M-CSA/single/M0654.txt	e_coli_filtered_folddisco	12	--covered-node-ratio 0.75 --rmsd 2.0	Folddisco	0.025	4	result/M0654_e_coli_filtered_folddisco_Folddisco.tsv
query/M-CSA/single/M0654.txt	e_coli_filtered_folddisco	12	--covered-node-ratio 0.75 --skip-match	Folddisco_prefilter	0.014	4	result/M0654_e_coli_filtered_folddisco_Folddisco_prefilter.tsv
query/M-CSA/single/M0655.txt	e_coli_filtered_folddisco	12	--covered-node-ratio 0.75 --rmsd 2.0	Folddisco	0.018	1	result/M0655_e_coli_filtered_folddisco_Folddisco.tsv
query/M-CSA/single/M0655.txt	e_coli_filtered_folddisco	12	--covered-node-ratio 0.75 --skip-match	Folddisco_prefilter	0.011	1	result/M0655_e_coli_filtered_folddisco_Folddisco_prefilter.tsv
query/M-CSA/single/M0658.txt	e_coli_filtered_folddisco	12	--covered-node-ratio 0.75 --rmsd 2.0	Folddisco	0.028	7	result/M0658_e_coli_filtered_folddisco_Folddisco.tsv
query/M-CSA/single/M0658.txt	e_coli_filtered_folddisco	12	--covered-node-ratio 0.75 --skip-match	Folddisco_prefilter	0.012	5	result/M0658_e_coli_filtered_folddisco_Folddisco_prefilter.tsv
query/M-CSA/single/M0659.txt	e_coli_filtered_folddisco	12	--covered-node-ratio 0.75 --rmsd 2.0	Folddisco	0.02	0	result/M0659_e_coli_filtered_folddisco_Folddisco.tsv
query/M-CSA/single/M0659.txt	e_coli_filtered_folddisco	12	--covered-node-ratio 0.75 --skip-match	Folddisco_prefilter	0.016	0	result/M0659_e_coli_filtered_folddisco_Folddisco_prefilter.tsv
query/M-CSA/single/M0660.txt	e_coli_filtered_folddisco	12	--covered-node-ratio 0.75 --rmsd 2.0	Folddisco	0.128	402	result/M0660_e_coli_filtered_folddisco_Folddisco.tsv
query/M-CSA/single/M0660.txt	e_coli_filtered_folddisco	12	--covered-node-ratio 0.75 --skip-match	Folddisco_prefilter	0.016	370	result/M0660_e_coli_filtered_folddisco_Folddisco_prefilter.tsv
query/M-CSA/single/M0661.txt	e_coli_filtered_folddisco	12	--covered-node-ratio 0.75 --rmsd 2.0	Folddisco	0.028	2	result/M0661_e_coli_filtered_folddisco_Folddisco.tsv
query/M-CSA/single/M0661.txt	e_coli_filtered_folddisco	12	--covered-node-ratio 0.75 --skip-match	Folddisco_prefilter	0.017	2	result/M0661_e_coli_filtered_folddisco_Folddisco_prefilter.tsv
query/M-CSA/single/M0662.txt	e_coli_filtered_folddisco	12	--covered-node-ratio 0.75 --rmsd 2.0	Folddisco	0.051	32	result/M0662_e_coli_filtered_folddisco_Folddisco.tsv
query/M-CSA/single/M0662.txt	e_coli_filtered_folddisco	12	--covered-node-ratio 0.75 --skip-match	Folddisco_prefilter	0.014	32	result/M0662_e_coli_filtered_folddisco_Folddisco_prefilter.tsv
query/M-CSA/single/M0663.txt	e_coli_filtered_folddisco	12	--covered-node-ratio 0.75 --rmsd 2.0	Folddisco	0.38	3452	result/M0663_e_coli_filtered_folddisco_Folddisco.tsv
query/M-CSA/single/M0663.txt	e_coli_filtered_folddisco	12	--covered-node-ratio 0.75 --skip-match	Folddisco_prefilter	0.026	1141	result/M0663_e_coli_filtered_folddisco_Folddisco_prefilter.tsv
query/M-CSA/single/M0664.txt	e_coli_filtered_folddisco	12	--covered-node-ratio 0.75 --rmsd 2.0	Folddisco	0.027	9	result/M0664_e_coli_filtered_folddisco_Folddisco.tsv
query/M-CSA/single/M0664.txt	e_coli_filtered_folddisco	12	--covered-node-ratio 0.75 --skip-match	Folddisco_prefilter	0.012	9	result/M0664_e_coli_filtered_folddisco_Folddisco_prefilter.tsv
query/M-CSA/single/M0665.txt	e_coli_filtered_folddisco	12	--covered-node-ratio 0.75 --rmsd 2.0	Folddisco	0.135	189	result/M0665_e_coli_filtered_folddisco_Folddisco.tsv
query/M-CSA/single/M0665.txt	e_coli_filtered_folddisco	12	--covered-node-ratio 0.75 --skip-match	Folddisco_prefilter	0.018	114	result/M0665_e_coli_filtered_folddisco_Folddisco_prefilter.tsv
query/M-CSA/single/M0666.txt	e_coli_filtered_folddisco	12	--covered-node-ratio 0.75 --rmsd 2.0	Folddisco	0.045	8	result/M0666_e_coli_filtered_folddisco_Folddisco.tsv
query/M-CSA/single/M0666.txt	e_coli_filtered_folddisco	12	--covered-node-ratio 0.75 --skip-match	Folddisco_prefilter	0.024	5	result/M0666_e_coli_filtered_folddisco_Folddisco_prefilter.tsv
query/M-CSA/single/M0667.txt	e_coli_filtered_folddisco	12	--covered-node-ratio 0.75 --rmsd 2.0	Folddisco	0.049	23	result/M0667_e_coli_filtered_folddisco_Folddisco.tsv
query/M-CSA/single/M0667.txt	e_coli_filtered_folddisco	12	--covered-node-ratio 0.75 --skip-match	Folddisco_prefilter	0.017	23	result/M0667_e_coli_filtered_folddisco_Folddisco_prefilter.tsv
query/M-CSA/single/M0669.txt	e_coli_filtered_folddisco	12	--covered-node-ratio 0.75 --rmsd 2.0	Folddisco	0.022	2	result/M0669_e_coli_filtered_folddisco_Folddisco.tsv
query/M-CSA/single/M0669.txt	e_coli_filtered_folddisco	12	--covered-node-ratio 0.75 --skip-match	Folddisco_prefilter	0.014	1	result/M0669_e_coli_filtered_folddisco_Folddisco_prefilter.tsv
query/M-CSA/single/M0670.txt	e_coli_filtered_folddisco	12	--covered-node-ratio 0.75 --rmsd 2.0	Folddisco	0.053	56	result/M0670_e_coli_filtered_folddisco_Folddisco.tsv
query/M-CSA/single/M0670.txt	e_coli_filtered_folddisco	12	--covered-node-ratio 0.75 --skip-match	Folddisco_prefilter	0.013	55	result/M0670_e_coli_filtered_folddisco_Folddisco_prefilter.tsv
query/M-CSA/single/M0671.txt	e_coli_filtered_folddisco	12	--covered-node-ratio 0.75 --rmsd 2.0	Folddisco	0.022	1	result/M0671_e_coli_filtered_folddisco_Folddisco.tsv
query/M-CSA/single/M0671.txt	e_coli_filtered_folddisco	12	--covered-node-ratio 0.75 --skip-match	Folddisco_prefilter	0.017	1	result/M0671_e_coli_filtered_folddisco_Folddisco_prefilter.tsv
query/M-CSA/single/M0673.txt	e_coli_filtered_folddisco	12	--covered-node-ratio 0.75 --rmsd 2.0	Folddisco	0.022	0	result/M0673_e_coli_filtered_folddisco_Folddisco.tsv
query/M-CSA/single/M0673.txt	e_coli_filtered_folddisco	12	--covered-node-ratio 0.75 --skip-match	Folddisco_prefilter	0.017	0	result/M0673_e_coli_filtered_folddisco_Folddisco_prefilter.tsv
query/M-CSA/single/M0674.txt	e_coli_filtered_folddisco	12	--covered-node-ratio 0.75 --rmsd 2.0	Folddisco	0.024	2	result/M0674_e_coli_filtered_folddisco_Folddisco.tsv
query/M-CSA/single/M0674.txt	e_coli_filtered_folddisco	12	--covered-node-ratio 0.75 --skip-match	Folddisco_prefilter	0.014	1	result/M0674_e_coli_filtered_folddisco_Folddisco_prefilter.tsv
query/M-CSA/single/M0675.txt	e_coli_filtered_folddisco	12	--covered-node-ratio 0.75 --rmsd 2.0	Folddisco	0.02	0	result/M0675_e_coli_filtered_folddisco_Folddisco.tsv
query/M-CSA/single/M0675.txt	e_coli_filtered_folddisco	12	--covered-node-ratio 0.75 --skip-match	Folddisco_prefilter	0.016	0	result/M0675_e_coli_filtered_folddisco_Folddisco_prefilter.tsv
query/M-CSA/single/M0676.txt	e_coli_filtered_folddisco	12	--covered-node-ratio 0.75 --rmsd 2.0	Folddisco	0.063	48	result/M0676_e_coli_filtered_folddisco_Folddisco.tsv
query/M-CSA/single/M0676.txt	e_coli_filtered_folddisco	12	--covered-node-ratio 0.75 --skip-match	Folddisco_prefilter	0.025	20	result/M0676_e_coli_filtered_folddisco_Folddisco_prefilter.tsv
query/M-CSA/single/M0678.txt	e_coli_filtered_folddisco	12	--covered-node-ratio 0.75 --rmsd 2.0	Folddisco	0.034	2	result/M0678_e_coli_filtered_folddisco_Folddisco.tsv
query/M-CSA/single/M0678.txt	e_coli_filtered_folddisco	12	--covered-node-ratio 0.75 --skip-match	Folddisco_prefilter	0.026	1	result/M0678_e_coli_filtered_folddisco_Folddisco_prefilter.tsv
query/M-CSA/single/M0679.txt	e_coli_filtered_folddisco	12	--covered-node-ratio 0.75 --rmsd 2.0	Folddisco	0.022	2	result/M0679_e_coli_filtered_folddisco_Folddisco.tsv
query/M-CSA/single/M0679.txt	e_coli_filtered_folddisco	12	--covered-node-ratio 0.75 --skip-match	Folddisco_prefilter	0.013	1	result/M0679_e_coli_filtered_folddisco_Folddisco_prefilter.tsv
query/M-CSA/single/M0680.txt	e_coli_filtered_folddisco	12	--covered-node-ratio 0.75 --rmsd 2.0	Folddisco	0.018	1	result/M0680_e_coli_filtered_folddisco_Folddisco.tsv
query/M-CSA/single/M0680.txt	e_coli_filtered_folddisco	12	--covered-node-ratio 0.75 --skip-match	Folddisco_prefilter	0.014	1	result/M0680_e_coli_filtered_folddisco_Folddisco_prefilter.tsv
query/M-CSA/single/M0681.txt	e_coli_filtered_folddisco	12	--covered-node-ratio 0.75 --rmsd 2.0	Folddisco	0.044	15	result/M0681_e_coli_filtered_folddisco_Folddisco.tsv
query/M-CSA/single/M0681.txt	e_coli_filtered_folddisco	12	--covered-node-ratio 0.75 --skip-match	Folddisco_prefilter	0.012	7	result/M0681_e_coli_filtered_folddisco_Folddisco_prefilter.tsv
query/M-CSA/single/M0682.txt	e_coli_filtered_folddisco	12	--covered-node-ratio 0.75 --rmsd 2.0	Folddisco	0.016	0	result/M0682_e_coli_filtered_folddisco_Folddisco.tsv
query/M-CSA/single/M0682.txt	e_coli_filtered_folddisco	12	--covered-node-ratio 0.75 --skip-match	Folddisco_prefilter	0.011	0	result/M0682_e_coli_filtered_folddisco_Folddisco_prefilter.tsv
query/M-CSA/single/M0683.txt	e_coli_filtered_folddisco	12	--covered-node-ratio 0.75 --rmsd 2.0	Folddisco	0.017	0	result/M0683_e_coli_filtered_folddisco_Folddisco.tsv
query/M-CSA/single/M0683.txt	e_coli_filtered_folddisco	12	--covered-node-ratio 0.75 --skip-match	Folddisco_prefilter	0.011	0	result/M0683_e_coli_filtered_folddisco_Folddisco_prefilter.tsv
query/M-CSA/single/M0684.txt	e_coli_filtered_folddisco	12	--covered-node-ratio 0.75 --rmsd 2.0	Folddisco	0.016	0	result/M0684_e_coli_filtered_folddisco_Folddisco.tsv
query/M-CSA/single/M0684.txt	e_coli_filtered_folddisco	12	--covered-node-ratio 0.75 --skip-match	Folddisco_prefilter	0.012	0	result/M0684_e_coli_filtered_folddisco_Folddisco_prefilter.tsv
query/M-CSA/single/M0686.txt	e_coli_filtered_folddisco	12	--covered-node-ratio 0.75 --rmsd 2.0	Folddisco	0.027	10	result/M0686_e_coli_filtered_folddisco_Folddisco.tsv
query/M-CSA/single/M0686.txt	e_coli_filtered_folddisco	12	--covered-node-ratio 0.75 --skip-match	Folddisco_prefilter	0.011	10	result/M0686_e_coli_filtered_folddisco_Folddisco_prefilter.tsv
query/M-CSA/single/M0687.txt	e_coli_filtered_folddisco	12	--covered-node-ratio 0.75 --rmsd 2.0	Folddisco	0.017	0	result/M0687_e_coli_filtered_folddisco_Folddisco.tsv
query/M-CSA/single/M0687.txt	e_coli_filtered_folddisco	12	--covered-node-ratio 0.75 --skip-match	Folddisco_prefilter	0.016	0	result/M0687_e_coli_filtered_folddisco_Folddisco_prefilter.tsv
query/M-CSA/single/M0688.txt	e_coli_filtered_folddisco	12	--covered-node-ratio 0.75 --rmsd 2.0	Folddisco	0.02	2	result/M0688_e_coli_filtered_folddisco_Folddisco.tsv
query/M-CSA/single/M0688.txt	e_coli_filtered_folddisco	12	--covered-node-ratio 0.75 --skip-match	Folddisco_prefilter	0.012	2	result/M0688_e_coli_filtered_folddisco_Folddisco_prefilter.tsv
query/M-CSA/single/M0689.txt	e_coli_filtered_folddisco	12	--covered-node-ratio 0.75 --rmsd 2.0	Folddisco	0.054	14	result/M0689_e_coli_filtered_folddisco_Folddisco.tsv
query/M-CSA/single/M0689.txt	e_coli_filtered_folddisco	12	--covered-node-ratio 0.75 --skip-match	Folddisco_prefilter	0.014	12	result/M0689_e_coli_filtered_folddisco_Folddisco_prefilter.tsv
query/M-CSA/single/M0690.txt	e_coli_filtered_folddisco	12	--covered-node-ratio 0.75 --rmsd 2.0	Folddisco	0.015	0	result/M0690_e_coli_filtered_folddisco_Folddisco.tsv
query/M-CSA/single/M0690.txt	e_coli_filtered_folddisco	12	--covered-node-ratio 0.75 --skip-match	Folddisco_prefilter	0.013	0	result/M0690_e_coli_filtered_folddisco_Folddisco_prefilter.tsv
query/M-CSA/single/M0691.txt	e_coli_filtered_folddisco	12	--covered-node-ratio 0.75 --rmsd 2.0	Folddisco	0.034	21	result/M0691_e_coli_filtered_folddisco_Folddisco.tsv
query/M-CSA/single/M0691.txt	e_coli_filtered_folddisco	12	--covered-node-ratio 0.75 --skip-match	Folddisco_prefilter	0.012	21	result/M0691_e_coli_filtered_folddisco_Folddisco_prefilter.tsv
query/M-CSA/single/M0693.txt	e_coli_filtered_folddisco	12	--covered-node-ratio 0.75 --rmsd 2.0	Folddisco	0.019	2	result/M0693_e_coli_filtered_folddisco_Folddisco.tsv
query/M-CSA/single/M0693.txt	e_coli_filtered_folddisco	12	--covered-node-ratio 0.75 --skip-match	Folddisco_prefilter	0.011	1	result/M0693_e_coli_filtered_folddisco_Folddisco_prefilter.tsv
query/M-CSA/single/M0694.txt	e_coli_filtered_folddisco	12	--covered-node-ratio 0.75 --rmsd 2.0	Folddisco	0.04	14	result/M0694_e_coli_filtered_folddisco_Folddisco.tsv
query/M-CSA/single/M0694.txt	e_coli_filtered_folddisco	12	--covered-node-ratio 0.75 --skip-match	Folddisco_prefilter	0.011	11	result/M0694_e_coli_filtered_folddisco_Folddisco_prefilter.tsv
query/M-CSA/single/M0697.txt	e_coli_filtered_folddisco	12	--covered-node-ratio 0.75 --rmsd 2.0	Folddisco	0.02	1	result/M0697_e_coli_filtered_folddisco_Folddisco.tsv
query/M-CSA/single/M0697.txt	e_coli_filtered_folddisco	12	--covered-node-ratio 0.75 --skip-match	Folddisco_prefilter	0.012	1	result/M0697_e_coli_filtered_folddisco_Folddisco_prefilter.tsv
query/M-CSA/single/M0698.txt	e_coli_filtered_folddisco	12	--covered-node-ratio 0.75 --rmsd 2.0	Folddisco	0.048	25	result/M0698_e_coli_filtered_folddisco_Folddisco.tsv
query/M-CSA/single/M0698.txt	e_coli_filtered_folddisco	12	--covered-node-ratio 0.75 --skip-match	Folddisco_prefilter	0.029	25	result/M0698_e_coli_filtered_folddisco_Folddisco_prefilter.tsv
query/M-CSA/single/M0699.txt	e_coli_filtered_folddisco	12	--covered-node-ratio 0.75 --rmsd 2.0	Folddisco	0.016	0	result/M0699_e_coli_filtered_folddisco_Folddisco.tsv
query/M-CSA/single/M0699.txt	e_coli_filtered_folddisco	12	--covered-node-ratio 0.75 --skip-match	Folddisco_prefilter	0.015	0	result/M0699_e_coli_filtered_folddisco_Folddisco_prefilter.tsv
query/M-CSA/single/M0700.txt	e_coli_filtered_folddisco	12	--covered-node-ratio 0.75 --rmsd 2.0	Folddisco	0.021	2	result/M0700_e_coli_filtered_folddisco_Folddisco.tsv
query/M-CSA/single/M0700.txt	e_coli_filtered_folddisco	12	--covered-node-ratio 0.75 --skip-match	Folddisco_prefilter	0.011	1	result/M0700_e_coli_filtered_folddisco_Folddisco_prefilter.tsv
query/M-CSA/single/M0701.txt	e_coli_filtered_folddisco	12	--covered-node-ratio 0.75 --rmsd 2.0	Folddisco	0.037	24	result/M0701_e_coli_filtered_folddisco_Folddisco.tsv
query/M-CSA/single/M0701.txt	e_coli_filtered_folddisco	12	--covered-node-ratio 0.75 --skip-match	Folddisco_prefilter	0.012	24	result/M0701_e_coli_filtered_folddisco_Folddisco_prefilter.tsv
query/M-CSA/single/M0702.txt	e_coli_filtered_folddisco	12	--covered-node-ratio 0.75 --rmsd 2.0	Folddisco	0.03	3	result/M0702_e_coli_filtered_folddisco_Folddisco.tsv
query/M-CSA/single/M0702.txt	e_coli_filtered_folddisco	12	--covered-node-ratio 0.75 --skip-match	Folddisco_prefilter	0.013	1	result/M0702_e_coli_filtered_folddisco_Folddisco_prefilter.tsv
query/M-CSA/single/M0703.txt	e_coli_filtered_folddisco	12	--covered-node-ratio 0.75 --rmsd 2.0	Folddisco	0.023	3	result/M0703_e_coli_filtered_folddisco_Folddisco.tsv
query/M-CSA/single/M0703.txt	e_coli_filtered_folddisco	12	--covered-node-ratio 0.75 --skip-match	Folddisco_prefilter	0.012	2	result/M0703_e_coli_filtered_folddisco_Folddisco_prefilter.tsv
query/M-CSA/single/M0704.txt	e_coli_filtered_folddisco	12	--covered-node-ratio 0.75 --rmsd 2.0	Folddisco	0.029	5	result/M0704_e_coli_filtered_folddisco_Folddisco.tsv
query/M-CSA/single/M0704.txt	e_coli_filtered_folddisco	12	--covered-node-ratio 0.75 --skip-match	Folddisco_prefilter	0.014	5	result/M0704_e_coli_filtered_folddisco_Folddisco_prefilter.tsv
query/M-CSA/single/M0705.txt	e_coli_filtered_folddisco	12	--covered-node-ratio 0.75 --rmsd 2.0	Folddisco	0.036	15	result/M0705_e_coli_filtered_folddisco_Folddisco.tsv
query/M-CSA/single/M0705.txt	e_coli_filtered_folddisco	12	--covered-node-ratio 0.75 --skip-match	Folddisco_prefilter	0.012	7	result/M0705_e_coli_filtered_folddisco_Folddisco_prefilter.tsv
query/M-CSA/single/M0706.txt	e_coli_filtered_folddisco	12	--covered-node-ratio 0.75 --rmsd 2.0	Folddisco	0.037	7	result/M0706_e_coli_filtered_folddisco_Folddisco.tsv
query/M-CSA/single/M0706.txt	e_coli_filtered_folddisco	12	--covered-node-ratio 0.75 --skip-match	Folddisco_prefilter	0.015	7	result/M0706_e_coli_filtered_folddisco_Folddisco_prefilter.tsv
query/M-CSA/single/M0708.txt	e_coli_filtered_folddisco	12	--covered-node-ratio 0.75 --rmsd 2.0	Folddisco	0.041	32	result/M0708_e_coli_filtered_folddisco_Folddisco.tsv
query/M-CSA/single/M0708.txt	e_coli_filtered_folddisco	12	--covered-node-ratio 0.75 --skip-match	Folddisco_prefilter	0.015	32	result/M0708_e_coli_filtered_folddisco_Folddisco_prefilter.tsv
query/M-CSA/single/M0709.txt	e_coli_filtered_folddisco	12	--covered-node-ratio 0.75 --rmsd 2.0	Folddisco	0.039	22	result/M0709_e_coli_filtered_folddisco_Folddisco.tsv
query/M-CSA/single/M0709.txt	e_coli_filtered_folddisco	12	--covered-node-ratio 0.75 --skip-match	Folddisco_prefilter	0.013	9	result/M0709_e_coli_filtered_folddisco_Folddisco_prefilter.tsv
query/M-CSA/single/M0710.txt	e_coli_filtered_folddisco	12	--covered-node-ratio 0.75 --rmsd 2.0	Folddisco	0.019	2	result/M0710_e_coli_filtered_folddisco_Folddisco.tsv
query/M-CSA/single/M0710.txt	e_coli_filtered_folddisco	12	--covered-node-ratio 0.75 --skip-match	Folddisco_prefilter	0.012	2	result/M0710_e_coli_filtered_folddisco_Folddisco_prefilter.tsv
query/M-CSA/single/M0711.txt	e_coli_filtered_folddisco	12	--covered-node-ratio 0.75 --rmsd 2.0	Folddisco	0.027	2	result/M0711_e_coli_filtered_folddisco_Folddisco.tsv
query/M-CSA/single/M0711.txt	e_coli_filtered_folddisco	12	--covered-node-ratio 0.75 --skip-match	Folddisco_prefilter	0.016	1	result/M0711_e_coli_filtered_folddisco_Folddisco_prefilter.tsv
query/M-CSA/single/M0714.txt	e_coli_filtered_folddisco	12	--covered-node-ratio 0.75 --rmsd 2.0	Folddisco	0.069	0	result/M0714_e_coli_filtered_folddisco_Folddisco.tsv
query/M-CSA/single/M0714.txt	e_coli_filtered_folddisco	12	--covered-node-ratio 0.75 --skip-match	Folddisco_prefilter	0.029	2	result/M0714_e_coli_filtered_folddisco_Folddisco_prefilter.tsv
query/M-CSA/single/M0715.txt	e_coli_filtered_folddisco	12	--covered-node-ratio 0.75 --rmsd 2.0	Folddisco	0.019	4	result/M0715_e_coli_filtered_folddisco_Folddisco.tsv
query/M-CSA/single/M0715.txt	e_coli_filtered_folddisco	12	--covered-node-ratio 0.75 --skip-match	Folddisco_prefilter	0.012	3	result/M0715_e_coli_filtered_folddisco_Folddisco_prefilter.tsv
query/M-CSA/single/M0716.txt	e_coli_filtered_folddisco	12	--covered-node-ratio 0.75 --rmsd 2.0	Folddisco	0.018	2	result/M0716_e_coli_filtered_folddisco_Folddisco.tsv
query/M-CSA/single/M0716.txt	e_coli_filtered_folddisco	12	--covered-node-ratio 0.75 --skip-match	Folddisco_prefilter	0.011	2	result/M0716_e_coli_filtered_folddisco_Folddisco_prefilter.tsv
query/M-CSA/single/M0717.txt	e_coli_filtered_folddisco	12	--covered-node-ratio 0.75 --rmsd 2.0	Folddisco	0.045	20	result/M0717_e_coli_filtered_folddisco_Folddisco.tsv
query/M-CSA/single/M0717.txt	e_coli_filtered_folddisco	12	--covered-node-ratio 0.75 --skip-match	Folddisco_prefilter	0.016	20	result/M0717_e_coli_filtered_folddisco_Folddisco_prefilter.tsv
query/M-CSA/single/M0718.txt	e_coli_filtered_folddisco	12	--covered-node-ratio 0.75 --rmsd 2.0	Folddisco	0.085	140	result/M0718_e_coli_filtered_folddisco_Folddisco.tsv
query/M-CSA/single/M0718.txt	e_coli_filtered_folddisco	12	--covered-node-ratio 0.75 --skip-match	Folddisco_prefilter	0.015	64	result/M0718_e_coli_filtered_folddisco_Folddisco_prefilter.tsv
query/M-CSA/single/M0719.txt	e_coli_filtered_folddisco	12	--covered-node-ratio 0.75 --rmsd 2.0	Folddisco	0.017	0	result/M0719_e_coli_filtered_folddisco_Folddisco.tsv
query/M-CSA/single/M0719.txt	e_coli_filtered_folddisco	12	--covered-node-ratio 0.75 --skip-match	Folddisco_prefilter	0.013	0	result/M0719_e_coli_filtered_folddisco_Folddisco_prefilter.tsv
query/M-CSA/single/M0720.txt	e_coli_filtered_folddisco	12	--covered-node-ratio 0.75 --rmsd 2.0	Folddisco	0.04	18	result/M0720_e_coli_filtered_folddisco_Folddisco.tsv
query/M-CSA/single/M0720.txt	e_coli_filtered_folddisco	12	--covered-node-ratio 0.75 --skip-match	Folddisco_prefilter	0.016	18	result/M0720_e_coli_filtered_folddisco_Folddisco_prefilter.tsv
query/M-CSA/single/M0722.txt	e_coli_filtered_folddisco	12	--covered-node-ratio 0.75 --rmsd 2.0	Folddisco	0.031	8	result/M0722_e_coli_filtered_folddisco_Folddisco.tsv
query/M-CSA/single/M0722.txt	e_coli_filtered_folddisco	12	--covered-node-ratio 0.75 --skip-match	Folddisco_prefilter	0.019	8	result/M0722_e_coli_filtered_folddisco_Folddisco_prefilter.tsv
query/M-CSA/single/M0723.txt	e_coli_filtered_folddisco	12	--covered-node-ratio 0.75 --rmsd 2.0	Folddisco	0.033	6	result/M0723_e_coli_filtered_folddisco_Folddisco.tsv
query/M-CSA/single/M0723.txt	e_coli_filtered_folddisco	12	--covered-node-ratio 0.75 --skip-match	Folddisco_prefilter	0.012	3	result/M0723_e_coli_filtered_folddisco_Folddisco_prefilter.tsv
query/M-CSA/single/M0724.txt	e_coli_filtered_folddisco	12	--covered-node-ratio 0.75 --rmsd 2.0	Folddisco	0.046	19	result/M0724_e_coli_filtered_folddisco_Folddisco.tsv
query/M-CSA/single/M0724.txt	e_coli_filtered_folddisco	12	--covered-node-ratio 0.75 --skip-match	Folddisco_prefilter	0.013	12	result/M0724_e_coli_filtered_folddisco_Folddisco_prefilter.tsv
query/M-CSA/single/M0725.txt	e_coli_filtered_folddisco	12	--covered-node-ratio 0.75 --rmsd 2.0	Folddisco	0.026	10	result/M0725_e_coli_filtered_folddisco_Folddisco.tsv
query/M-CSA/single/M0725.txt	e_coli_filtered_folddisco	12	--covered-node-ratio 0.75 --skip-match	Folddisco_prefilter	0.013	9	result/M0725_e_coli_filtered_folddisco_Folddisco_prefilter.tsv
query/M-CSA/single/M0726.txt	e_coli_filtered_folddisco	12	--covered-node-ratio 0.75 --rmsd 2.0	Folddisco	0.018	0	result/M0726_e_coli_filtered_folddisco_Folddisco.tsv
query/M-CSA/single/M0726.txt	e_coli_filtered_folddisco	12	--covered-node-ratio 0.75 --skip-match	Folddisco_prefilter	0.016	0	result/M0726_e_coli_filtered_folddisco_Folddisco_prefilter.tsv
query/M-CSA/single/M0727.txt	e_coli_filtered_folddisco	12	--covered-node-ratio 0.75 --rmsd 2.0	Folddisco	0.041	1	result/M0727_e_coli_filtered_folddisco_Folddisco.tsv
query/M-CSA/single/M0727.txt	e_coli_filtered_folddisco	12	--covered-node-ratio 0.75 --skip-match	Folddisco_prefilter	0.016	12	result/M0727_e_coli_filtered_folddisco_Folddisco_prefilter.tsv
query/M-CSA/single/M0728.txt	e_coli_filtered_folddisco	12	--covered-node-ratio 0.75 --rmsd 2.0	Folddisco	0.039	21	result/M0728_e_coli_filtered_folddisco_Folddisco.tsv
query/M-CSA/single/M0728.txt	e_coli_filtered_folddisco	12	--covered-node-ratio 0.75 --skip-match	Folddisco_prefilter	0.014	20	result/M0728_e_coli_filtered_folddisco_Folddisco_prefilter.tsv
query/M-CSA/single/M0729.txt	e_coli_filtered_folddisco	12	--covered-node-ratio 0.75 --rmsd 2.0	Folddisco	0.019	0	result/M0729_e_coli_filtered_folddisco_Folddisco.tsv
query/M-CSA/single/M0729.txt	e_coli_filtered_folddisco	12	--covered-node-ratio 0.75 --skip-match	Folddisco_prefilter	0.014	0	result/M0729_e_coli_filtered_folddisco_Folddisco_prefilter.tsv
query/M-CSA/single/M0731.txt	e_coli_filtered_folddisco	12	--covered-node-ratio 0.75 --rmsd 2.0	Folddisco	0.124	24	result/M0731_e_coli_filtered_folddisco_Folddisco.tsv
query/M-CSA/single/M0731.txt	e_coli_filtered_folddisco	12	--covered-node-ratio 0.75 --skip-match	Folddisco_prefilter	0.054	56	result/M0731_e_coli_filtered_folddisco_Folddisco_prefilter.tsv
query/M-CSA/single/M0732.txt	e_coli_filtered_folddisco	12	--covered-node-ratio 0.75 --rmsd 2.0	Folddisco	0.083	103	result/M0732_e_coli_filtered_folddisco_Folddisco.tsv
query/M-CSA/single/M0732.txt	e_coli_filtered_folddisco	12	--covered-node-ratio 0.75 --skip-match	Folddisco_prefilter	0.018	70	result/M0732_e_coli_filtered_folddisco_Folddisco_prefilter.tsv
query/M-CSA/single/M0733.txt	e_coli_filtered_folddisco	12	--covered-node-ratio 0.75 --rmsd 2.0	Folddisco	0.034	3	result/M0733_e_coli_filtered_folddisco_Folddisco.tsv
query/M-CSA/single/M0733.txt	e_coli_filtered_folddisco	12	--covered-node-ratio 0.75 --skip-match	Folddisco_prefilter	0.013	2	result/M0733_e_coli_filtered_folddisco_Folddisco_prefilter.tsv
query/M-CSA/single/M0734.txt	e_coli_filtered_folddisco	12	--covered-node-ratio 0.75 --rmsd 2.0	Folddisco	0.02	4	result/M0734_e_coli_filtered_folddisco_Folddisco.tsv
query/M-CSA/single/M0734.txt	e_coli_filtered_folddisco	12	--covered-node-ratio 0.75 --skip-match	Folddisco_prefilter	0.011	2	result/M0734_e_coli_filtered_folddisco_Folddisco_prefilter.tsv
query/M-CSA/single/M0735.txt	e_coli_filtered_folddisco	12	--covered-node-ratio 0.75 --rmsd 2.0	Folddisco	0.027	0	result/M0735_e_coli_filtered_folddisco_Folddisco.tsv
query/M-CSA/single/M0735.txt	e_coli_filtered_folddisco	12	--covered-node-ratio 0.75 --skip-match	Folddisco_prefilter	0.015	1	result/M0735_e_coli_filtered_folddisco_Folddisco_prefilter.tsv
query/M-CSA/single/M0736.txt	e_coli_filtered_folddisco	12	--covered-node-ratio 0.75 --rmsd 2.0	Folddisco	0.021	0	result/M0736_e_coli_filtered_folddisco_Folddisco.tsv
query/M-CSA/single/M0736.txt	e_coli_filtered_folddisco	12	--covered-node-ratio 0.75 --skip-match	Folddisco_prefilter	0.016	0	result/M0736_e_coli_filtered_folddisco_Folddisco_prefilter.tsv
query/M-CSA/single/M0738.txt	e_coli_filtered_folddisco	12	--covered-node-ratio 0.75 --rmsd 2.0	Folddisco	0.038	8	result/M0738_e_coli_filtered_folddisco_Folddisco.tsv
query/M-CSA/single/M0738.txt	e_coli_filtered_folddisco	12	--covered-node-ratio 0.75 --skip-match	Folddisco_prefilter	0.015	4	result/M0738_e_coli_filtered_folddisco_Folddisco_prefilter.tsv
query/M-CSA/single/M0739.txt	e_coli_filtered_folddisco	12	--covered-node-ratio 0.75 --rmsd 2.0	Folddisco	0.018	0	result/M0739_e_coli_filtered_folddisco_Folddisco.tsv
query/M-CSA/single/M0739.txt	e_coli_filtered_folddisco	12	--covered-node-ratio 0.75 --skip-match	Folddisco_prefilter	0.014	0	result/M0739_e_coli_filtered_folddisco_Folddisco_prefilter.tsv
query/M-CSA/single/M0740.txt	e_coli_filtered_folddisco	12	--covered-node-ratio 0.75 --rmsd 2.0	Folddisco	0.032	8	result/M0740_e_coli_filtered_folddisco_Folddisco.tsv
query/M-CSA/single/M0740.txt	e_coli_filtered_folddisco	12	--covered-node-ratio 0.75 --skip-match	Folddisco_prefilter	0.014	8	result/M0740_e_coli_filtered_folddisco_Folddisco_prefilter.tsv
query/M-CSA/single/M0741.txt	e_coli_filtered_folddisco	12	--covered-node-ratio 0.75 --rmsd 2.0	Folddisco	0.077	173	result/M0741_e_coli_filtered_folddisco_Folddisco.tsv
query/M-CSA/single/M0741.txt	e_coli_filtered_folddisco	12	--covered-node-ratio 0.75 --skip-match	Folddisco_prefilter	0.016	170	result/M0741_e_coli_filtered_folddisco_Folddisco_prefilter.tsv
query/M-CSA/single/M0742.txt	e_coli_filtered_folddisco	12	--covered-node-ratio 0.75 --rmsd 2.0	Folddisco	0.024	2	result/M0742_e_coli_filtered_folddisco_Folddisco.tsv
query/M-CSA/single/M0742.txt	e_coli_filtered_folddisco	12	--covered-node-ratio 0.75 --skip-match	Folddisco_prefilter	0.014	1	result/M0742_e_coli_filtered_folddisco_Folddisco_prefilter.tsv
query/M-CSA/single/M0744.txt	e_coli_filtered_folddisco	12	--covered-node-ratio 0.75 --rmsd 2.0	Folddisco	0.057	3	result/M0744_e_coli_filtered_folddisco_Folddisco.tsv
query/M-CSA/single/M0744.txt	e_coli_filtered_folddisco	12	--covered-node-ratio 0.75 --skip-match	Folddisco_prefilter	0.013	3	result/M0744_e_coli_filtered_folddisco_Folddisco_prefilter.tsv
query/M-CSA/single/M0745.txt	e_coli_filtered_folddisco	12	--covered-node-ratio 0.75 --rmsd 2.0	Folddisco	0.016	0	result/M0745_e_coli_filtered_folddisco_Folddisco.tsv
query/M-CSA/single/M0745.txt	e_coli_filtered_folddisco	12	--covered-node-ratio 0.75 --skip-match	Folddisco_prefilter	0.011	0	result/M0745_e_coli_filtered_folddisco_Folddisco_prefilter.tsv
query/M-CSA/single/M0746.txt	e_coli_filtered_folddisco	12	--covered-node-ratio 0.75 --rmsd 2.0	Folddisco	0.022	0	result/M0746_e_coli_filtered_folddisco_Folddisco.tsv
query/M-CSA/single/M0746.txt	e_coli_filtered_folddisco	12	--covered-node-ratio 0.75 --skip-match	Folddisco_prefilter	0.017	0	result/M0746_e_coli_filtered_folddisco_Folddisco_prefilter.tsv
query/M-CSA/single/M0747.txt	e_coli_filtered_folddisco	12	--covered-node-ratio 0.75 --rmsd 2.0	Folddisco	0.033	4	result/M0747_e_coli_filtered_folddisco_Folddisco.tsv
query/M-CSA/single/M0747.txt	e_coli_filtered_folddisco	12	--covered-node-ratio 0.75 --skip-match	Folddisco_prefilter	0.017	4	result/M0747_e_coli_filtered_folddisco_Folddisco_prefilter.tsv
query/M-CSA/single/M0748.txt	e_coli_filtered_folddisco	12	--covered-node-ratio 0.75 --rmsd 2.0	Folddisco	0.046	20	result/M0748_e_coli_filtered_folddisco_Folddisco.tsv
query/M-CSA/single/M0748.txt	e_coli_filtered_folddisco	12	--covered-node-ratio 0.75 --skip-match	Folddisco_prefilter	0.011	10	result/M0748_e_coli_filtered_folddisco_Folddisco_prefilter.tsv
query/M-CSA/single/M0751.txt	e_coli_filtered_folddisco	12	--covered-node-ratio 0.75 --rmsd 2.0	Folddisco	0.307	2215	result/M0751_e_coli_filtered_folddisco_Folddisco.tsv
query/M-CSA/single/M0751.txt	e_coli_filtered_folddisco	12	--covered-node-ratio 0.75 --skip-match	Folddisco_prefilter	0.022	791	result/M0751_e_coli_filtered_folddisco_Folddisco_prefilter.tsv
query/M-CSA/single/M0752.txt	e_coli_filtered_folddisco	12	--covered-node-ratio 0.75 --rmsd 2.0	Folddisco	0.082	293	result/M0752_e_coli_filtered_folddisco_Folddisco.tsv
query/M-CSA/single/M0752.txt	e_coli_filtered_folddisco	12	--covered-node-ratio 0.75 --skip-match	Folddisco_prefilter	0.012	129	result/M0752_e_coli_filtered_folddisco_Folddisco_prefilter.tsv
query/M-CSA/single/M0753.txt	e_coli_filtered_folddisco	12	--covered-node-ratio 0.75 --rmsd 2.0	Folddisco	0.05	58	result/M0753_e_coli_filtered_folddisco_Folddisco.tsv
query/M-CSA/single/M0753.txt	e_coli_filtered_folddisco	12	--covered-node-ratio 0.75 --skip-match	Folddisco_prefilter	0.011	58	result/M0753_e_coli_filtered_folddisco_Folddisco_prefilter.tsv
query/M-CSA/single/M0754.txt	e_coli_filtered_folddisco	12	--covered-node-ratio 0.75 --rmsd 2.0	Folddisco	0.014	1	result/M0754_e_coli_filtered_folddisco_Folddisco.tsv
query/M-CSA/single/M0754.txt	e_coli_filtered_folddisco	12	--covered-node-ratio 0.75 --skip-match	Folddisco_prefilter	0.01	1	result/M0754_e_coli_filtered_folddisco_Folddisco_prefilter.tsv
query/M-CSA/single/M0755.txt	e_coli_filtered_folddisco	12	--covered-node-ratio 0.75 --rmsd 2.0	Folddisco	0.024	2	result/M0755_e_coli_filtered_folddisco_Folddisco.tsv
query/M-CSA/single/M0755.txt	e_coli_filtered_folddisco	12	--covered-node-ratio 0.75 --skip-match	Folddisco_prefilter	0.012	1	result/M0755_e_coli_filtered_folddisco_Folddisco_prefilter.tsv
query/M-CSA/single/M0756.txt	e_coli_filtered_folddisco	12	--covered-node-ratio 0.75 --rmsd 2.0	Folddisco	0.029	5	result/M0756_e_coli_filtered_folddisco_Folddisco.tsv
query/M-CSA/single/M0756.txt	e_coli_filtered_folddisco	12	--covered-node-ratio 0.75 --skip-match	Folddisco_prefilter	0.012	2	result/M0756_e_coli_filtered_folddisco_Folddisco_prefilter.tsv
query/M-CSA/single/M0757.txt	e_coli_filtered_folddisco	12	--covered-node-ratio 0.75 --rmsd 2.0	Folddisco	0.014	0	result/M0757_e_coli_filtered_folddisco_Folddisco.tsv
query/M-CSA/single/M0757.txt	e_coli_filtered_folddisco	12	--covered-node-ratio 0.75 --skip-match	Folddisco_prefilter	0.011	0	result/M0757_e_coli_filtered_folddisco_Folddisco_prefilter.tsv
query/M-CSA/single/M0758.txt	e_coli_filtered_folddisco	12	--covered-node-ratio 0.75 --rmsd 2.0	Folddisco	0.045	42	result/M0758_e_coli_filtered_folddisco_Folddisco.tsv
query/M-CSA/single/M0758.txt	e_coli_filtered_folddisco	12	--covered-node-ratio 0.75 --skip-match	Folddisco_prefilter	0.013	22	result/M0758_e_coli_filtered_folddisco_Folddisco_prefilter.tsv
query/M-CSA/single/M0759.txt	e_coli_filtered_folddisco	12	--covered-node-ratio 0.75 --rmsd 2.0	Folddisco	0.022	0	result/M0759_e_coli_filtered_folddisco_Folddisco.tsv
query/M-CSA/single/M0759.txt	e_coli_filtered_folddisco	12	--covered-node-ratio 0.75 --skip-match	Folddisco_prefilter	0.015	0	result/M0759_e_coli_filtered_folddisco_Folddisco_prefilter.tsv
query/M-CSA/single/M0760.txt	e_coli_filtered_folddisco	12	--covered-node-ratio 0.75 --rmsd 2.0	Folddisco	0.062	37	result/M0760_e_coli_filtered_folddisco_Folddisco.tsv
query/M-CSA/single/M0760.txt	e_coli_filtered_folddisco	12	--covered-node-ratio 0.75 --skip-match	Folddisco_prefilter	0.012	37	result/M0760_e_coli_filtered_folddisco_Folddisco_prefilter.tsv
query/M-CSA/single/M0761.txt	e_coli_filtered_folddisco	12	--covered-node-ratio 0.75 --rmsd 2.0	Folddisco	0.036	5	result/M0761_e_coli_filtered_folddisco_Folddisco.tsv
query/M-CSA/single/M0761.txt	e_coli_filtered_folddisco	12	--covered-node-ratio 0.75 --skip-match	Folddisco_prefilter	0.016	2	result/M0761_e_coli_filtered_folddisco_Folddisco_prefilter.tsv
query/M-CSA/single/M0762.txt	e_coli_filtered_folddisco	12	--covered-node-ratio 0.75 --rmsd 2.0	Folddisco	0.026	3	result/M0762_e_coli_filtered_folddisco_Folddisco.tsv
query/M-CSA/single/M0762.txt	e_coli_filtered_folddisco	12	--covered-node-ratio 0.75 --skip-match	Folddisco_prefilter	0.015	3	result/M0762_e_coli_filtered_folddisco_Folddisco_prefilter.tsv
query/M-CSA/single/M0763.txt	e_coli_filtered_folddisco	12	--covered-node-ratio 0.75 --rmsd 2.0	Folddisco	0.034	16	result/M0763_e_coli_filtered_folddisco_Folddisco.tsv
query/M-CSA/single/M0763.txt	e_coli_filtered_folddisco	12	--covered-node-ratio 0.75 --skip-match	Folddisco_prefilter	0.014	8	result/M0763_e_coli_filtered_folddisco_Folddisco_prefilter.tsv
query/M-CSA/single/M0764.txt	e_coli_filtered_folddisco	12	--covered-node-ratio 0.75 --rmsd 2.0	Folddisco	0.025	2	result/M0764_e_coli_filtered_folddisco_Folddisco.tsv
query/M-CSA/single/M0764.txt	e_coli_filtered_folddisco	12	--covered-node-ratio 0.75 --skip-match	Folddisco_prefilter	0.014	2	result/M0764_e_coli_filtered_folddisco_Folddisco_prefilter.tsv
query/M-CSA/single/M0766.txt	e_coli_filtered_folddisco	12	--covered-node-ratio 0.75 --rmsd 2.0	Folddisco	0.031	11	result/M0766_e_coli_filtered_folddisco_Folddisco.tsv
query/M-CSA/single/M0766.txt	e_coli_filtered_folddisco	12	--covered-node-ratio 0.75 --skip-match	Folddisco_prefilter	0.012	11	result/M0766_e_coli_filtered_folddisco_Folddisco_prefilter.tsv
query/M-CSA/single/M0767.txt	e_coli_filtered_folddisco	12	--covered-node-ratio 0.75 --rmsd 2.0	Folddisco	0.021	1	result/M0767_e_coli_filtered_folddisco_Folddisco.tsv
query/M-CSA/single/M0767.txt	e_coli_filtered_folddisco	12	--covered-node-ratio 0.75 --skip-match	Folddisco_prefilter	0.014	1	result/M0767_e_coli_filtered_folddisco_Folddisco_prefilter.tsv
query/M-CSA/single/M0768.txt	e_coli_filtered_folddisco	12	--covered-node-ratio 0.75 --rmsd 2.0	Folddisco	0.016	0	result/M0768_e_coli_filtered_folddisco_Folddisco.tsv
query/M-CSA/single/M0768.txt	e_coli_filtered_folddisco	12	--covered-node-ratio 0.75 --skip-match	Folddisco_prefilter	0.011	0	result/M0768_e_coli_filtered_folddisco_Folddisco_prefilter.tsv
query/M-CSA/single/M0771.txt	e_coli_filtered_folddisco	12	--covered-node-ratio 0.75 --rmsd 2.0	Folddisco	0.018	1	result/M0771_e_coli_filtered_folddisco_Folddisco.tsv
query/M-CSA/single/M0771.txt	e_coli_filtered_folddisco	12	--covered-node-ratio 0.75 --skip-match	Folddisco_prefilter	0.012	1	result/M0771_e_coli_filtered_folddisco_Folddisco_prefilter.tsv
query/M-CSA/single/M0774.txt	e_coli_filtered_folddisco	12	--covered-node-ratio 0.75 --rmsd 2.0	Folddisco	0.018	0	result/M0774_e_coli_filtered_folddisco_Folddisco.tsv
query/M-CSA/single/M0774.txt	e_coli_filtered_folddisco	12	--covered-node-ratio 0.75 --skip-match	Folddisco_prefilter	0.011	0	result/M0774_e_coli_filtered_folddisco_Folddisco_prefilter.tsv
query/M-CSA/single/M0776.txt	e_coli_filtered_folddisco	12	--covered-node-ratio 0.75 --rmsd 2.0	Folddisco	0.051	25	result/M0776_e_coli_filtered_folddisco_Folddisco.tsv
query/M-CSA/single/M0776.txt	e_coli_filtered_folddisco	12	--covered-node-ratio 0.75 --skip-match	Folddisco_prefilter	0.013	11	result/M0776_e_coli_filtered_folddisco_Folddisco_prefilter.tsv
query/M-CSA/single/M0777.txt	e_coli_filtered_folddisco	12	--covered-node-ratio 0.75 --rmsd 2.0	Folddisco	0.017	0	result/M0777_e_coli_filtered_folddisco_Folddisco.tsv
query/M-CSA/single/M0777.txt	e_coli_filtered_folddisco	12	--covered-node-ratio 0.75 --skip-match	Folddisco_prefilter	0.012	0	result/M0777_e_coli_filtered_folddisco_Folddisco_prefilter.tsv
query/M-CSA/single/M0780.txt	e_coli_filtered_folddisco	12	--covered-node-ratio 0.75 --rmsd 2.0	Folddisco	0.041	33	result/M0780_e_coli_filtered_folddisco_Folddisco.tsv
query/M-CSA/single/M0780.txt	e_coli_filtered_folddisco	12	--covered-node-ratio 0.75 --skip-match	Folddisco_prefilter	0.014	33	result/M0780_e_coli_filtered_folddisco_Folddisco_prefilter.tsv
query/M-CSA/single/M0781.txt	e_coli_filtered_folddisco	12	--covered-node-ratio 0.75 --rmsd 2.0	Folddisco	0.016	0	result/M0781_e_coli_filtered_folddisco_Folddisco.tsv
query/M-CSA/single/M0781.txt	e_coli_filtered_folddisco	12	--covered-node-ratio 0.75 --skip-match	Folddisco_prefilter	0.012	0	result/M0781_e_coli_filtered_folddisco_Folddisco_prefilter.tsv
query/M-CSA/single/M0782.txt	e_coli_filtered_folddisco	12	--covered-node-ratio 0.75 --rmsd 2.0	Folddisco	0.024	4	result/M0782_e_coli_filtered_folddisco_Folddisco.tsv
query/M-CSA/single/M0782.txt	e_coli_filtered_folddisco	12	--covered-node-ratio 0.75 --skip-match	Folddisco_prefilter	0.013	4	result/M0782_e_coli_filtered_folddisco_Folddisco_prefilter.tsv
query/M-CSA/single/M0783.txt	e_coli_filtered_folddisco	12	--covered-node-ratio 0.75 --rmsd 2.0	Folddisco	0.032	8	result/M0783_e_coli_filtered_folddisco_Folddisco.tsv
query/M-CSA/single/M0783.txt	e_coli_filtered_folddisco	12	--covered-node-ratio 0.75 --skip-match	Folddisco_prefilter	0.011	8	result/M0783_e_coli_filtered_folddisco_Folddisco_prefilter.tsv
query/M-CSA/single/M0784.txt	e_coli_filtered_folddisco	12	--covered-node-ratio 0.75 --rmsd 2.0	Folddisco	0.033	29	result/M0784_e_coli_filtered_folddisco_Folddisco.tsv
query/M-CSA/single/M0784.txt	e_coli_filtered_folddisco	12	--covered-node-ratio 0.75 --skip-match	Folddisco_prefilter	0.011	29	result/M0784_e_coli_filtered_folddisco_Folddisco_prefilter.tsv
query/M-CSA/single/M0785.txt	e_coli_filtered_folddisco	12	--covered-node-ratio 0.75 --rmsd 2.0	Folddisco	0.031	8	result/M0785_e_coli_filtered_folddisco_Folddisco.tsv
query/M-CSA/single/M0785.txt	e_coli_filtered_folddisco	12	--covered-node-ratio 0.75 --skip-match	Folddisco_prefilter	0.013	8	result/M0785_e_coli_filtered_folddisco_Folddisco_prefilter.tsv
query/M-CSA/single/M0786.txt	e_coli_filtered_folddisco	12	--covered-node-ratio 0.75 --rmsd 2.0	Folddisco	0.039	21	result/M0786_e_coli_filtered_folddisco_Folddisco.tsv
query/M-CSA/single/M0786.txt	e_coli_filtered_folddisco	12	--covered-node-ratio 0.75 --skip-match	Folddisco_prefilter	0.011	21	result/M0786_e_coli_filtered_folddisco_Folddisco_prefilter.tsv
query/M-CSA/single/M0787.txt	e_coli_filtered_folddisco	12	--covered-node-ratio 0.75 --rmsd 2.0	Folddisco	0.016	0	result/M0787_e_coli_filtered_folddisco_Folddisco.tsv
query/M-CSA/single/M0787.txt	e_coli_filtered_folddisco	12	--covered-node-ratio 0.75 --skip-match	Folddisco_prefilter	0.015	0	result/M0787_e_coli_filtered_folddisco_Folddisco_prefilter.tsv
query/M-CSA/single/M0789.txt	e_coli_filtered_folddisco	12	--covered-node-ratio 0.75 --rmsd 2.0	Folddisco	0.028	1	result/M0789_e_coli_filtered_folddisco_Folddisco.tsv
query/M-CSA/single/M0789.txt	e_coli_filtered_folddisco	12	--covered-node-ratio 0.75 --skip-match	Folddisco_prefilter	0.018	1	result/M0789_e_coli_filtered_folddisco_Folddisco_prefilter.tsv
query/M-CSA/single/M0790.txt	e_coli_filtered_folddisco	12	--covered-node-ratio 0.75 --rmsd 2.0	Folddisco	0.037	6	result/M0790_e_coli_filtered_folddisco_Folddisco.tsv
query/M-CSA/single/M0790.txt	e_coli_filtered_folddisco	12	--covered-node-ratio 0.75 --skip-match	Folddisco_prefilter	0.014	6	result/M0790_e_coli_filtered_folddisco_Folddisco_prefilter.tsv
query/M-CSA/single/M0791.txt	e_coli_filtered_folddisco	12	--covered-node-ratio 0.75 --rmsd 2.0	Folddisco	0.036	12	result/M0791_e_coli_filtered_folddisco_Folddisco.tsv
query/M-CSA/single/M0791.txt	e_coli_filtered_folddisco	12	--covered-node-ratio 0.75 --skip-match	Folddisco_prefilter	0.013	9	result/M0791_e_coli_filtered_folddisco_Folddisco_prefilter.tsv
query/M-CSA/single/M0792.txt	e_coli_filtered_folddisco	12	--covered-node-ratio 0.75 --rmsd 2.0	Folddisco	0.043	34	result/M0792_e_coli_filtered_folddisco_Folddisco.tsv
query/M-CSA/single/M0792.txt	e_coli_filtered_folddisco	12	--covered-node-ratio 0.75 --skip-match	Folddisco_prefilter	0.015	8	result/M0792_e_coli_filtered_folddisco_Folddisco_prefilter.tsv
query/M-CSA/single/M0793.txt	e_coli_filtered_folddisco	12	--covered-node-ratio 0.75 --rmsd 2.0	Folddisco	0.05	36	result/M0793_e_coli_filtered_folddisco_Folddisco.tsv
query/M-CSA/single/M0793.txt	e_coli_filtered_folddisco	12	--covered-node-ratio 0.75 --skip-match	Folddisco_prefilter	0.015	36	result/M0793_e_coli_filtered_folddisco_Folddisco_prefilter.tsv
query/M-CSA/single/M0794.txt	e_coli_filtered_folddisco	12	--covered-node-ratio 0.75 --rmsd 2.0	Folddisco	0.036	10	result/M0794_e_coli_filtered_folddisco_Folddisco.tsv
query/M-CSA/single/M0794.txt	e_coli_filtered_folddisco	12	--covered-node-ratio 0.75 --skip-match	Folddisco_prefilter	0.013	6	result/M0794_e_coli_filtered_folddisco_Folddisco_prefilter.tsv
query/M-CSA/single/M0795.txt	e_coli_filtered_folddisco	12	--covered-node-ratio 0.75 --rmsd 2.0	Folddisco	0.073	68	result/M0795_e_coli_filtered_folddisco_Folddisco.tsv
query/M-CSA/single/M0795.txt	e_coli_filtered_folddisco	12	--covered-node-ratio 0.75 --skip-match	Folddisco_prefilter	0.021	37	result/M0795_e_coli_filtered_folddisco_Folddisco_prefilter.tsv
query/M-CSA/single/M0797.txt	e_coli_filtered_folddisco	12	--covered-node-ratio 0.75 --rmsd 2.0	Folddisco	0.036	7	result/M0797_e_coli_filtered_folddisco_Folddisco.tsv
query/M-CSA/single/M0797.txt	e_coli_filtered_folddisco	12	--covered-node-ratio 0.75 --skip-match	Folddisco_prefilter	0.015	7	result/M0797_e_coli_filtered_folddisco_Folddisco_prefilter.tsv
query/M-CSA/single/M0798.txt	e_coli_filtered_folddisco	12	--covered-node-ratio 0.75 --rmsd 2.0	Folddisco	0.074	192	result/M0798_e_coli_filtered_folddisco_Folddisco.tsv
query/M-CSA/single/M0798.txt	e_coli_filtered_folddisco	12	--covered-node-ratio 0.75 --skip-match	Folddisco_prefilter	0.013	86	result/M0798_e_coli_filtered_folddisco_Folddisco_prefilter.tsv
query/M-CSA/single/M0799.txt	e_coli_filtered_folddisco	12	--covered-node-ratio 0.75 --rmsd 2.0	Folddisco	0.071	161	result/M0799_e_coli_filtered_folddisco_Folddisco.tsv
query/M-CSA/single/M0799.txt	e_coli_filtered_folddisco	12	--covered-node-ratio 0.75 --skip-match	Folddisco_prefilter	0.015	157	result/M0799_e_coli_filtered_folddisco_Folddisco_prefilter.tsv
query/M-CSA/single/M0802.txt	e_coli_filtered_folddisco	12	--covered-node-ratio 0.75 --rmsd 2.0	Folddisco	0.066	101	result/M0802_e_coli_filtered_folddisco_Folddisco.tsv
query/M-CSA/single/M0802.txt	e_coli_filtered_folddisco	12	--covered-node-ratio 0.75 --skip-match	Folddisco_prefilter	0.012	100	result/M0802_e_coli_filtered_folddisco_Folddisco_prefilter.tsv
query/M-CSA/single/M0803.txt	e_coli_filtered_folddisco	12	--covered-node-ratio 0.75 --rmsd 2.0	Folddisco	0.074	43	result/M0803_e_coli_filtered_folddisco_Folddisco.tsv
query/M-CSA/single/M0803.txt	e_coli_filtered_folddisco	12	--covered-node-ratio 0.75 --skip-match	Folddisco_prefilter	0.032	25	result/M0803_e_coli_filtered_folddisco_Folddisco_prefilter.tsv
query/M-CSA/single/M0804.txt	e_coli_filtered_folddisco	12	--covered-node-ratio 0.75 --rmsd 2.0	Folddisco	0.047	49	result/M0804_e_coli_filtered_folddisco_Folddisco.tsv
query/M-CSA/single/M0804.txt	e_coli_filtered_folddisco	12	--covered-node-ratio 0.75 --skip-match	Folddisco_prefilter	0.013	47	result/M0804_e_coli_filtered_folddisco_Folddisco_prefilter.tsv
query/M-CSA/single/M0805.txt	e_coli_filtered_folddisco	12	--covered-node-ratio 0.75 --rmsd 2.0	Folddisco	0.026	1	result/M0805_e_coli_filtered_folddisco_Folddisco.tsv
query/M-CSA/single/M0805.txt	e_coli_filtered_folddisco	12	--covered-node-ratio 0.75 --skip-match	Folddisco_prefilter	0.018	1	result/M0805_e_coli_filtered_folddisco_Folddisco_prefilter.tsv
query/M-CSA/single/M0806.txt	e_coli_filtered_folddisco	12	--covered-node-ratio 0.75 --rmsd 2.0	Folddisco	0.029	15	result/M0806_e_coli_filtered_folddisco_Folddisco.tsv
query/M-CSA/single/M0806.txt	e_coli_filtered_folddisco	12	--covered-node-ratio 0.75 --skip-match	Folddisco_prefilter	0.015	8	result/M0806_e_coli_filtered_folddisco_Folddisco_prefilter.tsv
query/M-CSA/single/M0807.txt	e_coli_filtered_folddisco	12	--covered-node-ratio 0.75 --rmsd 2.0	Folddisco	0.033	16	result/M0807_e_coli_filtered_folddisco_Folddisco.tsv
query/M-CSA/single/M0807.txt	e_coli_filtered_folddisco	12	--covered-node-ratio 0.75 --skip-match	Folddisco_prefilter	0.012	15	result/M0807_e_coli_filtered_folddisco_Folddisco_prefilter.tsv
query/M-CSA/single/M0808.txt	e_coli_filtered_folddisco	12	--covered-node-ratio 0.75 --rmsd 2.0	Folddisco	0.07	53	result/M0808_e_coli_filtered_folddisco_Folddisco.tsv
query/M-CSA/single/M0808.txt	e_coli_filtered_folddisco	12	--covered-node-ratio 0.75 --skip-match	Folddisco_prefilter	0.036	25	result/M0808_e_coli_filtered_folddisco_Folddisco_prefilter.tsv
query/M-CSA/single/M0810.txt	e_coli_filtered_folddisco	12	--covered-node-ratio 0.75 --rmsd 2.0	Folddisco	0.037	5	result/M0810_e_coli_filtered_folddisco_Folddisco.tsv
query/M-CSA/single/M0810.txt	e_coli_filtered_folddisco	12	--covered-node-ratio 0.75 --skip-match	Folddisco_prefilter	0.016	2	result/M0810_e_coli_filtered_folddisco_Folddisco_prefilter.tsv
query/M-CSA/single/M0812.txt	e_coli_filtered_folddisco	12	--covered-node-ratio 0.75 --rmsd 2.0	Folddisco	0.044	28	result/M0812_e_coli_filtered_folddisco_Folddisco.tsv
query/M-CSA/single/M0812.txt	e_coli_filtered_folddisco	12	--covered-node-ratio 0.75 --skip-match	Folddisco_prefilter	0.011	28	result/M0812_e_coli_filtered_folddisco_Folddisco_prefilter.tsv
query/M-CSA/single/M0814.txt	e_coli_filtered_folddisco	12	--covered-node-ratio 0.75 --rmsd 2.0	Folddisco	0.02	5	result/M0814_e_coli_filtered_folddisco_Folddisco.tsv
query/M-CSA/single/M0814.txt	e_coli_filtered_folddisco	12	--covered-node-ratio 0.75 --skip-match	Folddisco_prefilter	0.013	2	result/M0814_e_coli_filtered_folddisco_Folddisco_prefilter.tsv
query/M-CSA/single/M0815.txt	e_coli_filtered_folddisco	12	--covered-node-ratio 0.75 --rmsd 2.0	Folddisco	0.019	1	result/M0815_e_coli_filtered_folddisco_Folddisco.tsv
query/M-CSA/single/M0815.txt	e_coli_filtered_folddisco	12	--covered-node-ratio 0.75 --skip-match	Folddisco_prefilter	0.012	1	result/M0815_e_coli_filtered_folddisco_Folddisco_prefilter.tsv
query/M-CSA/single/M0816.txt	e_coli_filtered_folddisco	12	--covered-node-ratio 0.75 --rmsd 2.0	Folddisco	0.028	21	result/M0816_e_coli_filtered_folddisco_Folddisco.tsv
query/M-CSA/single/M0816.txt	e_coli_filtered_folddisco	12	--covered-node-ratio 0.75 --skip-match	Folddisco_prefilter	0.014	11	result/M0816_e_coli_filtered_folddisco_Folddisco_prefilter.tsv
query/M-CSA/single/M0817.txt	e_coli_filtered_folddisco	12	--covered-node-ratio 0.75 --rmsd 2.0	Folddisco	0.069	97	result/M0817_e_coli_filtered_folddisco_Folddisco.tsv
query/M-CSA/single/M0817.txt	e_coli_filtered_folddisco	12	--covered-node-ratio 0.75 --skip-match	Folddisco_prefilter	0.013	95	result/M0817_e_coli_filtered_folddisco_Folddisco_prefilter.tsv
query/M-CSA/single/M0818.txt	e_coli_filtered_folddisco	12	--covered-node-ratio 0.75 --rmsd 2.0	Folddisco	0.016	0	result/M0818_e_coli_filtered_folddisco_Folddisco.tsv
query/M-CSA/single/M0818.txt	e_coli_filtered_folddisco	12	--covered-node-ratio 0.75 --skip-match	Folddisco_prefilter	0.012	0	result/M0818_e_coli_filtered_folddisco_Folddisco_prefilter.tsv
query/M-CSA/single/M0819.txt	e_coli_filtered_folddisco	12	--covered-node-ratio 0.75 --rmsd 2.0	Folddisco	0.018	1	result/M0819_e_coli_filtered_folddisco_Folddisco.tsv
query/M-CSA/single/M0819.txt	e_coli_filtered_folddisco	12	--covered-node-ratio 0.75 --skip-match	Folddisco_prefilter	0.012	1	result/M0819_e_coli_filtered_folddisco_Folddisco_prefilter.tsv
query/M-CSA/single/M0820.txt	e_coli_filtered_folddisco	12	--covered-node-ratio 0.75 --rmsd 2.0	Folddisco	0.022	2	result/M0820_e_coli_filtered_folddisco_Folddisco.tsv
query/M-CSA/single/M0820.txt	e_coli_filtered_folddisco	12	--covered-node-ratio 0.75 --skip-match	Folddisco_prefilter	0.011	1	result/M0820_e_coli_filtered_folddisco_Folddisco_prefilter.tsv
query/M-CSA/single/M0821.txt	e_coli_filtered_folddisco	12	--covered-node-ratio 0.75 --rmsd 2.0	Folddisco	0.074	16	result/M0821_e_coli_filtered_folddisco_Folddisco.tsv
query/M-CSA/single/M0821.txt	e_coli_filtered_folddisco	12	--covered-node-ratio 0.75 --skip-match	Folddisco_prefilter	0.016	74	result/M0821_e_coli_filtered_folddisco_Folddisco_prefilter.tsv
query/M-CSA/single/M0822.txt	e_coli_filtered_folddisco	12	--covered-node-ratio 0.75 --rmsd 2.0	Folddisco	0.079	184	result/M0822_e_coli_filtered_folddisco_Folddisco.tsv
query/M-CSA/single/M0822.txt	e_coli_filtered_folddisco	12	--covered-node-ratio 0.75 --skip-match	Folddisco_prefilter	0.019	77	result/M0822_e_coli_filtered_folddisco_Folddisco_prefilter.tsv
query/M-CSA/single/M0823.txt	e_coli_filtered_folddisco	12	--covered-node-ratio 0.75 --rmsd 2.0	Folddisco	0.063	117	result/M0823_e_coli_filtered_folddisco_Folddisco.tsv
query/M-CSA/single/M0823.txt	e_coli_filtered_folddisco	12	--covered-node-ratio 0.75 --skip-match	Folddisco_prefilter	0.012	117	result/M0823_e_coli_filtered_folddisco_Folddisco_prefilter.tsv
query/M-CSA/single/M0825.txt	e_coli_filtered_folddisco	12	--covered-node-ratio 0.75 --rmsd 2.0	Folddisco	0.297	2044	result/M0825_e_coli_filtered_folddisco_Folddisco.tsv
query/M-CSA/single/M0825.txt	e_coli_filtered_folddisco	12	--covered-node-ratio 0.75 --skip-match	Folddisco_prefilter	0.018	1404	result/M0825_e_coli_filtered_folddisco_Folddisco_prefilter.tsv
query/M-CSA/single/M0826.txt	e_coli_filtered_folddisco	12	--covered-node-ratio 0.75 --rmsd 2.0	Folddisco	0.051	40	result/M0826_e_coli_filtered_folddisco_Folddisco.tsv
query/M-CSA/single/M0826.txt	e_coli_filtered_folddisco	12	--covered-node-ratio 0.75 --skip-match	Folddisco_prefilter	0.014	20	result/M0826_e_coli_filtered_folddisco_Folddisco_prefilter.tsv
query/M-CSA/single/M0827.txt	e_coli_filtered_folddisco	12	--covered-node-ratio 0.75 --rmsd 2.0	Folddisco	0.035	4	result/M0827_e_coli_filtered_folddisco_Folddisco.tsv
query/M-CSA/single/M0827.txt	e_coli_filtered_folddisco	12	--covered-node-ratio 0.75 --skip-match	Folddisco_prefilter	0.013	4	result/M0827_e_coli_filtered_folddisco_Folddisco_prefilter.tsv
query/M-CSA/single/M0828.txt	e_coli_filtered_folddisco	12	--covered-node-ratio 0.75 --rmsd 2.0	Folddisco	0.029	16	result/M0828_e_coli_filtered_folddisco_Folddisco.tsv
query/M-CSA/single/M0828.txt	e_coli_filtered_folddisco	12	--covered-node-ratio 0.75 --skip-match	Folddisco_prefilter	0.015	8	result/M0828_e_coli_filtered_folddisco_Folddisco_prefilter.tsv
query/M-CSA/single/M0829.txt	e_coli_filtered_folddisco	12	--covered-node-ratio 0.75 --rmsd 2.0	Folddisco	0.038	3	result/M0829_e_coli_filtered_folddisco_Folddisco.tsv
query/M-CSA/single/M0829.txt	e_coli_filtered_folddisco	12	--covered-node-ratio 0.75 --skip-match	Folddisco_prefilter	0.026	3	result/M0829_e_coli_filtered_folddisco_Folddisco_prefilter.tsv
query/M-CSA/single/M0830.txt	e_coli_filtered_folddisco	12	--covered-node-ratio 0.75 --rmsd 2.0	Folddisco	0.027	3	result/M0830_e_coli_filtered_folddisco_Folddisco.tsv
query/M-CSA/single/M0830.txt	e_coli_filtered_folddisco	12	--covered-node-ratio 0.75 --skip-match	Folddisco_prefilter	0.013	3	result/M0830_e_coli_filtered_folddisco_Folddisco_prefilter.tsv
query/M-CSA/single/M0831.txt	e_coli_filtered_folddisco	12	--covered-node-ratio 0.75 --rmsd 2.0	Folddisco	0.04	23	result/M0831_e_coli_filtered_folddisco_Folddisco.tsv
query/M-CSA/single/M0831.txt	e_coli_filtered_folddisco	12	--covered-node-ratio 0.75 --skip-match	Folddisco_prefilter	0.013	23	result/M0831_e_coli_filtered_folddisco_Folddisco_prefilter.tsv
query/M-CSA/single/M0832.txt	e_coli_filtered_folddisco	12	--covered-node-ratio 0.75 --rmsd 2.0	Folddisco	0.017	0	result/M0832_e_coli_filtered_folddisco_Folddisco.tsv
query/M-CSA/single/M0832.txt	e_coli_filtered_folddisco	12	--covered-node-ratio 0.75 --skip-match	Folddisco_prefilter	0.011	0	result/M0832_e_coli_filtered_folddisco_Folddisco_prefilter.tsv
query/M-CSA/single/M0833.txt	e_coli_filtered_folddisco	12	--covered-node-ratio 0.75 --rmsd 2.0	Folddisco	0.032	12	result/M0833_e_coli_filtered_folddisco_Folddisco.tsv
query/M-CSA/single/M0833.txt	e_coli_filtered_folddisco	12	--covered-node-ratio 0.75 --skip-match	Folddisco_prefilter	0.014	7	result/M0833_e_coli_filtered_folddisco_Folddisco_prefilter.tsv
query/M-CSA/single/M0835.txt	e_coli_filtered_folddisco	12	--covered-node-ratio 0.75 --rmsd 2.0	Folddisco	0.017	0	result/M0835_e_coli_filtered_folddisco_Folddisco.tsv
query/M-CSA/single/M0835.txt	e_coli_filtered_folddisco	12	--covered-node-ratio 0.75 --skip-match	Folddisco_prefilter	0.015	0	result/M0835_e_coli_filtered_folddisco_Folddisco_prefilter.tsv
query/M-CSA/single/M0837.txt	e_coli_filtered_folddisco	12	--covered-node-ratio 0.75 --rmsd 2.0	Folddisco	0.016	0	result/M0837_e_coli_filtered_folddisco_Folddisco.tsv
query/M-CSA/single/M0837.txt	e_coli_filtered_folddisco	12	--covered-node-ratio 0.75 --skip-match	Folddisco_prefilter	0.011	0	result/M0837_e_coli_filtered_folddisco_Folddisco_prefilter.tsv
query/M-CSA/single/M0839.txt	e_coli_filtered_folddisco	12	--covered-node-ratio 0.75 --rmsd 2.0	Folddisco	0.045	19	result/M0839_e_coli_filtered_folddisco_Folddisco.tsv
query/M-CSA/single/M0839.txt	e_coli_filtered_folddisco	12	--covered-node-ratio 0.75 --skip-match	Folddisco_prefilter	0.012	19	result/M0839_e_coli_filtered_folddisco_Folddisco_prefilter.tsv
query/M-CSA/single/M0840.txt	e_coli_filtered_folddisco	12	--covered-node-ratio 0.75 --rmsd 2.0	Folddisco	0.03	12	result/M0840_e_coli_filtered_folddisco_Folddisco.tsv
query/M-CSA/single/M0840.txt	e_coli_filtered_folddisco	12	--covered-node-ratio 0.75 --skip-match	Folddisco_prefilter	0.016	7	result/M0840_e_coli_filtered_folddisco_Folddisco_prefilter.tsv
query/M-CSA/single/M0841.txt	e_coli_filtered_folddisco	12	--covered-node-ratio 0.75 --rmsd 2.0	Folddisco	0.026	2	result/M0841_e_coli_filtered_folddisco_Folddisco.tsv
query/M-CSA/single/M0841.txt	e_coli_filtered_folddisco	12	--covered-node-ratio 0.75 --skip-match	Folddisco_prefilter	0.012	1	result/M0841_e_coli_filtered_folddisco_Folddisco_prefilter.tsv
query/M-CSA/single/M0842.txt	e_coli_filtered_folddisco	12	--covered-node-ratio 0.75 --rmsd 2.0	Folddisco	0.028	1	result/M0842_e_coli_filtered_folddisco_Folddisco.tsv
query/M-CSA/single/M0842.txt	e_coli_filtered_folddisco	12	--covered-node-ratio 0.75 --skip-match	Folddisco_prefilter	0.018	1	result/M0842_e_coli_filtered_folddisco_Folddisco_prefilter.tsv
query/M-CSA/single/M0843.txt	e_coli_filtered_folddisco	12	--covered-node-ratio 0.75 --rmsd 2.0	Folddisco	0.022	1	result/M0843_e_coli_filtered_folddisco_Folddisco.tsv
query/M-CSA/single/M0843.txt	e_coli_filtered_folddisco	12	--covered-node-ratio 0.75 --skip-match	Folddisco_prefilter	0.015	1	result/M0843_e_coli_filtered_folddisco_Folddisco_prefilter.tsv
query/M-CSA/single/M0844.txt	e_coli_filtered_folddisco	12	--covered-node-ratio 0.75 --rmsd 2.0	Folddisco	0.044	18	result/M0844_e_coli_filtered_folddisco_Folddisco.tsv
query/M-CSA/single/M0844.txt	e_coli_filtered_folddisco	12	--covered-node-ratio 0.75 --skip-match	Folddisco_prefilter	0.012	8	result/M0844_e_coli_filtered_folddisco_Folddisco_prefilter.tsv
query/M-CSA/single/M0845.txt	e_coli_filtered_folddisco	12	--covered-node-ratio 0.75 --rmsd 2.0	Folddisco	0.022	0	result/M0845_e_coli_filtered_folddisco_Folddisco.tsv
query/M-CSA/single/M0845.txt	e_coli_filtered_folddisco	12	--covered-node-ratio 0.75 --skip-match	Folddisco_prefilter	0.017	0	result/M0845_e_coli_filtered_folddisco_Folddisco_prefilter.tsv
query/M-CSA/single/M0846.txt	e_coli_filtered_folddisco	12	--covered-node-ratio 0.75 --rmsd 2.0	Folddisco	0.027	10	result/M0846_e_coli_filtered_folddisco_Folddisco.tsv
query/M-CSA/single/M0846.txt	e_coli_filtered_folddisco	12	--covered-node-ratio 0.75 --skip-match	Folddisco_prefilter	0.012	6	result/M0846_e_coli_filtered_folddisco_Folddisco_prefilter.tsv
query/M-CSA/single/M0847.txt	e_coli_filtered_folddisco	12	--covered-node-ratio 0.75 --rmsd 2.0	Folddisco	0.036	0	result/M0847_e_coli_filtered_folddisco_Folddisco.tsv
query/M-CSA/single/M0847.txt	e_coli_filtered_folddisco	12	--covered-node-ratio 0.75 --skip-match	Folddisco_prefilter	0.018	1	result/M0847_e_coli_filtered_folddisco_Folddisco_prefilter.tsv
query/M-CSA/single/M0848.txt	e_coli_filtered_folddisco	12	--covered-node-ratio 0.75 --rmsd 2.0	Folddisco	0.039	9	result/M0848_e_coli_filtered_folddisco_Folddisco.tsv
query/M-CSA/single/M0848.txt	e_coli_filtered_folddisco	12	--covered-node-ratio 0.75 --skip-match	Folddisco_prefilter	0.015	3	result/M0848_e_coli_filtered_folddisco_Folddisco_prefilter.tsv
query/M-CSA/single/M0849.txt	e_coli_filtered_folddisco	12	--covered-node-ratio 0.75 --rmsd 2.0	Folddisco	0.024	0	result/M0849_e_coli_filtered_folddisco_Folddisco.tsv
query/M-CSA/single/M0849.txt	e_coli_filtered_folddisco	12	--covered-node-ratio 0.75 --skip-match	Folddisco_prefilter	0.014	1	result/M0849_e_coli_filtered_folddisco_Folddisco_prefilter.tsv
query/M-CSA/single/M0850.txt	e_coli_filtered_folddisco	12	--covered-node-ratio 0.75 --rmsd 2.0	Folddisco	0.015	0	result/M0850_e_coli_filtered_folddisco_Folddisco.tsv
query/M-CSA/single/M0850.txt	e_coli_filtered_folddisco	12	--covered-node-ratio 0.75 --skip-match	Folddisco_prefilter	0.012	0	result/M0850_e_coli_filtered_folddisco_Folddisco_prefilter.tsv
query/M-CSA/single/M0851.txt	e_coli_filtered_folddisco	12	--covered-node-ratio 0.75 --rmsd 2.0	Folddisco	0.013	0	result/M0851_e_coli_filtered_folddisco_Folddisco.tsv
query/M-CSA/single/M0851.txt	e_coli_filtered_folddisco	12	--covered-node-ratio 0.75 --skip-match	Folddisco_prefilter	0.011	0	result/M0851_e_coli_filtered_folddisco_Folddisco_prefilter.tsv
query/M-CSA/single/M0852.txt	e_coli_filtered_folddisco	12	--covered-node-ratio 0.75 --rmsd 2.0	Folddisco	0.044	19	result/M0852_e_coli_filtered_folddisco_Folddisco.tsv
query/M-CSA/single/M0852.txt	e_coli_filtered_folddisco	12	--covered-node-ratio 0.75 --skip-match	Folddisco_prefilter	0.013	9	result/M0852_e_coli_filtered_folddisco_Folddisco_prefilter.tsv
query/M-CSA/single/M0853.txt	e_coli_filtered_folddisco	12	--covered-node-ratio 0.75 --rmsd 2.0	Folddisco	0.045	6	result/M0853_e_coli_filtered_folddisco_Folddisco.tsv
query/M-CSA/single/M0853.txt	e_coli_filtered_folddisco	12	--covered-node-ratio 0.75 --skip-match	Folddisco_prefilter	0.016	5	result/M0853_e_coli_filtered_folddisco_Folddisco_prefilter.tsv
query/M-CSA/single/M0854.txt	e_coli_filtered_folddisco	12	--covered-node-ratio 0.75 --rmsd 2.0	Folddisco	0.043	10	result/M0854_e_coli_filtered_folddisco_Folddisco.tsv
query/M-CSA/single/M0854.txt	e_coli_filtered_folddisco	12	--covered-node-ratio 0.75 --skip-match	Folddisco_prefilter	0.017	8	result/M0854_e_coli_filtered_folddisco_Folddisco_prefilter.tsv
query/M-CSA/single/M0855.txt	e_coli_filtered_folddisco	12	--covered-node-ratio 0.75 --rmsd 2.0	Folddisco	0.032	6	result/M0855_e_coli_filtered_folddisco_Folddisco.tsv
query/M-CSA/single/M0855.txt	e_coli_filtered_folddisco	12	--covered-node-ratio 0.75 --skip-match	Folddisco_prefilter	0.012	4	result/M0855_e_coli_filtered_folddisco_Folddisco_prefilter.tsv
query/M-CSA/single/M0857.txt	e_coli_filtered_folddisco	12	--covered-node-ratio 0.75 --rmsd 2.0	Folddisco	0.059	35	result/M0857_e_coli_filtered_folddisco_Folddisco.tsv
query/M-CSA/single/M0857.txt	e_coli_filtered_folddisco	12	--covered-node-ratio 0.75 --skip-match	Folddisco_prefilter	0.014	25	result/M0857_e_coli_filtered_folddisco_Folddisco_prefilter.tsv
query/M-CSA/single/M0858.txt	e_coli_filtered_folddisco	12	--covered-node-ratio 0.75 --rmsd 2.0	Folddisco	0.022	8	result/M0858_e_coli_filtered_folddisco_Folddisco.tsv
query/M-CSA/single/M0858.txt	e_coli_filtered_folddisco	12	--covered-node-ratio 0.75 --skip-match	Folddisco_prefilter	0.011	8	result/M0858_e_coli_filtered_folddisco_Folddisco_prefilter.tsv
query/M-CSA/single/M0859.txt	e_coli_filtered_folddisco	12	--covered-node-ratio 0.75 --rmsd 2.0	Folddisco	0.015	1	result/M0859_e_coli_filtered_folddisco_Folddisco.tsv
query/M-CSA/single/M0859.txt	e_coli_filtered_folddisco	12	--covered-node-ratio 0.75 --skip-match	Folddisco_prefilter	0.015	1	result/M0859_e_coli_filtered_folddisco_Folddisco_prefilter.tsv
query/M-CSA/single/M0860.txt	e_coli_filtered_folddisco	12	--covered-node-ratio 0.75 --rmsd 2.0	Folddisco	0.037	9	result/M0860_e_coli_filtered_folddisco_Folddisco.tsv
query/M-CSA/single/M0860.txt	e_coli_filtered_folddisco	12	--covered-node-ratio 0.75 --skip-match	Folddisco_prefilter	0.02	7	result/M0860_e_coli_filtered_folddisco_Folddisco_prefilter.tsv
query/M-CSA/single/M0862.txt	e_coli_filtered_folddisco	12	--covered-node-ratio 0.75 --rmsd 2.0	Folddisco	0.036	8	result/M0862_e_coli_filtered_folddisco_Folddisco.tsv
query/M-CSA/single/M0862.txt	e_coli_filtered_folddisco	12	--covered-node-ratio 0.75 --skip-match	Folddisco_prefilter	0.013	6	result/M0862_e_coli_filtered_folddisco_Folddisco_prefilter.tsv
query/M-CSA/single/M0863.txt	e_coli_filtered_folddisco	12	--covered-node-ratio 0.75 --rmsd 2.0	Folddisco	0.02	0	result/M0863_e_coli_filtered_folddisco_Folddisco.tsv
query/M-CSA/single/M0863.txt	e_coli_filtered_folddisco	12	--covered-node-ratio 0.75 --skip-match	Folddisco_prefilter	0.015	0	result/M0863_e_coli_filtered_folddisco_Folddisco_prefilter.tsv
query/M-CSA/single/M0864.txt	e_coli_filtered_folddisco	12	--covered-node-ratio 0.75 --rmsd 2.0	Folddisco	0.048	6	result/M0864_e_coli_filtered_folddisco_Folddisco.tsv
query/M-CSA/single/M0864.txt	e_coli_filtered_folddisco	12	--covered-node-ratio 0.75 --skip-match	Folddisco_prefilter	0.021	3	result/M0864_e_coli_filtered_folddisco_Folddisco_prefilter.tsv
query/M-CSA/single/M0865.txt	e_coli_filtered_folddisco	12	--covered-node-ratio 0.75 --rmsd 2.0	Folddisco	0.042	46	result/M0865_e_coli_filtered_folddisco_Folddisco.tsv
query/M-CSA/single/M0865.txt	e_coli_filtered_folddisco	12	--covered-node-ratio 0.75 --skip-match	Folddisco_prefilter	0.014	46	result/M0865_e_coli_filtered_folddisco_Folddisco_prefilter.tsv
query/M-CSA/single/M0866.txt	e_coli_filtered_folddisco	12	--covered-node-ratio 0.75 --rmsd 2.0	Folddisco	0.025	4	result/M0866_e_coli_filtered_folddisco_Folddisco.tsv
query/M-CSA/single/M0866.txt	e_coli_filtered_folddisco	12	--covered-node-ratio 0.75 --skip-match	Folddisco_prefilter	0.013	4	result/M0866_e_coli_filtered_folddisco_Folddisco_prefilter.tsv
query/M-CSA/single/M0867.txt	e_coli_filtered_folddisco	12	--covered-node-ratio 0.75 --rmsd 2.0	Folddisco	0.025	8	result/M0867_e_coli_filtered_folddisco_Folddisco.tsv
query/M-CSA/single/M0867.txt	e_coli_filtered_folddisco	12	--covered-node-ratio 0.75 --skip-match	Folddisco_prefilter	0.016	8	result/M0867_e_coli_filtered_folddisco_Folddisco_prefilter.tsv
query/M-CSA/single/M0868.txt	e_coli_filtered_folddisco	12	--covered-node-ratio 0.75 --rmsd 2.0	Folddisco	0.052	31	result/M0868_e_coli_filtered_folddisco_Folddisco.tsv
query/M-CSA/single/M0868.txt	e_coli_filtered_folddisco	12	--covered-node-ratio 0.75 --skip-match	Folddisco_prefilter	0.023	31	result/M0868_e_coli_filtered_folddisco_Folddisco_prefilter.tsv
query/M-CSA/single/M0869.txt	e_coli_filtered_folddisco	12	--covered-node-ratio 0.75 --rmsd 2.0	Folddisco	0.034	13	result/M0869_e_coli_filtered_folddisco_Folddisco.tsv
query/M-CSA/single/M0869.txt	e_coli_filtered_folddisco	12	--covered-node-ratio 0.75 --skip-match	Folddisco_prefilter	0.012	9	result/M0869_e_coli_filtered_folddisco_Folddisco_prefilter.tsv
query/M-CSA/single/M0870.txt	e_coli_filtered_folddisco	12	--covered-node-ratio 0.75 --rmsd 2.0	Folddisco	0.044	19	result/M0870_e_coli_filtered_folddisco_Folddisco.tsv
query/M-CSA/single/M0870.txt	e_coli_filtered_folddisco	12	--covered-node-ratio 0.75 --skip-match	Folddisco_prefilter	0.013	13	result/M0870_e_coli_filtered_folddisco_Folddisco_prefilter.tsv
query/M-CSA/single/M0871.txt	e_coli_filtered_folddisco	12	--covered-node-ratio 0.75 --rmsd 2.0	Folddisco	0.016	0	result/M0871_e_coli_filtered_folddisco_Folddisco.tsv
query/M-CSA/single/M0871.txt	e_coli_filtered_folddisco	12	--covered-node-ratio 0.75 --skip-match	Folddisco_prefilter	0.015	0	result/M0871_e_coli_filtered_folddisco_Folddisco_prefilter.tsv
query/M-CSA/single/M0872.txt	e_coli_filtered_folddisco	12	--covered-node-ratio 0.75 --rmsd 2.0	Folddisco	0.016	0	result/M0872_e_coli_filtered_folddisco_Folddisco.tsv
query/M-CSA/single/M0872.txt	e_coli_filtered_folddisco	12	--covered-node-ratio 0.75 --skip-match	Folddisco_prefilter	0.012	0	result/M0872_e_coli_filtered_folddisco_Folddisco_prefilter.tsv
query/M-CSA/single/M0873.txt	e_coli_filtered_folddisco	12	--covered-node-ratio 0.75 --rmsd 2.0	Folddisco	0.035	10	result/M0873_e_coli_filtered_folddisco_Folddisco.tsv
query/M-CSA/single/M0873.txt	e_coli_filtered_folddisco	12	--covered-node-ratio 0.75 --skip-match	Folddisco_prefilter	0.012	10	result/M0873_e_coli_filtered_folddisco_Folddisco_prefilter.tsv
query/M-CSA/single/M0874.txt	e_coli_filtered_folddisco	12	--covered-node-ratio 0.75 --rmsd 2.0	Folddisco	0.025	8	result/M0874_e_coli_filtered_folddisco_Folddisco.tsv
query/M-CSA/single/M0874.txt	e_coli_filtered_folddisco	12	--covered-node-ratio 0.75 --skip-match	Folddisco_prefilter	0.012	4	result/M0874_e_coli_filtered_folddisco_Folddisco_prefilter.tsv
query/M-CSA/single/M0875.txt	e_coli_filtered_folddisco	12	--covered-node-ratio 0.75 --rmsd 2.0	Folddisco	0.029	8	result/M0875_e_coli_filtered_folddisco_Folddisco.tsv
query/M-CSA/single/M0875.txt	e_coli_filtered_folddisco	12	--covered-node-ratio 0.75 --skip-match	Folddisco_prefilter	0.013	4	result/M0875_e_coli_filtered_folddisco_Folddisco_prefilter.tsv
query/M-CSA/single/M0876.txt	e_coli_filtered_folddisco	12	--covered-node-ratio 0.75 --rmsd 2.0	Folddisco	0.037	26	result/M0876_e_coli_filtered_folddisco_Folddisco.tsv
query/M-CSA/single/M0876.txt	e_coli_filtered_folddisco	12	--covered-node-ratio 0.75 --skip-match	Folddisco_prefilter	0.016	13	result/M0876_e_coli_filtered_folddisco_Folddisco_prefilter.tsv
query/M-CSA/single/M0877.txt	e_coli_filtered_folddisco	12	--covered-node-ratio 0.75 --rmsd 2.0	Folddisco	0.036	13	result/M0877_e_coli_filtered_folddisco_Folddisco.tsv
query/M-CSA/single/M0877.txt	e_coli_filtered_folddisco	12	--covered-node-ratio 0.75 --skip-match	Folddisco_prefilter	0.015	13	result/M0877_e_coli_filtered_folddisco_Folddisco_prefilter.tsv
query/M-CSA/single/M0878.txt	e_coli_filtered_folddisco	12	--covered-node-ratio 0.75 --rmsd 2.0	Folddisco	0.032	4	result/M0878_e_coli_filtered_folddisco_Folddisco.tsv
query/M-CSA/single/M0878.txt	e_coli_filtered_folddisco	12	--covered-node-ratio 0.75 --skip-match	Folddisco_prefilter	0.012	3	result/M0878_e_coli_filtered_folddisco_Folddisco_prefilter.tsv
query/M-CSA/single/M0879.txt	e_coli_filtered_folddisco	12	--covered-node-ratio 0.75 --rmsd 2.0	Folddisco	0.018	0	result/M0879_e_coli_filtered_folddisco_Folddisco.tsv
query/M-CSA/single/M0879.txt	e_coli_filtered_folddisco	12	--covered-node-ratio 0.75 --skip-match	Folddisco_prefilter	0.013	0	result/M0879_e_coli_filtered_folddisco_Folddisco_prefilter.tsv
query/M-CSA/single/M0880.txt	e_coli_filtered_folddisco	12	--covered-node-ratio 0.75 --rmsd 2.0	Folddisco	0.054	27	result/M0880_e_coli_filtered_folddisco_Folddisco.tsv
query/M-CSA/single/M0880.txt	e_coli_filtered_folddisco	12	--covered-node-ratio 0.75 --skip-match	Folddisco_prefilter	0.016	11	result/M0880_e_coli_filtered_folddisco_Folddisco_prefilter.tsv
query/M-CSA/single/M0881.txt	e_coli_filtered_folddisco	12	--covered-node-ratio 0.75 --rmsd 2.0	Folddisco	0.019	1	result/M0881_e_coli_filtered_folddisco_Folddisco.tsv
query/M-CSA/single/M0881.txt	e_coli_filtered_folddisco	12	--covered-node-ratio 0.75 --skip-match	Folddisco_prefilter	0.012	1	result/M0881_e_coli_filtered_folddisco_Folddisco_prefilter.tsv
query/M-CSA/single/M0882.txt	e_coli_filtered_folddisco	12	--covered-node-ratio 0.75 --rmsd 2.0	Folddisco	0.027	13	result/M0882_e_coli_filtered_folddisco_Folddisco.tsv
query/M-CSA/single/M0882.txt	e_coli_filtered_folddisco	12	--covered-node-ratio 0.75 --skip-match	Folddisco_prefilter	0.012	13	result/M0882_e_coli_filtered_folddisco_Folddisco_prefilter.tsv
query/M-CSA/single/M0883.txt	e_coli_filtered_folddisco	12	--covered-node-ratio 0.75 --rmsd 2.0	Folddisco	0.084	8	result/M0883_e_coli_filtered_folddisco_Folddisco.tsv
query/M-CSA/single/M0883.txt	e_coli_filtered_folddisco	12	--covered-node-ratio 0.75 --skip-match	Folddisco_prefilter	0.014	21	result/M0883_e_coli_filtered_folddisco_Folddisco_prefilter.tsv
query/M-CSA/single/M0884.txt	e_coli_filtered_folddisco	12	--covered-node-ratio 0.75 --rmsd 2.0	Folddisco	0.034	7	result/M0884_e_coli_filtered_folddisco_Folddisco.tsv
query/M-CSA/single/M0884.txt	e_coli_filtered_folddisco	12	--covered-node-ratio 0.75 --skip-match	Folddisco_prefilter	0.019	6	result/M0884_e_coli_filtered_folddisco_Folddisco_prefilter.tsv
query/M-CSA/single/M0885.txt	e_coli_filtered_folddisco	12	--covered-node-ratio 0.75 --rmsd 2.0	Folddisco	0.04	0	result/M0885_e_coli_filtered_folddisco_Folddisco.tsv
query/M-CSA/single/M0885.txt	e_coli_filtered_folddisco	12	--covered-node-ratio 0.75 --skip-match	Folddisco_prefilter	0.015	2	result/M0885_e_coli_filtered_folddisco_Folddisco_prefilter.tsv
query/M-CSA/single/M0886.txt	e_coli_filtered_folddisco	12	--covered-node-ratio 0.75 --rmsd 2.0	Folddisco	0.063	88	result/M0886_e_coli_filtered_folddisco_Folddisco.tsv
query/M-CSA/single/M0886.txt	e_coli_filtered_folddisco	12	--covered-node-ratio 0.75 --skip-match	Folddisco_prefilter	0.012	87	result/M0886_e_coli_filtered_folddisco_Folddisco_prefilter.tsv
query/M-CSA/single/M0888.txt	e_coli_filtered_folddisco	12	--covered-node-ratio 0.75 --rmsd 2.0	Folddisco	0.039	36	result/M0888_e_coli_filtered_folddisco_Folddisco.tsv
query/M-CSA/single/M0888.txt	e_coli_filtered_folddisco	12	--covered-node-ratio 0.75 --skip-match	Folddisco_prefilter	0.012	36	result/M0888_e_coli_filtered_folddisco_Folddisco_prefilter.tsv
query/M-CSA/single/M0889.txt	e_coli_filtered_folddisco	12	--covered-node-ratio 0.75 --rmsd 2.0	Folddisco	0.076	190	result/M0889_e_coli_filtered_folddisco_Folddisco.tsv
query/M-CSA/single/M0889.txt	e_coli_filtered_folddisco	12	--covered-node-ratio 0.75 --skip-match	Folddisco_prefilter	0.017	78	result/M0889_e_coli_filtered_folddisco_Folddisco_prefilter.tsv
query/M-CSA/single/M0890.txt	e_coli_filtered_folddisco	12	--covered-node-ratio 0.75 --rmsd 2.0	Folddisco	0.025	0	result/M0890_e_coli_filtered_folddisco_Folddisco.tsv
query/M-CSA/single/M0890.txt	e_coli_filtered_folddisco	12	--covered-node-ratio 0.75 --skip-match	Folddisco_prefilter	0.022	0	result/M0890_e_coli_filtered_folddisco_Folddisco_prefilter.tsv
query/M-CSA/single/M0891.txt	e_coli_filtered_folddisco	12	--covered-node-ratio 0.75 --rmsd 2.0	Folddisco	0.046	23	result/M0891_e_coli_filtered_folddisco_Folddisco.tsv
query/M-CSA/single/M0891.txt	e_coli_filtered_folddisco	12	--covered-node-ratio 0.75 --skip-match	Folddisco_prefilter	0.014	25	result/M0891_e_coli_filtered_folddisco_Folddisco_prefilter.tsv
query/M-CSA/single/M0892.txt	e_coli_filtered_folddisco	12	--covered-node-ratio 0.75 --rmsd 2.0	Folddisco	0.034	15	result/M0892_e_coli_filtered_folddisco_Folddisco.tsv
query/M-CSA/single/M0892.txt	e_coli_filtered_folddisco	12	--covered-node-ratio 0.75 --skip-match	Folddisco_prefilter	0.014	15	result/M0892_e_coli_filtered_folddisco_Folddisco_prefilter.tsv
query/M-CSA/single/M0895.txt	e_coli_filtered_folddisco	12	--covered-node-ratio 0.75 --rmsd 2.0	Folddisco	0.018	2	result/M0895_e_coli_filtered_folddisco_Folddisco.tsv
query/M-CSA/single/M0895.txt	e_coli_filtered_folddisco	12	--covered-node-ratio 0.75 --skip-match	Folddisco_prefilter	0.012	1	result/M0895_e_coli_filtered_folddisco_Folddisco_prefilter.tsv
query/M-CSA/single/M0896.txt	e_coli_filtered_folddisco	12	--covered-node-ratio 0.75 --rmsd 2.0	Folddisco	0.063	11	result/M0896_e_coli_filtered_folddisco_Folddisco.tsv
query/M-CSA/single/M0896.txt	e_coli_filtered_folddisco	12	--covered-node-ratio 0.75 --skip-match	Folddisco_prefilter	0.014	20	result/M0896_e_coli_filtered_folddisco_Folddisco_prefilter.tsv
query/M-CSA/single/M0897.txt	e_coli_filtered_folddisco	12	--covered-node-ratio 0.75 --rmsd 2.0	Folddisco	0.017	0	result/M0897_e_coli_filtered_folddisco_Folddisco.tsv
query/M-CSA/single/M0897.txt	e_coli_filtered_folddisco	12	--covered-node-ratio 0.75 --skip-match	Folddisco_prefilter	0.012	0	result/M0897_e_coli_filtered_folddisco_Folddisco_prefilter.tsv
query/M-CSA/single/M0898.txt	e_coli_filtered_folddisco	12	--covered-node-ratio 0.75 --rmsd 2.0	Folddisco	0.027	5	result/M0898_e_coli_filtered_folddisco_Folddisco.tsv
query/M-CSA/single/M0898.txt	e_coli_filtered_folddisco	12	--covered-node-ratio 0.75 --skip-match	Folddisco_prefilter	0.011	3	result/M0898_e_coli_filtered_folddisco_Folddisco_prefilter.tsv
query/M-CSA/single/M0899.txt	e_coli_filtered_folddisco	12	--covered-node-ratio 0.75 --rmsd 2.0	Folddisco	0.041	6	result/M0899_e_coli_filtered_folddisco_Folddisco.tsv
query/M-CSA/single/M0899.txt	e_coli_filtered_folddisco	12	--covered-node-ratio 0.75 --skip-match	Folddisco_prefilter	0.018	6	result/M0899_e_coli_filtered_folddisco_Folddisco_prefilter.tsv
query/M-CSA/single/M0900.txt	e_coli_filtered_folddisco	12	--covered-node-ratio 0.75 --rmsd 2.0	Folddisco	0.017	0	result/M0900_e_coli_filtered_folddisco_Folddisco.tsv
query/M-CSA/single/M0900.txt	e_coli_filtered_folddisco	12	--covered-node-ratio 0.75 --skip-match	Folddisco_prefilter	0.013	0	result/M0900_e_coli_filtered_folddisco_Folddisco_prefilter.tsv
query/M-CSA/single/M0901.txt	e_coli_filtered_folddisco	12	--covered-node-ratio 0.75 --rmsd 2.0	Folddisco	0.029	4	result/M0901_e_coli_filtered_folddisco_Folddisco.tsv
query/M-CSA/single/M0901.txt	e_coli_filtered_folddisco	12	--covered-node-ratio 0.75 --skip-match	Folddisco_prefilter	0.015	7	result/M0901_e_coli_filtered_folddisco_Folddisco_prefilter.tsv
query/M-CSA/single/M0902.txt	e_coli_filtered_folddisco	12	--covered-node-ratio 0.75 --rmsd 2.0	Folddisco	0.031	4	result/M0902_e_coli_filtered_folddisco_Folddisco.tsv
query/M-CSA/single/M0902.txt	e_coli_filtered_folddisco	12	--covered-node-ratio 0.75 --skip-match	Folddisco_prefilter	0.015	2	result/M0902_e_coli_filtered_folddisco_Folddisco_prefilter.tsv
query/M-CSA/single/M0903.txt	e_coli_filtered_folddisco	12	--covered-node-ratio 0.75 --rmsd 2.0	Folddisco	0.022	0	result/M0903_e_coli_filtered_folddisco_Folddisco.tsv
query/M-CSA/single/M0903.txt	e_coli_filtered_folddisco	12	--covered-node-ratio 0.75 --skip-match	Folddisco_prefilter	0.017	0	result/M0903_e_coli_filtered_folddisco_Folddisco_prefilter.tsv
query/M-CSA/single/M0904.txt	e_coli_filtered_folddisco	12	--covered-node-ratio 0.75 --rmsd 2.0	Folddisco	0.067	11	result/M0904_e_coli_filtered_folddisco_Folddisco.tsv
query/M-CSA/single/M0904.txt	e_coli_filtered_folddisco	12	--covered-node-ratio 0.75 --skip-match	Folddisco_prefilter	0.016	10	result/M0904_e_coli_filtered_folddisco_Folddisco_prefilter.tsv
query/M-CSA/single/M0905.txt	e_coli_filtered_folddisco	12	--covered-node-ratio 0.75 --rmsd 2.0	Folddisco	0.023	1	result/M0905_e_coli_filtered_folddisco_Folddisco.tsv
query/M-CSA/single/M0905.txt	e_coli_filtered_folddisco	12	--covered-node-ratio 0.75 --skip-match	Folddisco_prefilter	0.012	1	result/M0905_e_coli_filtered_folddisco_Folddisco_prefilter.tsv
query/M-CSA/single/M0906.txt	e_coli_filtered_folddisco	12	--covered-node-ratio 0.75 --rmsd 2.0	Folddisco	0.058	132	result/M0906_e_coli_filtered_folddisco_Folddisco.tsv
query/M-CSA/single/M0906.txt	e_coli_filtered_folddisco	12	--covered-node-ratio 0.75 --skip-match	Folddisco_prefilter	0.013	88	result/M0906_e_coli_filtered_folddisco_Folddisco_prefilter.tsv
query/M-CSA/single/M0907.txt	e_coli_filtered_folddisco	12	--covered-node-ratio 0.75 --rmsd 2.0	Folddisco	0.065	10	result/M0907_e_coli_filtered_folddisco_Folddisco.tsv
query/M-CSA/single/M0907.txt	e_coli_filtered_folddisco	12	--covered-node-ratio 0.75 --skip-match	Folddisco_prefilter	0.037	7	result/M0907_e_coli_filtered_folddisco_Folddisco_prefilter.tsv
query/M-CSA/single/M0908.txt	e_coli_filtered_folddisco	12	--covered-node-ratio 0.75 --rmsd 2.0	Folddisco	0.042	19	result/M0908_e_coli_filtered_folddisco_Folddisco.tsv
query/M-CSA/single/M0908.txt	e_coli_filtered_folddisco	12	--covered-node-ratio 0.75 --skip-match	Folddisco_prefilter	0.011	11	result/M0908_e_coli_filtered_folddisco_Folddisco_prefilter.tsv
query/M-CSA/single/M0910.txt	e_coli_filtered_folddisco	12	--covered-node-ratio 0.75 --rmsd 2.0	Folddisco	0.038	18	result/M0910_e_coli_filtered_folddisco_Folddisco.tsv
query/M-CSA/single/M0910.txt	e_coli_filtered_folddisco	12	--covered-node-ratio 0.75 --skip-match	Folddisco_prefilter	0.012	13	result/M0910_e_coli_filtered_folddisco_Folddisco_prefilter.tsv
query/M-CSA/single/M0911.txt	e_coli_filtered_folddisco	12	--covered-node-ratio 0.75 --rmsd 2.0	Folddisco	0.017	0	result/M0911_e_coli_filtered_folddisco_Folddisco.tsv
query/M-CSA/single/M0911.txt	e_coli_filtered_folddisco	12	--covered-node-ratio 0.75 --skip-match	Folddisco_prefilter	0.017	0	result/M0911_e_coli_filtered_folddisco_Folddisco_prefilter.tsv
query/M-CSA/single/M0912.txt	e_coli_filtered_folddisco	12	--covered-node-ratio 0.75 --rmsd 2.0	Folddisco	0.042	7	result/M0912_e_coli_filtered_folddisco_Folddisco.tsv
query/M-CSA/single/M0912.txt	e_coli_filtered_folddisco	12	--covered-node-ratio 0.75 --skip-match	Folddisco_prefilter	0.02	4	result/M0912_e_coli_filtered_folddisco_Folddisco_prefilter.tsv
query/M-CSA/single/M0913.txt	e_coli_filtered_folddisco	12	--covered-node-ratio 0.75 --rmsd 2.0	Folddisco	0.041	23	result/M0913_e_coli_filtered_folddisco_Folddisco.tsv
query/M-CSA/single/M0913.txt	e_coli_filtered_folddisco	12	--covered-node-ratio 0.75 --skip-match	Folddisco_prefilter	0.013	23	result/M0913_e_coli_filtered_folddisco_Folddisco_prefilter.tsv
query/M-CSA/single/M0914.txt	e_coli_filtered_folddisco	12	--covered-node-ratio 0.75 --rmsd 2.0	Folddisco	0.022	0	result/M0914_e_coli_filtered_folddisco_Folddisco.tsv
query/M-CSA/single/M0914.txt	e_coli_filtered_folddisco	12	--covered-node-ratio 0.75 --skip-match	Folddisco_prefilter	0.015	2	result/M0914_e_coli_filtered_folddisco_Folddisco_prefilter.tsv
query/M-CSA/single/M0915.txt	e_coli_filtered_folddisco	12	--covered-node-ratio 0.75 --rmsd 2.0	Folddisco	0.076	45	result/M0915_e_coli_filtered_folddisco_Folddisco.tsv
query/M-CSA/single/M0915.txt	e_coli_filtered_folddisco	12	--covered-node-ratio 0.75 --skip-match	Folddisco_prefilter	0.015	25	result/M0915_e_coli_filtered_folddisco_Folddisco_prefilter.tsv
query/M-CSA/single/M0916.txt	e_coli_filtered_folddisco	12	--covered-node-ratio 0.75 --rmsd 2.0	Folddisco	0.017	0	result/M0916_e_coli_filtered_folddisco_Folddisco.tsv
query/M-CSA/single/M0916.txt	e_coli_filtered_folddisco	12	--covered-node-ratio 0.75 --skip-match	Folddisco_prefilter	0.013	0	result/M0916_e_coli_filtered_folddisco_Folddisco_prefilter.tsv
query/M-CSA/single/M0917.txt	e_coli_filtered_folddisco	12	--covered-node-ratio 0.75 --rmsd 2.0	Folddisco	0.037	16	result/M0917_e_coli_filtered_folddisco_Folddisco.tsv
query/M-CSA/single/M0917.txt	e_coli_filtered_folddisco	12	--covered-node-ratio 0.75 --skip-match	Folddisco_prefilter	0.014	10	result/M0917_e_coli_filtered_folddisco_Folddisco_prefilter.tsv
query/M-CSA/single/M0918.txt	e_coli_filtered_folddisco	12	--covered-node-ratio 0.75 --rmsd 2.0	Folddisco	0.048	1	result/M0918_e_coli_filtered_folddisco_Folddisco.tsv
query/M-CSA/single/M0918.txt	e_coli_filtered_folddisco	12	--covered-node-ratio 0.75 --skip-match	Folddisco_prefilter	0.033	1	result/M0918_e_coli_filtered_folddisco_Folddisco_prefilter.tsv
query/M-CSA/single/M0919.txt	e_coli_filtered_folddisco	12	--covered-node-ratio 0.75 --rmsd 2.0	Folddisco	0.042	10	result/M0919_e_coli_filtered_folddisco_Folddisco.tsv
query/M-CSA/single/M0919.txt	e_coli_filtered_folddisco	12	--covered-node-ratio 0.75 --skip-match	Folddisco_prefilter	0.016	7	result/M0919_e_coli_filtered_folddisco_Folddisco_prefilter.tsv
query/M-CSA/single/M0920.txt	e_coli_filtered_folddisco	12	--covered-node-ratio 0.75 --rmsd 2.0	Folddisco	0.037	5	result/M0920_e_coli_filtered_folddisco_Folddisco.tsv
query/M-CSA/single/M0920.txt	e_coli_filtered_folddisco	12	--covered-node-ratio 0.75 --skip-match	Folddisco_prefilter	0.018	4	result/M0920_e_coli_filtered_folddisco_Folddisco_prefilter.tsv
query/M-CSA/single/M0921.txt	e_coli_filtered_folddisco	12	--covered-node-ratio 0.75 --rmsd 2.0	Folddisco	0.052	15	result/M0921_e_coli_filtered_folddisco_Folddisco.tsv
query/M-CSA/single/M0921.txt	e_coli_filtered_folddisco	12	--covered-node-ratio 0.75 --skip-match	Folddisco_prefilter	0.011	15	result/M0921_e_coli_filtered_folddisco_Folddisco_prefilter.tsv
query/M-CSA/single/M0922.txt	e_coli_filtered_folddisco	12	--covered-node-ratio 0.75 --rmsd 2.0	Folddisco	0.017	0	result/M0922_e_coli_filtered_folddisco_Folddisco.tsv
query/M-CSA/single/M0922.txt	e_coli_filtered_folddisco	12	--covered-node-ratio 0.75 --skip-match	Folddisco_prefilter	0.014	0	result/M0922_e_coli_filtered_folddisco_Folddisco_prefilter.tsv
query/M-CSA/single/M0923.txt	e_coli_filtered_folddisco	12	--covered-node-ratio 0.75 --rmsd 2.0	Folddisco	0.047	20	result/M0923_e_coli_filtered_folddisco_Folddisco.tsv
query/M-CSA/single/M0923.txt	e_coli_filtered_folddisco	12	--covered-node-ratio 0.75 --skip-match	Folddisco_prefilter	0.011	20	result/M0923_e_coli_filtered_folddisco_Folddisco_prefilter.tsv
query/M-CSA/single/M0924.txt	e_coli_filtered_folddisco	12	--covered-node-ratio 0.75 --rmsd 2.0	Folddisco	0.042	38	result/M0924_e_coli_filtered_folddisco_Folddisco.tsv
query/M-CSA/single/M0924.txt	e_coli_filtered_folddisco	12	--covered-node-ratio 0.75 --skip-match	Folddisco_prefilter	0.011	38	result/M0924_e_coli_filtered_folddisco_Folddisco_prefilter.tsv
query/M-CSA/single/M0925.txt	e_coli_filtered_folddisco	12	--covered-node-ratio 0.75 --rmsd 2.0	Folddisco	0.027	6	result/M0925_e_coli_filtered_folddisco_Folddisco.tsv
query/M-CSA/single/M0925.txt	e_coli_filtered_folddisco	12	--covered-node-ratio 0.75 --skip-match	Folddisco_prefilter	0.015	3	result/M0925_e_coli_filtered_folddisco_Folddisco_prefilter.tsv
query/M-CSA/single/M0926.txt	e_coli_filtered_folddisco	12	--covered-node-ratio 0.75 --rmsd 2.0	Folddisco	0.06	70	result/M0926_e_coli_filtered_folddisco_Folddisco.tsv
query/M-CSA/single/M0926.txt	e_coli_filtered_folddisco	12	--covered-node-ratio 0.75 --skip-match	Folddisco_prefilter	0.013	66	result/M0926_e_coli_filtered_folddisco_Folddisco_prefilter.tsv
query/M-CSA/single/M0927.txt	e_coli_filtered_folddisco	12	--covered-node-ratio 0.75 --rmsd 2.0	Folddisco	0.037	16	result/M0927_e_coli_filtered_folddisco_Folddisco.tsv
query/M-CSA/single/M0927.txt	e_coli_filtered_folddisco	12	--covered-node-ratio 0.75 --skip-match	Folddisco_prefilter	0.017	6	result/M0927_e_coli_filtered_folddisco_Folddisco_prefilter.tsv
query/M-CSA/single/M0928.txt	e_coli_filtered_folddisco	12	--covered-node-ratio 0.75 --rmsd 2.0	Folddisco	0.09	141	result/M0928_e_coli_filtered_folddisco_Folddisco.tsv
query/M-CSA/single/M0928.txt	e_coli_filtered_folddisco	12	--covered-node-ratio 0.75 --skip-match	Folddisco_prefilter	0.016	75	result/M0928_e_coli_filtered_folddisco_Folddisco_prefilter.tsv
query/M-CSA/single/M0929.txt	e_coli_filtered_folddisco	12	--covered-node-ratio 0.75 --rmsd 2.0	Folddisco	0.026	5	result/M0929_e_coli_filtered_folddisco_Folddisco.tsv
query/M-CSA/single/M0929.txt	e_coli_filtered_folddisco	12	--covered-node-ratio 0.75 --skip-match	Folddisco_prefilter	0.017	4	result/M0929_e_coli_filtered_folddisco_Folddisco_prefilter.tsv
query/M-CSA/single/M0931.txt	e_coli_filtered_folddisco	12	--covered-node-ratio 0.75 --rmsd 2.0	Folddisco	0.021	3	result/M0931_e_coli_filtered_folddisco_Folddisco.tsv
query/M-CSA/single/M0931.txt	e_coli_filtered_folddisco	12	--covered-node-ratio 0.75 --skip-match	Folddisco_prefilter	0.011	2	result/M0931_e_coli_filtered_folddisco_Folddisco_prefilter.tsv
query/M-CSA/single/M0932.txt	e_coli_filtered_folddisco	12	--covered-node-ratio 0.75 --rmsd 2.0	Folddisco	0.046	22	result/M0932_e_coli_filtered_folddisco_Folddisco.tsv
query/M-CSA/single/M0932.txt	e_coli_filtered_folddisco	12	--covered-node-ratio 0.75 --skip-match	Folddisco_prefilter	0.013	12	result/M0932_e_coli_filtered_folddisco_Folddisco_prefilter.tsv
query/M-CSA/single/M0933.txt	e_coli_filtered_folddisco	12	--covered-node-ratio 0.75 --rmsd 2.0	Folddisco	0.018	0	result/M0933_e_coli_filtered_folddisco_Folddisco.tsv
query/M-CSA/single/M0933.txt	e_coli_filtered_folddisco	12	--covered-node-ratio 0.75 --skip-match	Folddisco_prefilter	0.018	0	result/M0933_e_coli_filtered_folddisco_Folddisco_prefilter.tsv
query/M-CSA/single/M0934.txt	e_coli_filtered_folddisco	12	--covered-node-ratio 0.75 --rmsd 2.0	Folddisco	0.044	13	result/M0934_e_coli_filtered_folddisco_Folddisco.tsv
query/M-CSA/single/M0934.txt	e_coli_filtered_folddisco	12	--covered-node-ratio 0.75 --skip-match	Folddisco_prefilter	0.014	7	result/M0934_e_coli_filtered_folddisco_Folddisco_prefilter.tsv
query/M-CSA/single/M0935.txt	e_coli_filtered_folddisco	12	--covered-node-ratio 0.75 --rmsd 2.0	Folddisco	0.032	7	result/M0935_e_coli_filtered_folddisco_Folddisco.tsv
query/M-CSA/single/M0935.txt	e_coli_filtered_folddisco	12	--covered-node-ratio 0.75 --skip-match	Folddisco_prefilter	0.015	4	result/M0935_e_coli_filtered_folddisco_Folddisco_prefilter.tsv
query/M-CSA/single/M0936.txt	e_coli_filtered_folddisco	12	--covered-node-ratio 0.75 --rmsd 2.0	Folddisco	0.027	0	result/M0936_e_coli_filtered_folddisco_Folddisco.tsv
query/M-CSA/single/M0936.txt	e_coli_filtered_folddisco	12	--covered-node-ratio 0.75 --skip-match	Folddisco_prefilter	0.02	0	result/M0936_e_coli_filtered_folddisco_Folddisco_prefilter.tsv
query/M-CSA/single/M0937.txt	e_coli_filtered_folddisco	12	--covered-node-ratio 0.75 --rmsd 2.0	Folddisco	0.017	0	result/M0937_e_coli_filtered_folddisco_Folddisco.tsv
query/M-CSA/single/M0937.txt	e_coli_filtered_folddisco	12	--covered-node-ratio 0.75 --skip-match	Folddisco_prefilter	0.012	0	result/M0937_e_coli_filtered_folddisco_Folddisco_prefilter.tsv
query/M-CSA/single/M0938.txt	e_coli_filtered_folddisco	12	--covered-node-ratio 0.75 --rmsd 2.0	Folddisco	0.023	1	result/M0938_e_coli_filtered_folddisco_Folddisco.tsv
query/M-CSA/single/M0938.txt	e_coli_filtered_folddisco	12	--covered-node-ratio 0.75 --skip-match	Folddisco_prefilter	0.016	1	result/M0938_e_coli_filtered_folddisco_Folddisco_prefilter.tsv
query/M-CSA/single/M0939.txt	e_coli_filtered_folddisco	12	--covered-node-ratio 0.75 --rmsd 2.0	Folddisco	0.088	210	result/M0939_e_coli_filtered_folddisco_Folddisco.tsv
query/M-CSA/single/M0939.txt	e_coli_filtered_folddisco	12	--covered-node-ratio 0.75 --skip-match	Folddisco_prefilter	0.023	97	result/M0939_e_coli_filtered_folddisco_Folddisco_prefilter.tsv
query/M-CSA/single/M0940.txt	e_coli_filtered_folddisco	12	--covered-node-ratio 0.75 --rmsd 2.0	Folddisco	0.047	4	result/M0940_e_coli_filtered_folddisco_Folddisco.tsv
query/M-CSA/single/M0940.txt	e_coli_filtered_folddisco	12	--covered-node-ratio 0.75 --skip-match	Folddisco_prefilter	0.026	4	result/M0940_e_coli_filtered_folddisco_Folddisco_prefilter.tsv
query/M-CSA/single/M0941.txt	e_coli_filtered_folddisco	12	--covered-node-ratio 0.75 --rmsd 2.0	Folddisco	0.024	0	result/M0941_e_coli_filtered_folddisco_Folddisco.tsv
query/M-CSA/single/M0941.txt	e_coli_filtered_folddisco	12	--covered-node-ratio 0.75 --skip-match	Folddisco_prefilter	0.017	0	result/M0941_e_coli_filtered_folddisco_Folddisco_prefilter.tsv
query/M-CSA/single/M0942.txt	e_coli_filtered_folddisco	12	--covered-node-ratio 0.75 --rmsd 2.0	Folddisco	0.019	0	result/M0942_e_coli_filtered_folddisco_Folddisco.tsv
query/M-CSA/single/M0942.txt	e_coli_filtered_folddisco	12	--covered-node-ratio 0.75 --skip-match	Folddisco_prefilter	0.015	0	result/M0942_e_coli_filtered_folddisco_Folddisco_prefilter.tsv
query/M-CSA/single/M0943.txt	e_coli_filtered_folddisco	12	--covered-node-ratio 0.75 --rmsd 2.0	Folddisco	0.033	1	result/M0943_e_coli_filtered_folddisco_Folddisco.tsv
query/M-CSA/single/M0943.txt	e_coli_filtered_folddisco	12	--covered-node-ratio 0.75 --skip-match	Folddisco_prefilter	0.016	3	result/M0943_e_coli_filtered_folddisco_Folddisco_prefilter.tsv
query/M-CSA/single/M0944.txt	e_coli_filtered_folddisco	12	--covered-node-ratio 0.75 --rmsd 2.0	Folddisco	0.07	0	result/M0944_e_coli_filtered_folddisco_Folddisco.tsv
query/M-CSA/single/M0944.txt	e_coli_filtered_folddisco	12	--covered-node-ratio 0.75 --skip-match	Folddisco_prefilter	0.018	10	result/M0944_e_coli_filtered_folddisco_Folddisco_prefilter.tsv
query/M-CSA/single/M0946.txt	e_coli_filtered_folddisco	12	--covered-node-ratio 0.75 --rmsd 2.0	Folddisco	0.014	0	result/M0946_e_coli_filtered_folddisco_Folddisco.tsv
query/M-CSA/single/M0946.txt	e_coli_filtered_folddisco	12	--covered-node-ratio 0.75 --skip-match	Folddisco_prefilter	0.009	0	result/M0946_e_coli_filtered_folddisco_Folddisco_prefilter.tsv
query/M-CSA/single/M0947.txt	e_coli_filtered_folddisco	12	--covered-node-ratio 0.75 --rmsd 2.0	Folddisco	0.069	75	result/M0947_e_coli_filtered_folddisco_Folddisco.tsv
query/M-CSA/single/M0947.txt	e_coli_filtered_folddisco	12	--covered-node-ratio 0.75 --skip-match	Folddisco_prefilter	0.018	26	result/M0947_e_coli_filtered_folddisco_Folddisco_prefilter.tsv
query/M-CSA/single/M0948.txt	e_coli_filtered_folddisco	12	--covered-node-ratio 0.75 --rmsd 2.0	Folddisco	0.057	24	result/M0948_e_coli_filtered_folddisco_Folddisco.tsv
query/M-CSA/single/M0948.txt	e_coli_filtered_folddisco	12	--covered-node-ratio 0.75 --skip-match	Folddisco_prefilter	0.015	8	result/M0948_e_coli_filtered_folddisco_Folddisco_prefilter.tsv
query/M-CSA/single/M0949.txt	e_coli_filtered_folddisco	12	--covered-node-ratio 0.75 --rmsd 2.0	Folddisco	0.033	1	result/M0949_e_coli_filtered_folddisco_Folddisco.tsv
query/M-CSA/single/M0949.txt	e_coli_filtered_folddisco	12	--covered-node-ratio 0.75 --skip-match	Folddisco_prefilter	0.032	1	result/M0949_e_coli_filtered_folddisco_Folddisco_prefilter.tsv
query/M-CSA/single/M0951.txt	e_coli_filtered_folddisco	12	--covered-node-ratio 0.75 --rmsd 2.0	Folddisco	0.031	1	result/M0951_e_coli_filtered_folddisco_Folddisco.tsv
query/M-CSA/single/M0951.txt	e_coli_filtered_folddisco	12	--covered-node-ratio 0.75 --skip-match	Folddisco_prefilter	0.019	2	result/M0951_e_coli_filtered_folddisco_Folddisco_prefilter.tsv
query/M-CSA/single/M0952.txt	e_coli_filtered_folddisco	12	--covered-node-ratio 0.75 --rmsd 2.0	Folddisco	0.077	38	result/M0952_e_coli_filtered_folddisco_Folddisco.tsv
query/M-CSA/single/M0952.txt	e_coli_filtered_folddisco	12	--covered-node-ratio 0.75 --skip-match	Folddisco_prefilter	0.014	18	result/M0952_e_coli_filtered_folddisco_Folddisco_prefilter.tsv
query/M-CSA/single/M0953.txt	e_coli_filtered_folddisco	12	--covered-node-ratio 0.75 --rmsd 2.0	Folddisco	0.017	0	result/M0953_e_coli_filtered_folddisco_Folddisco.tsv
query/M-CSA/single/M0953.txt	e_coli_filtered_folddisco	12	--covered-node-ratio 0.75 --skip-match	Folddisco_prefilter	0.013	0	result/M0953_e_coli_filtered_folddisco_Folddisco_prefilter.tsv
query/M-CSA/single/M0954.txt	e_coli_filtered_folddisco	12	--covered-node-ratio 0.75 --rmsd 2.0	Folddisco	0.031	6	result/M0954_e_coli_filtered_folddisco_Folddisco.tsv
query/M-CSA/single/M0954.txt	e_coli_filtered_folddisco	12	--covered-node-ratio 0.75 --skip-match	Folddisco_prefilter	0.017	5	result/M0954_e_coli_filtered_folddisco_Folddisco_prefilter.tsv
query/M-CSA/single/M0955.txt	e_coli_filtered_folddisco	12	--covered-node-ratio 0.75 --rmsd 2.0	Folddisco	0.054	34	result/M0955_e_coli_filtered_folddisco_Folddisco.tsv
query/M-CSA/single/M0955.txt	e_coli_filtered_folddisco	12	--covered-node-ratio 0.75 --skip-match	Folddisco_prefilter	0.018	34	result/M0955_e_coli_filtered_folddisco_Folddisco_prefilter.tsv
query/M-CSA/single/M0956.txt	e_coli_filtered_folddisco	12	--covered-node-ratio 0.75 --rmsd 2.0	Folddisco	0.035	13	result/M0956_e_coli_filtered_folddisco_Folddisco.tsv
query/M-CSA/single/M0956.txt	e_coli_filtered_folddisco	12	--covered-node-ratio 0.75 --skip-match	Folddisco_prefilter	0.013	5	result/M0956_e_coli_filtered_folddisco_Folddisco_prefilter.tsv
query/M-CSA/single/M0957.txt	e_coli_filtered_folddisco	12	--covered-node-ratio 0.75 --rmsd 2.0	Folddisco	0.056	13	result/M0957_e_coli_filtered_folddisco_Folddisco.tsv
query/M-CSA/single/M0957.txt	e_coli_filtered_folddisco	12	--covered-node-ratio 0.75 --skip-match	Folddisco_prefilter	0.025	9	result/M0957_e_coli_filtered_folddisco_Folddisco_prefilter.tsv
query/M-CSA/single/M0958.txt	e_coli_filtered_folddisco	12	--covered-node-ratio 0.75 --rmsd 2.0	Folddisco	0.043	6	result/M0958_e_coli_filtered_folddisco_Folddisco.tsv
query/M-CSA/single/M0958.txt	e_coli_filtered_folddisco	12	--covered-node-ratio 0.75 --skip-match	Folddisco_prefilter	0.013	6	result/M0958_e_coli_filtered_folddisco_Folddisco_prefilter.tsv
query/M-CSA/single/M0959.txt	e_coli_filtered_folddisco	12	--covered-node-ratio 0.75 --rmsd 2.0	Folddisco	0.032	8	result/M0959_e_coli_filtered_folddisco_Folddisco.tsv
query/M-CSA/single/M0959.txt	e_coli_filtered_folddisco	12	--covered-node-ratio 0.75 --skip-match	Folddisco_prefilter	0.012	5	result/M0959_e_coli_filtered_folddisco_Folddisco_prefilter.tsv
query/M-CSA/single/M0960.txt	e_coli_filtered_folddisco	12	--covered-node-ratio 0.75 --rmsd 2.0	Folddisco	0.029	0	result/M0960_e_coli_filtered_folddisco_Folddisco.tsv
query/M-CSA/single/M0960.txt	e_coli_filtered_folddisco	12	--covered-node-ratio 0.75 --skip-match	Folddisco_prefilter	0.019	1	result/M0960_e_coli_filtered_folddisco_Folddisco_prefilter.tsv
query/M-CSA/single/M0961.txt	e_coli_filtered_folddisco	12	--covered-node-ratio 0.75 --rmsd 2.0	Folddisco	0.027	5	result/M0961_e_coli_filtered_folddisco_Folddisco.tsv
query/M-CSA/single/M0961.txt	e_coli_filtered_folddisco	12	--covered-node-ratio 0.75 --skip-match	Folddisco_prefilter	0.013	4	result/M0961_e_coli_filtered_folddisco_Folddisco_prefilter.tsv
query/M-CSA/single/M0962.txt	e_coli_filtered_folddisco	12	--covered-node-ratio 0.75 --rmsd 2.0	Folddisco	0.04	2	result/M0962_e_coli_filtered_folddisco_Folddisco.tsv
query/M-CSA/single/M0962.txt	e_coli_filtered_folddisco	12	--covered-node-ratio 0.75 --skip-match	Folddisco_prefilter	0.022	3	result/M0962_e_coli_filtered_folddisco_Folddisco_prefilter.tsv
query/M-CSA/single/M0963.txt	e_coli_filtered_folddisco	12	--covered-node-ratio 0.75 --rmsd 2.0	Folddisco	0.029	2	result/M0963_e_coli_filtered_folddisco_Folddisco.tsv
query/M-CSA/single/M0963.txt	e_coli_filtered_folddisco	12	--covered-node-ratio 0.75 --skip-match	Folddisco_prefilter	0.025	1	result/M0963_e_coli_filtered_folddisco_Folddisco_prefilter.tsv
query/M-CSA/single/M0964.txt	e_coli_filtered_folddisco	12	--covered-node-ratio 0.75 --rmsd 2.0	Folddisco	0.019	0	result/M0964_e_coli_filtered_folddisco_Folddisco.tsv
query/M-CSA/single/M0964.txt	e_coli_filtered_folddisco	12	--covered-node-ratio 0.75 --skip-match	Folddisco_prefilter	0.015	0	result/M0964_e_coli_filtered_folddisco_Folddisco_prefilter.tsv
query/M-CSA/single/M0965.txt	e_coli_filtered_folddisco	12	--covered-node-ratio 0.75 --rmsd 2.0	Folddisco	0.026	8	result/M0965_e_coli_filtered_folddisco_Folddisco.tsv
query/M-CSA/single/M0965.txt	e_coli_filtered_folddisco	12	--covered-node-ratio 0.75 --skip-match	Folddisco_prefilter	0.014	6	result/M0965_e_coli_filtered_folddisco_Folddisco_prefilter.tsv
query/M-CSA/single/M0966.txt	e_coli_filtered_folddisco	12	--covered-node-ratio 0.75 --rmsd 2.0	Folddisco	0.036	0	result/M0966_e_coli_filtered_folddisco_Folddisco.tsv
query/M-CSA/single/M0966.txt	e_coli_filtered_folddisco	12	--covered-node-ratio 0.75 --skip-match	Folddisco_prefilter	0.033	0	result/M0966_e_coli_filtered_folddisco_Folddisco_prefilter.tsv
query/M-CSA/single/M0001.txt	s_cerevisiae_filtered_folddisco	12	--covered-node-ratio 0.75 --rmsd 2.0	Folddisco	0.047	14	result/M0001_s_cerevisiae_filtered_folddisco_Folddisco.tsv
query/M-CSA/single/M0001.txt	s_cerevisiae_filtered_folddisco	12	--covered-node-ratio 0.75 --skip-match	Folddisco_prefilter	0.018	3	result/M0001_s_cerevisiae_filtered_folddisco_Folddisco_prefilter.tsv
query/M-CSA/single/M0002.txt	s_cerevisiae_filtered_folddisco	12	--covered-node-ratio 0.75 --rmsd 2.0	Folddisco	0.106	47	result/M0002_s_cerevisiae_filtered_folddisco_Folddisco.tsv
query/M-CSA/single/M0002.txt	s_cerevisiae_filtered_folddisco	12	--covered-node-ratio 0.75 --skip-match	Folddisco_prefilter	0.016	26	result/M0002_s_cerevisiae_filtered_folddisco_Folddisco_prefilter.tsv
query/M-CSA/single/M0003.txt	s_cerevisiae_filtered_folddisco	12	--covered-node-ratio 0.75 --rmsd 2.0	Folddisco	0.048	4	result/M0003_s_cerevisiae_filtered_folddisco_Folddisco.tsv
query/M-CSA/single/M0003.txt	s_cerevisiae_filtered_folddisco	12	--covered-node-ratio 0.75 --skip-match	Folddisco_prefilter	0.02	2	result/M0003_s_cerevisiae_filtered_folddisco_Folddisco_prefilter.tsv
query/M-CSA/single/M0004.txt	s_cerevisiae_filtered_folddisco	12	--covered-node-ratio 0.75 --rmsd 2.0	Folddisco	0.064	0	result/M0004_s_cerevisiae_filtered_folddisco_Folddisco.tsv
query/M-CSA/single/M0004.txt	s_cerevisiae_filtered_folddisco	12	--covered-node-ratio 0.75 --skip-match	Folddisco_prefilter	0.022	2	result/M0004_s_cerevisiae_filtered_folddisco_Folddisco_prefilter.tsv
query/M-CSA/single/M0005.txt	s_cerevisiae_filtered_folddisco	12	--covered-node-ratio 0.75 --rmsd 2.0	Folddisco	0.091	84	result/M0005_s_cerevisiae_filtered_folddisco_Folddisco.tsv
query/M-CSA/single/M0005.txt	s_cerevisiae_filtered_folddisco	12	--covered-node-ratio 0.75 --skip-match	Folddisco_prefilter	0.017	47	result/M0005_s_cerevisiae_filtered_folddisco_Folddisco_prefilter.tsv
query/M-CSA/single/M0006.txt	s_cerevisiae_filtered_folddisco	12	--covered-node-ratio 0.75 --rmsd 2.0	Folddisco	0.067	9	result/M0006_s_cerevisiae_filtered_folddisco_Folddisco.tsv
query/M-CSA/single/M0006.txt	s_cerevisiae_filtered_folddisco	12	--covered-node-ratio 0.75 --skip-match	Folddisco_prefilter	0.018	4	result/M0006_s_cerevisiae_filtered_folddisco_Folddisco_prefilter.tsv
query/M-CSA/single/M0007.txt	s_cerevisiae_filtered_folddisco	12	--covered-node-ratio 0.75 --rmsd 2.0	Folddisco	0.09	67	result/M0007_s_cerevisiae_filtered_folddisco_Folddisco.tsv
query/M-CSA/single/M0007.txt	s_cerevisiae_filtered_folddisco	12	--covered-node-ratio 0.75 --skip-match	Folddisco_prefilter	0.016	51	result/M0007_s_cerevisiae_filtered_folddisco_Folddisco_prefilter.tsv
query/M-CSA/single/M0008.txt	s_cerevisiae_filtered_folddisco	12	--covered-node-ratio 0.75 --rmsd 2.0	Folddisco	0.102	54	result/M0008_s_cerevisiae_filtered_folddisco_Folddisco.tsv
query/M-CSA/single/M0008.txt	s_cerevisiae_filtered_folddisco	12	--covered-node-ratio 0.75 --skip-match	Folddisco_prefilter	0.023	32	result/M0008_s_cerevisiae_filtered_folddisco_Folddisco_prefilter.tsv
query/M-CSA/single/M0009.txt	s_cerevisiae_filtered_folddisco	12	--covered-node-ratio 0.75 --rmsd 2.0	Folddisco	0.399	0	result/M0009_s_cerevisiae_filtered_folddisco_Folddisco.tsv
query/M-CSA/single/M0009.txt	s_cerevisiae_filtered_folddisco	12	--covered-node-ratio 0.75 --skip-match	Folddisco_prefilter	0.025	92	result/M0009_s_cerevisiae_filtered_folddisco_Folddisco_prefilter.tsv
query/M-CSA/single/M0010.txt	s_cerevisiae_filtered_folddisco	12	--covered-node-ratio 0.75 --rmsd 2.0	Folddisco	0.065	40	result/M0010_s_cerevisiae_filtered_folddisco_Folddisco.tsv
query/M-CSA/single/M0010.txt	s_cerevisiae_filtered_folddisco	12	--covered-node-ratio 0.75 --skip-match	Folddisco_prefilter	0.017	16	result/M0010_s_cerevisiae_filtered_folddisco_Folddisco_prefilter.tsv
query/M-CSA/single/M0011.txt	s_cerevisiae_filtered_folddisco	12	--covered-node-ratio 0.75 --rmsd 2.0	Folddisco	0.016	0	result/M0011_s_cerevisiae_filtered_folddisco_Folddisco.tsv
query/M-CSA/single/M0011.txt	s_cerevisiae_filtered_folddisco	12	--covered-node-ratio 0.75 --skip-match	Folddisco_prefilter	0.012	0	result/M0011_s_cerevisiae_filtered_folddisco_Folddisco_prefilter.tsv
query/M-CSA/single/M0012.txt	s_cerevisiae_filtered_folddisco	12	--covered-node-ratio 0.75 --rmsd 2.0	Folddisco	0.019	1	result/M0012_s_cerevisiae_filtered_folddisco_Folddisco.tsv
query/M-CSA/single/M0012.txt	s_cerevisiae_filtered_folddisco	12	--covered-node-ratio 0.75 --skip-match	Folddisco_prefilter	0.013	1	result/M0012_s_cerevisiae_filtered_folddisco_Folddisco_prefilter.tsv
query/M-CSA/single/M0013.txt	s_cerevisiae_filtered_folddisco	12	--covered-node-ratio 0.75 --rmsd 2.0	Folddisco	0.02	0	result/M0013_s_cerevisiae_filtered_folddisco_Folddisco.tsv
query/M-CSA/single/M0013.txt	s_cerevisiae_filtered_folddisco	12	--covered-node-ratio 0.75 --skip-match	Folddisco_prefilter	0.018	0	result/M0013_s_cerevisiae_filtered_folddisco_Folddisco_prefilter.tsv
query/M-CSA/single/M0014.txt	s_cerevisiae_filtered_folddisco	12	--covered-node-ratio 0.75 --rmsd 2.0	Folddisco	0.09	34	result/M0014_s_cerevisiae_filtered_folddisco_Folddisco.tsv
query/M-CSA/single/M0014.txt	s_cerevisiae_filtered_folddisco	12	--covered-node-ratio 0.75 --skip-match	Folddisco_prefilter	0.02	16	result/M0014_s_cerevisiae_filtered_folddisco_Folddisco_prefilter.tsv
query/M-CSA/single/M0015.txt	s_cerevisiae_filtered_folddisco	12	--covered-node-ratio 0.75 --rmsd 2.0	Folddisco	0.039	0	result/M0015_s_cerevisiae_filtered_folddisco_Folddisco.tsv
query/M-CSA/single/M0015.txt	s_cerevisiae_filtered_folddisco	12	--covered-node-ratio 0.75 --skip-match	Folddisco_prefilter	0.016	1	result/M0015_s_cerevisiae_filtered_folddisco_Folddisco_prefilter.tsv
query/M-CSA/single/M0016.txt	s_cerevisiae_filtered_folddisco	12	--covered-node-ratio 0.75 --rmsd 2.0	Folddisco	0.039	0	result/M0016_s_cerevisiae_filtered_folddisco_Folddisco.tsv
query/M-CSA/single/M0016.txt	s_cerevisiae_filtered_folddisco	12	--covered-node-ratio 0.75 --skip-match	Folddisco_prefilter	0.013	2	result/M0016_s_cerevisiae_filtered_folddisco_Folddisco_prefilter.tsv
query/M-CSA/single/M0017.txt	s_cerevisiae_filtered_folddisco	12	--covered-node-ratio 0.75 --rmsd 2.0	Folddisco	0.036	6	result/M0017_s_cerevisiae_filtered_folddisco_Folddisco.tsv
query/M-CSA/single/M0017.txt	s_cerevisiae_filtered_folddisco	12	--covered-node-ratio 0.75 --skip-match	Folddisco_prefilter	0.012	3	result/M0017_s_cerevisiae_filtered_folddisco_Folddisco_prefilter.tsv
query/M-CSA/single/M0018.txt	s_cerevisiae_filtered_folddisco	12	--covered-node-ratio 0.75 --rmsd 2.0	Folddisco	0.029	11	result/M0018_s_cerevisiae_filtered_folddisco_Folddisco.tsv
query/M-CSA/single/M0018.txt	s_cerevisiae_filtered_folddisco	12	--covered-node-ratio 0.75 --skip-match	Folddisco_prefilter	0.013	5	result/M0018_s_cerevisiae_filtered_folddisco_Folddisco_prefilter.tsv
query/M-CSA/single/M0019.txt	s_cerevisiae_filtered_folddisco	12	--covered-node-ratio 0.75 --rmsd 2.0	Folddisco	0.135	196	result/M0019_s_cerevisiae_filtered_folddisco_Folddisco.tsv
query/M-CSA/single/M0019.txt	s_cerevisiae_filtered_folddisco	12	--covered-node-ratio 0.75 --skip-match	Folddisco_prefilter	0.016	111	result/M0019_s_cerevisiae_filtered_folddisco_Folddisco_prefilter.tsv
query/M-CSA/single/M0020.txt	s_cerevisiae_filtered_folddisco	12	--covered-node-ratio 0.75 --rmsd 2.0	Folddisco	0.038	1	result/M0020_s_cerevisiae_filtered_folddisco_Folddisco.tsv
query/M-CSA/single/M0020.txt	s_cerevisiae_filtered_folddisco	12	--covered-node-ratio 0.75 --skip-match	Folddisco_prefilter	0.018	5	result/M0020_s_cerevisiae_filtered_folddisco_Folddisco_prefilter.tsv
query/M-CSA/single/M0021.txt	s_cerevisiae_filtered_folddisco	12	--covered-node-ratio 0.75 --rmsd 2.0	Folddisco	0.198	44	result/M0021_s_cerevisiae_filtered_folddisco_Folddisco.tsv
query/M-CSA/single/M0021.txt	s_cerevisiae_filtered_folddisco	12	--covered-node-ratio 0.75 --skip-match	Folddisco_prefilter	0.031	66	result/M0021_s_cerevisiae_filtered_folddisco_Folddisco_prefilter.tsv
query/M-CSA/single/M0022.txt	s_cerevisiae_filtered_folddisco	12	--covered-node-ratio 0.75 --rmsd 2.0	Folddisco	0.099	83	result/M0022_s_cerevisiae_filtered_folddisco_Folddisco.tsv
query/M-CSA/single/M0022.txt	s_cerevisiae_filtered_folddisco	12	--covered-node-ratio 0.75 --skip-match	Folddisco_prefilter	0.017	42	result/M0022_s_cerevisiae_filtered_folddisco_Folddisco_prefilter.tsv
query/M-CSA/single/M0023.txt	s_cerevisiae_filtered_folddisco	12	--covered-node-ratio 0.75 --rmsd 2.0	Folddisco	0.029	2	result/M0023_s_cerevisiae_filtered_folddisco_Folddisco.tsv
query/M-CSA/single/M0023.txt	s_cerevisiae_filtered_folddisco	12	--covered-node-ratio 0.75 --skip-match	Folddisco_prefilter	0.016	2	result/M0023_s_cerevisiae_filtered_folddisco_Folddisco_prefilter.tsv
query/M-CSA/single/M0024.txt	s_cerevisiae_filtered_folddisco	12	--covered-node-ratio 0.75 --rmsd 2.0	Folddisco	0.044	7	result/M0024_s_cerevisiae_filtered_folddisco_Folddisco.tsv
query/M-CSA/single/M0024.txt	s_cerevisiae_filtered_folddisco	12	--covered-node-ratio 0.75 --skip-match	Folddisco_prefilter	0.019	3	result/M0024_s_cerevisiae_filtered_folddisco_Folddisco_prefilter.tsv
query/M-CSA/single/M0025.txt	s_cerevisiae_filtered_folddisco	12	--covered-node-ratio 0.75 --rmsd 2.0	Folddisco	0.048	10	result/M0025_s_cerevisiae_filtered_folddisco_Folddisco.tsv
query/M-CSA/single/M0025.txt	s_cerevisiae_filtered_folddisco	12	--covered-node-ratio 0.75 --skip-match	Folddisco_prefilter	0.018	4	result/M0025_s_cerevisiae_filtered_folddisco_Folddisco_prefilter.tsv
query/M-CSA/single/M0026.txt	s_cerevisiae_filtered_folddisco	12	--covered-node-ratio 0.75 --rmsd 2.0	Folddisco	0.054	13	result/M0026_s_cerevisiae_filtered_folddisco_Folddisco.tsv
query/M-CSA/single/M0026.txt	s_cerevisiae_filtered_folddisco	12	--covered-node-ratio 0.75 --skip-match	Folddisco_prefilter	0.015	10	result/M0026_s_cerevisiae_filtered_folddisco_Folddisco_prefilter.tsv
query/M-CSA/single/M0027.txt	s_cerevisiae_filtered_folddisco	12	--covered-node-ratio 0.75 --rmsd 2.0	Folddisco	0.043	0	result/M0027_s_cerevisiae_filtered_folddisco_Folddisco.tsv
query/M-CSA/single/M0027.txt	s_cerevisiae_filtered_folddisco	12	--covered-node-ratio 0.75 --skip-match	Folddisco_prefilter	0.015	6	result/M0027_s_cerevisiae_filtered_folddisco_Folddisco_prefilter.tsv
query/M-CSA/single/M0028.txt	s_cerevisiae_filtered_folddisco	12	--covered-node-ratio 0.75 --rmsd 2.0	Folddisco	0.068	10	result/M0028_s_cerevisiae_filtered_folddisco_Folddisco.tsv
query/M-CSA/single/M0028.txt	s_cerevisiae_filtered_folddisco	12	--covered-node-ratio 0.75 --skip-match	Folddisco_prefilter	0.023	9	result/M0028_s_cerevisiae_filtered_folddisco_Folddisco_prefilter.tsv
query/M-CSA/single/M0029.txt	s_cerevisiae_filtered_folddisco	12	--covered-node-ratio 0.75 --rmsd 2.0	Folddisco	0.071	15	result/M0029_s_cerevisiae_filtered_folddisco_Folddisco.tsv
query/M-CSA/single/M0029.txt	s_cerevisiae_filtered_folddisco	12	--covered-node-ratio 0.75 --skip-match	Folddisco_prefilter	0.017	12	result/M0029_s_cerevisiae_filtered_folddisco_Folddisco_prefilter.tsv
query/M-CSA/single/M0030.txt	s_cerevisiae_filtered_folddisco	12	--covered-node-ratio 0.75 --rmsd 2.0	Folddisco	0.022	0	result/M0030_s_cerevisiae_filtered_folddisco_Folddisco.tsv
query/M-CSA/single/M0030.txt	s_cerevisiae_filtered_folddisco	12	--covered-node-ratio 0.75 --skip-match	Folddisco_prefilter	0.017	0	result/M0030_s_cerevisiae_filtered_folddisco_Folddisco_prefilter.tsv
query/M-CSA/single/M0031.txt	s_cerevisiae_filtered_folddisco	12	--covered-node-ratio 0.75 --rmsd 2.0	Folddisco	0.024	1	result/M0031_s_cerevisiae_filtered_folddisco_Folddisco.tsv
query/M-CSA/single/M0031.txt	s_cerevisiae_filtered_folddisco	12	--covered-node-ratio 0.75 --skip-match	Folddisco_prefilter	0.014	1	result/M0031_s_cerevisiae_filtered_folddisco_Folddisco_prefilter.tsv
query/M-CSA/single/M0032.txt	s_cerevisiae_filtered_folddisco	12	--covered-node-ratio 0.75 --rmsd 2.0	Folddisco	0.026	4	result/M0032_s_cerevisiae_filtered_folddisco_Folddisco.tsv
query/M-CSA/single/M0032.txt	s_cerevisiae_filtered_folddisco	12	--covered-node-ratio 0.75 --skip-match	Folddisco_prefilter	0.013	2	result/M0032_s_cerevisiae_filtered_folddisco_Folddisco_prefilter.tsv
query/M-CSA/single/M0033.txt	s_cerevisiae_filtered_folddisco	12	--covered-node-ratio 0.75 --rmsd 2.0	Folddisco	0.081	13	result/M0033_s_cerevisiae_filtered_folddisco_Folddisco.tsv
query/M-CSA/single/M0033.txt	s_cerevisiae_filtered_folddisco	12	--covered-node-ratio 0.75 --skip-match	Folddisco_prefilter	0.017	24	result/M0033_s_cerevisiae_filtered_folddisco_Folddisco_prefilter.tsv
query/M-CSA/single/M0034.txt	s_cerevisiae_filtered_folddisco	12	--covered-node-ratio 0.75 --rmsd 2.0	Folddisco	0.048	0	result/M0034_s_cerevisiae_filtered_folddisco_Folddisco.tsv
query/M-CSA/single/M0034.txt	s_cerevisiae_filtered_folddisco	12	--covered-node-ratio 0.75 --skip-match	Folddisco_prefilter	0.018	2	result/M0034_s_cerevisiae_filtered_folddisco_Folddisco_prefilter.tsv
query/M-CSA/single/M0035.txt	s_cerevisiae_filtered_folddisco	12	--covered-node-ratio 0.75 --rmsd 2.0	Folddisco	0.098	103	result/M0035_s_cerevisiae_filtered_folddisco_Folddisco.tsv
query/M-CSA/single/M0035.txt	s_cerevisiae_filtered_folddisco	12	--covered-node-ratio 0.75 --skip-match	Folddisco_prefilter	0.016	94	result/M0035_s_cerevisiae_filtered_folddisco_Folddisco_prefilter.tsv
query/M-CSA/single/M0036.txt	s_cerevisiae_filtered_folddisco	12	--covered-node-ratio 0.75 --rmsd 2.0	Folddisco	0.271	17	result/M0036_s_cerevisiae_filtered_folddisco_Folddisco.tsv
query/M-CSA/single/M0036.txt	s_cerevisiae_filtered_folddisco	12	--covered-node-ratio 0.75 --skip-match	Folddisco_prefilter	0.024	75	result/M0036_s_cerevisiae_filtered_folddisco_Folddisco_prefilter.tsv
query/M-CSA/single/M0037.txt	s_cerevisiae_filtered_folddisco	12	--covered-node-ratio 0.75 --rmsd 2.0	Folddisco	0.23	125	result/M0037_s_cerevisiae_filtered_folddisco_Folddisco.tsv
query/M-CSA/single/M0037.txt	s_cerevisiae_filtered_folddisco	12	--covered-node-ratio 0.75 --skip-match	Folddisco_prefilter	0.032	103	result/M0037_s_cerevisiae_filtered_folddisco_Folddisco_prefilter.tsv
query/M-CSA/single/M0038.txt	s_cerevisiae_filtered_folddisco	12	--covered-node-ratio 0.75 --rmsd 2.0	Folddisco	0.03	0	result/M0038_s_cerevisiae_filtered_folddisco_Folddisco.tsv
query/M-CSA/single/M0038.txt	s_cerevisiae_filtered_folddisco	12	--covered-node-ratio 0.75 --skip-match	Folddisco_prefilter	0.03	0	result/M0038_s_cerevisiae_filtered_folddisco_Folddisco_prefilter.tsv
query/M-CSA/single/M0039.txt	s_cerevisiae_filtered_folddisco	12	--covered-node-ratio 0.75 --rmsd 2.0	Folddisco	0.105	19	result/M0039_s_cerevisiae_filtered_folddisco_Folddisco.tsv
query/M-CSA/single/M0039.txt	s_cerevisiae_filtered_folddisco	12	--covered-node-ratio 0.75 --skip-match	Folddisco_prefilter	0.023	33	result/M0039_s_cerevisiae_filtered_folddisco_Folddisco_prefilter.tsv
query/M-CSA/single/M0040.txt	s_cerevisiae_filtered_folddisco	12	--covered-node-ratio 0.75 --rmsd 2.0	Folddisco	0.047	8	result/M0040_s_cerevisiae_filtered_folddisco_Folddisco.tsv
query/M-CSA/single/M0040.txt	s_cerevisiae_filtered_folddisco	12	--covered-node-ratio 0.75 --skip-match	Folddisco_prefilter	0.02	5	result/M0040_s_cerevisiae_filtered_folddisco_Folddisco_prefilter.tsv
query/M-CSA/single/M0041.txt	s_cerevisiae_filtered_folddisco	12	--covered-node-ratio 0.75 --rmsd 2.0	Folddisco	0.017	0	result/M0041_s_cerevisiae_filtered_folddisco_Folddisco.tsv
query/M-CSA/single/M0041.txt	s_cerevisiae_filtered_folddisco	12	--covered-node-ratio 0.75 --skip-match	Folddisco_prefilter	0.012	0	result/M0041_s_cerevisiae_filtered_folddisco_Folddisco_prefilter.tsv
query/M-CSA/single/M0042.txt	s_cerevisiae_filtered_folddisco	12	--covered-node-ratio 0.75 --rmsd 2.0	Folddisco	0.09	38	result/M0042_s_cerevisiae_filtered_folddisco_Folddisco.tsv
query/M-CSA/single/M0042.txt	s_cerevisiae_filtered_folddisco	12	--covered-node-ratio 0.75 --skip-match	Folddisco_prefilter	0.017	23	result/M0042_s_cerevisiae_filtered_folddisco_Folddisco_prefilter.tsv
query/M-CSA/single/M0043.txt	s_cerevisiae_filtered_folddisco	12	--covered-node-ratio 0.75 --rmsd 2.0	Folddisco	0.034	0	result/M0043_s_cerevisiae_filtered_folddisco_Folddisco.tsv
query/M-CSA/single/M0043.txt	s_cerevisiae_filtered_folddisco	12	--covered-node-ratio 0.75 --skip-match	Folddisco_prefilter	0.023	2	result/M0043_s_cerevisiae_filtered_folddisco_Folddisco_prefilter.tsv
query/M-CSA/single/M0044.txt	s_cerevisiae_filtered_folddisco	12	--covered-node-ratio 0.75 --rmsd 2.0	Folddisco	0.171	0	result/M0044_s_cerevisiae_filtered_folddisco_Folddisco.tsv
query/M-CSA/single/M0044.txt	s_cerevisiae_filtered_folddisco	12	--covered-node-ratio 0.75 --skip-match	Folddisco_prefilter	0.023	28	result/M0044_s_cerevisiae_filtered_folddisco_Folddisco_prefilter.tsv
query/M-CSA/single/M0045.txt	s_cerevisiae_filtered_folddisco	12	--covered-node-ratio 0.75 --rmsd 2.0	Folddisco	0.124	159	result/M0045_s_cerevisiae_filtered_folddisco_Folddisco.tsv
query/M-CSA/single/M0045.txt	s_cerevisiae_filtered_folddisco	12	--covered-node-ratio 0.75 --skip-match	Folddisco_prefilter	0.018	95	result/M0045_s_cerevisiae_filtered_folddisco_Folddisco_prefilter.tsv
query/M-CSA/single/M0046.txt	s_cerevisiae_filtered_folddisco	12	--covered-node-ratio 0.75 --rmsd 2.0	Folddisco	0.085	97	result/M0046_s_cerevisiae_filtered_folddisco_Folddisco.tsv
query/M-CSA/single/M0046.txt	s_cerevisiae_filtered_folddisco	12	--covered-node-ratio 0.75 --skip-match	Folddisco_prefilter	0.016	47	result/M0046_s_cerevisiae_filtered_folddisco_Folddisco_prefilter.tsv
query/M-CSA/single/M0047.txt	s_cerevisiae_filtered_folddisco	12	--covered-node-ratio 0.75 --rmsd 2.0	Folddisco	0.045	7	result/M0047_s_cerevisiae_filtered_folddisco_Folddisco.tsv
query/M-CSA/single/M0047.txt	s_cerevisiae_filtered_folddisco	12	--covered-node-ratio 0.75 --skip-match	Folddisco_prefilter	0.015	4	result/M0047_s_cerevisiae_filtered_folddisco_Folddisco_prefilter.tsv
query/M-CSA/single/M0048.txt	s_cerevisiae_filtered_folddisco	12	--covered-node-ratio 0.75 --rmsd 2.0	Folddisco	0.19	243	result/M0048_s_cerevisiae_filtered_folddisco_Folddisco.tsv
query/M-CSA/single/M0048.txt	s_cerevisiae_filtered_folddisco	12	--covered-node-ratio 0.75 --skip-match	Folddisco_prefilter	0.02	143	result/M0048_s_cerevisiae_filtered_folddisco_Folddisco_prefilter.tsv
query/M-CSA/single/M0049.txt	s_cerevisiae_filtered_folddisco	12	--covered-node-ratio 0.75 --rmsd 2.0	Folddisco	0.026	0	result/M0049_s_cerevisiae_filtered_folddisco_Folddisco.tsv
query/M-CSA/single/M0049.txt	s_cerevisiae_filtered_folddisco	12	--covered-node-ratio 0.75 --skip-match	Folddisco_prefilter	0.022	0	result/M0049_s_cerevisiae_filtered_folddisco_Folddisco_prefilter.tsv
query/M-CSA/single/M0050.txt	s_cerevisiae_filtered_folddisco	12	--covered-node-ratio 0.75 --rmsd 2.0	Folddisco	0.142	23	result/M0050_s_cerevisiae_filtered_folddisco_Folddisco.tsv
query/M-CSA/single/M0050.txt	s_cerevisiae_filtered_folddisco	12	--covered-node-ratio 0.75 --skip-match	Folddisco_prefilter	0.024	52	result/M0050_s_cerevisiae_filtered_folddisco_Folddisco_prefilter.tsv
query/M-CSA/single/M0051.txt	s_cerevisiae_filtered_folddisco	12	--covered-node-ratio 0.75 --rmsd 2.0	Folddisco	0.206	63	result/M0051_s_cerevisiae_filtered_folddisco_Folddisco.tsv
query/M-CSA/single/M0051.txt	s_cerevisiae_filtered_folddisco	12	--covered-node-ratio 0.75 --skip-match	Folddisco_prefilter	0.023	69	result/M0051_s_cerevisiae_filtered_folddisco_Folddisco_prefilter.tsv
query/M-CSA/single/M0052.txt	s_cerevisiae_filtered_folddisco	12	--covered-node-ratio 0.75 --rmsd 2.0	Folddisco	0.029	1	result/M0052_s_cerevisiae_filtered_folddisco_Folddisco.tsv
query/M-CSA/single/M0052.txt	s_cerevisiae_filtered_folddisco	12	--covered-node-ratio 0.75 --skip-match	Folddisco_prefilter	0.014	2	result/M0052_s_cerevisiae_filtered_folddisco_Folddisco_prefilter.tsv
query/M-CSA/single/M0053.txt	s_cerevisiae_filtered_folddisco	12	--covered-node-ratio 0.75 --rmsd 2.0	Folddisco	0.09	1	result/M0053_s_cerevisiae_filtered_folddisco_Folddisco.tsv
query/M-CSA/single/M0053.txt	s_cerevisiae_filtered_folddisco	12	--covered-node-ratio 0.75 --skip-match	Folddisco_prefilter	0.019	14	result/M0053_s_cerevisiae_filtered_folddisco_Folddisco_prefilter.tsv
query/M-CSA/single/M0054.txt	s_cerevisiae_filtered_folddisco	12	--covered-node-ratio 0.75 --rmsd 2.0	Folddisco	0.037	2	result/M0054_s_cerevisiae_filtered_folddisco_Folddisco.tsv
query/M-CSA/single/M0054.txt	s_cerevisiae_filtered_folddisco	12	--covered-node-ratio 0.75 --skip-match	Folddisco_prefilter	0.013	1	result/M0054_s_cerevisiae_filtered_folddisco_Folddisco_prefilter.tsv
query/M-CSA/single/M0055.txt	s_cerevisiae_filtered_folddisco	12	--covered-node-ratio 0.75 --rmsd 2.0	Folddisco	0.149	22	result/M0055_s_cerevisiae_filtered_folddisco_Folddisco.tsv
query/M-CSA/single/M0055.txt	s_cerevisiae_filtered_folddisco	12	--covered-node-ratio 0.75 --skip-match	Folddisco_prefilter	0.03	28	result/M0055_s_cerevisiae_filtered_folddisco_Folddisco_prefilter.tsv
query/M-CSA/single/M0056.txt	s_cerevisiae_filtered_folddisco	12	--covered-node-ratio 0.75 --rmsd 2.0	Folddisco	0.059	26	result/M0056_s_cerevisiae_filtered_folddisco_Folddisco.tsv
query/M-CSA/single/M0056.txt	s_cerevisiae_filtered_folddisco	12	--covered-node-ratio 0.75 --skip-match	Folddisco_prefilter	0.019	14	result/M0056_s_cerevisiae_filtered_folddisco_Folddisco_prefilter.tsv
query/M-CSA/single/M0057.txt	s_cerevisiae_filtered_folddisco	12	--covered-node-ratio 0.75 --rmsd 2.0	Folddisco	0.022	0	result/M0057_s_cerevisiae_filtered_folddisco_Folddisco.tsv
query/M-CSA/single/M0057.txt	s_cerevisiae_filtered_folddisco	12	--covered-node-ratio 0.75 --skip-match	Folddisco_prefilter	0.017	0	result/M0057_s_cerevisiae_filtered_folddisco_Folddisco_prefilter.tsv
query/M-CSA/single/M0058.txt	s_cerevisiae_filtered_folddisco	12	--covered-node-ratio 0.75 --rmsd 2.0	Folddisco	0.134	119	result/M0058_s_cerevisiae_filtered_folddisco_Folddisco.tsv
query/M-CSA/single/M0058.txt	s_cerevisiae_filtered_folddisco	12	--covered-node-ratio 0.75 --skip-match	Folddisco_prefilter	0.02	75	result/M0058_s_cerevisiae_filtered_folddisco_Folddisco_prefilter.tsv
query/M-CSA/single/M0059.txt	s_cerevisiae_filtered_folddisco	12	--covered-node-ratio 0.75 --rmsd 2.0	Folddisco	0.087	4	result/M0059_s_cerevisiae_filtered_folddisco_Folddisco.tsv
query/M-CSA/single/M0059.txt	s_cerevisiae_filtered_folddisco	12	--covered-node-ratio 0.75 --skip-match	Folddisco_prefilter	0.018	7	result/M0059_s_cerevisiae_filtered_folddisco_Folddisco_prefilter.tsv
query/M-CSA/single/M0060.txt	s_cerevisiae_filtered_folddisco	12	--covered-node-ratio 0.75 --rmsd 2.0	Folddisco	0.073	37	result/M0060_s_cerevisiae_filtered_folddisco_Folddisco.tsv
query/M-CSA/single/M0060.txt	s_cerevisiae_filtered_folddisco	12	--covered-node-ratio 0.75 --skip-match	Folddisco_prefilter	0.015	21	result/M0060_s_cerevisiae_filtered_folddisco_Folddisco_prefilter.tsv
query/M-CSA/single/M0061.txt	s_cerevisiae_filtered_folddisco	12	--covered-node-ratio 0.75 --rmsd 2.0	Folddisco	0.059	26	result/M0061_s_cerevisiae_filtered_folddisco_Folddisco.tsv
query/M-CSA/single/M0061.txt	s_cerevisiae_filtered_folddisco	12	--covered-node-ratio 0.75 --skip-match	Folddisco_prefilter	0.015	13	result/M0061_s_cerevisiae_filtered_folddisco_Folddisco_prefilter.tsv
query/M-CSA/single/M0062.txt	s_cerevisiae_filtered_folddisco	12	--covered-node-ratio 0.75 --rmsd 2.0	Folddisco	0.08	5	result/M0062_s_cerevisiae_filtered_folddisco_Folddisco.tsv
query/M-CSA/single/M0062.txt	s_cerevisiae_filtered_folddisco	12	--covered-node-ratio 0.75 --skip-match	Folddisco_prefilter	0.028	6	result/M0062_s_cerevisiae_filtered_folddisco_Folddisco_prefilter.tsv
query/M-CSA/single/M0063.txt	s_cerevisiae_filtered_folddisco	12	--covered-node-ratio 0.75 --rmsd 2.0	Folddisco	0.112	107	result/M0063_s_cerevisiae_filtered_folddisco_Folddisco.tsv
query/M-CSA/single/M0063.txt	s_cerevisiae_filtered_folddisco	12	--covered-node-ratio 0.75 --skip-match	Folddisco_prefilter	0.021	50	result/M0063_s_cerevisiae_filtered_folddisco_Folddisco_prefilter.tsv
query/M-CSA/single/M0064.txt	s_cerevisiae_filtered_folddisco	12	--covered-node-ratio 0.75 --rmsd 2.0	Folddisco	0.065	12	result/M0064_s_cerevisiae_filtered_folddisco_Folddisco.tsv
query/M-CSA/single/M0064.txt	s_cerevisiae_filtered_folddisco	12	--covered-node-ratio 0.75 --skip-match	Folddisco_prefilter	0.016	10	result/M0064_s_cerevisiae_filtered_folddisco_Folddisco_prefilter.tsv
query/M-CSA/single/M0065.txt	s_cerevisiae_filtered_folddisco	12	--covered-node-ratio 0.75 --rmsd 2.0	Folddisco	0.111	46	result/M0065_s_cerevisiae_filtered_folddisco_Folddisco.tsv
query/M-CSA/single/M0065.txt	s_cerevisiae_filtered_folddisco	12	--covered-node-ratio 0.75 --skip-match	Folddisco_prefilter	0.017	20	result/M0065_s_cerevisiae_filtered_folddisco_Folddisco_prefilter.tsv
query/M-CSA/single/M0066.txt	s_cerevisiae_filtered_folddisco	12	--covered-node-ratio 0.75 --rmsd 2.0	Folddisco	0.107	119	result/M0066_s_cerevisiae_filtered_folddisco_Folddisco.tsv
query/M-CSA/single/M0066.txt	s_cerevisiae_filtered_folddisco	12	--covered-node-ratio 0.75 --skip-match	Folddisco_prefilter	0.015	55	result/M0066_s_cerevisiae_filtered_folddisco_Folddisco_prefilter.tsv
query/M-CSA/single/M0067.txt	s_cerevisiae_filtered_folddisco	12	--covered-node-ratio 0.75 --rmsd 2.0	Folddisco	0.06	12	result/M0067_s_cerevisiae_filtered_folddisco_Folddisco.tsv
query/M-CSA/single/M0067.txt	s_cerevisiae_filtered_folddisco	12	--covered-node-ratio 0.75 --skip-match	Folddisco_prefilter	0.015	5	result/M0067_s_cerevisiae_filtered_folddisco_Folddisco_prefilter.tsv
query/M-CSA/single/M0068.txt	s_cerevisiae_filtered_folddisco	12	--covered-node-ratio 0.75 --rmsd 2.0	Folddisco	0.113	99	result/M0068_s_cerevisiae_filtered_folddisco_Folddisco.tsv
query/M-CSA/single/M0068.txt	s_cerevisiae_filtered_folddisco	12	--covered-node-ratio 0.75 --skip-match	Folddisco_prefilter	0.021	45	result/M0068_s_cerevisiae_filtered_folddisco_Folddisco_prefilter.tsv
query/M-CSA/single/M0069.txt	s_cerevisiae_filtered_folddisco	12	--covered-node-ratio 0.75 --rmsd 2.0	Folddisco	0.04	6	result/M0069_s_cerevisiae_filtered_folddisco_Folddisco.tsv
query/M-CSA/single/M0069.txt	s_cerevisiae_filtered_folddisco	12	--covered-node-ratio 0.75 --skip-match	Folddisco_prefilter	0.014	3	result/M0069_s_cerevisiae_filtered_folddisco_Folddisco_prefilter.tsv
query/M-CSA/single/M0070.txt	s_cerevisiae_filtered_folddisco	12	--covered-node-ratio 0.75 --rmsd 2.0	Folddisco	0.021	0	result/M0070_s_cerevisiae_filtered_folddisco_Folddisco.tsv
query/M-CSA/single/M0070.txt	s_cerevisiae_filtered_folddisco	12	--covered-node-ratio 0.75 --skip-match	Folddisco_prefilter	0.016	0	result/M0070_s_cerevisiae_filtered_folddisco_Folddisco_prefilter.tsv
query/M-CSA/single/M0071.txt	s_cerevisiae_filtered_folddisco	12	--covered-node-ratio 0.75 --rmsd 2.0	Folddisco	0.081	25	result/M0071_s_cerevisiae_filtered_folddisco_Folddisco.tsv
query/M-CSA/single/M0071.txt	s_cerevisiae_filtered_folddisco	12	--covered-node-ratio 0.75 --skip-match	Folddisco_prefilter	0.013	12	result/M0071_s_cerevisiae_filtered_folddisco_Folddisco_prefilter.tsv
query/M-CSA/single/M0072.txt	s_cerevisiae_filtered_folddisco	12	--covered-node-ratio 0.75 --rmsd 2.0	Folddisco	0.017	0	result/M0072_s_cerevisiae_filtered_folddisco_Folddisco.tsv
query/M-CSA/single/M0072.txt	s_cerevisiae_filtered_folddisco	12	--covered-node-ratio 0.75 --skip-match	Folddisco_prefilter	0.013	0	result/M0072_s_cerevisiae_filtered_folddisco_Folddisco_prefilter.tsv
query/M-CSA/single/M0073.txt	s_cerevisiae_filtered_folddisco	12	--covered-node-ratio 0.75 --rmsd 2.0	Folddisco	0.046	8	result/M0073_s_cerevisiae_filtered_folddisco_Folddisco.tsv
query/M-CSA/single/M0073.txt	s_cerevisiae_filtered_folddisco	12	--covered-node-ratio 0.75 --skip-match	Folddisco_prefilter	0.018	6	result/M0073_s_cerevisiae_filtered_folddisco_Folddisco_prefilter.tsv
query/M-CSA/single/M0074.txt	s_cerevisiae_filtered_folddisco	12	--covered-node-ratio 0.75 --rmsd 2.0	Folddisco	0.474	97	result/M0074_s_cerevisiae_filtered_folddisco_Folddisco.tsv
query/M-CSA/single/M0074.txt	s_cerevisiae_filtered_folddisco	12	--covered-node-ratio 0.75 --skip-match	Folddisco_prefilter	0.023	321	result/M0074_s_cerevisiae_filtered_folddisco_Folddisco_prefilter.tsv
query/M-CSA/single/M0075.txt	s_cerevisiae_filtered_folddisco	12	--covered-node-ratio 0.75 --rmsd 2.0	Folddisco	0.071	20	result/M0075_s_cerevisiae_filtered_folddisco_Folddisco.tsv
query/M-CSA/single/M0075.txt	s_cerevisiae_filtered_folddisco	12	--covered-node-ratio 0.75 --skip-match	Folddisco_prefilter	0.016	7	result/M0075_s_cerevisiae_filtered_folddisco_Folddisco_prefilter.tsv
query/M-CSA/single/M0076.txt	s_cerevisiae_filtered_folddisco	12	--covered-node-ratio 0.75 --rmsd 2.0	Folddisco	0.083	26	result/M0076_s_cerevisiae_filtered_folddisco_Folddisco.tsv
query/M-CSA/single/M0076.txt	s_cerevisiae_filtered_folddisco	12	--covered-node-ratio 0.75 --skip-match	Folddisco_prefilter	0.015	11	result/M0076_s_cerevisiae_filtered_folddisco_Folddisco_prefilter.tsv
query/M-CSA/single/M0077.txt	s_cerevisiae_filtered_folddisco	12	--covered-node-ratio 0.75 --rmsd 2.0	Folddisco	0.038	3	result/M0077_s_cerevisiae_filtered_folddisco_Folddisco.tsv
query/M-CSA/single/M0077.txt	s_cerevisiae_filtered_folddisco	12	--covered-node-ratio 0.75 --skip-match	Folddisco_prefilter	0.016	3	result/M0077_s_cerevisiae_filtered_folddisco_Folddisco_prefilter.tsv
query/M-CSA/single/M0078.txt	s_cerevisiae_filtered_folddisco	12	--covered-node-ratio 0.75 --rmsd 2.0	Folddisco	0.088	59	result/M0078_s_cerevisiae_filtered_folddisco_Folddisco.tsv
query/M-CSA/single/M0078.txt	s_cerevisiae_filtered_folddisco	12	--covered-node-ratio 0.75 --skip-match	Folddisco_prefilter	0.016	32	result/M0078_s_cerevisiae_filtered_folddisco_Folddisco_prefilter.tsv
query/M-CSA/single/M0079.txt	s_cerevisiae_filtered_folddisco	12	--covered-node-ratio 0.75 --rmsd 2.0	Folddisco	0.03	2	result/M0079_s_cerevisiae_filtered_folddisco_Folddisco.tsv
query/M-CSA/single/M0079.txt	s_cerevisiae_filtered_folddisco	12	--covered-node-ratio 0.75 --skip-match	Folddisco_prefilter	0.013	2	result/M0079_s_cerevisiae_filtered_folddisco_Folddisco_prefilter.tsv
query/M-CSA/single/M0080.txt	s_cerevisiae_filtered_folddisco	12	--covered-node-ratio 0.75 --rmsd 2.0	Folddisco	0.023	0	result/M0080_s_cerevisiae_filtered_folddisco_Folddisco.tsv
query/M-CSA/single/M0080.txt	s_cerevisiae_filtered_folddisco	12	--covered-node-ratio 0.75 --skip-match	Folddisco_prefilter	0.018	0	result/M0080_s_cerevisiae_filtered_folddisco_Folddisco_prefilter.tsv
query/M-CSA/single/M0081.txt	s_cerevisiae_filtered_folddisco	12	--covered-node-ratio 0.75 --rmsd 2.0	Folddisco	0.12	33	result/M0081_s_cerevisiae_filtered_folddisco_Folddisco.tsv
query/M-CSA/single/M0081.txt	s_cerevisiae_filtered_folddisco	12	--covered-node-ratio 0.75 --skip-match	Folddisco_prefilter	0.019	37	result/M0081_s_cerevisiae_filtered_folddisco_Folddisco_prefilter.tsv
query/M-CSA/single/M0082.txt	s_cerevisiae_filtered_folddisco	12	--covered-node-ratio 0.75 --rmsd 2.0	Folddisco	0.087	0	result/M0082_s_cerevisiae_filtered_folddisco_Folddisco.tsv
query/M-CSA/single/M0082.txt	s_cerevisiae_filtered_folddisco	12	--covered-node-ratio 0.75 --skip-match	Folddisco_prefilter	0.031	3	result/M0082_s_cerevisiae_filtered_folddisco_Folddisco_prefilter.tsv
query/M-CSA/single/M0083.txt	s_cerevisiae_filtered_folddisco	12	--covered-node-ratio 0.75 --rmsd 2.0	Folddisco	0.116	12	result/M0083_s_cerevisiae_filtered_folddisco_Folddisco.tsv
query/M-CSA/single/M0083.txt	s_cerevisiae_filtered_folddisco	12	--covered-node-ratio 0.75 --skip-match	Folddisco_prefilter	0.018	42	result/M0083_s_cerevisiae_filtered_folddisco_Folddisco_prefilter.tsv
query/M-CSA/single/M0084.txt	s_cerevisiae_filtered_folddisco	12	--covered-node-ratio 0.75 --rmsd 2.0	Folddisco	0.018	0	result/M0084_s_cerevisiae_filtered_folddisco_Folddisco.tsv
query/M-CSA/single/M0084.txt	s_cerevisiae_filtered_folddisco	12	--covered-node-ratio 0.75 --skip-match	Folddisco_prefilter	0.015	0	result/M0084_s_cerevisiae_filtered_folddisco_Folddisco_prefilter.tsv
query/M-CSA/single/M0085.txt	s_cerevisiae_filtered_folddisco	12	--covered-node-ratio 0.75 --rmsd 2.0	Folddisco	0.043	0	result/M0085_s_cerevisiae_filtered_folddisco_Folddisco.tsv
query/M-CSA/single/M0085.txt	s_cerevisiae_filtered_folddisco	12	--covered-node-ratio 0.75 --skip-match	Folddisco_prefilter	0.014	1	result/M0085_s_cerevisiae_filtered_folddisco_Folddisco_prefilter.tsv
query/M-CSA/single/M0086.txt	s_cerevisiae_filtered_folddisco	12	--covered-node-ratio 0.75 --rmsd 2.0	Folddisco	0.064	4	result/M0086_s_cerevisiae_filtered_folddisco_Folddisco.tsv
query/M-CSA/single/M0086.txt	s_cerevisiae_filtered_folddisco	12	--covered-node-ratio 0.75 --skip-match	Folddisco_prefilter	0.014	8	result/M0086_s_cerevisiae_filtered_folddisco_Folddisco_prefilter.tsv
query/M-CSA/single/M0087.txt	s_cerevisiae_filtered_folddisco	12	--covered-node-ratio 0.75 --rmsd 2.0	Folddisco	0.022	0	result/M0087_s_cerevisiae_filtered_folddisco_Folddisco.tsv
query/M-CSA/single/M0087.txt	s_cerevisiae_filtered_folddisco	12	--covered-node-ratio 0.75 --skip-match	Folddisco_prefilter	0.017	0	result/M0087_s_cerevisiae_filtered_folddisco_Folddisco_prefilter.tsv
query/M-CSA/single/M0088.txt	s_cerevisiae_filtered_folddisco	12	--covered-node-ratio 0.75 --rmsd 2.0	Folddisco	0.044	4	result/M0088_s_cerevisiae_filtered_folddisco_Folddisco.tsv
query/M-CSA/single/M0088.txt	s_cerevisiae_filtered_folddisco	12	--covered-node-ratio 0.75 --skip-match	Folddisco_prefilter	0.017	5	result/M0088_s_cerevisiae_filtered_folddisco_Folddisco_prefilter.tsv
query/M-CSA/single/M0089.txt	s_cerevisiae_filtered_folddisco	12	--covered-node-ratio 0.75 --rmsd 2.0	Folddisco	0.436	6	result/M0089_s_cerevisiae_filtered_folddisco_Folddisco.tsv
query/M-CSA/single/M0089.txt	s_cerevisiae_filtered_folddisco	12	--covered-node-ratio 0.75 --skip-match	Folddisco_prefilter	0.024	99	result/M0089_s_cerevisiae_filtered_folddisco_Folddisco_prefilter.tsv
query/M-CSA/single/M0090.txt	s_cerevisiae_filtered_folddisco	12	--covered-node-ratio 0.75 --rmsd 2.0	Folddisco	0.304	2	result/M0090_s_cerevisiae_filtered_folddisco_Folddisco.tsv
query/M-CSA/single/M0090.txt	s_cerevisiae_filtered_folddisco	12	--covered-node-ratio 0.75 --skip-match	Folddisco_prefilter	0.037	55	result/M0090_s_cerevisiae_filtered_folddisco_Folddisco_prefilter.tsv
query/M-CSA/single/M0091.txt	s_cerevisiae_filtered_folddisco	12	--covered-node-ratio 0.75 --rmsd 2.0	Folddisco	0.511	2440	result/M0091_s_cerevisiae_filtered_folddisco_Folddisco.tsv
query/M-CSA/single/M0091.txt	s_cerevisiae_filtered_folddisco	12	--covered-node-ratio 0.75 --skip-match	Folddisco_prefilter	0.022	734	result/M0091_s_cerevisiae_filtered_folddisco_Folddisco_prefilter.tsv
query/M-CSA/single/M0092.txt	s_cerevisiae_filtered_folddisco	12	--covered-node-ratio 0.75 --rmsd 2.0	Folddisco	0.145	150	result/M0092_s_cerevisiae_filtered_folddisco_Folddisco.tsv
query/M-CSA/single/M0092.txt	s_cerevisiae_filtered_folddisco	12	--covered-node-ratio 0.75 --skip-match	Folddisco_prefilter	0.018	44	result/M0092_s_cerevisiae_filtered_folddisco_Folddisco_prefilter.tsv
query/M-CSA/single/M0093.txt	s_cerevisiae_filtered_folddisco	12	--covered-node-ratio 0.75 --rmsd 2.0	Folddisco	0.071	15	result/M0093_s_cerevisiae_filtered_folddisco_Folddisco.tsv
query/M-CSA/single/M0093.txt	s_cerevisiae_filtered_folddisco	12	--covered-node-ratio 0.75 --skip-match	Folddisco_prefilter	0.021	7	result/M0093_s_cerevisiae_filtered_folddisco_Folddisco_prefilter.tsv
query/M-CSA/single/M0094.txt	s_cerevisiae_filtered_folddisco	12	--covered-node-ratio 0.75 --rmsd 2.0	Folddisco	0.084	31	result/M0094_s_cerevisiae_filtered_folddisco_Folddisco.tsv
query/M-CSA/single/M0094.txt	s_cerevisiae_filtered_folddisco	12	--covered-node-ratio 0.75 --skip-match	Folddisco_prefilter	0.013	17	result/M0094_s_cerevisiae_filtered_folddisco_Folddisco_prefilter.tsv
query/M-CSA/single/M0095.txt	s_cerevisiae_filtered_folddisco	12	--covered-node-ratio 0.75 --rmsd 2.0	Folddisco	0.053	6	result/M0095_s_cerevisiae_filtered_folddisco_Folddisco.tsv
query/M-CSA/single/M0095.txt	s_cerevisiae_filtered_folddisco	12	--covered-node-ratio 0.75 --skip-match	Folddisco_prefilter	0.029	3	result/M0095_s_cerevisiae_filtered_folddisco_Folddisco_prefilter.tsv
query/M-CSA/single/M0096.txt	s_cerevisiae_filtered_folddisco	12	--covered-node-ratio 0.75 --rmsd 2.0	Folddisco	0.021	0	result/M0096_s_cerevisiae_filtered_folddisco_Folddisco.tsv
query/M-CSA/single/M0096.txt	s_cerevisiae_filtered_folddisco	12	--covered-node-ratio 0.75 --skip-match	Folddisco_prefilter	0.016	0	result/M0096_s_cerevisiae_filtered_folddisco_Folddisco_prefilter.tsv
query/M-CSA/single/M0097.txt	s_cerevisiae_filtered_folddisco	12	--covered-node-ratio 0.75 --rmsd 2.0	Folddisco	0.052	17	result/M0097_s_cerevisiae_filtered_folddisco_Folddisco.tsv
query/M-CSA/single/M0097.txt	s_cerevisiae_filtered_folddisco	12	--covered-node-ratio 0.75 --skip-match	Folddisco_prefilter	0.014	15	result/M0097_s_cerevisiae_filtered_folddisco_Folddisco_prefilter.tsv
query/M-CSA/single/M0098.txt	s_cerevisiae_filtered_folddisco	12	--covered-node-ratio 0.75 --rmsd 2.0	Folddisco	0.146	55	result/M0098_s_cerevisiae_filtered_folddisco_Folddisco.tsv
query/M-CSA/single/M0098.txt	s_cerevisiae_filtered_folddisco	12	--covered-node-ratio 0.75 --skip-match	Folddisco_prefilter	0.019	44	result/M0098_s_cerevisiae_filtered_folddisco_Folddisco_prefilter.tsv
query/M-CSA/single/M0099.txt	s_cerevisiae_filtered_folddisco	12	--covered-node-ratio 0.75 --rmsd 2.0	Folddisco	0.048	2	result/M0099_s_cerevisiae_filtered_folddisco_Folddisco.tsv
query/M-CSA/single/M0099.txt	s_cerevisiae_filtered_folddisco	12	--covered-node-ratio 0.75 --skip-match	Folddisco_prefilter	0.018	1	result/M0099_s_cerevisiae_filtered_folddisco_Folddisco_prefilter.tsv
query/M-CSA/single/M0100.txt	s_cerevisiae_filtered_folddisco	12	--covered-node-ratio 0.75 --rmsd 2.0	Folddisco	0.067	26	result/M0100_s_cerevisiae_filtered_folddisco_Folddisco.tsv
query/M-CSA/single/M0100.txt	s_cerevisiae_filtered_folddisco	12	--covered-node-ratio 0.75 --skip-match	Folddisco_prefilter	0.024	17	result/M0100_s_cerevisiae_filtered_folddisco_Folddisco_prefilter.tsv
query/M-CSA/single/M0101.txt	s_cerevisiae_filtered_folddisco	12	--covered-node-ratio 0.75 --rmsd 2.0	Folddisco	0.032	8	result/M0101_s_cerevisiae_filtered_folddisco_Folddisco.tsv
query/M-CSA/single/M0101.txt	s_cerevisiae_filtered_folddisco	12	--covered-node-ratio 0.75 --skip-match	Folddisco_prefilter	0.013	7	result/M0101_s_cerevisiae_filtered_folddisco_Folddisco_prefilter.tsv
query/M-CSA/single/M0102.txt	s_cerevisiae_filtered_folddisco	12	--covered-node-ratio 0.75 --rmsd 2.0	Folddisco	0.026	1	result/M0102_s_cerevisiae_filtered_folddisco_Folddisco.tsv
query/M-CSA/single/M0102.txt	s_cerevisiae_filtered_folddisco	12	--covered-node-ratio 0.75 --skip-match	Folddisco_prefilter	0.014	1	result/M0102_s_cerevisiae_filtered_folddisco_Folddisco_prefilter.tsv
query/M-CSA/single/M0103.txt	s_cerevisiae_filtered_folddisco	12	--covered-node-ratio 0.75 --rmsd 2.0	Folddisco	0.051	14	result/M0103_s_cerevisiae_filtered_folddisco_Folddisco.tsv
query/M-CSA/single/M0103.txt	s_cerevisiae_filtered_folddisco	12	--covered-node-ratio 0.75 --skip-match	Folddisco_prefilter	0.017	8	result/M0103_s_cerevisiae_filtered_folddisco_Folddisco_prefilter.tsv
query/M-CSA/single/M0104.txt	s_cerevisiae_filtered_folddisco	12	--covered-node-ratio 0.75 --rmsd 2.0	Folddisco	0.036	3	result/M0104_s_cerevisiae_filtered_folddisco_Folddisco.tsv
query/M-CSA/single/M0104.txt	s_cerevisiae_filtered_folddisco	12	--covered-node-ratio 0.75 --skip-match	Folddisco_prefilter	0.017	1	result/M0104_s_cerevisiae_filtered_folddisco_Folddisco_prefilter.tsv
query/M-CSA/single/M0106.txt	s_cerevisiae_filtered_folddisco	12	--covered-node-ratio 0.75 --rmsd 2.0	Folddisco	0.041	4	result/M0106_s_cerevisiae_filtered_folddisco_Folddisco.tsv
query/M-CSA/single/M0106.txt	s_cerevisiae_filtered_folddisco	12	--covered-node-ratio 0.75 --skip-match	Folddisco_prefilter	0.026	2	result/M0106_s_cerevisiae_filtered_folddisco_Folddisco_prefilter.tsv
query/M-CSA/single/M0107.txt	s_cerevisiae_filtered_folddisco	12	--covered-node-ratio 0.75 --rmsd 2.0	Folddisco	0.075	12	result/M0107_s_cerevisiae_filtered_folddisco_Folddisco.tsv
query/M-CSA/single/M0107.txt	s_cerevisiae_filtered_folddisco	12	--covered-node-ratio 0.75 --skip-match	Folddisco_prefilter	0.028	8	result/M0107_s_cerevisiae_filtered_folddisco_Folddisco_prefilter.tsv
query/M-CSA/single/M0108.txt	s_cerevisiae_filtered_folddisco	12	--covered-node-ratio 0.75 --rmsd 2.0	Folddisco	0.066	17	result/M0108_s_cerevisiae_filtered_folddisco_Folddisco.tsv
query/M-CSA/single/M0108.txt	s_cerevisiae_filtered_folddisco	12	--covered-node-ratio 0.75 --skip-match	Folddisco_prefilter	0.016	9	result/M0108_s_cerevisiae_filtered_folddisco_Folddisco_prefilter.tsv
query/M-CSA/single/M0109.txt	s_cerevisiae_filtered_folddisco	12	--covered-node-ratio 0.75 --rmsd 2.0	Folddisco	0.226	43	result/M0109_s_cerevisiae_filtered_folddisco_Folddisco.tsv
query/M-CSA/single/M0109.txt	s_cerevisiae_filtered_folddisco	12	--covered-node-ratio 0.75 --skip-match	Folddisco_prefilter	0.021	97	result/M0109_s_cerevisiae_filtered_folddisco_Folddisco_prefilter.tsv
query/M-CSA/single/M0110.txt	s_cerevisiae_filtered_folddisco	12	--covered-node-ratio 0.75 --rmsd 2.0	Folddisco	0.04	7	result/M0110_s_cerevisiae_filtered_folddisco_Folddisco.tsv
query/M-CSA/single/M0110.txt	s_cerevisiae_filtered_folddisco	12	--covered-node-ratio 0.75 --skip-match	Folddisco_prefilter	0.016	3	result/M0110_s_cerevisiae_filtered_folddisco_Folddisco_prefilter.tsv
query/M-CSA/single/M0111.txt	s_cerevisiae_filtered_folddisco	12	--covered-node-ratio 0.75 --rmsd 2.0	Folddisco	0.084	4	result/M0111_s_cerevisiae_filtered_folddisco_Folddisco.tsv
query/M-CSA/single/M0111.txt	s_cerevisiae_filtered_folddisco	12	--covered-node-ratio 0.75 --skip-match	Folddisco_prefilter	0.027	1	result/M0111_s_cerevisiae_filtered_folddisco_Folddisco_prefilter.tsv
[truncated: 8,670 more rows]

## Sheet: Supplementary Table 3
Supplementary Table 3. Search runtimes for M-CSA queries across diverse databases using pyScoMotif
query_structure	index	query_residues	tool	num_threads	runtime	num_results	result_path
query/M-CSA/pdb/1b73.pdb	e_coli_pyscomotif	A7,A8,A70,A147,A178,A180	pyScoMotif	12	4.376	0	result/mcsa_pyscomotif_results/1b73_e_coli_pyscomotif_pyscomotif.csv
query/M-CSA/pdb/1btl.pdb	e_coli_pyscomotif	A70,A73,A130,A166,A234,A237	pyScoMotif	12	4.198	0	result/mcsa_pyscomotif_results/1btl_e_coli_pyscomotif_pyscomotif.csv
query/M-CSA/pdb/1d4a.pdb	e_coli_pyscomotif	A149,A155,A161	pyScoMotif	12	4.296	21	result/mcsa_pyscomotif_results/1d4a_e_coli_pyscomotif_pyscomotif.csv
query/M-CSA/pdb/1nia.pdb	e_coli_pyscomotif	A95,A98,A100,A135,A136,A145,A150,B255,B279,B280,B306	pyScoMotif	12	5.473	0	result/mcsa_pyscomotif_results/1nia_e_coli_pyscomotif_pyscomotif.csv
query/M-CSA/pdb/1whs.pdb	e_coli_pyscomotif	A53,A146,A147,B338,B397	pyScoMotif	12	4.529	0	result/mcsa_pyscomotif_results/1whs_e_coli_pyscomotif_pyscomotif.csv
query/M-CSA/pdb/2gh5.pdb	e_coli_pyscomotif	A58,A63,A66,A197,A201,B467,B472	pyScoMotif	12	4.34	0	result/mcsa_pyscomotif_results/2gh5_e_coli_pyscomotif_pyscomotif.csv
query/M-CSA/pdb/5icd.pdb	e_coli_pyscomotif	A160,A230,A283,A307	pyScoMotif	12	3.99	3	result/mcsa_pyscomotif_results/5icd_e_coli_pyscomotif_pyscomotif.csv
query/M-CSA/pdb/1qpr.pdb	e_coli_pyscomotif	A140,A172,A201,A222,B105	pyScoMotif	12	4.796	0	result/mcsa_pyscomotif_results/1qpr_e_coli_pyscomotif_pyscomotif.csv
query/M-CSA/pdb/5a1i.pdb	e_coli_pyscomotif	A29,A31,A32,A57,A70,A181,A250,A258,A259,A264,A265,A285,A289,A291	pyScoMotif	12	5.573	0	result/mcsa_pyscomotif_results/5a1i_e_coli_pyscomotif_pyscomotif.csv
query/M-CSA/pdb/1mkb.pdb	e_coli_pyscomotif	A70,A76,A79,A80,B84	pyScoMotif	12	4.921	0	result/mcsa_pyscomotif_results/1mkb_e_coli_pyscomotif_pyscomotif.csv
query/M-CSA/pdb/1qum.pdb	e_coli_pyscomotif	D37,D69,D72,D109,D145,D179,D182,D216,D229,D231,D261	pyScoMotif	12	0.667	0	result/mcsa_pyscomotif_results/1qum_e_coli_pyscomotif_pyscomotif.csv
query/M-CSA/pdb/1oth.pdb	e_coli_pyscomotif	A141,A168,A171,A263,A303,A330	pyScoMotif	12	4.893	2	result/mcsa_pyscomotif_results/1oth_e_coli_pyscomotif_pyscomotif.csv
query/M-CSA/pdb/2bbk.pdb	e_coli_pyscomotif	A66,B32,B76,B108,B119,B122	pyScoMotif	12	0.717	0	result/mcsa_pyscomotif_results/2bbk_e_coli_pyscomotif_pyscomotif.csv
query/M-CSA/pdb/1vnc.pdb	e_coli_pyscomotif	A353,A360,A402,A403,A404,A490,A496	pyScoMotif	12	4.908	1	result/mcsa_pyscomotif_results/1vnc_e_coli_pyscomotif_pyscomotif.csv
query/M-CSA/pdb/1znb.pdb	e_coli_pyscomotif	A99,A101,A103,A162,A181,A184,A193,A223	pyScoMotif	12	4.581	0	result/mcsa_pyscomotif_results/1znb_e_coli_pyscomotif_pyscomotif.csv
query/M-CSA/pdb/1bc2.pdb	e_coli_pyscomotif	A86,A88,A90,A149,A180	pyScoMotif	12	4.373	0	result/mcsa_pyscomotif_results/1bc2_e_coli_pyscomotif_pyscomotif.csv
query/M-CSA/pdb/1ula.pdb	e_coli_pyscomotif	A86,A89,A243	pyScoMotif	12	3.975	0	result/mcsa_pyscomotif_results/1ula_e_coli_pyscomotif_pyscomotif.csv
query/M-CSA/pdb/1jdw.pdb	e_coli_pyscomotif	A170,A254,A303,A305,A407	pyScoMotif	12	4.588	0	result/mcsa_pyscomotif_results/1jdw_e_coli_pyscomotif_pyscomotif.csv
query/M-CSA/pdb/1x9d.pdb	e_coli_pyscomotif	A330,A334,A463,A599	pyScoMotif	12	4.115	0	result/mcsa_pyscomotif_results/1x9d_e_coli_pyscomotif_pyscomotif.csv
query/M-CSA/pdb/1qjd.pdb	e_coli_pyscomotif	A365,A378,A381,A402,A504,A505,A544	pyScoMotif	12	4.721	0	result/mcsa_pyscomotif_results/1qjd_e_coli_pyscomotif_pyscomotif.csv
query/M-CSA/pdb/1do8.pdb	e_coli_pyscomotif	A112,A165,A183,A255,A256,A278,A279,A421	pyScoMotif	12	5.007	0	result/mcsa_pyscomotif_results/1do8_e_coli_pyscomotif_pyscomotif.csv
query/M-CSA/pdb/1b6b.pdb	e_coli_pyscomotif	A97,A111,A122,A124,A168	pyScoMotif	12	4.292	0	result/mcsa_pyscomotif_results/1b6b_e_coli_pyscomotif_pyscomotif.csv
query/M-CSA/pdb/1xva.pdb	e_coli_pyscomotif	A21,A137,A142,A175,A194	pyScoMotif	12	4.064	0	result/mcsa_pyscomotif_results/1xva_e_coli_pyscomotif_pyscomotif.csv
query/M-CSA/pdb/1nzy.pdb	e_coli_pyscomotif	A64,A86,A90,A114,A137,A145	pyScoMotif	12	4.56	0	result/mcsa_pyscomotif_results/1nzy_e_coli_pyscomotif_pyscomotif.csv
query/M-CSA/pdb/1nba.pdb	e_coli_pyscomotif	A51,A144,A172,A173,A177	pyScoMotif	12	4.068	0	result/mcsa_pyscomotif_results/1nba_e_coli_pyscomotif_pyscomotif.csv
query/M-CSA/pdb/1ptd.pdb	e_coli_pyscomotif	A32,A33,A69,A82,A274	pyScoMotif	12	4.35	0	result/mcsa_pyscomotif_results/1ptd_e_coli_pyscomotif_pyscomotif.csv
query/M-CSA/pdb/1ah7.pdb	e_coli_pyscomotif	A14,A55,A69,A118,A122,A128,A142,A146	pyScoMotif	12	4.805	0	result/mcsa_pyscomotif_results/1ah7_e_coli_pyscomotif_pyscomotif.csv
query/M-CSA/pdb/1djx.pdb	e_coli_pyscomotif	A311,A312,A341,A343,A356,A390	pyScoMotif	12	4.418	0	result/mcsa_pyscomotif_results/1djx_e_coli_pyscomotif_pyscomotif.csv
query/M-CSA/pdb/1djo.pdb	e_coli_pyscomotif	A1020,A1034,A1100,A1101,A1173,B3294	pyScoMotif	12	4.297	0	result/mcsa_pyscomotif_results/1djo_e_coli_pyscomotif_pyscomotif.csv
query/M-CSA/pdb/2pfl.pdb	e_coli_pyscomotif	A333,A418,A419,A734	pyScoMotif	12	4.436	2	result/mcsa_pyscomotif_results/2pfl_e_coli_pyscomotif_pyscomotif.csv
query/M-CSA/pdb/1lcb.pdb	e_coli_pyscomotif	A60,A82,A146,A198,A218,A221	pyScoMotif	12	4.715	1	result/mcsa_pyscomotif_results/1lcb_e_coli_pyscomotif_pyscomotif.csv
query/M-CSA/pdb/1qin.pdb	e_coli_pyscomotif	A33,A99,B126,B172	pyScoMotif	12	3.869	1	result/mcsa_pyscomotif_results/1qin_e_coli_pyscomotif_pyscomotif.csv
query/M-CSA/pdb/1jc5.pdb	e_coli_pyscomotif	A12,A48,A65,A91,A141	pyScoMotif	12	4.423	0	result/mcsa_pyscomotif_results/1jc5_e_coli_pyscomotif_pyscomotif.csv
query/M-CSA/pdb/1mpy.pdb	e_coli_pyscomotif	A153,A199,A214,A246,A255,A265	pyScoMotif	12	4.317	0	result/mcsa_pyscomotif_results/1mpy_e_coli_pyscomotif_pyscomotif.csv
query/M-CSA/pdb/2phk.pdb	e_coli_pyscomotif	A149,A151,A154,A167,A186	pyScoMotif	12	4.102	0	result/mcsa_pyscomotif_results/2phk_e_coli_pyscomotif_pyscomotif.csv
query/M-CSA/pdb/1qq5.pdb	e_coli_pyscomotif	A8,A12,A39,A114,A115,A147,A171,A173,A175,A176	pyScoMotif	12	4.859	0	result/mcsa_pyscomotif_results/1qq5_e_coli_pyscomotif_pyscomotif.csv
query/M-CSA/pdb/5cox.pdb	e_coli_pyscomotif	A203,A207,A384,A385,A388,A526,A530	pyScoMotif	12	4.816	0	result/mcsa_pyscomotif_results/5cox_e_coli_pyscomotif_pyscomotif.csv
query/M-CSA/pdb/1fbx.pdb	e_coli_pyscomotif	A110,A111,A112,A113,A151,A179,A181	pyScoMotif	12	5.381	1	result/mcsa_pyscomotif_results/1fbx_e_coli_pyscomotif_pyscomotif.csv
query/M-CSA/pdb/2mas.pdb	e_coli_pyscomotif	A10,A15,A39,A126,A167,A168,A241,A242	pyScoMotif	12	5.304	1	result/mcsa_pyscomotif_results/2mas_e_coli_pyscomotif_pyscomotif.csv
query/M-CSA/pdb/13pk.pdb	e_coli_pyscomotif	A39,A219,A376,A399	pyScoMotif	12	4.431	0	result/mcsa_pyscomotif_results/13pk_e_coli_pyscomotif_pyscomotif.csv
query/M-CSA/pdb/1dnk.pdb	e_coli_pyscomotif	C39,C76,C78,C134,C168,C212,C252	pyScoMotif	12	0.638	0	result/mcsa_pyscomotif_results/1dnk_e_coli_pyscomotif_pyscomotif.csv
query/M-CSA/pdb/1ql0.pdb	e_coli_pyscomotif	A57,A89,A110,A119,A127	pyScoMotif	12	4.615	0	result/mcsa_pyscomotif_results/1ql0_e_coli_pyscomotif_pyscomotif.csv
query/M-CSA/pdb/4kbp.pdb	e_coli_pyscomotif	A135,A164,A167,A201,A202,A286,A295,A296,A323,A325	pyScoMotif	12	5.123	0	result/mcsa_pyscomotif_results/4kbp_e_coli_pyscomotif_pyscomotif.csv
query/M-CSA/pdb/1alk.pdb	e_coli_pyscomotif	A51,A102,A153,A155,A166,A322,A327,A328,A331,A369,A370,A412	pyScoMotif	12	5.246	1	result/mcsa_pyscomotif_results/1alk_e_coli_pyscomotif_pyscomotif.csv
query/M-CSA/pdb/1cdg.pdb	e_coli_pyscomotif	A227,A229,A257,A327,A328	pyScoMotif	12	4.282	3	result/mcsa_pyscomotif_results/1cdg_e_coli_pyscomotif_pyscomotif.csv
query/M-CSA/pdb/2adm.pdb	e_coli_pyscomotif	A105,A106,A108,A196	pyScoMotif	12	4.328	0	result/mcsa_pyscomotif_results/2adm_e_coli_pyscomotif_pyscomotif.csv
query/M-CSA/pdb/1ytw.pdb	e_coli_pyscomotif	A290,A354,A356,A402,A403,A409,A410	pyScoMotif	12	4.453	0	result/mcsa_pyscomotif_results/1ytw_e_coli_pyscomotif_pyscomotif.csv
query/M-CSA/pdb/1bzy.pdb	e_coli_pyscomotif	A133,A134,A137,A186,A199	pyScoMotif	12	4.322	0	result/mcsa_pyscomotif_results/1bzy_e_coli_pyscomotif_pyscomotif.csv
query/M-CSA/pdb/1pya.pdb	e_coli_pyscomotif	A62,A63,A66,E81,F82,F195,F197	pyScoMotif	12	0.764	0	result/mcsa_pyscomotif_results/1pya_e_coli_pyscomotif_pyscomotif.csv
query/M-CSA/pdb/1dbt.pdb	e_coli_pyscomotif	A33,A60,A62,A123,A215,B65	pyScoMotif	12	4.567	0	result/mcsa_pyscomotif_results/1dbt_e_coli_pyscomotif_pyscomotif.csv
query/M-CSA/pdb/1aq2.pdb	e_coli_pyscomotif	A65,A213,A232,A250,A254,A255,A269,A333	pyScoMotif	12	4.588	0	result/mcsa_pyscomotif_results/1aq2_e_coli_pyscomotif_pyscomotif.csv
query/M-CSA/pdb/1b57.pdb	e_coli_pyscomotif	A109,A110,A182,A226,A264,A286	pyScoMotif	12	3.965	0	result/mcsa_pyscomotif_results/1b57_e_coli_pyscomotif_pyscomotif.csv
query/M-CSA/pdb/1d8c.pdb	e_coli_pyscomotif	A270,A272,A338,A427,A455,A631	pyScoMotif	12	4.673	3	result/mcsa_pyscomotif_results/1d8c_e_coli_pyscomotif_pyscomotif.csv
query/M-CSA/pdb/1qfe.pdb	e_coli_pyscomotif	A86,A143,A170	pyScoMotif	12	3.836	1	result/mcsa_pyscomotif_results/1qfe_e_coli_pyscomotif_pyscomotif.csv
query/M-CSA/pdb/1gu1.pdb	e_coli_pyscomotif	A15,A16,A23,A28,A79,A82,A104,A106,A113	pyScoMotif	12	5.392	0	result/mcsa_pyscomotif_results/1gu1_e_coli_pyscomotif_pyscomotif.csv
query/M-CSA/pdb/1ze1.pdb	e_coli_pyscomotif	A39,A67,A81,A172	pyScoMotif	12	4.629	1	result/mcsa_pyscomotif_results/1ze1_e_coli_pyscomotif_pyscomotif.csv
query/M-CSA/pdb/2ahj.pdb	e_coli_pyscomotif	A109,A112,A113,A114,B56,B72,B76	pyScoMotif	12	0.703	0	result/mcsa_pyscomotif_results/2ahj_e_coli_pyscomotif_pyscomotif.csv
query/M-CSA/pdb/1cju.pdb	e_coli_pyscomotif	A396,A397,A440,B1029,B1065	pyScoMotif	12	4.063	0	result/mcsa_pyscomotif_results/1cju_e_coli_pyscomotif_pyscomotif.csv
query/M-CSA/pdb/1dqs.pdb	e_coli_pyscomotif	A152,A194,A250,A260,A264,A268,A271,A275,A287,B130	pyScoMotif	12	5.198	0	result/mcsa_pyscomotif_results/1dqs_e_coli_pyscomotif_pyscomotif.csv
query/M-CSA/pdb/1dea.pdb	e_coli_pyscomotif	A72,A141,A143,A148	pyScoMotif	12	3.859	1	result/mcsa_pyscomotif_results/1dea_e_coli_pyscomotif_pyscomotif.csv
query/M-CSA/pdb/1bjp.pdb	e_coli_pyscomotif	A1,A11,A50,B39	pyScoMotif	12	4.184	0	result/mcsa_pyscomotif_results/1bjp_e_coli_pyscomotif_pyscomotif.csv
query/M-CSA/pdb/1req.pdb	e_coli_pyscomotif	A89,A243,A244,A604,A608,A610	pyScoMotif	12	5.485	1	result/mcsa_pyscomotif_results/1req_e_coli_pyscomotif_pyscomotif.csv
query/M-CSA/pdb/1cb7.pdb	e_coli_pyscomotif	A14,A16,B100,B171	pyScoMotif	12	4.19	0	result/mcsa_pyscomotif_results/1cb7_e_coli_pyscomotif_pyscomotif.csv
query/M-CSA/pdb/1d6m.pdb	e_coli_pyscomotif	A7,A8,A103,A105,A328,A330	pyScoMotif	12	4.565	0	result/mcsa_pyscomotif_results/1d6m_e_coli_pyscomotif_pyscomotif.csv
query/M-CSA/pdb/1gim.pdb	e_coli_pyscomotif	A13,A16,A40,A41,A224	pyScoMotif	12	4.711	1	result/mcsa_pyscomotif_results/1gim_e_coli_pyscomotif_pyscomotif.csv
query/M-CSA/pdb/1daa.pdb	e_coli_pyscomotif	A31,A145,A177,A201	pyScoMotif	12	4.186	0	result/mcsa_pyscomotif_results/1daa_e_coli_pyscomotif_pyscomotif.csv
query/M-CSA/pdb/1pjb.pdb	e_coli_pyscomotif	A15,A74,A93,A95,A117,A269	pyScoMotif	12	4.409	0	result/mcsa_pyscomotif_results/1pjb_e_coli_pyscomotif_pyscomotif.csv
query/M-CSA/pdb/1ivh.pdb	e_coli_pyscomotif	A135,A136,A254,A387	pyScoMotif	12	4.065	0	result/mcsa_pyscomotif_results/1ivh_e_coli_pyscomotif_pyscomotif.csv
query/M-CSA/pdb/1lxa.pdb	e_coli_pyscomotif	A125,A126,A143	pyScoMotif	12	4.058	17	result/mcsa_pyscomotif_results/1lxa_e_coli_pyscomotif_pyscomotif.csv
query/M-CSA/pdb/1ef8.pdb	e_coli_pyscomotif	A66,A110,A140	pyScoMotif	12	4.365	19	result/mcsa_pyscomotif_results/1ef8_e_coli_pyscomotif_pyscomotif.csv
query/M-CSA/pdb/1eug.pdb	e_coli_pyscomotif	A64,A66,A77,A187	pyScoMotif	12	3.972	0	result/mcsa_pyscomotif_results/1eug_e_coli_pyscomotif_pyscomotif.csv
query/M-CSA/pdb/2fua.pdb	e_coli_pyscomotif	A73,A92,A94,A113,A155,A209	pyScoMotif	12	3.878	0	result/mcsa_pyscomotif_results/2fua_e_coli_pyscomotif_pyscomotif.csv
query/M-CSA/pdb/1dco.pdb	e_coli_pyscomotif	A58,A62,A63,A80,A81,A89	pyScoMotif	12	4.283	0	result/mcsa_pyscomotif_results/1dco_e_coli_pyscomotif_pyscomotif.csv
query/M-CSA/pdb/1bs1.pdb	e_coli_pyscomotif	A11,A12,A15,A16,A37,A41,A54,A115	pyScoMotif	12	4.748	1	result/mcsa_pyscomotif_results/1bs1_e_coli_pyscomotif_pyscomotif.csv
query/M-CSA/pdb/12as.pdb	e_coli_pyscomotif	A46,A100,A116,A235,A248,A251	pyScoMotif	12	4.439	1	result/mcsa_pyscomotif_results/12as_e_coli_pyscomotif_pyscomotif.csv
query/M-CSA/pdb/1a26.pdb	e_coli_pyscomotif	A904,A907,A988	pyScoMotif	12	4.29	12	result/mcsa_pyscomotif_results/1a26_e_coli_pyscomotif_pyscomotif.csv
query/M-CSA/pdb/1afw.pdb	e_coli_pyscomotif	A125,A375,A403,A405	pyScoMotif	12	3.962	4	result/mcsa_pyscomotif_results/1afw_e_coli_pyscomotif_pyscomotif.csv
query/M-CSA/pdb/1al6.pdb	e_coli_pyscomotif	A244,A274,A320,A329,A375	pyScoMotif	12	4.806	1	result/mcsa_pyscomotif_results/1al6_e_coli_pyscomotif_pyscomotif.csv
query/M-CSA/pdb/1c3c.pdb	e_coli_pyscomotif	A140,A141,A263,B68,B268,B275	pyScoMotif	12	3.957	0	result/mcsa_pyscomotif_results/1c3c_e_coli_pyscomotif_pyscomotif.csv
query/M-CSA/pdb/3csm.pdb	e_coli_pyscomotif	A16,A157,A168,A194,A198,A242,A246	pyScoMotif	12	4.52	0	result/mcsa_pyscomotif_results/3csm_e_coli_pyscomotif_pyscomotif.csv
query/M-CSA/pdb/1jxa.pdb	e_coli_pyscomotif	A1,A26,A74,A98,A99,A481,A485,A488,A504,A603	pyScoMotif	12	5.343	0	result/mcsa_pyscomotif_results/1jxa_e_coli_pyscomotif_pyscomotif.csv
query/M-CSA/pdb/1l8s.pdb	e_coli_pyscomotif	A28,A30,A32,A48,A49,A52,A73,A99	pyScoMotif	12	4.393	0	result/mcsa_pyscomotif_results/1l8s_e_coli_pyscomotif_pyscomotif.csv
query/M-CSA/pdb/1b66.pdb	e_coli_pyscomotif	A23,A42,A48,A50,A133,B88,B89	pyScoMotif	12	4.473	0	result/mcsa_pyscomotif_results/1b66_e_coli_pyscomotif_pyscomotif.csv
query/M-CSA/pdb/1b93.pdb	e_coli_pyscomotif	A19,A66,A71,A91,A98,A101,C107	pyScoMotif	12	4.296	0	result/mcsa_pyscomotif_results/1b93_e_coli_pyscomotif_pyscomotif.csv
query/M-CSA/pdb/1bg0.pdb	e_coli_pyscomotif	A126,A225,A229,A271,A273,A280,A309,A314	pyScoMotif	12	4.624	0	result/mcsa_pyscomotif_results/1bg0_e_coli_pyscomotif_pyscomotif.csv
query/M-CSA/pdb/1fwj.pdb	e_coli_pyscomotif	C134,C136,C217,C219,C221,C246,C272,C320,C336,C360	pyScoMotif	12	0.696	0	result/mcsa_pyscomotif_results/1fwj_e_coli_pyscomotif_pyscomotif.csv
query/M-CSA/pdb/1hxq.pdb	e_coli_pyscomotif	A52,A55,A115,A153,A161,A164,A166,A168	pyScoMotif	12	5.176	1	result/mcsa_pyscomotif_results/1hxq_e_coli_pyscomotif_pyscomotif.csv
query/M-CSA/pdb/1ps1.pdb	e_coli_pyscomotif	A76,A77,A80,A84,A157,A173,A219,A223,A226,A227,A230,A308,A309	pyScoMotif	12	5.37	0	result/mcsa_pyscomotif_results/1ps1_e_coli_pyscomotif_pyscomotif.csv
query/M-CSA/pdb/1b3r.pdb	e_coli_pyscomotif	A54,A77,A82,A130,A155,A180,A185,A189,A190,A194,A300,A352,A360,A364	pyScoMotif	12	5.685	0	result/mcsa_pyscomotif_results/1b3r_e_coli_pyscomotif_pyscomotif.csv
query/M-CSA/pdb/1brw.pdb	e_coli_pyscomotif	A82,A161,A168,A183,A187	pyScoMotif	12	4.881	1	result/mcsa_pyscomotif_results/1brw_e_coli_pyscomotif_pyscomotif.csv
query/M-CSA/pdb/1dli.pdb	e_coli_pyscomotif	A118,A145,A204,A208,A260,A264	pyScoMotif	12	4.793	1	result/mcsa_pyscomotif_results/1dli_e_coli_pyscomotif_pyscomotif.csv
query/M-CSA/pdb/1dqa.pdb	e_coli_pyscomotif	A691,A767,B559,B866	pyScoMotif	12	4.277	2	result/mcsa_pyscomotif_results/1dqa_e_coli_pyscomotif_pyscomotif.csv
query/M-CSA/pdb/1bwp.pdb	e_coli_pyscomotif	A47,A74,A104,A192,A195	pyScoMotif	12	4.379	1	result/mcsa_pyscomotif_results/1bwp_e_coli_pyscomotif_pyscomotif.csv
query/M-CSA/pdb/1fui.pdb	e_coli_pyscomotif	A337,A361,A528	pyScoMotif	12	4.816	20	result/mcsa_pyscomotif_results/1fui_e_coli_pyscomotif_pyscomotif.csv
query/M-CSA/pdb/1chm.pdb	e_coli_pyscomotif	A232,A262,A358	pyScoMotif	12	4.324	5	result/mcsa_pyscomotif_results/1chm_e_coli_pyscomotif_pyscomotif.csv
query/M-CSA/pdb/1ctt.pdb	e_coli_pyscomotif	A102,A104,A129,A132	pyScoMotif	12	3.872	7	result/mcsa_pyscomotif_results/1ctt_e_coli_pyscomotif_pyscomotif.csv
query/M-CSA/pdb/1bsz.pdb	e_coli_pyscomotif	A45,A50,A90,A91,A132,A133,A136	pyScoMotif	12	4.928	1	result/mcsa_pyscomotif_results/1bsz_e_coli_pyscomotif_pyscomotif.csv
query/M-CSA/pdb/1g72.pdb	e_coli_pyscomotif	A171,A255,A297	pyScoMotif	12	4.442	16	result/mcsa_pyscomotif_results/1g72_e_coli_pyscomotif_pyscomotif.csv
query/M-CSA/pdb/1a4s.pdb	e_coli_pyscomotif	A166,A263,A297,A477	pyScoMotif	12	4.752	3	result/mcsa_pyscomotif_results/1a4s_e_coli_pyscomotif_pyscomotif.csv
query/M-CSA/pdb/5fit.pdb	e_coli_pyscomotif	A83,A94,A96,A98	pyScoMotif	12	4.127	0	result/mcsa_pyscomotif_results/5fit_e_coli_pyscomotif_pyscomotif.csv
query/M-CSA/pdb/1fcb.pdb	e_coli_pyscomotif	A254,A282,A373	pyScoMotif	12	4.093	4	result/mcsa_pyscomotif_results/1fcb_e_coli_pyscomotif_pyscomotif.csv
query/M-CSA/pdb/1vao.pdb	e_coli_pyscomotif	A108,A170,A422,A503,A504	pyScoMotif	12	4.909	0	result/mcsa_pyscomotif_results/1vao_e_coli_pyscomotif_pyscomotif.csv
query/M-CSA/pdb/1c9u.pdb	e_coli_pyscomotif	A144,A163,A228,A269,A271,A273,A309	pyScoMotif	12	4.693	0	result/mcsa_pyscomotif_results/1c9u_e_coli_pyscomotif_pyscomotif.csv
query/M-CSA/pdb/1w85.pdb	e_coli_pyscomotif	B59,B128,C267,C271,C281	pyScoMotif	12	4.927	0	result/mcsa_pyscomotif_results/1w85_e_coli_pyscomotif_pyscomotif.csv
query/M-CSA/pdb/1n62.pdb	e_coli_pyscomotif	B240,B387,B388,B763	pyScoMotif	12	5.549	0	result/mcsa_pyscomotif_results/1n62_e_coli_pyscomotif_pyscomotif.csv
query/M-CSA/pdb/1ps9.pdb	e_coli_pyscomotif	A164,A166,A214,A252,A339	pyScoMotif	12	4.158	0	result/mcsa_pyscomotif_results/1ps9_e_coli_pyscomotif_pyscomotif.csv
query/M-CSA/pdb/1d3g.pdb	e_coli_pyscomotif	A145,A149,A215,A217,A218,A255,A284	pyScoMotif	12	4.811	1	result/mcsa_pyscomotif_results/1d3g_e_coli_pyscomotif_pyscomotif.csv
query/M-CSA/pdb/1c0p.pdb	e_coli_pyscomotif	A1054,A1335,A1339	pyScoMotif	12	4.049	25	result/mcsa_pyscomotif_results/1c0p_e_coli_pyscomotif_pyscomotif.csv
query/M-CSA/pdb/1ofd.pdb	e_coli_pyscomotif	A1,A31,A207,A227,A228,A903,A969,A972,A978	pyScoMotif	12	5.313	0	result/mcsa_pyscomotif_results/1ofd_e_coli_pyscomotif_pyscomotif.csv
query/M-CSA/pdb/3dfr.pdb	e_coli_pyscomotif	A4,A19,A21,A26,A27,A30,A54,A94,A116	pyScoMotif	12	4.609	0	result/mcsa_pyscomotif_results/3dfr_e_coli_pyscomotif_pyscomotif.csv
query/M-CSA/pdb/2gb0.pdb	e_coli_pyscomotif	A45,A48,A49,A265,A269,A315,A348	pyScoMotif	12	4.72	1	result/mcsa_pyscomotif_results/2gb0_e_coli_pyscomotif_pyscomotif.csv
query/M-CSA/pdb/2tmd.pdb	e_coli_pyscomotif	A30,A169,A172,A267	pyScoMotif	12	4.256	0	result/mcsa_pyscomotif_results/2tmd_e_coli_pyscomotif_pyscomotif.csv
query/M-CSA/pdb/1w1o.pdb	e_coli_pyscomotif	A105,A169,A288	pyScoMotif	12	3.848	1	result/mcsa_pyscomotif_results/1w1o_e_coli_pyscomotif_pyscomotif.csv
query/M-CSA/pdb/1hzz.pdb	e_coli_pyscomotif	A127,A132,A135,A138,A235,C132	pyScoMotif	12	4.432	0	result/mcsa_pyscomotif_results/1hzz_e_coli_pyscomotif_pyscomotif.csv
query/M-CSA/pdb/1amo.pdb	e_coli_pyscomotif	A457,A630,A675,A677	pyScoMotif	12	4.649	0	result/mcsa_pyscomotif_results/1amo_e_coli_pyscomotif_pyscomotif.csv
query/M-CSA/pdb/1wrr.pdb	e_coli_pyscomotif	A10,A57,A176,A228,A256	pyScoMotif	12	3.888	0	result/mcsa_pyscomotif_results/1wrr_e_coli_pyscomotif_pyscomotif.csv
query/M-CSA/pdb/2c3m.pdb	e_coli_pyscomotif	A31,A64,A114,A996	pyScoMotif	12	4.872	1	result/mcsa_pyscomotif_results/2c3m_e_coli_pyscomotif_pyscomotif.csv
query/M-CSA/pdb/1zp3.pdb	e_coli_pyscomotif	A26,A28,A120,A223,A273	pyScoMotif	12	4.687	1	result/mcsa_pyscomotif_results/1zp3_e_coli_pyscomotif_pyscomotif.csv
query/M-CSA/pdb/1sox.pdb	e_coli_pyscomotif	A40,A65,A138,A185,A322	pyScoMotif	12	3.796	0	result/mcsa_pyscomotif_results/1sox_e_coli_pyscomotif_pyscomotif.csv
query/M-CSA/pdb/1fva.pdb	e_coli_pyscomotif	A72,A103,A115,A150,A155,A218,A227	pyScoMotif	12	4.402	0	result/mcsa_pyscomotif_results/1fva_e_coli_pyscomotif_pyscomotif.csv
query/M-CSA/pdb/1jnr.pdb	e_coli_pyscomotif	A74,A141,A234,A265,A361,A398,A449,B48	pyScoMotif	12	4.954	0	result/mcsa_pyscomotif_results/1jnr_e_coli_pyscomotif_pyscomotif.csv
query/M-CSA/pdb/1v54.pdb	e_coli_pyscomotif	A61,A91,A126,A156,A157,A240,A242,A244,A255,A290,A291,A316,A319,A438	pyScoMotif	12	6.564	0	result/mcsa_pyscomotif_results/1v54_e_coli_pyscomotif_pyscomotif.csv
query/M-CSA/pdb/1bt3.pdb	e_coli_pyscomotif	A88,A109,A118,A240,A244,A261,A274	pyScoMotif	12	4.662	0	result/mcsa_pyscomotif_results/1bt3_e_coli_pyscomotif_pyscomotif.csv
query/M-CSA/pdb/2frv.pdb	e_coli_pyscomotif	B18,B65,B68,B72,B463,B486,B530,B533	pyScoMotif	12	6.169	1	result/mcsa_pyscomotif_results/2frv_e_coli_pyscomotif_pyscomotif.csv
query/M-CSA/pdb/1hfe.pdb	e_coli_pyscomotif	B156,B159,B178,B198,B237,B240,B245,B382	pyScoMotif	12	0.756	0	result/mcsa_pyscomotif_results/1hfe_e_coli_pyscomotif_pyscomotif.csv
query/M-CSA/pdb/1ba3.pdb	e_coli_pyscomotif	A218,A245,A343,A443,A529	pyScoMotif	12	4.59	0	result/mcsa_pyscomotif_results/1ba3_e_coli_pyscomotif_pyscomotif.csv
query/M-CSA/pdb/1os7.pdb	e_coli_pyscomotif	A99,A101,A255,A270	pyScoMotif	12	4.257	1	result/mcsa_pyscomotif_results/1os7_e_coli_pyscomotif_pyscomotif.csv
query/M-CSA/pdb/1ndo.pdb	e_coli_pyscomotif	A104,E205,E208,E213,E362	pyScoMotif	12	4.415	0	result/mcsa_pyscomotif_results/1ndo_e_coli_pyscomotif_pyscomotif.csv
query/M-CSA/pdb/1doc.pdb	e_coli_pyscomotif	A72,A201,A293,A297,A385	pyScoMotif	12	4.352	0	result/mcsa_pyscomotif_results/1doc_e_coli_pyscomotif_pyscomotif.csv
query/M-CSA/pdb/1yrc.pdb	e_coli_pyscomotif	A186,A251,A252,A357,A358,A359	pyScoMotif	12	4.202	0	result/mcsa_pyscomotif_results/1yrc_e_coli_pyscomotif_pyscomotif.csv
query/M-CSA/pdb/2toh.pdb	e_coli_pyscomotif	A331,A336,A376,A395	pyScoMotif	12	3.856	2	result/mcsa_pyscomotif_results/2toh_e_coli_pyscomotif_pyscomotif.csv
query/M-CSA/pdb/1sdw.pdb	e_coli_pyscomotif	A107,A108,A170,A172,A242,A244,A314	pyScoMotif	12	4.456	0	result/mcsa_pyscomotif_results/1sdw_e_coli_pyscomotif_pyscomotif.csv
query/M-CSA/pdb/1afr.pdb	e_coli_pyscomotif	A62,A105,A143,A146,A196,A199,A228,A229,A232	pyScoMotif	12	5.115	0	result/mcsa_pyscomotif_results/1afr_e_coli_pyscomotif_pyscomotif.csv
query/M-CSA/pdb/2jcw.pdb	e_coli_pyscomotif	A46,A48,A63,A71,A80,A83,A120,A143	pyScoMotif	12	4.478	1	result/mcsa_pyscomotif_results/2jcw_e_coli_pyscomotif_pyscomotif.csv
query/M-CSA/pdb/1v97.pdb	e_coli_pyscomotif	A802,A880,A1261	pyScoMotif	12	4.686	8	result/mcsa_pyscomotif_results/1v97_e_coli_pyscomotif_pyscomotif.csv
query/M-CSA/pdb/1l1l.pdb	e_coli_pyscomotif	A119,A406,A408,A410,A419,A731,A736	pyScoMotif	12	1.013	0	result/mcsa_pyscomotif_results/1l1l_e_coli_pyscomotif_pyscomotif.csv
query/M-CSA/pdb/1dii.pdb	e_coli_pyscomotif	A167,A177,A286,A367,A380,A384,A436,A473,A474,A512,C649,C650	pyScoMotif	12	5.55	0	result/mcsa_pyscomotif_results/1dii_e_coli_pyscomotif_pyscomotif.csv
query/M-CSA/pdb/1e6e.pdb	e_coli_pyscomotif	A55,A159,A376,A377	pyScoMotif	12	3.961	0	result/mcsa_pyscomotif_results/1e6e_e_coli_pyscomotif_pyscomotif.csv
query/M-CSA/pdb/1ljl.pdb	e_coli_pyscomotif	A10,A11,A12,A13,A14,A15,A16,A17,A82,A89,A105	pyScoMotif	12	4.949	0	result/mcsa_pyscomotif_results/1ljl_e_coli_pyscomotif_pyscomotif.csv
query/M-CSA/pdb/1g8k.pdb	e_coli_pyscomotif	A24,A98,A99,A238,B62,B81	pyScoMotif	12	5.356	0	result/mcsa_pyscomotif_results/1g8k_e_coli_pyscomotif_pyscomotif.csv
query/M-CSA/pdb/1odm.pdb	e_coli_pyscomotif	A211,A214,A216,A270	pyScoMotif	12	4.328	0	result/mcsa_pyscomotif_results/1odm_e_coli_pyscomotif_pyscomotif.csv
query/M-CSA/pdb/4v4e.pdb	e_coli_pyscomotif	A144,A174,A404	pyScoMotif	12	0.607	0	result/mcsa_pyscomotif_results/4v4e_e_coli_pyscomotif_pyscomotif.csv
query/M-CSA/pdb/1ls3.pdb	e_coli_pyscomotif	A57,A200,A226,A229,A235,B55	pyScoMotif	12	4.435	0	result/mcsa_pyscomotif_results/1ls3_e_coli_pyscomotif_pyscomotif.csv
query/M-CSA/pdb/1onr.pdb	e_coli_pyscomotif	A17,A96,A132,A156	pyScoMotif	12	4.038	3	result/mcsa_pyscomotif_results/1onr_e_coli_pyscomotif_pyscomotif.csv
query/M-CSA/pdb/1ggt.pdb	e_coli_pyscomotif	A279,A314,A373,A396,A560	pyScoMotif	12	4.581	0	result/mcsa_pyscomotif_results/1ggt_e_coli_pyscomotif_pyscomotif.csv
query/M-CSA/pdb/1ndp.pdb	e_coli_pyscomotif	B16,B56,B119,B122,B133	pyScoMotif	12	4.427	1	result/mcsa_pyscomotif_results/1ndp_e_coli_pyscomotif_pyscomotif.csv
query/M-CSA/pdb/1q0n.pdb	e_coli_pyscomotif	A82,A92,A95,A97	pyScoMotif	12	3.809	1	result/mcsa_pyscomotif_results/1q0n_e_coli_pyscomotif_pyscomotif.csv
query/M-CSA/pdb/1f80.pdb	e_coli_pyscomotif	A62,B105,E35	pyScoMotif	12	4.162	1	result/mcsa_pyscomotif_results/1f80_e_coli_pyscomotif_pyscomotif.csv
query/M-CSA/pdb/1rhs.pdb	e_coli_pyscomotif	A186,A247,A248,A249,A250,A251,A252,A274	pyScoMotif	12	0.653	0	result/mcsa_pyscomotif_results/1rhs_e_coli_pyscomotif_pyscomotif.csv
query/M-CSA/pdb/1hy3.pdb	e_coli_pyscomotif	A47,A107,A137	pyScoMotif	12	4.249	2	result/mcsa_pyscomotif_results/1hy3_e_coli_pyscomotif_pyscomotif.csv
query/M-CSA/pdb/1t4c.pdb	e_coli_pyscomotif	A17,A140,A169,B260,B261	pyScoMotif	12	4.686	0	result/mcsa_pyscomotif_results/1t4c_e_coli_pyscomotif_pyscomotif.csv
query/M-CSA/pdb/1mro.pdb	e_coli_pyscomotif	A147,A465,A501,E333,E367	pyScoMotif	12	4.498	0	result/mcsa_pyscomotif_results/1mro_e_coli_pyscomotif_pyscomotif.csv
query/M-CSA/pdb/1qh5.pdb	e_coli_pyscomotif	A54,A56,A58,A59,A110,A134,A173	pyScoMotif	12	4.423	3	result/mcsa_pyscomotif_results/1qh5_e_coli_pyscomotif_pyscomotif.csv
query/M-CSA/pdb/1auk.pdb	e_coli_pyscomotif	A29,A30,A69,A73,A123,A125,A150,A229,A281,A282,A302	pyScoMotif	12	0.655	0	result/mcsa_pyscomotif_results/1auk_e_coli_pyscomotif_pyscomotif.csv
query/M-CSA/pdb/1hzy.pdb	e_coli_pyscomotif	A55,A57,A169,A201,A230,A233,A254,A301	pyScoMotif	12	4.442	0	result/mcsa_pyscomotif_results/1hzy_e_coli_pyscomotif_pyscomotif.csv
query/M-CSA/pdb/1ako.pdb	e_coli_pyscomotif	A7,A34,A151,A153,A229,A258,A259	pyScoMotif	12	4.647	3	result/mcsa_pyscomotif_results/1ako_e_coli_pyscomotif_pyscomotif.csv
query/M-CSA/pdb/1en7.pdb	e_coli_pyscomotif	A41,A43,A65,B105	pyScoMotif	12	3.889	0	result/mcsa_pyscomotif_results/1en7_e_coli_pyscomotif_pyscomotif.csv
query/M-CSA/pdb/1vas.pdb	e_coli_pyscomotif	A2,A22,A23,A26	pyScoMotif	12	3.957	0	result/mcsa_pyscomotif_results/1vas_e_coli_pyscomotif_pyscomotif.csv
query/M-CSA/pdb/1rdd.pdb	e_coli_pyscomotif	A10,A11,A48,A70,A124,A134	pyScoMotif	12	4.176	0	result/mcsa_pyscomotif_results/1rdd_e_coli_pyscomotif_pyscomotif.csv
query/M-CSA/pdb/1ruv.pdb	e_coli_pyscomotif	A12,A41,A119,A120,A121	pyScoMotif	12	3.795	0	result/mcsa_pyscomotif_results/1ruv_e_coli_pyscomotif_pyscomotif.csv
query/M-CSA/pdb/2sns.pdb	e_coli_pyscomotif	A35,A43,A87	pyScoMotif	12	4.086	16	result/mcsa_pyscomotif_results/2sns_e_coli_pyscomotif_pyscomotif.csv
query/M-CSA/pdb/1hs6.pdb	e_coli_pyscomotif	A271,A295,A296,A299,A318,A375,A383	pyScoMotif	12	3.932	0	result/mcsa_pyscomotif_results/1hs6_e_coli_pyscomotif_pyscomotif.csv
query/M-CSA/pdb/1lok.pdb	e_coli_pyscomotif	A97,A117,A151,A152,A179,A256	pyScoMotif	12	4.206	6	result/mcsa_pyscomotif_results/1lok_e_coli_pyscomotif_pyscomotif.csv
query/M-CSA/pdb/1itq.pdb	e_coli_pyscomotif	A20,A22,A125,A152,A198,A219,A288	pyScoMotif	12	4.776	0	result/mcsa_pyscomotif_results/1itq_e_coli_pyscomotif_pyscomotif.csv
query/M-CSA/pdb/1pfq.pdb	e_coli_pyscomotif	A547,A630,A631,A708,A740	pyScoMotif	12	3.968	0	result/mcsa_pyscomotif_results/1pfq_e_coli_pyscomotif_pyscomotif.csv
query/M-CSA/pdb/1m4l.pdb	e_coli_pyscomotif	A69,A72,A127,A196,A270	pyScoMotif	12	4.476	2	result/mcsa_pyscomotif_results/1m4l_e_coli_pyscomotif_pyscomotif.csv
query/M-CSA/pdb/1onw.pdb	e_coli_pyscomotif	A68,A70,A162,A201,A230,A285	pyScoMotif	12	0.699	0	result/mcsa_pyscomotif_results/1onw_e_coli_pyscomotif_pyscomotif.csv
query/M-CSA/pdb/1pq5.pdb	e_coli_pyscomotif	A56,A99,A192,A193,A194,A195	pyScoMotif	12	4.154	0	result/mcsa_pyscomotif_results/1pq5_e_coli_pyscomotif_pyscomotif.csv
query/M-CSA/pdb/9pap.pdb	e_coli_pyscomotif	A19,A25,A159,A175	pyScoMotif	12	0.636	0	result/mcsa_pyscomotif_results/9pap_e_coli_pyscomotif_pyscomotif.csv
query/M-CSA/pdb/1a30.pdb	e_coli_pyscomotif	A25,A26,A27,B25,B26,B27	pyScoMotif	12	4.451	0	result/mcsa_pyscomotif_results/1a30_e_coli_pyscomotif_pyscomotif.csv
query/M-CSA/pdb/1kei.pdb	e_coli_pyscomotif	A142,A143,A146,A157,A166,A226,A231	pyScoMotif	12	4.346	0	result/mcsa_pyscomotif_results/1kei_e_coli_pyscomotif_pyscomotif.csv
query/M-CSA/pdb/1ryp.pdb	e_coli_pyscomotif	I1,I17,I19,I33,I47,I129,I166,I169	pyScoMotif	12	6.542	0	result/mcsa_pyscomotif_results/1ryp_e_coli_pyscomotif_pyscomotif.csv
query/M-CSA/pdb/1bmf.pdb	e_coli_pyscomotif	C373,D162,D188,D189	pyScoMotif	12	4.935	0	result/mcsa_pyscomotif_results/1bmf_e_coli_pyscomotif_pyscomotif.csv
query/M-CSA/pdb/1q3s.pdb	e_coli_pyscomotif	A64,A97,A98,A393	pyScoMotif	12	4.973	1	result/mcsa_pyscomotif_results/1q3s_e_coli_pyscomotif_pyscomotif.csv
query/M-CSA/pdb/1hyo.pdb	e_coli_pyscomotif	A126,A133,A199,A201,A233,A237,A240,A253,A257,A364	pyScoMotif	12	5.289	0	result/mcsa_pyscomotif_results/1hyo_e_coli_pyscomotif_pyscomotif.csv
query/M-CSA/pdb/1rql.pdb	e_coli_pyscomotif	A12,A14,A45,A49,A53,A56,A160,A186	pyScoMotif	12	4.2	0	result/mcsa_pyscomotif_results/1rql_e_coli_pyscomotif_pyscomotif.csv
query/M-CSA/pdb/1mum.pdb	e_coli_pyscomotif	A43,A58,A85,A87,A113,A115,A123,A158,A188,A210	pyScoMotif	12	5.115	0	result/mcsa_pyscomotif_results/1mum_e_coli_pyscomotif_pyscomotif.csv
query/M-CSA/pdb/1dnp.pdb	e_coli_pyscomotif	A274,A277,A306,A341,A359,A382	pyScoMotif	12	4.255	1	result/mcsa_pyscomotif_results/1dnp_e_coli_pyscomotif_pyscomotif.csv
query/M-CSA/pdb/1pwh.pdb	e_coli_pyscomotif	A41,A222,A303	pyScoMotif	12	4.63	3	result/mcsa_pyscomotif_results/1pwh_e_coli_pyscomotif_pyscomotif.csv
query/M-CSA/pdb/1mns.pdb	e_coli_pyscomotif	A164,A166,A195,A197,A221,A247,A270,A297,A317	pyScoMotif	12	4.815	0	result/mcsa_pyscomotif_results/1mns_e_coli_pyscomotif_pyscomotif.csv
query/M-CSA/pdb/1xel.pdb	e_coli_pyscomotif	A124,A149,A153	pyScoMotif	12	4.172	29	result/mcsa_pyscomotif_results/1xel_e_coli_pyscomotif_pyscomotif.csv
query/M-CSA/pdb/1m9c.pdb	e_coli_pyscomotif	A55,A60,A63,A102,A113,A122,A126	pyScoMotif	12	4.48	0	result/mcsa_pyscomotif_results/1m9c_e_coli_pyscomotif_pyscomotif.csv
query/M-CSA/pdb/1nfs.pdb	e_coli_pyscomotif	A25,A32,A67,A69,A87,A104,A114,A116,A161	pyScoMotif	12	5.106	1	result/mcsa_pyscomotif_results/1nfs_e_coli_pyscomotif_pyscomotif.csv
query/M-CSA/pdb/1mek.pdb	e_coli_pyscomotif	A36,A37,A38,A39	pyScoMotif	12	5.774	3	result/mcsa_pyscomotif_results/1mek_e_coli_pyscomotif_pyscomotif.csv
query/M-CSA/pdb/1z9h.pdb	e_coli_pyscomotif	A107,A110,A112,A113	pyScoMotif	12	3.875	0	result/mcsa_pyscomotif_results/1z9h_e_coli_pyscomotif_pyscomotif.csv
query/M-CSA/pdb/1p5d.pdb	e_coli_pyscomotif	X20,X108,X109,X118,X242,X244,X246,X247,X329	pyScoMotif	12	0.682	0	result/mcsa_pyscomotif_results/1p5d_e_coli_pyscomotif_pyscomotif.csv
query/M-CSA/pdb/2gsa.pdb	e_coli_pyscomotif	A150,A245,A273	pyScoMotif	12	4.376	7	result/mcsa_pyscomotif_results/2gsa_e_coli_pyscomotif_pyscomotif.csv
query/M-CSA/pdb/1eyq.pdb	e_coli_pyscomotif	A48,A97,A106	pyScoMotif	12	3.77	4	result/mcsa_pyscomotif_results/1eyq_e_coli_pyscomotif_pyscomotif.csv
query/M-CSA/pdb/2ts1.pdb	e_coli_pyscomotif	A40,A45,A48,A82,A86,A173,A194,A230,A233,A234	pyScoMotif	12	4.853	0	result/mcsa_pyscomotif_results/2ts1_e_coli_pyscomotif_pyscomotif.csv
query/M-CSA/pdb/1v25.pdb	e_coli_pyscomotif	A184,A328,A439,A444	pyScoMotif	12	4.375	0	result/mcsa_pyscomotif_results/1v25_e_coli_pyscomotif_pyscomotif.csv
query/M-CSA/pdb/1gsa.pdb	e_coli_pyscomotif	A125,A160,A210,A225,A233,A273,A281,A283	pyScoMotif	12	5.03	1	result/mcsa_pyscomotif_results/1gsa_e_coli_pyscomotif_pyscomotif.csv
query/M-CSA/pdb/1xny.pdb	e_coli_pyscomotif	A182,A183,B419,B420	pyScoMotif	12	4.943	844	result/mcsa_pyscomotif_results/1xny_e_coli_pyscomotif_pyscomotif.csv
query/M-CSA/pdb/1a0i.pdb	e_coli_pyscomotif	A34,A238,A240	pyScoMotif	12	3.814	6	result/mcsa_pyscomotif_results/1a0i_e_coli_pyscomotif_pyscomotif.csv
query/M-CSA/pdb/1gpb.pdb	e_coli_pyscomotif	A377,A568,A569,A574,A676,A680	pyScoMotif	12	4.838	0	result/mcsa_pyscomotif_results/1gpb_e_coli_pyscomotif_pyscomotif.csv
query/M-CSA/pdb/1o08.pdb	e_coli_pyscomotif	A1008,A1009,A1010,A1016,A1045,A1114,A1115,A1145,A1169,A1170	pyScoMotif	12	4.958	0	result/mcsa_pyscomotif_results/1o08_e_coli_pyscomotif_pyscomotif.csv
query/M-CSA/pdb/1kc7.pdb	e_coli_pyscomotif	A22,A92,A101,A103,A337,A455,A764,A831,A851	pyScoMotif	12	4.875	0	result/mcsa_pyscomotif_results/1kc7_e_coli_pyscomotif_pyscomotif.csv
query/M-CSA/pdb/1ezv.pdb	e_coli_pyscomotif	C202,C206,C228,C229,C272,E161	pyScoMotif	12	4.764	0	result/mcsa_pyscomotif_results/1ezv_e_coli_pyscomotif_pyscomotif.csv
query/M-CSA/pdb/1m6k.pdb	e_coli_pyscomotif	A67,A70,A115,A120,A160,A215	pyScoMotif	12	0.663	0	result/mcsa_pyscomotif_results/1m6k_e_coli_pyscomotif_pyscomotif.csv
query/M-CSA/pdb/1idt.pdb	e_coli_pyscomotif	A14,A74,A165	pyScoMotif	12	4.012	5	result/mcsa_pyscomotif_results/1idt_e_coli_pyscomotif_pyscomotif.csv
query/M-CSA/pdb/1n2c.pdb	e_coli_pyscomotif	A62,A65,A96,A195,B153,B157,E10,E129,F15,F41	pyScoMotif	12	5.684	0	result/mcsa_pyscomotif_results/1n2c_e_coli_pyscomotif_pyscomotif.csv
query/M-CSA/pdb/1l6g.pdb	e_coli_pyscomotif	A39,A136,A166,A219,B265,B311,B313	pyScoMotif	12	4.492	0	result/mcsa_pyscomotif_results/1l6g_e_coli_pyscomotif_pyscomotif.csv
query/M-CSA/pdb/1ecf.pdb	e_coli_pyscomotif	A1,A27,A101,A102,A258	pyScoMotif	12	4.816	1	result/mcsa_pyscomotif_results/1ecf_e_coli_pyscomotif_pyscomotif.csv
query/M-CSA/pdb/1pvd.pdb	e_coli_pyscomotif	A416,A477,B28,B51,B114,B115	pyScoMotif	12	4.43	0	result/mcsa_pyscomotif_results/1pvd_e_coli_pyscomotif_pyscomotif.csv
query/M-CSA/pdb/1ca2.pdb	e_coli_pyscomotif	A64,A94,A96,A106,A119,A199	pyScoMotif	12	4.235	0	result/mcsa_pyscomotif_results/1ca2_e_coli_pyscomotif_pyscomotif.csv
query/M-CSA/pdb/1sc9.pdb	e_coli_pyscomotif	A11,A80,A81,A207,A235,A236	pyScoMotif	12	4.361	0	result/mcsa_pyscomotif_results/1sc9_e_coli_pyscomotif_pyscomotif.csv
query/M-CSA/pdb/1hpl.pdb	e_coli_pyscomotif	A77,A152,A153,A176,A263	pyScoMotif	12	4.335	0	result/mcsa_pyscomotif_results/1hpl_e_coli_pyscomotif_pyscomotif.csv
query/M-CSA/pdb/1trk.pdb	e_coli_pyscomotif	A30,A263,B418,B481	pyScoMotif	12	4.436	2	result/mcsa_pyscomotif_results/1trk_e_coli_pyscomotif_pyscomotif.csv
query/M-CSA/pdb/1mcz.pdb	e_coli_pyscomotif	A281,A401,B26,B28,B47,B70	pyScoMotif	12	6.327	0	result/mcsa_pyscomotif_results/1mcz_e_coli_pyscomotif_pyscomotif.csv
query/M-CSA/pdb/2ag0.pdb	e_coli_pyscomotif	A419,B29,B50,B113	pyScoMotif	12	4.783	1	result/mcsa_pyscomotif_results/2ag0_e_coli_pyscomotif_pyscomotif.csv
query/M-CSA/pdb/2qut.pdb	e_coli_pyscomotif	A33,A146,A187,A189,A229,A300,A363	pyScoMotif	12	4.787	0	result/mcsa_pyscomotif_results/2qut_e_coli_pyscomotif_pyscomotif.csv
query/M-CSA/pdb/2qf7.pdb	e_coli_pyscomotif	A283,A297,A299,A305,A353,A549,A655,A718,A747,A749,A882	pyScoMotif	12	0.871	0	result/mcsa_pyscomotif_results/2qf7_e_coli_pyscomotif_pyscomotif.csv
query/M-CSA/pdb/1vr7.pdb	e_coli_pyscomotif	A55,A62,A63,A68,A83	pyScoMotif	12	4.622	0	result/mcsa_pyscomotif_results/1vr7_e_coli_pyscomotif_pyscomotif.csv
query/M-CSA/pdb/1qrr.pdb	e_coli_pyscomotif	A145,A180,A182,A183,A186	pyScoMotif	12	4.177	0	result/mcsa_pyscomotif_results/1qrr_e_coli_pyscomotif_pyscomotif.csv
query/M-CSA/pdb/1e6u.pdb	e_coli_pyscomotif	A107,A108,A109,A136,A140,A179	pyScoMotif	12	4.198	0	result/mcsa_pyscomotif_results/1e6u_e_coli_pyscomotif_pyscomotif.csv
query/M-CSA/pdb/1bxk.pdb	e_coli_pyscomotif	A134,A135,A136,A160,A164	pyScoMotif	12	4.593	2	result/mcsa_pyscomotif_results/1bxk_e_coli_pyscomotif_pyscomotif.csv
query/M-CSA/pdb/2a84.pdb	e_coli_pyscomotif	A40,A44,A47,A88,A89,A92,A160,A196,A197,A198	pyScoMotif	12	4.794	0	result/mcsa_pyscomotif_results/2a84_e_coli_pyscomotif_pyscomotif.csv
query/M-CSA/pdb/1uw8.pdb	e_coli_pyscomotif	A92,A95,A97,A101,A140,A162	pyScoMotif	12	4.445	0	result/mcsa_pyscomotif_results/1uw8_e_coli_pyscomotif_pyscomotif.csv
query/M-CSA/pdb/1a41.pdb	e_coli_pyscomotif	A130,A167,A223,A265,A274	pyScoMotif	12	0.635	0	result/mcsa_pyscomotif_results/1a41_e_coli_pyscomotif_pyscomotif.csv
query/M-CSA/pdb/1gpm.pdb	e_coli_pyscomotif	A59,A86,A87,A181,A183,A239,A381	pyScoMotif	12	4.837	0	result/mcsa_pyscomotif_results/1gpm_e_coli_pyscomotif_pyscomotif.csv
query/M-CSA/pdb/1f7u.pdb	e_coli_pyscomotif	A156,A159,A162	pyScoMotif	12	3.951	3	result/mcsa_pyscomotif_results/1f7u_e_coli_pyscomotif_pyscomotif.csv
query/M-CSA/pdb/1q6l.pdb	e_coli_pyscomotif	A36,A37,A64,A112,A136,A139,B67,B68,B72	pyScoMotif	12	4.859	0	result/mcsa_pyscomotif_results/1q6l_e_coli_pyscomotif_pyscomotif.csv
query/M-CSA/pdb/2c7v.pdb	e_coli_pyscomotif	A14,A161,A174	pyScoMotif	12	4.367	9	result/mcsa_pyscomotif_results/2c7v_e_coli_pyscomotif_pyscomotif.csv
query/M-CSA/pdb/1wpo.pdb	e_coli_pyscomotif	A63,A132,A134,A157,A165,A166	pyScoMotif	12	4.522	0	result/mcsa_pyscomotif_results/1wpo_e_coli_pyscomotif_pyscomotif.csv
query/M-CSA/pdb/7atj.pdb	e_coli_pyscomotif	A38,A42,A70,A170	pyScoMotif	12	4.675	1	result/mcsa_pyscomotif_results/7atj_e_coli_pyscomotif_pyscomotif.csv
query/M-CSA/pdb/1szd.pdb	e_coli_pyscomotif	A42,A43,A44,A45,A116,A118,A135	pyScoMotif	12	4.318	0	result/mcsa_pyscomotif_results/1szd_e_coli_pyscomotif_pyscomotif.csv
query/M-CSA/pdb/3pva.pdb	e_coli_pyscomotif	A1,A82,A175,A228	pyScoMotif	12	5.088	0	result/mcsa_pyscomotif_results/3pva_e_coli_pyscomotif_pyscomotif.csv
query/M-CSA/pdb/2f9r.pdb	e_coli_pyscomotif	A12,A34,A47,A48,A52,A93,A230,A233,A252	pyScoMotif	12	5.02	0	result/mcsa_pyscomotif_results/2f9r_e_coli_pyscomotif_pyscomotif.csv
query/M-CSA/pdb/1ho1.pdb	e_coli_pyscomotif	A9,A12,A45,A47,A51,A72,A103,A153,A193	pyScoMotif	12	0.724	0	result/mcsa_pyscomotif_results/1ho1_e_coli_pyscomotif_pyscomotif.csv
query/M-CSA/pdb/1kzl.pdb	e_coli_pyscomotif	A2,A41,A48,A50,A64,A102,A148	pyScoMotif	12	5.092	0	result/mcsa_pyscomotif_results/1kzl_e_coli_pyscomotif_pyscomotif.csv
query/M-CSA/pdb/1a7u.pdb	e_coli_pyscomotif	A32,A98,A99,A228,A257	pyScoMotif	12	4.28	1	result/mcsa_pyscomotif_results/1a7u_e_coli_pyscomotif_pyscomotif.csv
query/M-CSA/pdb/1dty.pdb	e_coli_pyscomotif	A17,A144,A245,A274	pyScoMotif	12	4.067	1	result/mcsa_pyscomotif_results/1dty_e_coli_pyscomotif_pyscomotif.csv
query/M-CSA/pdb/2cpo.pdb	e_coli_pyscomotif	A29,A105,A106,A183	pyScoMotif	12	3.822	0	result/mcsa_pyscomotif_results/2cpo_e_coli_pyscomotif_pyscomotif.csv
query/M-CSA/pdb/1eh6.pdb	e_coli_pyscomotif	A114,A137,A145,A146,A172	pyScoMotif	12	4.031	2	result/mcsa_pyscomotif_results/1eh6_e_coli_pyscomotif_pyscomotif.csv
query/M-CSA/pdb/1igs.pdb	e_coli_pyscomotif	A51,A53,A110,A159,A180,A210,A211	pyScoMotif	12	4.463	1	result/mcsa_pyscomotif_results/1igs_e_coli_pyscomotif_pyscomotif.csv
[truncated: 2,019 more rows]

## Sheet: Supplementary Table 4
Supplementary Table 4. Folddisco search result of full zinc finger motif (4 residues)
[truncated: 743 more rows]

## Sheet: Supplementary Table 5
Supplementary Table 5. Folddisco prefilter search result of full zinc finger motif (4 residues)
[truncated: 815 more rows]

[truncated: 15 more sheets: Supplementary Table 6, Supplementary Table 7, Supplementary Table 8, Supplementary Table 9, Supplementary Table 10, Supplementary Table 11, Supplementary Table 12, Supplementary Table 13, Supplementary Table 14, Supplementary Table 15, Supplementary Table 16, Supplementary Table 17, Supplementary Table 18, Supplementary Table 19, Supplementary Table 20]
